# **Honeybee gut microbiota modulates host behaviors and neurological processes**

Zijing Zhang<sup>1</sup>, Xiaohuan Mu<sup>1</sup>, Qina Cao<sup>1</sup>, Yao Shi<sup>1</sup>, Xiaosong Hu<sup>1</sup>, Hao Zheng<sup>1,2,\*</sup>

<sup>1</sup>College of Food Science and Nutritional Engineering, China Agricultural University, 100083 Beijing, China

\*e-mail: hao.zheng@cau.edu.cn ([hao.zheng@cau.edu.cn](mailto:hao.zheng@cau.edu.cn)).

## 1 **Abstract**

2 Honeybee is a highly social insect with a reach behavioral repertoire and is a versatile  
3 model for neurobiological research. The honeybee gut microbiota is composed of a limited  
4 number of bacterial phylotypes that play an important role in host health. However, it  
5 remains unclear whether the microbiota can shape brain profiles and behaviors. Here, we  
6 revealed that the gut microbiota is requisite for the olfactory learning and memory ability of  
7 honeybees and alters the level of neurotransmitters in the brain. Transcriptomic and  
8 proteomic analysis showed distinctive gene expression and protein signatures for gnotobiotic  
9 bees associated with different gut bacteria. Specifically, genes related to olfactory functions  
10 and labor division are most upregulated. Moreover, differentially spliced genes in the brains  
11 of colonized bees largely overlapped with the datasets for human autism. The circulating  
12 metabolome profiles identified that different gut species regulated specific module of  
13 metabolites in the host hemolymph. Most altered metabolites are involved in the amino acid  
14 and glycerophospholipid metabolism pathways for the production of neuroactive  
15 compounds. Finally, antibiotic treatment disturbed the gut community and the nursing  
16 behavior of worker bees under field conditions. The brain transcripts and gut metabolism  
17 was also greatly interfered in treated bees. Collectively, we demonstrate that the gut  
18 microbiota regulates honeybee behaviors, brain gene transcription, and the circulating  
19 metabolism. Our findings highlight the contributions of honeybee gut microbes in the  
20 neurological processes with striking parallels to those found in other animals, thus providing  
21 a promising model to understand the host-microbe interactions via the gut-brain axis.

22 **Keywords:** *Apis mellifera*, gut microbiota, social behavior, metabolism, gut-brain axis

## 23 Introduction

24 There is growing recognition that the gut microbiota plays a significant role in  
25 modulating host development and physiology, including metabolism and immune functions.  
26 Recent researches have focused on the effects of symbiotic microbes on the host's central  
27 nervous system (CNS) and their involvement in the host behavioral processes. It reveals that  
28 gut microbiota can impact the host brain through a diverse set of pathways such as immune  
29 modulation and production of microbial metabolites implicated in the regulation of the gut-  
30 brain axis<sup>1,2</sup>. The symbiotic microorganisms inhabiting the gastrointestinal intestine are  
31 capable of producing various metabolites including neurotransmitters, amino acids, and  
32 short-chain fatty acids (SCFAs) that influence brain physiology<sup>3-5</sup>. While it is unclear if the  
33 neurotransmitters produced by certain gut bacteria (e.g., GABA, serotonin, and dopamine)  
34 can reach the brain considering their short half-lives and the block by the blood-brain barrier,  
35 the gut microbiota is capable of influencing brain physiology indirectly. Various SCFAs  
36 derived from microbial fermentation in the gut such as propionate and butyrate were  
37 suggested to regulate the rate-limiting enzymes involved in the biosynthesis of  
38 neurotransmitters in the brain<sup>6</sup>. Gut microbiota interferes CNS serotonergic  
39 neurotransmission by downregulating the level of tryptophan, the precursor of 5-  
40 hydroxytryptamine (5-HT), in the circulatory system, which further reduced the anxiety  
41 behavior in germ-free mice<sup>5</sup>. Furthermore, the expression level and alternative splicing of  
42 autism spectrum disorder (ASD)-related genes in the brain are proudly disturbed in mice  
43 harboring human ASD microbiome, which produces differential metabolome profiles<sup>7</sup>.  
44 Although the significance of the functional connection between microbiota and  
45 neurophysiology has been widely appreciated, most current studies focused on the  
46 mammalian and non-social insect models. Further, it is challenging to unravel the distinctive  
47 contribution of individual gut members, which is partly due to the complex and erratic

48 compositions of gut community and the difficulty to maintain and manipulate gnotobiotic  
49 animals<sup>8</sup>. Thus, models exhibiting high sociality and less complex gut community would be  
50 ideal to fully understand the relationship between the gut microbiota and host social  
51 behaviors.

52 Honeybee is a eusocial insect with distinct behavioral structures characterized by a  
53 complex range of interactive behaviors within the hive, and it has been extensively used as a  
54 model of perception, cognition, and social behaviors. A set of established methods are  
55 available to quantify the sophisticated behaviors of honeybee, such as associative appetitive  
56 learning and memory, sensory responsiveness, and hive behavioral observation<sup>9</sup>. It has been  
57 well documented that honeybees have a simple and host-specialized gut microbiota, with 8 ~  
58 10 bacterial phylotypes comprising over 97% of the community<sup>10-12</sup>. Most bacterial  
59 phylotypes contain several divergent ‘sequence-discrete populations’ (SDPs) and a high  
60 extent of strain-level diversity<sup>10,12</sup>. All major bacterial phylotypes, including *Snodgrassella*,  
61 *Gilliamella*, *Bifidobacterium*, *Lactobacillus* Firm-4 and Firm-5, and *Bartonella* can be  
62 cultivated in the laboratory. Additionally, microbiota-free (MF) bees are experimentally  
63 tractable and can be colonized with defined communities of cultured strains<sup>13,14</sup>. Bee gut  
64 bacteria inhabit diverse niches and play specific roles in the bee gut, and they are beneficial  
65 to the host nutrition, immune homeostasis, and pathogen resistance<sup>15</sup>. These are probably  
66 accomplished via the microbial fermentation in the gut. The bee gut microbiota contributes  
67 to the degradation of diet polysaccharides, and untargeted metabolomics revealed that a  
68 plethora of organic acids accumulate in the presence of gut bacteria, which may have pivotal  
69 functional consequences in host physiology<sup>13,16</sup>.

70 Although the impact of gut community on the host’s health is relatively clear, few  
71 experiments have searched for the potential links between the honeybee gut microbiota and  
72 behavior. Pioneering explorations find that the level of biogenic amines (serotonin,

73 dopamine, octopamine) implicated in bee behaviors is lower in newly emerged bees, which  
74 have an immature gut community<sup>17</sup>. In-lab-generated bees with a conventional (CV) gut  
75 microbiota behave differently in the gustatory responsiveness, and they possess altered  
76 endocrine signaling compared to the MF bees. Indeed, the gut microbiota affect the host  
77 metabolism that the hemolymph metabolomic profiles of CV and MF bees are separated<sup>14</sup>.  
78 The mono-association with the *Bifidobacterium asteroides* elevates the concentration of  
79 juvenile hormone III derivatives in the gut, which may regulate the host development<sup>13</sup>. All  
80 these findings strongly suggest that the honeybee gut microbiota may contribute to the host  
81 brain physiology and behavior phenotypes. Thus, it provides a particularly well-suited model  
82 to gain a detailed understanding of the gut microbiota-brain interactions.

83       Herein, we established gnotobiotic bees mono-colonized with different gut bacteria or  
84 with a conventional microbiota and identified that the presence of microbiota was sufficient  
85 to promote the host's perception and cognition. Multi-omics analysis revealed that gut  
86 bacteria impact the neurotransmitter concentration, transcriptional program, protein level in  
87 the brain, as well as the circulating metabolic profiles. Finally, we confirmed that antibiotic  
88 exposure under field condition disturbs the hive behaviors of nurse bees, which is associated  
89 with altered brain transcripts and metabolite pools in the gut.

## 90 **Results**

### 91 **Gut microbiota alters honeybee behaviors and brain neurotransmitter level**

92 The ability to discriminate and memorize odors is critical for the social behaviors of  
93 honeybees, such as division of labor, organization of feeding, kin recognition, and  
94 mating<sup>18,19</sup>. We first examined whether the colonization of gut microbiota affects the  
95 olfactory learning and memory ability of bees under laboratory conditions. Each individual  
96 of CV, tetracycline treated (CV+tet), or MF bees generated in the lab (Methods,  
97 Supplementary Fig. 1a) was trained for 10 trials to associate the stimulus odor (nonanol) to a  
98 sucrose reward, and the memory test was performed 3h after the associative learning. Bees  
99 only responded to nonanol odor were considered to be a successful one (Fig. 1a,  
100 Supplementary Movie 1). Almost 50% of CV bees were able to memorize the nonanol odor  
101 and can distinguish the conditioned stimulus from the negative control odor (hexanol), and  
102 this percentage is similar to the previous test of hive bees performing the olfactory learning  
103 task<sup>20</sup>. In contrast, the proportion of successfully memorized individuals was significantly  
104 decreased in the antibiotic treatment group, and surprisingly, not an MF bee exhibited  
105 successful memory behavior (Fig. 1b). This suggests that the gut microbiota can apparently  
106 affect the learning and memory ability of bees. Proboscis extension response (PER) is a  
107 taste-related behavior that is fundamental for olfactory discrimination<sup>21</sup>. We then measured  
108 the PER of MF and CV bees, and bees mono-colonized with six different bacterial  
109 phylotypes (*Snodgrassella*, Sn; *Gilliamella*, Gi; *Bifidobacterium*, Bi; *Lactobacillus* Firm-4,  
110 F4; *Lactobacillus* Firm-5, F5; *Bartonella*, Ba) to estimate the olfactory sensation affected by  
111 the specific gut member. Compared to the MF group, CV bees are more sensitive to the low  
112 concentration of sucrose, which is consistent with the previous finding<sup>14</sup>. However, for the

113 mono-colonized groups, only the colonization of F5 significantly elevated the sucrose  
114 sensitivity of bees (Fig. 1c), implying an integrative effect of the gut bacteria.

115 Disordered olfactory behaviors are associated with alteration of neurotransmission in  
116 the bee brain<sup>22,23</sup>. Therefore, we investigated the changes in the brain's neurochemistry of  
117 MF, CV, and mono-colonized bees. The concentration of five major neurotransmitters 5-HT,  
118 dopamine, GABA, tyramine, and octopamine that are important modulators of honeybee  
119 behaviors were determined in the brains. The concentration of 5-HT was significantly lower  
120 in CV bees and bees mono-colonized with Gi, F4, F5, and Ba than that in the MF bees (Fig.  
121 1d). Likewise, dopamine that inhibits appetitive learning and decreases sucrose sensitivity in  
122 foragers<sup>22,23</sup> was also decreased in bacteria-colonized bees (Fig. 1e). In contrast, the  
123 inhibitory transmitter GABA, which is required for fine odor discrimination<sup>24</sup> and odor  
124 learning<sup>25,26</sup>, was significantly higher in the brains of Bi, Sn, and F4 bees (Fig. 1F). The  
125 biogenic amine, octopamine, and its precursor tyramine were not obviously altered by the  
126 conventional gut microbiota, while they are lowered in mono-colonized bee groups  
127 (Supplementary Fig. 1b, c). All these findings indicate that the colonization of either the  
128 normal gut microbiota or each single core gut member can affect the neurotransmitter levels  
129 in the brain, which might be associated with the altered olfactory sensitivity and learning-  
130 memory performance.

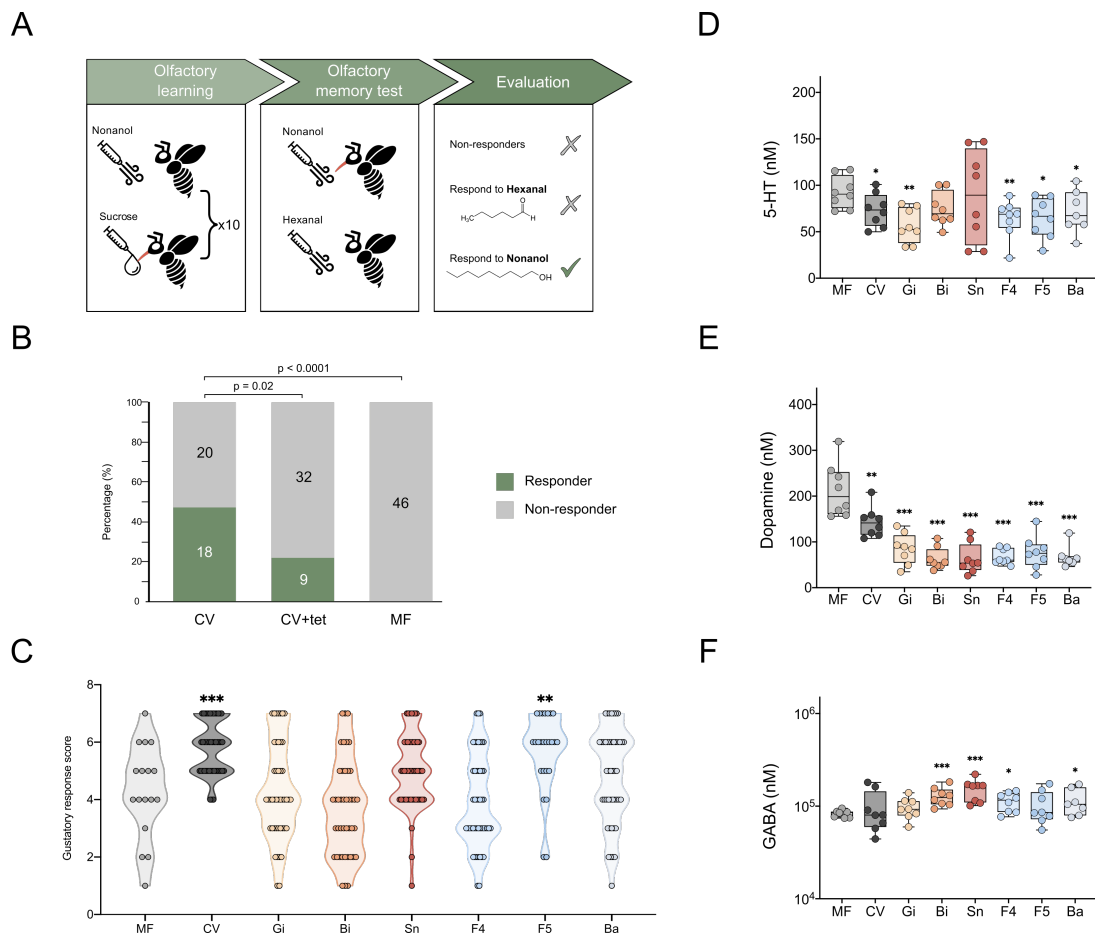

131

132

**Fig. 1. Gut microbiota alters honeybee behaviors and the concentration of**

133

**neurotransmitters in the brain. (a)** Olfactory learning and memory test design: 7-day-old

134

conventionalized (CV), tetracycline-treated conventionalized (CV+tet), and microbiota-free

135

(MF) bees were tested. Bees were trained to associate a conditional stimulus (nonanol odor)

136

with a sucrose reward presented in ten successive trials. Bees responded only to nonanol

137

odor in the memory test were considered successful. **(b)** Ratio of successfully memorized

138

bees in the CV (n = 38), CV+tet (n = 41), and MF groups (n = 46). Group differences were

139

tested by Chi-squared test. **(c)** Distribution of gustatory response score of MF (n = 17), CV

140

bees (n = 46), and bees mono-colonized with different core gut bacteria: Gi, *Gilliamella*

141

*apicola* (n = 45); Bi, *Bifidobacterium asteroides* (n = 42); Sn, *Snodgrassella alvi* (n = 50);

142

F4, *Lactobacillus Firm-4* (n = 48); F5, *Lactobacillus Firm-5* (n = 25); Ba, *Bartonella apis* (n

143

= 46). Each circle indicates a bee response to the provided concentration of sucrose. \*\*p <



144 0.01, \*\*\* $p < 0.001$  (Mann–Whitney  $u$  test for the comparison with the MF group). **(d-f)**  
145 Concentrations of **(d)** 5-HT, **(e)** dopamine, and **(f)** GABA in the brains of MF ( $n = 8$ ), CV ( $n$   
146  $= 8$ ), and mono-colonized ( $n = 8$ , except  $n = 7$  for Ba group) bees. Differences between  
147 bacteria-colonized and MF bees were tested by Mann-Whitney  $u$  test (\* $p < 0.1$ , \*\* $p < 0.01$ ,  
148 \*\*\* $p < 0.001$ ). Error bars represent min and max **(d-f)**.

## 149 **Transcriptomic and alternative splicing profiles in the brain**

150 The performance in PER and olfactory learning-memory behavior of honeybees is  
151 primarily associated with the gene expression profiles in the brain<sup>27</sup>. In total, our RNA  
152 sequencing analysis revealed that 713 genes were differentially expressed in bees  
153 colonized with gut members compared to MF bees (Supplementary Data 1), and different  
154 bee groups exhibited distinctive brain gene expression profiles (Supplementary Fig. 2a).  
155 Insect odorant-binding proteins (OBPs) play key roles in transport odorant molecules to  
156 olfactory receptors<sup>28</sup>, which is essential for the detection and distinguishment of specific  
157 odors<sup>29</sup>. Here, we found that the G protein-coupled olfactory receptor *Or115* and odorant  
158 binding protein *Obp14* were both upregulated in the CV group (Fig. 2a, Supplementary  
159 Fig. 2b), corroborating with the higher olfactory sensitivity of bees with a conventional  
160 microbiota (Fig. 1c). In addition, seven of the ten *mrjp* family genes of the major royal  
161 jelly protein (MRJP) encoding in *A. mellifera* genome were significantly upregulated in Bi  
162 and Sn groups, while bees colonized with *Gilliamella* exhibited decreased expression of  
163 the *mrjp* genes (Supplementary Fig. 2b). MRJPs have polyfunctional properties and  
164 participate in all major aspects of eusocial behavior in honeybees, such as caste  
165 determination and age polyethism<sup>30</sup>. Furthermore, genes encoding vitellogenin and the  
166 hexamerin HEX70a, which are both involved in the regulation of bee hormonal dynamics  
167 and the transition of foraging behavior<sup>31,32</sup>, were also upregulated in Bi and Sn groups  
168 (Supplementary Fig. 2b). The enrichment analysis of differentially expressed genes  
169 identified that KEGG pathways including linoleic, alpha-linolenic, arachidonic acids, and  
170 glycerophospholipid metabolism were upregulated in brains of different bacteria-  
171 colonized groups (Fig. 2b). The glycolysis/gluconeogenesis pathway that is critical for  
172 brain physiology via providing the fuel for brain functions<sup>33</sup> was only upregulated in bees  
173 colonized with *Gilliamella*, while the protein processing, export, and ribosome pathways

174 were upregulated in the Sn group. These results showed that the transcriptomic programs  
175 are differentially altered in the bacteria-colonized groups.

176 The gut microbiota does not only regulate gene expression but also affect alternative  
177 splicing (AS) of genes in the brain<sup>7</sup>, thus we investigate whether gut bacteria colonized  
178 bee brains show different AS events compared with the MF bees. rMATS analysis of the  
179 alternative splicing events of the brain genes detected a total of 22,064 events in 5,281  
180 genes, and skipped exon (SE) is the most abundant among different types of AS. About  
181 10–25% of events for each type of AS showed significantly different inclusion rates in  
182 bacteria-colonized bees (Supplementary Fig. 3a). The relative abundance of different  
183 types of AS events were similar across bee groups (Supplementary Fig. 3a). However, the  
184 UpSet plot shows that the vast majority of events do not intersect between sets, indicating  
185 that multiple AS events can occur in a single gene and the gut members cause different  
186 AS events (Supplementary Fig. 3b). Interestingly, it has been shown that the gene  
187 expression signatures of honeybees with disordered social behaviors are significantly  
188 enriched for human autism spectrum disorder (ASD)-related genes<sup>34</sup>. Likewise, the  
189 differentially expressed genes in bacteria-colonized bees also overlapped with those from  
190 human ASD patients (Supplementary Fig. 3c), implying the involvement of gut  
191 microbiota in host behaviors. Besides, dysregulation of alternative splicing in ASD-related  
192 genes is also associated with the psychiatric disorder<sup>35</sup>. Thus, we examined the overlap of  
193 genes showing significantly differential AS events between MF bees and bacteria-  
194 colonized groups with the ASD risk genes from the SPARK for Autism and the SFARI  
195 Gene datasets<sup>36</sup> (Fig. 2c). Three hundred and two of the 2,753 differentially spliced genes  
196 in MF bees are associated with human autism, and 64 genes are present in both SPARK  
197 and SFARI Gene list (Fig. 2c). Interestingly, almost all identified homologs belong to the  
198 high-confidence SFARI gene list (Category 1) that have been clearly implicated in ASD

199 (Supplementary Data 2). Specifically, we detected differential AS events of genes in MF  
200 bees in comparison with bacteria-colonized bees are related to the pathophysiology of  
201 ASD. For example, the inclusion rates of both mutually exclusive exon (MXE) and SE  
202 events in the *Ank2* gene that is important for neuronal migration<sup>37,38</sup> are regulated in Gi,  
203 Sn, Bi, F4, and CV groups compared to MF bees (Fig. 2d). The synapse active-zone  
204 protein-coding gene *Rims1* with important roles in the maintenance of normal synaptic  
205 function<sup>39</sup> also exhibited different inclusion rates of MXE and SE. Taken together, we  
206 identified that the gut microbes not only induce the differential gene expression profiles in  
207 the honeybee brain but also mediate AS resulting in specific gene isoforms. Genes  
208 essential for bee social behaviors and related to human ASD disease are apparently  
209 affected by different gut members, confirming the similarities in genes associated with  
210 social responsiveness of humans and honeybees<sup>34</sup>.

211

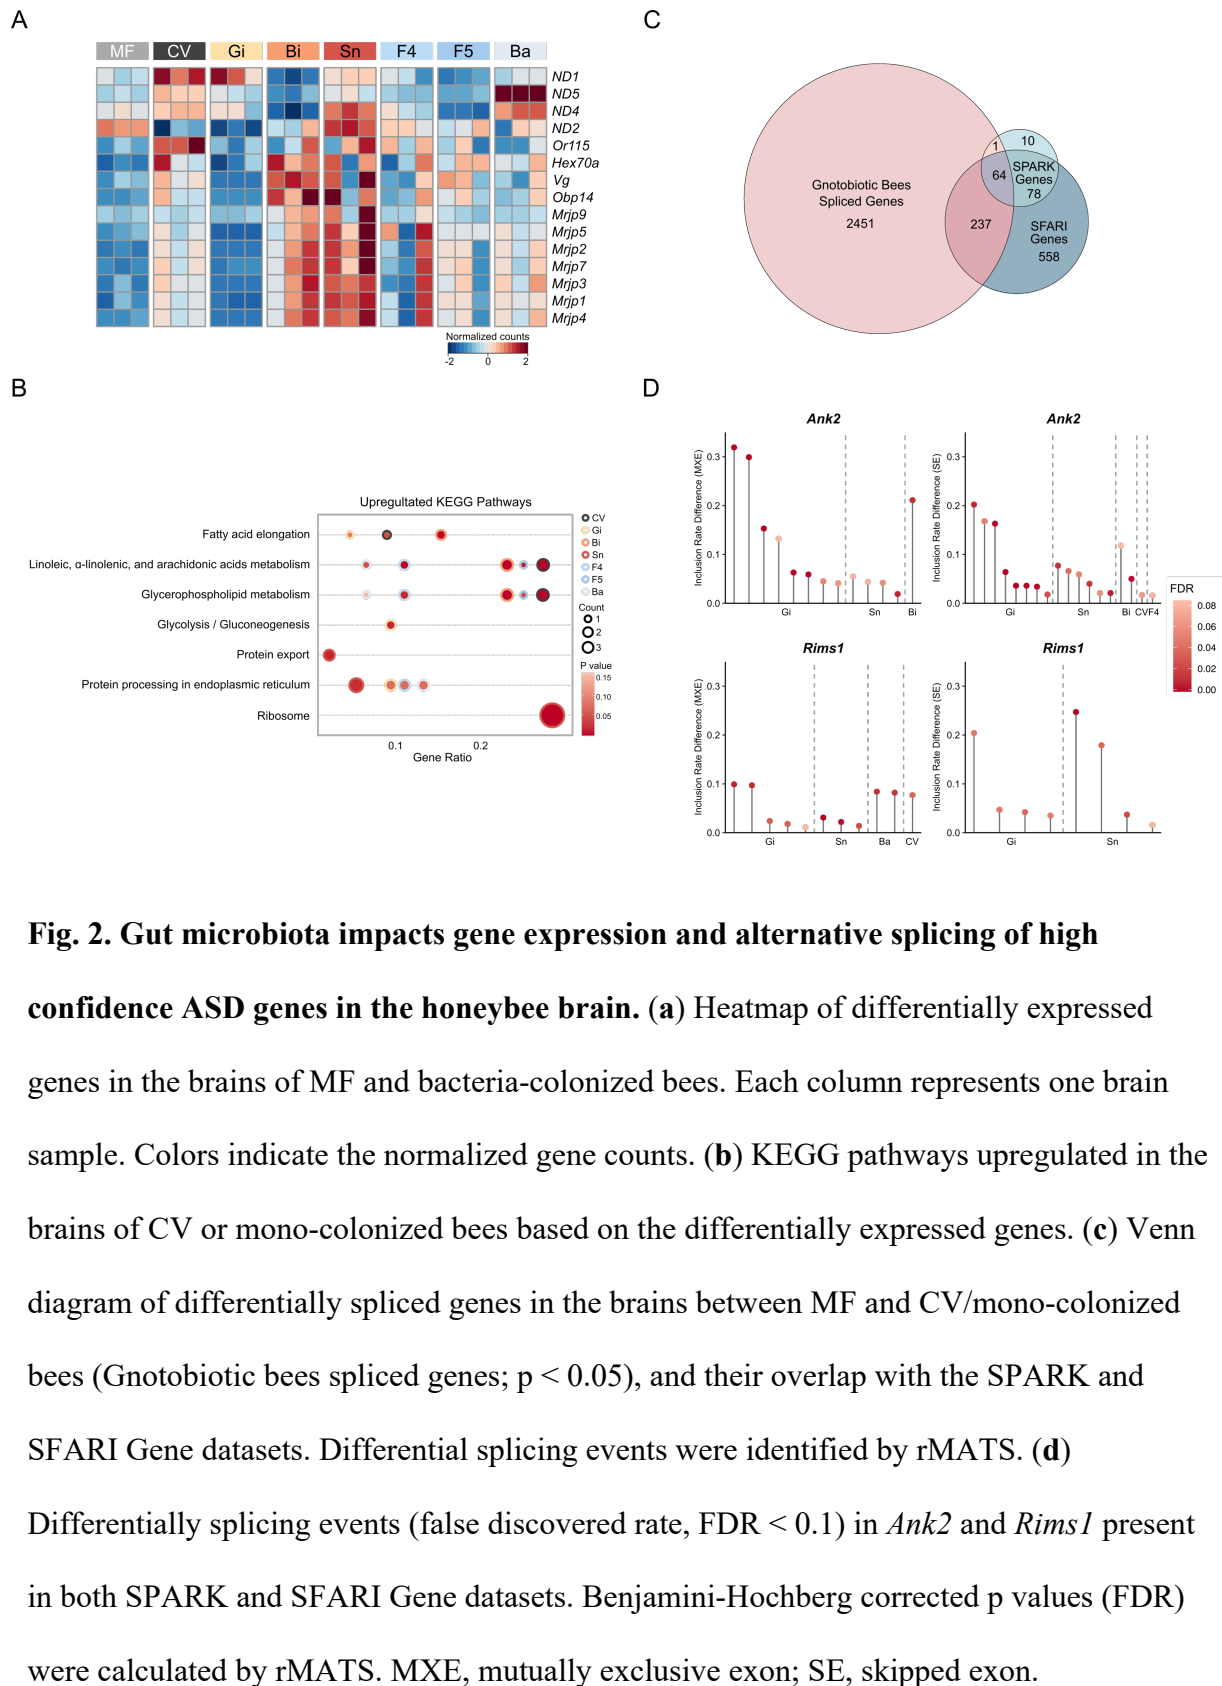

212

213

214

215

216

217

218

219

220

221

222

223

## 224 **Brain proteomics**

225 Olfactory learning and memory behaviors of honeybees can be regulated by several  
226 proteins in the brain through proteomic analysis<sup>40</sup>. An in-depth proteome profile of the  
227 honeybee brain from MF and CV groups identified a total of 3,427 protein counts, 2,845  
228 of which are both detected in MF and CV groups. Three hundred and twenty-two proteins  
229 were only found in MF bees, and 257 were exclusive for CV bees (Fig. 3a, Supplementary  
230 Data 3). Hierarchical cluster analysis of differentially expressed proteins shared by both  
231 groups demonstrated a clear separation between MF and CV bees (Fig. 3b). Notably, the  
232 muscarinic acetylcholine receptor (mAChR) involved in the cholinergic neurotransmitter  
233 system is upregulated in CV bees. mAChR is an acetylcholine binding receptor processing  
234 olfactory signals and plays an important role in the retrieval process of associative and  
235 non-associative learning and the formation of memory<sup>41</sup>, corroborating our findings of  
236 increased memory ability for CV bees (Fig. 1b). We also identified that a splicing factor  
237 U2af28 was upregulated in CV brains, supporting the differential patterns of AS in the  
238 brain. Interestingly, GO enrichment analysis of unique protein in the CV brain identified  
239 that GO terms are related to synaptic neurotransmission and cation/ion transmembrane  
240 transportation (Fig. 3c), which are essential for the fundamental functions in the honeybee  
241 central nervous system<sup>42</sup>.

242

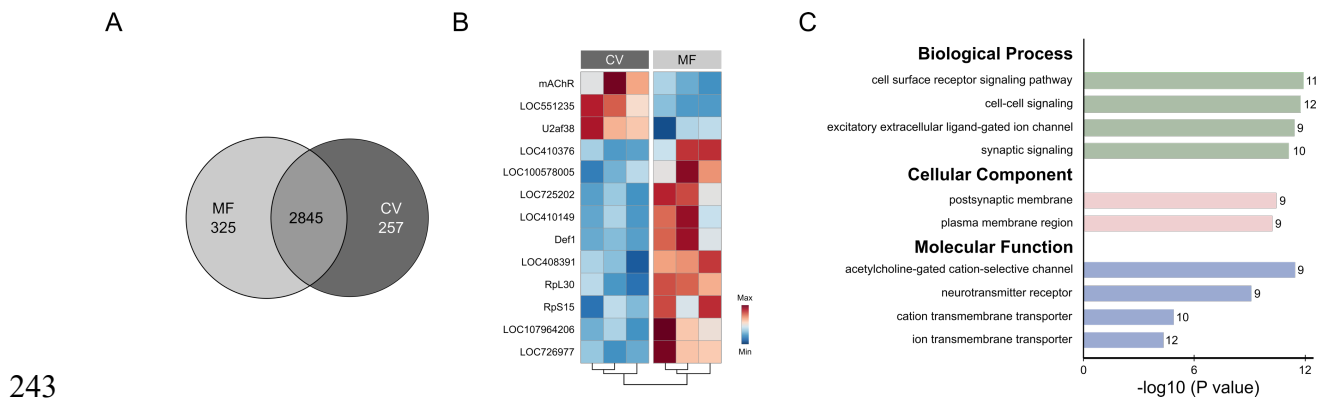

243

244 **Fig. 3. Proteomic profiling revealed upregulated neurotransmission functions in**  
 245 **conventionalized bee brains. (a)** Venn diagrams indicating the numbers of common and  
 246 unique proteins identified in the brains of CV and MF bees. **(b)** Heatmap of differentially  
 247 expressed proteins in the brains of CV and MF bees. **(c)** The most significantly enriched GO  
 248 terms of identified proteins unique to the CV group ( $p < 0.0001$ , one-way ANOVA test). The  
 249 number of genes involved in each GO term is displayed on the bars.

## 250 Circulating metabolomic profiles

251 We have shown that gene expression, splicing, and neuronal function in the brain are  
 252 influenced by the gut community, and these can be regulated by small metabolites in the  
 253 circulatory system<sup>6</sup>. Therefore, we performed quasi-targeted metabolomics analysis of  
 254 hemolymph samples from gnotobiotic bees. In total, 326 metabolites were identified among  
 255 bee groups (Supplementary Data 4), and generally, the metabolic signatures of hemolymph  
 256 samples were significantly different between groups (Fig. 4a, b). Interestingly, GABA and  
 257 acetylcholine together with several amino acids are the most elevated metabolites in CV  
 258 hemolymph (Fig. 4a). Lower levels of 5-HT are found in the hemolymph of bees colonized  
 259 with *Gilliamella* and the gram-positive gut members, which is consistent with our findings  
 260 of the effects on the brain neurotransmitter (Fig. 1d). To associate clusters of highly  
 261 correlated metabolites to particular gut members, we performed the weighted correlation

262 network analysis (WGCNA) based on the interaction patterns among metabolites, and bees  
263 inoculated with different gut microbes were used as the sample trait. WGCNA clustered the  
264 326 metabolites into eight modules (M) (Supplementary Data 5), in which six modules were  
265 significantly correlated with at least one bee group ( $p < 0.01$ ; Fig. 4c). The top two modules,  
266 turquoise M and blue M were both significantly associated with the CV group (Fig. 4d,  
267 Supplementary Fig. 4e), and accordingly, these two modules showed significant correlations  
268 between the metabolite significance and the intra-module connectivity for CV bees  
269 (Supplementary Fig. 4a, b). The major driving metabolites from the turquoise M and blue M  
270 are involved in the metabolism pathways of amino acid, glycerophospholipid, and  
271 carbohydrate (Fig. 4d, Supplementary Fig. 4a, b and e). The black M enriched in amino acid  
272 metabolism and some other compounds were the most correlated module to the F4 and F5  
273 groups (Fig. 4c, d). Moreover, the Gi group was significantly associated with the red M and  
274 pink M, where more metabolites belong to the carbohydrate metabolism pathways (Fig. 4d,  
275 Supplementary Fig. 4c-e). This is consistent with the potential of *G. apicola* for  
276 carbohydrate metabolism in the gut<sup>16,43</sup>.



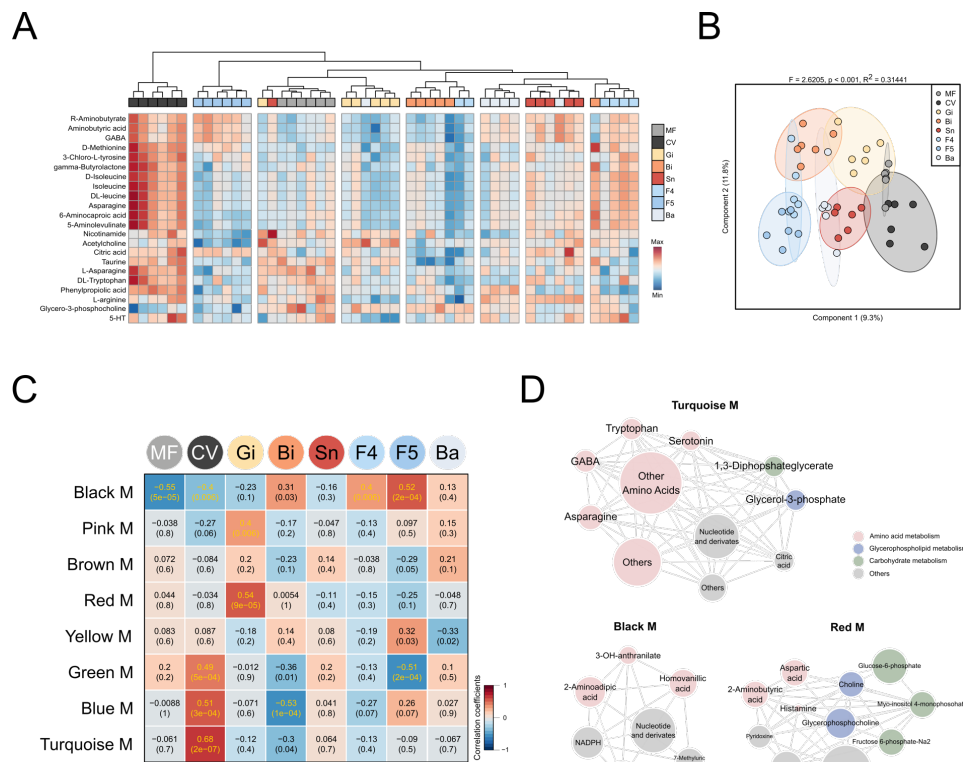

277

278 **Fig. 4. Hemolymph metabolome influenced by different honeybee gut community**  
 279 **members. (a)** Unsupervised hierarchical clustering heatmap of the 22 metabolites that  
 280 contribute most to the separation of different groups in hemolymph samples. **(b)** Sparse  
 281 PLS-DA based on all metabolites detected in the hemolymph of bees. Group differences  
 282 were tested by PERMANOVA. **(c)** Weighted correlation network analysis identified eight  
 283 modules (M) of metabolites highly correlated to different bee groups. Heatmap colors  
 284 indicate the positive/negative Spearman's correlation coefficient. The correlation  
 285 coefficients and p values are both shown within the squares (yellow font indicates  $p < 0.01$ ).  
 286 **(d)** Network diagrams of differential metabolites in the turquoise, black, and red modules  
 287 that are significantly correlated to CV, F4, F5, and Gi groups. Circle colors indicate different  
 288 classes of metabolites in each module, and the size is proportional to the total abundance of  
 289 the metabolites in the modules.

290           Given the evidence that the altered metabolites were largely involved in the metabolic  
291 network of neurotransmitters, we analyzed the differential level of metabolites focusing on  
292 the neurotransmitter metabolic process. Tryptophan (Trp) metabolism mainly controlled by  
293 microbiota follows three major pathways in the gastrointestinal tract: the kynurenine (Kyn)  
294 pathway, the 5-HT production pathway, and the transformation of Trp into indole by gut  
295 microbiota<sup>44</sup>. It showed that 3-indoleacrylic acid (IA), a key component for intestinal  
296 homeostasis<sup>45</sup>, was significantly elevated in the hemolymph of CV and F5 groups. While KA  
297 was not affected, Kyn was reduced in CV bees (Fig. 5). The glutamate metabolism pathway  
298 was mostly regulated in CV, Bi, Sn, and F5 groups (Fig. 5). Although glutamine was only  
299 increased in CV bees, GABA was upregulated in the hemolymph of CV, Sn, and F5 bees,  
300 which agrees with the elevated level of GABA in the brains (Fig. 1f). In addition,  
301 glycerophospholipid metabolism also plays an important role in maintaining positive mental  
302 health<sup>46</sup>. The hemolymph metabolites in glycerophospholipid metabolism were regulated in  
303 the CV, Gi, Sn, F5, and Ba groups compared to the MF group (Fig. 5). Specifically,  
304 acetylcholine associated with the olfactory learning and memory ability in honeybee was  
305 upregulated in the presence of *Gilliamella* (Fig. 5), coinciding with the increased level of  
306 mAChR in the brain (Fig. 3b). These results indicate that neurotransmitter related  
307 metabolisms are regulated by distinctive gut members, which may be a key mechanism of  
308 gut microbiota in modulating the brain functions.

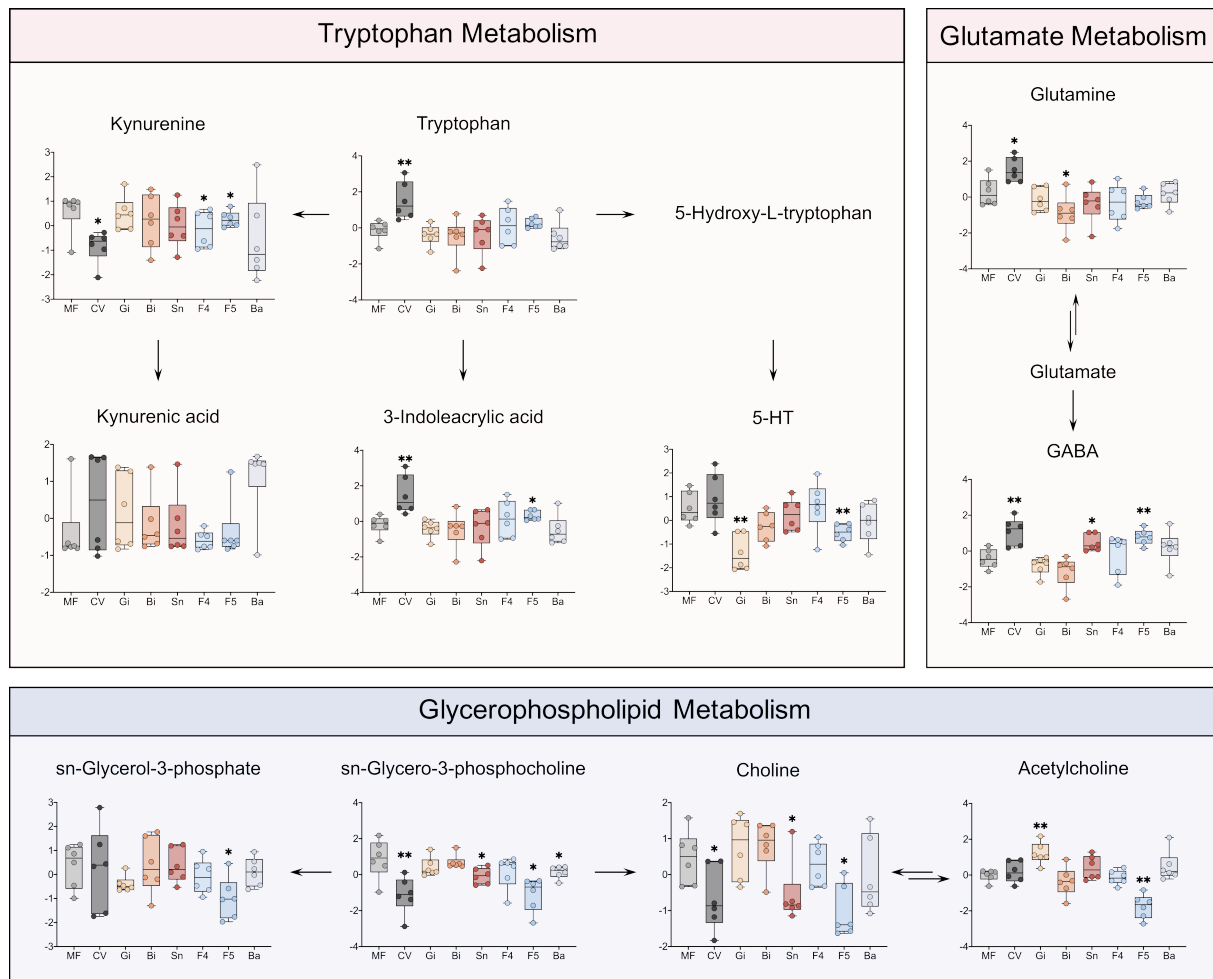

310 **Fig. 5. Disturbance of amino acid and glycerophospholipid metabolism pathways in**  
 311 **honeybees colonized with different gut community members.** Each dot represents the  
 312 normalized concentration of differential hemolymph metabolite mapped into the tryptophan,  
 313 glutamate, and glycerophospholipid metabolism pathways. Differences between MF and the  
 314 other groups were tested by Mann-Whitney *u* test (\**p* < 0.1, \*\**p* < 0.01). Error bars represent  
 315 min and max.

316 **Antibiotic treatment disturbs social behavior via regulating brain transcription and**  
317 **amino acid metabolisms**

318 So far, our results showed that the colonization of different gut bacteria affects the  
319 honeybee behaviors under lab conditions, which is associated with the altered brain gene  
320 expression profiles, as well as the circulating and brain metabolism. We next wondered  
321 whether the perturbation of gut microbiota disturbs bee behaviors under field condition.  
322 Newly emerged bees were labeled with color tags and were then introduced to new hives  
323 with laying queens. After being returned to the hives for one week, colonies were fed wild  
324 honey or tetracycline suspended in wild honey for 5 days (Fig. 6a). The number of capped  
325 brood cells were counted, and post-treatment survival was assessed by counting the number  
326 of remaining marked bees. Although there is an increasing number of capped brood cells in  
327 the control hives, not a single capped brood was observed in the treatment group on Day 17,  
328 18, and 19 (Fig. 6c). However, the number of recovered bees was not significantly different  
329 between control and treatment groups either before (Day 6) or after (Day 13 and 19)  
330 antibiotic treatment (Fig. 6d). Further, developing eggs and larvae were present in the brood  
331 cells of control hives with royal jelly replenished in the bottom, while only few eggs were  
332 observed in the treatment group without hatching during the whole experiment period (Fig.  
333 6b). All these results indicate that antibiotic treatment did not obviously decrease the total  
334 number of adult bees in the hives, but disrupt the behaviors of bees without brood care.  
335 Moreover, antibiotic treatment impacts the gut appearance that the rectums of control groups  
336 are full of yellow pollens, while those of treated nursing bees were more translucent,  
337 suggesting a malnutrition status (Fig. 6b). We further characterized the composition of the  
338 gut community at both phylotype- and SDP-level through metagenomic sequencing.  
339 Although the gut community composition displayed no significant difference at pre-  
340 treatment sampling points, they displayed changes in treated bees and recovery for 7 days

341 (Fig. 6e, Supplementary Fig. 5a). Specifically, the treatment group had a higher fraction of  
342 *Gilliamella*, while the relative abundance of *Bifidobacterium* was reduced. Tetracycline  
343 treatment affected the SDP-level profiles, and the relative abundances of Bifido-1.1, Bifido-  
344 1.2, Firm5-2, and Firm5-3 were reduced in antibiotic-treated samples (Supplementary Fig.  
345 5b-e).

346 Consistent with the findings for gnotobiotic bees, we also identified a differential  
347 profile of brain gene expression for antibiotic-treated bees. The most altered genes belong to  
348 the MRJP, vitellogenin, odorant binding protein, and olfactory receptor families (Fig. 6f).  
349 Remarkably, *Gr10* and *ACSF2* that are both primarily associated with the nursing and brood-  
350 care behavior were significantly reduced by the treatment<sup>47,48</sup>. Additionally, we detected the  
351 differentially abundant metabolites in the gut contents of antibiotic-treated bees from the  
352 field experiment. The metabolomic profiles are clearly distinct between the two groups, and  
353 54 metabolites were significantly different in the gut of treated bees (Fig. 6g, h).  
354 Intriguingly, 5-AV, a GABA<sub>A</sub> receptor agonist affecting inhibitory GABA signaling<sup>49</sup>, is the  
355 most elevated compound in control bees (Fig. 6h, i). Conversely, Kyn is enriched in the gut  
356 of antibiotic-treated bees (Fig. 6h). The Kyn/Trp ratio was increased in the treatment group,  
357 while the ratio of KA/Kyn and the level of IA were decreased (Fig. 6i-k), which confirms the  
358 roles of gut microbiota in the tryptophan metabolism shift (Fig. 5). These results confirm our  
359 hypothesis that the gut microbiota affects honeybee behaviors under field conditions via the  
360 regulation of gut metabolism and gene expression in the brain.

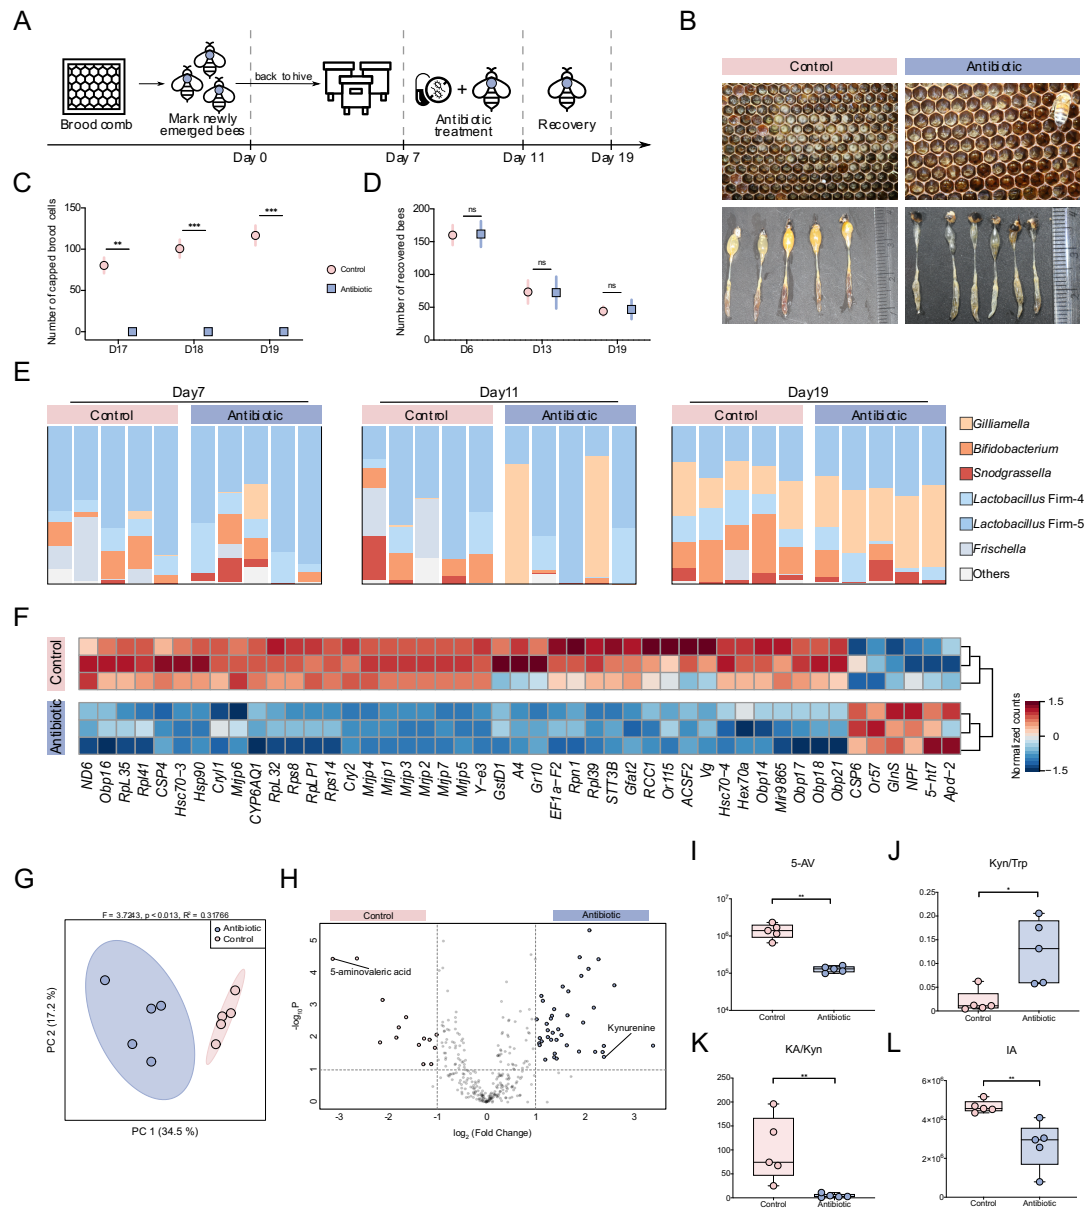

361

362 **Fig. 6. Antibiotic treatment affects honeybee social behaviors via regulating brain**

363 **transcription and amino acid metabolisms.** (a) Schematic of field experiments design for

364 honeybee behavior. Age-controlled bees were treated with tetracycline for 5 days (Day 7–

365 11) in the hive and recovered for 7 days (Day 11–19). (b) Images of brood frames and

366 dissected guts of control and antibiotic-treated groups. (c) Number of capped brood cells

367 during the recovery stage (Day 17, 18, and 19) in three independent colonies of control and

368 antibiotic-treated group, respectively. (d) The number of labelled workers recovered from

369 the hive on Day 6 and 13 in three colonies of each group. Differences between antibiotic-  
370 treated bees and the control group were tested by multiple two-tailed t test with Benjamini-  
371 Hochberg correction (\*FDR < 0.05, \*\*FDR < 0.01, \*\*\*FDR < 0.001). **(e)** Relative  
372 abundance of phylotypes in metagenomic samples from control and antibiotic-treated groups  
373 before the antibiotic treatment (Day 7), at post-treatment (Day 11), and one week after the  
374 recovery (Day 19). **(f)** Heatmap of differentially expressed genes in the brains between  
375 control and antibiotic-treated bees. **(g)** Principal coordinate analysis based on all metabolites  
376 detected in guts of control and antibiotic-treated bees. Group differences were tested by  
377 PERMANOVA. **(h)** Volcano plot showing the differentially regulated metabolites.  
378 Metabolites significantly enriched in control bees are shown in pink, and those enriched in  
379 antibiotic-treated bees are in blue. **(i-l)** Boxplots of **(i)** the kynurenine (Kyn)/tryptophan  
380 (Trp) ratio, **(j)** the kynurenic acid (KA)/kynurenine (Kyn) ratio, the concentration of **(k)** 3-  
381 indoleacrylic acid (IA), and **(l)** 5-aminovaleric acid (5-AV) in the guts of control and  
382 antibiotic-treated bees. Group differences were tested by Mann-Whitney *u* test (\**p* < 0.1, \*\**p*  
383 < 0.01). Data are shown as mean ± SEM **(c-d)**. Error bars represent min and max **(i-l)**.

## 384 Discussion

385 Honeybees are eusocial insects that exhibit complex social, communication, and  
386 navigational behaviors with rich cognitive repertoire, such as color vision, pattern  
387 recognition, as well as learning and memory<sup>50</sup>. Within the colony, honeybees are  
388 characterized by the division of labor, showing striking behavioral and physiological  
389 differences between castes<sup>51</sup>. Although the gut microbiota composition is mostly conserved  
390 in worker bees, it differs in individuals with different behavior and physiology, such as caste,  
391 age, and worker task<sup>52,53</sup>, which suggests that the gut microbiota might be involved in the  
392 behavior of honeybees. While our previous study shows that bee gut microbiota alters the  
393 olfactory sensitivity<sup>14</sup>, the impact of microbiota on more behavioral symptoms has not been  
394 described. We report herein that a conventional gut microbiota is required for the learning  
395 ability and the establishment of memory. Although the olfactory associative learning of  
396 honeybees is largely dependent on the microbiota, the effect of gut bacteria on modulating  
397 bumblebee's visual learning and memory is not clear<sup>54</sup>, suggesting that the mechanism  
398 underpinning the gut-brain interactions differs for social bees, or for olfactory and visual  
399 processing. Notably, we performed the associative appetitive learning assay in this study,  
400 while the aversive learning is also pivotal for bees to escape and avoid predators and  
401 pesticides<sup>55</sup>. Appetitive and aversive olfactory learning are mediated by relatively  
402 independent neural systems. Dopamine is crucial for aversive learning<sup>56</sup>, which is also  
403 regulated by the gut microbiota (Fig. 1e). Further evaluation of microbiota on different  
404 behaviors would assist to fully understand the mechanism of gut-brain interaction.

405 Olfactory and the ability of learning and memory is crucial for honeybees to cope with  
406 individual and social tasks, such as feeding and foraging<sup>57</sup>. Our hive experiments  
407 demonstrate that perturbation of the gut microbiota disturbs the nursing behaviors and no



408 capped brood was observed in antibiotic-treated hives, suggesting a significant role of the  
409 normal gut microbiota in honeybee behaviors within the colony. The number of capped  
410 brood cells is a measure of the colony strength, which could also be influenced by the status  
411 of the egg-laying queen and the colony population size<sup>58</sup>. However, the total number of  
412 individual bees was not obviously reduced, and newly laid eggs were continuously observed  
413 in the treatment hives, implying that the perturbation of gut microbiota affects the normal  
414 hive behaviors of nurse bees and the colony reproduction.

415 By generating single bacterial associations, we intended to dissect the individual and  
416 combined effects of each core gut member in the sugar sensitivity. However, it showed that  
417 only conventionalized bees had a higher sensitivity, and individual gut members were not  
418 sufficient to improve the PER score, suggesting an integrative effect of the gut members,  
419 which is also reported for the *Drosophila* microbiota on the host learning<sup>59</sup>. Under field  
420 conditions, antibiotic treatment did not completely eliminate any core gut species but  
421 perturbed the relative abundance of the SDPs of *Lactobacillus* Firm-5 and *Bifidobacterium*,  
422 which indicates that the normal microbial community structure is required for the colony  
423 health. It has been shown that antibiotic exposure impacts bee health and dramatically  
424 reduced the survival rate with dysbiosis on the relative abundance of different bacterial  
425 genera and the fine-scale genetic diversity of the gut community<sup>60</sup>. In addition to the  
426 increased susceptibility to ubiquitous opportunistic pathogens<sup>61</sup>, the colony losses resulting  
427 from antibiotic treatment could be partly due to the altered hive behaviors.

428 Our RNA-seq analysis of gnotobiotic bee brains showed that numerous transcripts  
429 differed in expression levels, moreover, genes related to honeybee labor division and  
430 olfactory ability were altered by gut bacteria. For example, genes encoding the MRJPs  
431 involved in the learning and memory abilities of honeybees were upregulated in bacteria-  
432 colonized bees. Consistently, it has been reported that the expression level of *mrjp1* and

433 *mrjp4* are repressed in the brains of imidacloprid treated bees, which also exhibit impaired  
434 learning<sup>27</sup>. The expression level of *Vg* was disturbed by gut microbiota in both laboratory  
435 experiments and in the hive, corroborating with the previous finding in MF bee abdomen<sup>14</sup>.  
436 Vitellogenin is a nutritional status regulator that influences honeybee social organization and  
437 stress resilience<sup>62</sup>. The expression of *Vg* and survivorship could be elevated by the addition  
438 of pollen to the diet<sup>63</sup>, whereas the effect is alleviated by the disturbance of gut community<sup>64</sup>,  
439 indicating the important role of gut microbiota in *Vg* regulation via the nutritional  
440 metabolism.

441 Homologous molecular mechanism in social responsiveness has been documented  
442 between honeybee and human<sup>34</sup>. The transcription profile in brains of bees with disordered  
443 social behaviors is distinct from that of normal bees, and differently expressed genes in  
444 unresponsive individuals are enriched for human ASD-related genes. These genes are also  
445 found associated with the polymorphism of the halictid bee *Lasioglossum albipes*, indicating  
446 their implications in social behaviors<sup>65</sup>. Despite the disturbed gene expression level, AS  
447 patterns of the ASD-related genes are also highly correlated to mental disorders<sup>7</sup>. In our  
448 dataset, the analysis of gene splicing identified extensive differences among bacteria-  
449 colonized groups of bees, and the altered genes compared to MF bees largely overlapped  
450 with the SPARK and SFARI gene datasets for Autism (Fig. 2). The MXE and SE events of  
451 two high-confidence ASD risk genes, *Ank2* and *Rims1*, were predominantly affected by the  
452 gut bacteria. These two genes are also found affected in the brains of mice colonized by  
453 ASD-human gut microbiota<sup>7</sup>. Correspondingly, our brain proteomics revealed that the  
454 splicing factor was upregulated in CV brains, supporting the contribution of microbiota to  
455 splicing regulation. All these findings demonstrate a deep conservation for genes related to  
456 social responsiveness of human and distantly related insect species, and reflect a common  
457 role of the gut microbes implicated in the evolution of sociality<sup>66</sup>.

458            Neurotransmitters that carry and pass information between neurons are essential for  
459 brain functions, which are important modulators of behaviors. In honeybees, four  
460 monoamine neurotransmitters play important roles in learning and memory<sup>22</sup>, and olfactory  
461 sensitivity<sup>22,23</sup>. In addition, GABA and acetylcholine have been physiologically  
462 characterized to induce currents between neurons within the olfactory pathways and  
463 contribute to the odor memory formation<sup>42</sup>. Concentrations of most identified  
464 neurotransmitters were regulated by different gut members, corroborating with the roles of  
465 gut microbiota in the altered behaviors in the lab and hive experiments. Alternatively, it  
466 recently shows that nestmate recognition cues are defined by gut bacteria, possibly by  
467 modulating the host metabolism or by the direct generation of the colony-specific blends of  
468 cuticular hydrocarbon<sup>67</sup>. In leaf-cutting ants and termites, gut microbiota suppression by  
469 antibiotics also influences the recognition behavior toward nestmates, which may be directed  
470 by the bacterial metabolites as recognition cues in the feces<sup>68,69</sup>. Nevertheless, the effect of  
471 gut community is mainly driven by the microbial metabolism, specifically the amino acid  
472 and lipid metabolic pathways, which can further influence the circulation system and the  
473 synthesis of neuroactive molecules of the host. Perturbation in gut tryptophan metabolism  
474 has been associated with neuropsychiatric disorders in human and *Drosophila* model,  
475 characterized by reduced plasma level of tryptophan<sup>70</sup>, high IDO1 activity<sup>71</sup>, and high level  
476 of 5-HT in brains<sup>72</sup>. In honeybees, 5-HT was also elevated in MF bee brains compared to  
477 bacteria-colonized counterparts, moreover, the level of IDO1 activity (assessed by Kyn/Trp  
478 ratio) was higher in the gut of antibiotic-treated bees in the field colony. In addition,  
479 acetylcholine synthesized in the glycerophospholipid pathway is a neurotransmitter crucial  
480 for the olfactory learning and memory ability in honeybees. Our results revealed that gut  
481 microbiota mediated the cholinergic metabolism in the hemolymph, and correspondingly,  
482 the brain proteomics showed an increased level of the muscarinic acetylcholine receptor in  
483 CV bees. Cholinergic signaling via the mAChR is critical for the olfactory associative

484 learning and foraging behaviors<sup>41</sup>. Moreover, the stimulation of the mAChR of honeybee  
485 increases the volume of the mushroom body neuropil, which mimics the reinforcement of  
486 cholinergic neurotransmission in foraging bees<sup>73</sup>. A reduced mushroom body calycal growth  
487 is also associated with lower learning performance in bumblebees through micro-computed  
488 tomography scanning<sup>74</sup>. It would be interesting to investigate whether gut microbes impact  
489 the structural changes of the brain in future studies.

490 It is increasingly realized that gut microorganisms may influence the development of  
491 social behaviors across diverse animal hosts<sup>66</sup>. While hypothesis-generating, translating  
492 these correlations into actionable outcomes is challenging in humans. Honeybees are  
493 colonial and highly social with multiple symbolic behaviors, which offer an experimental  
494 tool to investigate the relationship between the microbiota and host brain functions and help  
495 to uncover the causal mechanisms underlying sociability. Our study highlights multiple  
496 parallels between honeybee and human that gut microbiota plays an important role in host  
497 brain functions. The development of genetic tools manipulating both the bee host and the gut  
498 bacteria would facilitate the investigation of the molecular basis of host-microbe interactions  
499 via the gut-brain axis<sup>75,76</sup>.

## 500 **Methods**

### 501 **Generation of microbiota-free, mono-colonized and conventionalized honeybees**

502 Microbiota-free (MF) bees were obtained as described by Zheng *et al.*<sup>16</sup> with modifications.  
503 Late-stage pupae were removed manually from brood frames and placed in sterile plastic  
504 bins. The pupae emerged in an incubator at 35°C, with humidity of 50%. Newly emerged  
505 MF bees (Day 0) were kept in axenic cup cages with sterilized sucrose syrup (50%, wt/vol)  
506 for 24 h and divided into three groups: 1) MF, 2) mono-colonized (MC) and 3) conventional  
507 (CV) bees. For each setup, 20–25 MF bees (Day 1) were placed into one cup cage, and the  
508 bees were feeding on the corresponding solutions or suspensions for 24 h. For the MF group,  
509 1 mL of 1×PBS was mixed with 1 mL of sterilized sucrose solution (50%, wt/vol) and 0.3 g  
510 sterilized pollen. For the MC group, stocks of *Gilliamella apicola* (W8127), *Snodgrassella*  
511 *alvi* (W6238G3), *Bifidoobacterium asteroides* (W8113), *Bartonella apis* (B10834G6),  
512 *Lactobacillus* sp. Firm-4 (W8089), and *Lactobacillus* sp. Firm-5 (W8172) in 25% glycerol  
513 stock at –80°C were resuspended in 1mL 1×PBS (Solarbio, Beijing, China) at a final  
514 OD<sub>600nm</sub> of 1, and then mixed with 1 mL sterilized sucrose solution (50%, wt/vol) and 0.3 g  
515 sterilized pollen. For the CV group, 5 µL homogenates of freshly dissected hindguts of nurse  
516 bees from their hives of origin were mixed with 1 mL 1×PBS, 1 mL sterilized sucrose  
517 solution (50%, wt/vol) and 0.3 g sterilized pollen. Then MF, MC, and CV bees were  
518 provided sterilized sucrose (0.5 M) with sterile pollens and kept in an incubator (35°C, RH  
519 50%) until day 7. Brains, guts, and hemolymph of bees were collected on day 7 for further  
520 analysis.

### 521 **Bacterial load quantification**

522 Colonization levels of MF and MC bees were determined by colony-forming units from  
523 dissected guts, as described by Kwong *et al.*<sup>77</sup>. Colonization levels of CV bees were  
524 determined by quantitative PCR as previously described by Engel *et al.*<sup>13</sup>. All qPCR  
525 reactions were carried out in a 96-well plate on the StepOnePlus Real-Time PCR system  
526 (Applied Biosystems; Bedford, MA, USA) with the thermal cycling conditions as follows:  
527 denaturation stage at 50°C for 2 min followed by 95°C for 2 min, 40 amplification cycles at  
528 95°C for 15 s, and 60°C for 1 min. Melting curves were generated after each run (95°C for  
529 15 s, 60°C for 20 s and increments of 0.3°C until reaching 95°C for 15 s) to compare  
530 dissociation characteristics of the PCR products obtained from gut samples and positive  
531 control. Each reaction was performed in triplicates on the same plate in a total volume of 10  
532 µl (0.2 µM of each forward and reverse primer; and 1x SYBR® Select Master Mix, Applied  
533 Biosystems; Bedford, MA, USA) with 1 µl of DNA or cDNA (to assess virus loads). Each  
534 plate contained a positive control and a water control. After the calculation of the bacterial  
535 16S rRNA gene copies, normalization with the actin gene was carried out to reduce the  
536 effect of gut size variation and extraction efficiency. In brief, bacterial 16S rRNA gene  
537 copies were normalized to the medium number of actin gene copies by dividing by the ‘raw’  
538 copy number of actin for the given sample and multiplying by the median number of actin  
539 gene copies across all samples. Universal bacteria primers (Forward: 5’ -  
540 AGGATTAGATACCCTGGTAGTCC-3’, Reverse: 5’- YCGTACTCCCCAGGCGG-3’)<sup>13</sup>  
541 and *Apis mellifera* actin (Forward: 5’ - TGCCAACACTGTCCTTTCTG -3’, Reverse: 5’-  
542 AGAATTGACCCACCAATCCA -3’)<sup>78</sup> were used here.

### 543 **Tissue collection**

544 The whole guts were dissected by tweezers disinfected with 75% alcohol. Dissected guts  
545 were directly crushed in 25% (vol/vol) glycerol on ice for bacterial load quantification or  
546 collected into an empty 1.5-mL centrifuge tube for metagenomic sequencing and

547 metabolomics analysis. All gut samples were frozen at  $-80^{\circ}\text{C}$  until analysis. Honeybee  
548 brains were collected using a dissecting microscope (Canon). Individual bee was fixed on  
549 beeswax using two insect needles through the thorax. After removing the head cuticle, the  
550 whole brain was placed on a glass slide and soaked in RNAlater (Thermo; Waltham, MA,  
551 USA) or proteinase inhibitor (Roche; Mannheim, Germany) for gene expression profiling,  
552 proteome analysis, and neurotransmitters concentration quantification. Then hypopharygeal  
553 glands, salivary glands, three simple eyes, and two compound eyes were carefully removed.  
554 Dissected brains were kept frozen in  $-80^{\circ}\text{C}$ . Hemolymph was collected using a 10  $\mu\text{L}$   
555 pipettor (Eppendorf; Hamburg, Germany) from the incision above the median ocellus. A  
556 minimum of 50  $\mu\text{L}$  of hemolymph was collected from 10 bees into a 1.5-mL centrifuge tube.  
557 During the collection process, tubes are temporarily preserved on dry ice and subsequently  
558 stored at  $-80^{\circ}\text{C}$  until analysis.

## 559 **In laboratory honeybee behavior experiment**

### 560 **Learning and memory**

561 We measured the olfactory learning and memory ability of seven-day-old MF, CV, and  
562 CV+tet bees. MF and CV bees were generated as described above. CV+tet bees were fed 450  
563  $\mu\text{g}/\text{ml}$  (final concentration) of tetracycline suspended in sterilized 0.5 M sucrose syrup on Day  
564 5 after the eclosion for 24 h and then were fed sucrose syrup for another 24 h for recovery.  
565 Experiments of olfactory learning and memory were performed as previously described<sup>20,79</sup>  
566 with modifications (Fig. 1a). In brief, bees were starved for 2 h by removing sugar syrup and  
567 bee bread from the cup cage before the test and were then mounted to modified 0.8 mm wide  
568 bullet shell with sticky tape restraining harnesses (Supplementary Movie 1). The whole  
569 experiment was performed in a room with a stable light source at room temperature. Each bee  
570 individual was checked for their intact proboscis extension response by touching the antennae

571 with 50% sucrose solution without subsequent feeding 15 min before the experiment.  
572 Nonanol (olfactory learning; Sigma-Aldrich; Saint Louis, MO, USA) and hexanal (negative  
573 control; Macklin; Shanghai, China), which could be distinguished by honeybee<sup>80</sup>, were used  
574 as odor sources. The odor was produced by pricking holes on a 0.8 cm wide filter paper and  
575 soaking it in 0.5 mL nonanol or hexanal, and the filter paper was then slipped into a 10 mL  
576 injector. During conditioning, individual harnessed bee was placed in front of an exhaust fan  
577 to prevent odor build-up in subsequent experiments. Bees were trained for 10 trials with an  
578 inter-trial interval of 10 min to associate nonanol odor as conditioned stimulus with a reward  
579 of 50% sucrose solution as unconditioned stimulus.

580 At the beginning of each trial, the harnessed bee was placed inside the arena for 5 sec to  
581 allow familiarization with the experimental context. Thereafter, the nonanol odor was  
582 presented before its antennal for 6 sec, and then 0.4 uL droplet of sucrose solution was  
583 delivered to the bee using a syringe needle, which directly touched the proboscis to evoke  
584 PER. Once the 10 trials of a conditioning session were completed, bees were kept in the dark  
585 without being fed for 3 h. Two unreinforced olfactory memory tests were administered 3 h  
586 after olfactory conditioning: one with the conditioned stimulus odor (nonanol) and one with  
587 a novel odor (hexanal). The order of presentation was randomized across subjects. A clean  
588 and tasteless injector was delivered to the bee after each odor test to exclude visual memory  
589 of reward during olfactory conditioning. Bees only extending the proboscis to nonanol odor  
590 were considered as successful memorized individuals (Fig. 1a).

### 591 **Gustatory responsiveness**

592 Seven-day-old MF, MC, and CV bees were used to measure the response to different  
593 concentrations of sucrose solution as previously described with some modifications<sup>14</sup>. Before  
594 the test, bees were starved for 2h in the incubator by removing sugar syrup and bee bread



595 from the cup cage. Bees were then mounted to modified 2.0-mL centrifuge tubes using  
596 Parafilm M (Bemis; Sheboygan Falls, WI, USA), and they could only move their heads and  
597 propodeum for antennae sanitation. Individual responsiveness was measured by presenting a  
598 series concentration of sucrose solutions (0, 0.1, 0.3, 1, 3, 10, and 30%; wt/vol) to the  
599 antennae of bees<sup>81</sup>. Before each sucrose solution presentation, all bees were tested for their  
600 response to pure water in order to control for the potential effects of repeated sucrose  
601 stimulations that may lead to either sensitization or habituation<sup>82</sup>. The inter-stimulus interval  
602 between water and sucrose solution was 4 min. When a bee's antenna is stimulated with a  
603 sucrose solution of sufficient concentration, the bee reflexively extends its proboscis. The  
604 lowest sucrose concentration at which an individual responded by extending its proboscis  
605 was recorded and interpreted as its sugar response threshold. At the end of the experiment, a  
606 gustatory response score was obtained for each bee, which is based on the number of sucrose  
607 concentrations to which the bees responded. The response was arbitrarily quantified with  
608 scores from 1 to 7, where 1 represented a bee that only responded to the highest sucrose  
609 concentration, while a score of 7 represented an individual that responded to all  
610 concentrations tested. If a bee failed to respond in the middle of a response series, this  
611 'failed' response was considered to be an error and the bee was deemed to have responded to  
612 that concentration as well. Bees that did not respond to any of the sucrose concentrations  
613 were excluded from further analyses. In addition, bees that responded to all concentrations of  
614 sucrose solutions and all presentations of water were also excluded as they appeared not to  
615 be able to discriminate between sucrose and water<sup>82</sup>.

## 616 **Hive behavior experiment**

617 The fieldwork took place in 2019 at the apiary of China Agricultural University,  
618 Beijing, China, and the experiment was performed twice in July and August, respectively.  
619 To observe the effect of gut microbiota on the hive bee behaviors with the same age, two

620 independent single-cohort colonies were set up as previously described<sup>83</sup>. Briefly, brood  
621 frames were collected from a single hive and adult bees were brushed off. The frames were  
622 then kept in the laboratory incubating at 35°C and 50% relative humidity. In two days, about  
623 1,000 bees emerged from each frame in the incubator, and we labeled 300 individuals with  
624 colored tags on their thorax. All newly emerged bees were then introduced to new empty  
625 hives together with a newly mated laying queen<sup>84</sup>. Two hives for control and treatment were  
626 established. Control colony bees were fed wild honey along with the whole experiment, and  
627 treatment groups were fed wild honey suspended with 450 ug/ml of tetracycline (final  
628 concentration) from Day 7 after the establishment of hives (Fig. 6a), and the antibiotic  
629 treatment lasted for 5 days. The number of capped brood cells was counted every day, and  
630 post-treatment survival in the hive was assessed by counting the number of remaining  
631 marked bees of the whole hive<sup>61</sup>. Marked bees for both control and treatment groups were  
632 collected from each hive at time points of 7, 11, and 19 day following the set-up of hives,  
633 and the hind guts and brain tissue were dissected. All samples were stored at -80 °C until  
634 analysis.

### 635 **Gut DNA extraction and metagenomic sequencing**

636 Bee individuals of either control or antibiotic groups were sampled on day 7, 11, and 19  
637 during the hive behavior experiment (Fig. 6a). Total genomic DNA of the gut microbiota  
638 was extracted from the whole gut homogenate using CTAB method as previously  
639 described<sup>14</sup>. DNA samples were sent to Novogene Bioinformatics Technology Co. Ltd.  
640 (Beijing, China) for shotgun metagenome sequencing. Sequencing libraries were generated  
641 using NEBNext Ultra<sup>TM</sup> II DNA Library Prep Kit for Illumina (New England Biolabs;  
642 Ipswich, MA, USA), and the library quality was assessed on Qubit 3.0 Fluorometer (Life  
643 Technologies; Grand Island, NY, USA) and Agilent 4200 (Agilent, Santa Clara, CA) system.  
644 The libraries were then sequenced on the Illumina Novaseq 6000 platform (Illumina; San

645 Diego, CA, USA) and 150 bp paired-end reads were generated. The SDP- and phylotype-  
646 level community structure of each metagenomic sample was profiled following the  
647 Metagenomic Intra-Species Diversity Analysis System (MIDAS) pipeline<sup>85</sup>. A custom bee  
648 gut bacteria genomic database was generated based on 407 bacterial isolates from honeybees  
649 and bumblebees (Supplementary Data 6). Before the classification, we removed reads  
650 belonging to the honeybee reference genome (version Amel\_HAv3.1) using KneadData v  
651 0.7.3. We then ran the ‘species’ module of the ‘run\_midias.py’ and ‘merge\_midias.py’ scripts  
652 in MIDAS with our custom bacterial genome database, which aligned reads to universal  
653 single-copy gene families of phylogenetic marker genes using HS-BLASTN to estimate the  
654 abundance of phylotypes and SDPs for each sample. Local alignments that cover < 70% of  
655 the read or fail to satisfy the gene-specific species-level percent identity cut-offs were  
656 discarded.

### 657 **Brain gene expression analysis**

658 Total RNA was extracted from individual brains using the Quick-RNA MiniPrep kit (Zymo;  
659 Irvine, CA, USA). RNA degradation and contamination were monitored on 1% agarose gels,  
660 and the purity was checked with the NanoPhotometer spectrophotometer (IMPLEN; CA,  
661 USA). RNA integrity was assessed using the RNA Nano 6000 Assay Kit of the Bioanalyzer  
662 2100 system (Agilent Technologies; Santa Clara, CA, USA). RNA sequencing libraries were  
663 generated using NEBNext Ultra RNA Library Prep Kit for Illumina (New England BioLabs;  
664 Ipswich, MA, USA) and index codes were added to attribute sequences to each sample. The  
665 clustering of the index-coded samples was performed on a cBot Cluster Generation System  
666 using TruSeq PE Cluster Kit v3-cBot-HS (Illumina; San Diego, CA, USA), and the library  
667 preparations were then sequenced on an Illumina NovaSeq 6000 platform (Illumina; San  
668 Diego, CA, USA) and 150 bp paired-end reads were generated. Sequencing quality of  
669 individual samples was assessed using FastQC v0.11.5 with default parameters. An index of

670 the bee reference genome (Amel\_HAv3.1) was built using HISAT2 v2.0.5<sup>86</sup>, and the FastQC  
671 trimmed reads were then aligned to the built index using HISAT2 v2.1.0 with default  
672 parameters. Gene expression was quantified using HTSeq v0.7.2<sup>87</sup> with mode ‘union’, only  
673 reads mapping unambiguously to a single gene are counted, whereas reads aligned to  
674 multiple positions or overlapping with more than one gene are discarded. If it were counted  
675 for both genes, the extra reads from the differentially expressed gene may cause the other  
676 gene to be wrongly called differentially expressed, so we chose ‘union’ mode.

677 Differential gene expression analysis was performed using the DESeq2 package<sup>88</sup> in R.  
678 We modeled read counts following a negative binomial distribution with normalized counts  
679 and dispersion. The proportion of the gene counts in the sample to the concentration of  
680 cDNA was scaled by a normalization factor using the median-of-ratios method. The  
681 variability between replicates is modeled by the dispersion parameter using empirical Bayes  
682 shrinkage estimation. For each gene, we fit a generalized linear model to get the overall  
683 expression strength of the gene and the log 2-fold change between CV, MC, and MF groups.  
684 For significance testing, differential gene expression is determined by the Wald test. The  
685 resulting p-values were corrected for multiple comparisons using the Benjamini-Hochberg  
686 FDR method<sup>89</sup>. Genes with an adjusted P-value < 0.05 and  $|\log_2\text{FoldChange}| > 1$  were  
687 assigned as differentially expressed.

688 To get a better annotation of the honeybee reference genome, we re-annotate it using  
689 eggNOG-mapper v5.0<sup>90</sup>. 6,269 out of 12,375 honeybee genes were successfully assigned to  
690 a KO entry with the ‘diamond’ mode, and the hierarchy information of the KEGG metabolic  
691 pathway was extracted. Functional analysis of differentially expressed genes was performed  
692 based on KEGG Orthologue (KO) markers. The percentages of KO markers belong to each  
693 category (KEGG Class at level 3) out of total MC-, CV-, and MF-enriched KO markers were

694 designated as a comparison parameter. The significance level was calculated by Fisher's  
695 exact test using clusterProfiler v3.10.1<sup>91</sup>.

696 Analysis of event-level differential splicing was performed using rMATS v4.0.2<sup>92</sup>  
697 based on the bee reference genome. An exon-based ratio metric, commonly defined as  
698 percent-spliced-in value, was employed to measure the alternative splicing events. The  
699 percent spliced in (PSI) value is calculated as follows:

$$700 \quad \varphi = \frac{\frac{I}{l_I}}{\frac{I}{l_I} + \frac{S}{l_S}}$$

701 , where S and I are the numbers of reads mapped to the junction supporting skipping  
702 and inclusion form, respectively. Effective length  $l$  is used for normalization. The PSI value  
703 was calculated for several classes of alternative splicing events, including skipped exon  
704 (SE), alternative 5' splice site (A5SS), alternative 3' splice site (A3SS), mutually exclusive  
705 exons (MXE), and retained introns (RI). Events with  $p < 0.05$  were considered differentially  
706 spliced across gnotobiotic bees and microbiota-free bees.

707 To find the overlaps between the differentially expressed or spliced genes of bee brain  
708 and those from humans autism spectrum disorders, a total of 3,531 high-quality reference  
709 protein sequences corresponding to 948 known autism risk genes (SFARI:  
710 <https://gene.sfari.org/>, SPARK for Autism: [http://spark-](http://spark-sf.s3.amazonaws.com/SPARK_gene_list.pdf)  
711 [sf.s3.amazonaws.com/SPARK\\_gene\\_list.pdf](http://spark-sf.s3.amazonaws.com/SPARK_gene_list.pdf)) were aligned against the protein sequences of  
712 honeybee genome using BLASTP<sup>93</sup> with two-way best matching strategy. In total, 649  
713 autism protein sequences obtained a match (Similarity > 30% and e-value < 0.000394). Then  
714 we calculated the intersection of the autism risk genes and the differentially expressed or  
715 spliced genes between bacteria colonized bees and MF bees ( $p < 0.05$ ).

## 716 **Brain proteome analysis.**

717 The proteome analysis was performed as described by Meng *et al.*<sup>94</sup>. Briefly, three replicates  
718 per treatment group were analyzed for each group of bees. 20 dissected honeybee brains  
719 were pestle ground, sonicated, and cooled on ice for 30 min in a lysis buffer (8 M urea, 2 M  
720 thiourea, 4% 3-((3-cholamidopropyl) dimethylammonio)-1-propanesulfonate acid (CHAPS),  
721 20 mM tris-base, 30 mM dithiothreitol (DDT)). The homogenate was centrifuged at 12,000 g  
722 and 4 °C for 15 min, followed by supernatant recovery. Then 4 volumes of ice-cold acetone  
723 were added for 30 min to precipitate protein. The protein pellets were collected after  
724 centrifugation (8,000g, 4°C for 15 min), then dried at room temperature, and dissolved in 40  
725 mM NH<sub>4</sub>HCO<sub>3</sub>. To prevent reformation of disulfide bonds, the dissolved protein samples  
726 were incubated with 100 mM of DDT (DDT/protein (V: V=1:10)) for 1 h and then alkylated  
727 with 50 mM of iodoacetamide (IAA) (DDT/IAA (V: V=1:5)) for 1 h in the dark. Finally, the  
728 resultant protein was digested with trypsin (enzyme: protein (W: W=1:50)) at 37°C for 14 h.  
729 After digestion, the enzymatic reaction was stopped by adding 1 µL of formic acid into the  
730 mixture. The digested peptides were centrifuged at 13,000g and 4°C for 10 min. The  
731 supernatant was recovered and extracted using a SpeedVac system (RVC 2-18, Marin Christ;  
732 Osterod, Germany) for subsequent LC-MS/MS analysis.

733 Peptides were measured by the EASY-nLC 1000 liquid chromatograph (Thermo Fisher  
734 Scientific, Waltham, MA, USA) on a Q Exactive HF mass spectrometer (Thermo Fisher  
735 Scientific). Peptides were separated on an analytical column packed with 2 µm Aqua C18  
736 beads (15cm long, 50 µm inner diameter, Thermo Fisher Scientific) at a flow rate of 350  
737 nL/min, using a 120-min gradient (2% (vol/vol) to 10% (vol/vol) acetonitrile with 0.1%  
738 (vol/vol) formic acid). The Q Exactive was operated in the data-dependent mode with the  
739 following settings: 70000 resolution, 350–1,600 *m/z* full scan, Top 20, and a 2 *m/z* isolation  
740 window. Identification and label-free quantification of peptides were done with PEAKS

741 Studio X+ (Bioinformatics Solutions Inc.; Waterloo, ON, Canada) against the sequence  
742 database (21,780 protein sequences of *Apis mellifera*), coupled with a common repository of  
743 adventitious proteins database (cRAP, [https://www.thegpm.org/dsotw\\_2012.html](https://www.thegpm.org/dsotw_2012.html)). The  
744 search parameters were: parent ion tolerance, 15 ppm; fragment tolerance, 0.05 Da; enzyme,  
745 trypsin; maximum missed cleavages, 3; fixed modification, carbamidomethyl (C, +57.02  
746 Da); and variable modification, oxidation (M, +15.99 Da). A protein was confidently  
747 identified only if it contained at least one unique peptide with at least two spectra, applying a  
748 threshold of false discovery rate (FDR)  $\leq 1.0\%$  by a fusion-decoy database searching  
749 strategy (PMID: 22186715). Proteins significantly differential between groups were  
750 identified using ANOVA (p-value  $< 0.05$  and a fold change of  $\geq 1.5$ ).

751 The functional gene ontology (GO) term and pathway were assessed using  
752 ClueGOv2.5.5, Cytoscape plug-in software (<http://www.ici.upmc.fr/cluego/>). The analysis  
753 was performed by comparing an input data set of identified proteins to all functionally  
754 annotated GO categories in the entire genome of *Apis mellifera* from UniProt. The  
755 significantly enriched GO terms in cellular component (CC), molecular function (MF),  
756 biological processes (BPs) and pathways were reported using a two-sided hyper-geometric  
757 test and only a p-value  $\leq 0.05$  was considered. Then, Bonferroni step-down was used to  
758 correct the p-value to control FDR. Functional grouping of the terms was based on the GO  
759 hierarchy. The tree level was ranged from 3 to 8, and the kappa score level was 0.4.

#### 760 **Targeted metabolomics for brain neurotransmitters.**

761 Brain tissues dissected from MF, MC, and CV bees were sent to Biotree Biotech Co. Ltd.  
762 (Shanghai, China) for targeted metabolomics analysis of dopamine, octopamine, serotonin,  
763 tyramine, and GABA. Six brain tissues from one treatment group were put into one tube and  
764 centrifuged (2400 g  $\times$  1 min at 4 °C). 100  $\mu$ L acetonitrile containing 0.1% formic acid and

765 20  $\mu$ L ultrapure water were added and the tubes were vortexed thoroughly. Metabolites were  
766 sonicated in an ice-water bath for 30 min, followed by subsiding at -20 °C for 2 h.  
767 Supernatants were collected after centrifugation (14,000 g  $\times$  10 min at 4 °C). 20  $\mu$ L of  
768 supernatant were transferred to a new vial followed by incubation for 30 min after the  
769 addition of 10  $\mu$ L sodium carbonate solution (100 mM) and 10  $\mu$ L 2% benzoyl chloride  
770 acetonitrile. Then 1.6  $\mu$ L internal standard and 20  $\mu$ L 0.1% formic acid were added, and the  
771 samples were centrifuged (14,000 g  $\times$  5 min at 4 °C). 40  $\mu$  L of the supernatants were  
772 transferred to an auto-sampler vial for downstream UHPLC-MS/MS analysis. Serotonin  
773 hydrochloride,  $\gamma$ -aminobutyric acid, dopamine hydrochloride, tyramine, and octopamine  
774 hydrochloride (Aladdin; Shanghai, China) derivatized with benzoyl chloride (Sigma-  
775 Aldrich; Saint Louis, MO, USA) were used for the construction of the calibration standard  
776 curve. The internal standards mixture ( $\gamma$ -aminobutyric acid, dopamine hydrochloride,  
777 serotonin hydrochloride, tyramine, and octopamine hydrochloride derivatized with benzoyl  
778 chloride-d5 (Sigma-Aldrich; Saint Louis, MO, USA)<sup>95</sup> of the corresponding concentration  
779 were prepared, respectively.

780 The UHPLC separation was carried out using an ExionLC System (AB SCIEX; MA,  
781 USA), and the samples were analyzed on the QTRAP 6500 LC-MS/MS system (AB Sciex;  
782 Framingham, MA, USA). 2  $\mu$ L of samples were directly injected onto an ACQUITY UPLC  
783 HSS T3 column (100  $\times$  2.1 mm  $\times$  1.8  $\mu$ m; Waters; Milford, Ma, USA). The column  
784 temperature was set at 40 °C, and the auto-sampler temperature was set at 4 °C.  
785 Chromatographic separation was achieved using a 0.30 ml/min flow rate and a linear  
786 gradient of 0 to 2% B within 2 min; 2%–98% B in 9 min, followed by 98% B for 2 min and  
787 equilibration for 2 min. Solvent A is 0.1% formic acid and solvent B is acetonitrile. For all  
788 multiple reaction monitoring (MRM) experiments, 6500 QTrap acquisition parameters were



789 as follows: 5000 V Ion-spray voltage, curtain gas setting of 35 and nebulizer gas setting of  
790 60, temperature at 400 °C. Raw data were analyzed using Skyline<sup>96</sup>.

### 791 **Quasi-Targeted metabolomics analysis.**

792 Hemolymph and gut homogenate metabolites were determined by quasi-targeted  
793 metabolomics by HPLC-MS/MS. Gut samples (100mg) were individually grounded with  
794 liquid nitrogen and the homogenate was resuspended with prechilled 500 µL 80% methanol  
795 and 0.1% formic acid by well vortexing. 50 µL of hemolymph samples were mixed with 400  
796 µL prechilled methanol by vortexing. All samples were incubated on ice for 5 min and then  
797 centrifuged at 15,000 × g, at 4°C for 10 min. The supernatant was diluted to a final  
798 concentration containing 53% methanol by LC-MS grade water. The samples were then  
799 transferred to a fresh vial and centrifuged at 15,000 × g, 4°C for 20 min. Finally, the  
800 supernatant was injected into the LC-MS/MS system, and the analyses were performed using  
801 an ExionLC AD system (SCIEX) coupled with a QTRAP 6500+ mass spectrometer  
802 (SCIEX). Samples were injected onto a BEH C8 Column (100 mm × 2.1 mm × 1.9 µm)  
803 using a 30-min linear gradient at a flow rate of 0.35 mL/min for the positive polarity mode.  
804 Eluent A was 0.1% formic acid-water and eluent B is 0.1% formic acid-acetonitrile. The  
805 solvent gradient was set as follows: 5% B, 1 min; 5-100% B, 24.0 min; 100% B, 28.0  
806 min; 100-5% B, 28.1 min; 5% B, 30 min. QTRAP 6500+ mass spectrometer was operated in  
807 positive polarity mode with curtain gas of 35 psi, collision gas of Medium, ion spray voltage  
808 of 5500V, temperature of 500°C, ion source gas of 1:55, and ion source gas of 2:55. For  
809 negative ion mode, samples were injected onto aHSS T3 Column (100 mm × 2.1 mm) using  
810 a 25-min linear gradient at a flow rate of 0.35 mL/min. The solvent gradient was set as  
811 follows: 2% B, 1 min; 2%–100% B, 18.0 min; 100% B, 22.0 min; 100%–5% B, 22.1 min;  
812 5% B, 25 min. QTRAP 6500+ mass spectrometer was operated in negative polarity mode

813 with curtain gas of 35 psi, collision gas of medium, ion spray voltage of -4500V,  
814 temperature of 500°C, ion source gas of 1:55, and ion source gas of 2:55.

815 Detection of the experimental samples using MRM was based on Novogene in-house  
816 database. Q3 (daughter) was used for the quantification. Q1 (parent ion), Q3, retention time,  
817 declustering potential, and collision energy were used for metabolite identification. Data  
818 files generated by HPLC-MS/MS were processed with SCIEX OS (version 1.4) to integrate  
819 and correct the peaks. A total of 326 compounds were identified in the hemolymph samples.  
820 Metabolomics data analysis was then performed using MetaboAnalyst 4.0<sup>97</sup>.

### 821 **Weighted gene co-expression network analysis (WGCNA)**

822 R software package WGCNA 1.69<sup>98</sup> was used to identify key phenotype-related  
823 metabolic modules based on correlation patterns. The Pearson correlation matrix was  
824 calculated for all possible metabolite pairs and then transformed into an adjacency matrix  
825 with a soft thresholding power setting to 5 for the best topological overlap matrix. A  
826 dynamic tree cut algorithm was used to detect groups of highly correlated metabolites. The  
827 minimum module size was set to 14 and the threshold for merging module was set to 0.25 as  
828 default. Each module was assigned a unique color and contained a unique set of metabolites.  
829 After obtaining modules from each group, module eigenmetabolite was calculated with the  
830 “ModuleEigengenes” function. Association analysis between a module and the trait of each  
831 group was performed using the function of “corPvalueStudent” based on the module  
832 eigenmetabolite.  $p < 0.01$  was set for statistical significance. Metabolites in each module  
833 were annotated on the KEGG Database and classified into major categories using  
834 MetaboAnalyst 4.0<sup>97</sup> for enrichment analysis. Finally, the network connections among  
835 metabolites in modules were visualized using Cytoscape 3.7.0<sup>99</sup>.

## 836 **Statistical analysis**

837        Comparison of the learning and memory results was tested by Chi-squared test using  
838        GraphPad Prism 8.2.0 software. Comparisons of the distribution of gustatory response score,  
839        neurotransmitters, normalized and raw metabolite data of different bacterial colonized  
840        groups were made by Mann–Whitney *u* test using GraphPad Prism 8.2.0 software. The exact  
841        value of *n* representing the number of groups in the experiments described was indicated in  
842        the figure legends. Any additional technical replicates are described within the Methods and  
843        the Results.

## 844 **Data Availability**

845        The raw data for outdoor honeybee gut microbiome shotgun sequencing has been  
846        deposited under BioProject PRJNA670603. The accession numbers for the RNA sequencing  
847        data are PRJNA670620 and PRJNA668910. The proteomic data has been deposited to the  
848        Proteome Xchange Consortium with the dataset identifier PXD022304.

## 849 **Code availability**

850        The list of analysis software and all scripts generated for analysis have been deposited  
851        on GitHub at: [https://github.com/ZijingZhang93/bee\\_BGA.git](https://github.com/ZijingZhang93/bee_BGA.git).

852 **Supplemental Information**

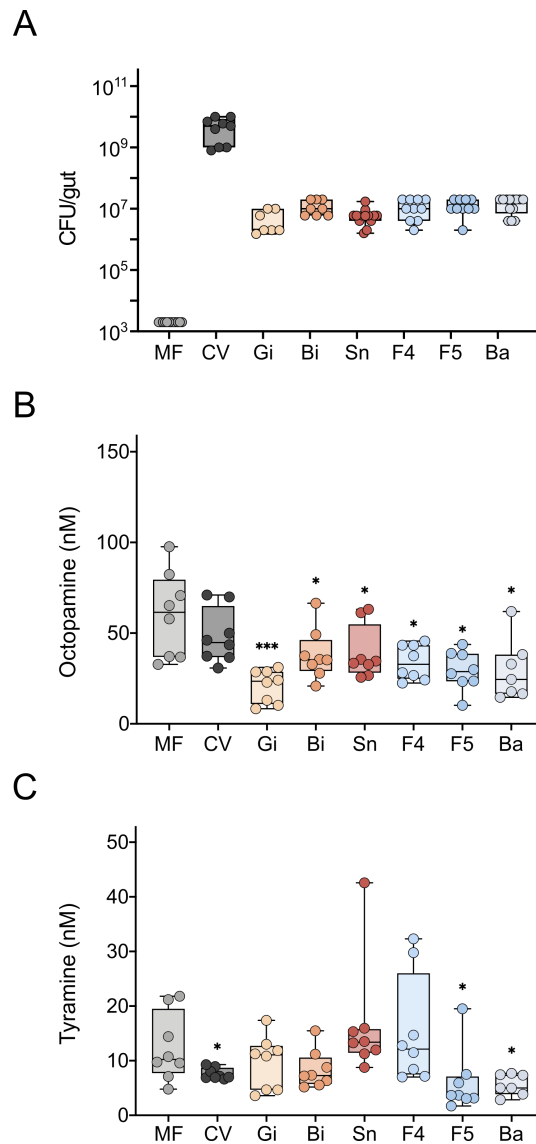

853

854 **Supplementary Fig. 1. Gut microbiota impacts the concentrations of tyramine and**  
855 **octopamine in the honeybee brain. (a) Boxplots of the total CFU per gut estimated by**  
856 **bacteria culture for MF and mono-colonized bees, or by qPCR for the CV group. (b-c)**  
857 **Concentrations of (b) tyramine and (c) octopamine in MF (n = 8), CV (n = 8), and mono-**  
858 **colonized (n = 8, except n = 7 for Ba group) bee brains. Differences between bacteria-**  
859 **colonized bees and the MF group were tested by Mann-Whitney *u* test (\**p* < 0.1, \*\**p* <**  
860 **0.01, \*\*\**p* < 0.001). Error bars represent min and max.**

A

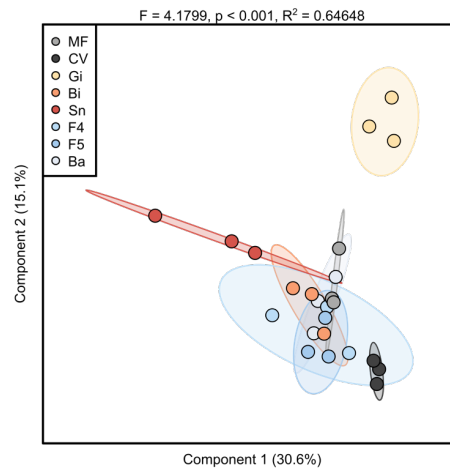

B

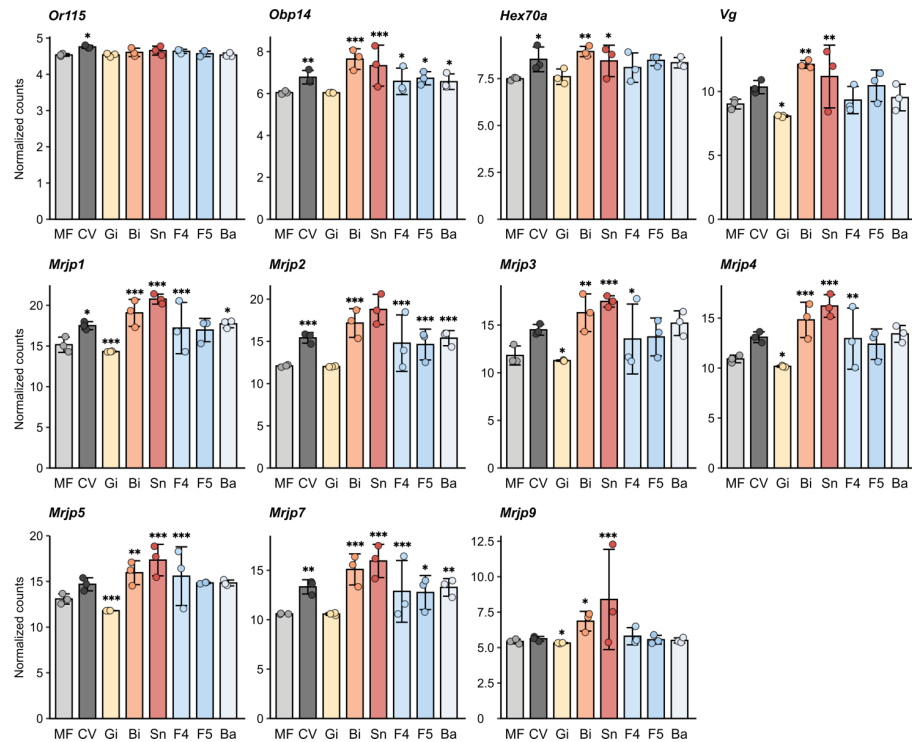

861

862 **Supplementary Fig. 2. Gut microbiome impacts gene expression in the honeybee**  
 863 **brain. (a)** Sparse PLS-DA based on normalized gene expression in the brain of microbiota-  
 864 free and bacteria-colonized bees. Group differences were tested by PERMANOVA. **(b)**  
 865 Relative expression levels of differentially expressed genes in the brains of different bee  
 866 groups. Differences between bacteria-colonized bees and the MF group were tested by  
 867 Wald test with Benjamini-Hochberg correction (\*FDR < 0.05, \*\*FDR < 0.01, \*\*\*FDR <  
 868 0.001). Data are shown as mean ± SEM.

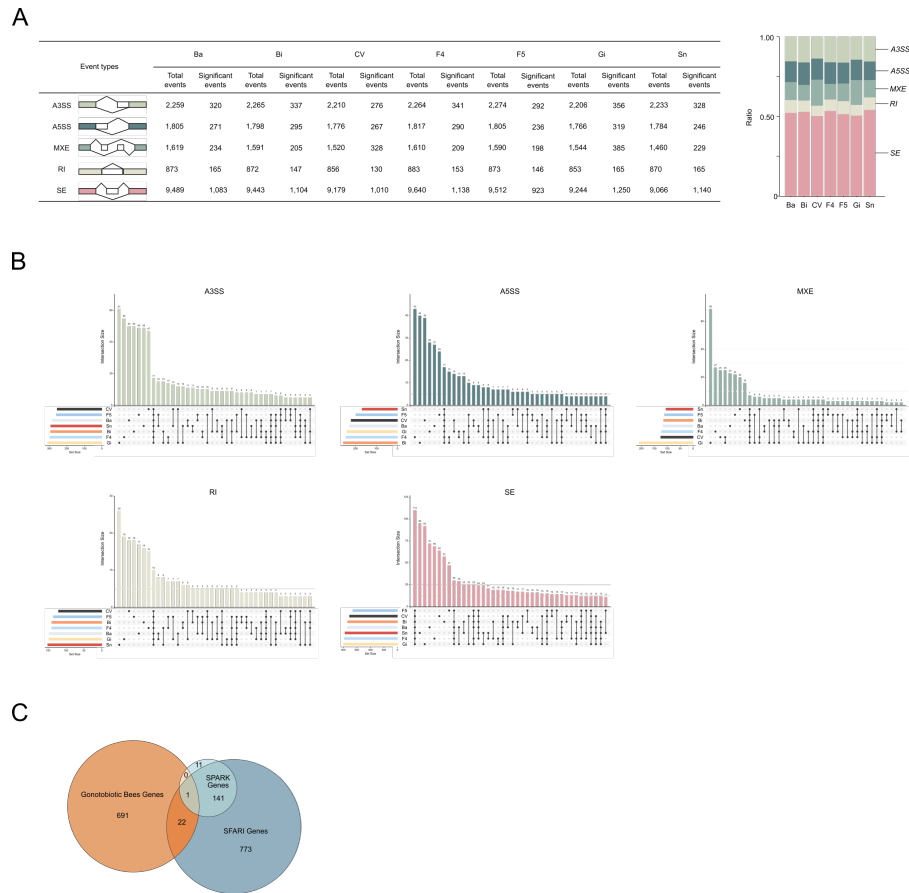

869

870 **Supplementary Fig. 3. Gut microbiome impacts spliced genes in the honeybee brain.**

871 **(a)** Numbers of the differential alternative splicing events in the brains of bacteria-  
 872 colonized bees compared to MF bees. Stacked column graph shows the relative abundance  
 873 of different types of alternative splicing events in each group. A3SS, alternative 3' splice  
 874 site; A5SS, alternative 5' splice site; MXE, mutually exclusive exon; RI, retained introns;  
 875 SE, skipped exon. **(b)** UpSet plots showing the intersections of alternative splicing (AS)  
 876 events associated with different bacteria-colonized groups. The dots and lines on the  
 877 bottom right represent which intersection is shown by the bar plots above. The size of  
 878 intersections is given above the bar plot. The total amount of different types of events for  
 879 each bee group is given to the left of the intersection diagram. **(c)** Venn diagram of  
 880 differentially expressed genes in the brains between MF and CV/mono-colonized bees  
 881 (FDR < 0.05), and their overlap with the SPARK and SFARI Gene datasets. Differentially  
 882 expressed genes were identified by Wald test with Benjamini-Hochberg correction.

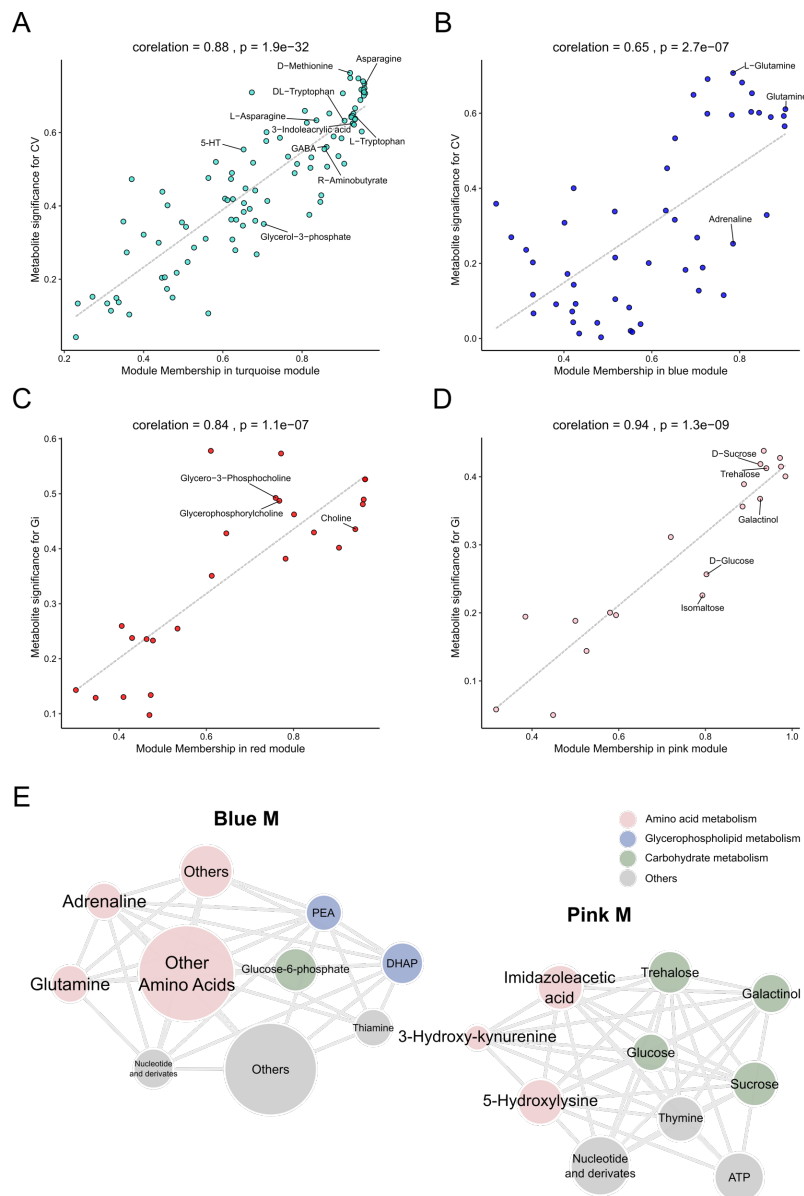

883

884 **Supplementary Fig. 4. Identification of intramodular connectivity and network**

885 **analysis. (a-d)** The correlation analysis between metabolite-module connectivity (X axis)

886 and metabolites significantly correlated with different bee groups (Y axis): **(a)** turquoise M

887 and **(b)** blue M with CV group; **(c)** red M and **(d)** pink M with Gi group. **(e)** Network

888 diagrams of differential metabolites in the blue and pink M. Circle colors indicate different

889 classes of metabolites in each module, and the circle size is proportional to the total

890 abundance of metabolites in each module.

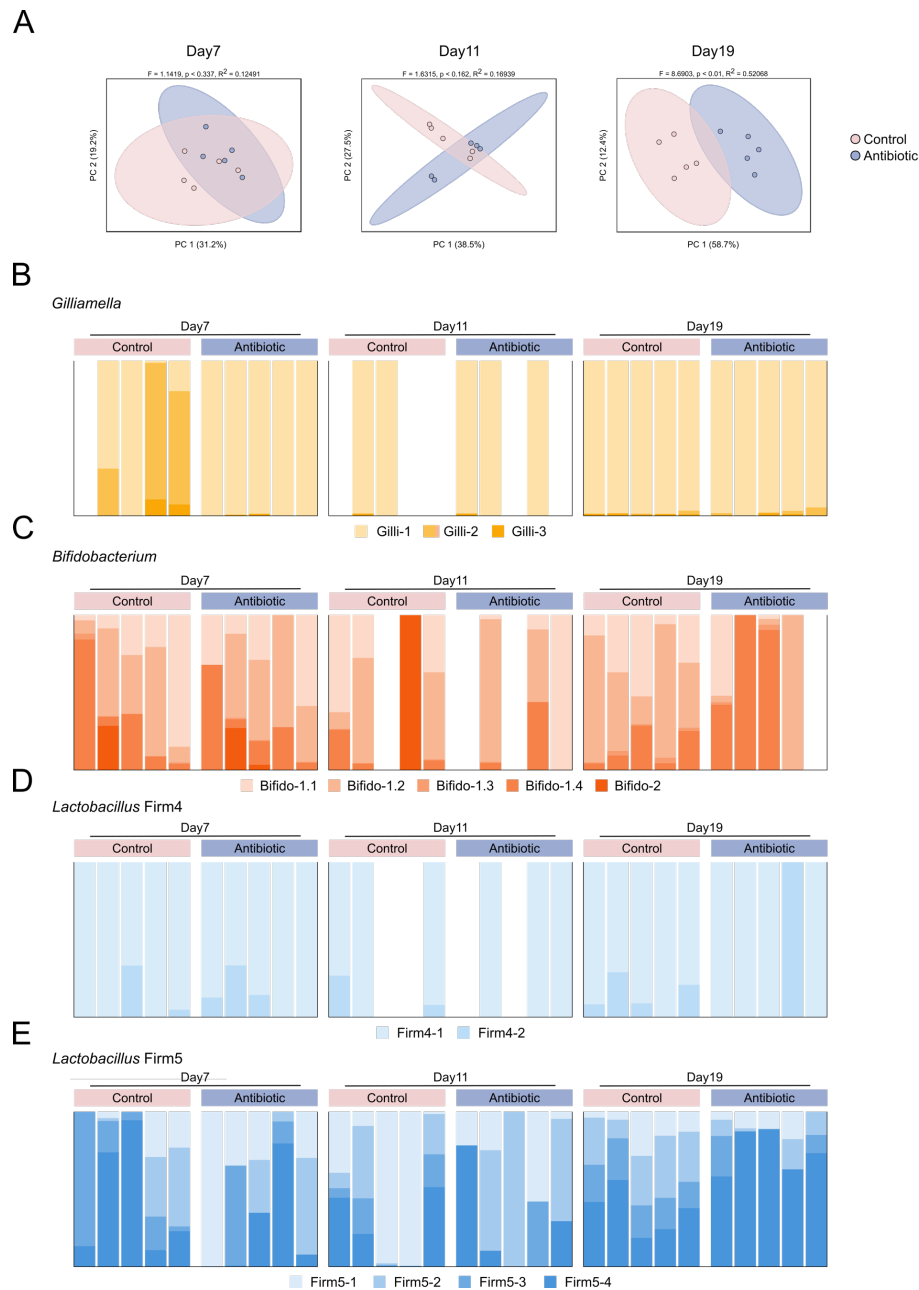

891

892 **Supplementary Fig. 5. Antibiotic treatment affects the gut microbiota of honeybees.**

893 (a) Principal coordinate analysis of Bray-Curtis dissimilarity of gut community

894 compositions of control and antibiotic-treated bees. Group differences were tested by

895 PERMANOVA. (b-e) Compositions at SDP-level for four core bee gut members: (b)

896 *Gilliamella*, (c) *Bifidobacterium*, (d) *Lactobacillus Firm-4*, and (e) *Lactobacillus Firm-5*.



897 **Supplementary Data 1.** Normalized gene expression levels in brains of microbiota-free  
898 and bacteria-colonized bees.

899 **Supplementary Data 2.** Alternative splicing events in brains of microbiota-free and  
900 bacteria-colonized bees.

901 **Supplementary Data 3.** Identification and biological function analysis of proteins  
902 expressed in brains of microbiota-free and conventional bees.

903 **Supplementary Data 4.** Raw data of all metabolites abundance in the hemolymph of  
904 microbiota-free and bacteria-colonized bees, and in the colon of antibiotic-treated and  
905 control bees.

906 **Supplementary Data 5.** Hemolymph metabolomic WGCNA module analysis of  
907 microbiota-free and bacteria-colonized bees.

908 **Supplementary Data 6.** The list of genomes of bacterial isolates in the database for  
909 MIDAS profiling.

910 **Supplementary Movie 1.** Olfactory learning and memory test.

## 911 **References**

- 912 1 Cryan, J. F. & Dinan, T. G. Mind-altering microorganisms: the impact of the gut  
913 microbiota on brain and behaviour. *Nat. Rev. Neurosci.* **13**, 701-712, (2012).
- 914 2 Hsiao, E. Y. *et al.* Microbiota modulate behavioral and physiological abnormalities  
915 associated with neurodevelopmental disorders. *Cell* **155**, 1451-1463, (2013).
- 916 3 Taj, A. & Jamil, N. Bioconversion of tyrosine and tryptophan derived biogenic amines  
917 by neuropathogenic bacteria. *Biomolecules* **8**, 10, (2018).
- 918 4 Marques, T. M. *et al.* Influence of GABA and GABA-producing *Lactobacillus brevis*  
919 DPC 6108 on the development of diabetes in a streptozotocin rat model. *Benef. Microbes* **7**,  
920 409-420, (2016).
- 921 5 Clarke, G. *et al.* The microbiome-gut-brain axis during early life regulates the  
922 hippocampal serotonergic system in a sex-dependent manner. *Mol. Psychiatry* **18**, 666-673,  
923 (2013).
- 924 6 Nankova, B. B., Agarwal, R., MacFabe, D. F. & La Gamma, E. F. Enteric bacterial  
925 metabolites propionic and butyric acid modulate gene expression, including CREB-dependent  
926 catecholaminergic neurotransmission, in PC12 cells--possible relevance to autism spectrum  
927 disorders. *PLoS One* **9**, e103740, (2014).
- 928 7 Sharon, G. *et al.* Human gut microbiota from autism spectrum disorder promote  
929 behavioral symptoms in mice. *Cell* **177**, 1600-1618 e1617, (2019).
- 930 8 Bobay, L. M. & Raymann, K. Population genetics of host-associated microbiomes.  
931 *Curr. Mol. Bio. Rep.* **5**, 128-139, (2019).
- 932 9 Scheiner, R. *et al.* Standard methods for behavioural studies of *Apis mellifera*. *J.*  
933 *Apicult. Res.* **52**, 1-58, (2013).
- 934 10 Kwong, W. K. & Moran, N. A. Gut microbial communities of social bees. *Nat. Rev.*  
935 *Microbiol.* **14**, 374-384, (2016).
- 936 11 Bonilla-Rosso, G. & Engel, P. Functional roles and metabolic niches in the honey bee  
937 gut microbiota. *Curr. Opin. Microbiol.* **43**, 69-76, (2018).
- 938 12 Ellegaard, K. M. & Engel, P. Genomic diversity landscape of the honey bee gut  
939 microbiota. *Nat. Commun.* **10**, 446, (2019).
- 940 13 Kešnerová, L. *et al.* Disentangling metabolic functions of bacteria in the honey bee  
941 gut. *PLoS Biol.* **15**, e2003467, (2017).
- 942 14 Zheng, H., Powell, J. E., Steele, M. I., Dietrich, C. & Moran, N. A. Honeybee gut  
943 microbiota promotes host weight gain via bacterial metabolism and hormonal signaling. *Proc.*  
944 *Natl. Acad. Sci. U S A* **114**, 4775-4780, (2017).
- 945 15 Zheng, H., Steele, M. I., Leonard, S. P., Motta, E. V. S. & Moran, N. A. Honey bees as  
946 models for gut microbiota research. *Lab Anim. (NY)* **47**, 317-325, (2018).

- 947 16 Zheng, H. *et al.* Division of labor in honey bee gut microbiota for plant polysaccharide  
948 digestion. *Proc. Natl. Acad. Sci. U S A* **116**, 25909-25916, (2019).
- 949 17 Harris, J. W. & Woodring, J. Effects of stress, age, season, and source colony on  
950 levels of octopamine, dopamine and serotonin in the honey bee (*Apis mellifera* L.) brain. *J.*  
951 *Insect Physiol.* **38**, 29–35, (1992).
- 952 18 Farina, W. M., Grüter, C. & Arenas, A. in *Honeybee Neurobiology and Behavior*  
953 (eds C. Galizia, D. Eisenhardt, & M. Giurfa) 89-101 (Springer, 2012).
- 954 19 Laloi, D., Gallois, M., Roger, B. & Pham-Delegue, M. H. Changes with age in  
955 olfactory conditioning performance of worker honey bees (*Apis mellifera*). *Apidologie* **32**,  
956 231-242, (2001).
- 957 20 Simcock, N. K., Gray, H., Bouchebti, S. & Wright, G. A. Appetitive olfactory learning  
958 and memory in the honeybee depend on sugar reward identity. *J. Insect Physiol.* **106**, 71-77,  
959 (2018).
- 960 21 Giurfa, M. Behavioral and neural analysis of associative learning in the honeybee: a  
961 taste from the magic well. *J. Comp. Physiol. A.* **193**, 801-824, (2007).
- 962 22 Mercer, A. R. & Menzel, R. The effects of biogenic amines on conditioned and  
963 unconditioned responses to olfactory stimuli in the honeybee *Apis mellifera*. *J. Comp.*  
964 *Physiol.* **145**, 363–368, (1982).
- 965 23 Scheiner, R., Plückerhahn, S., Oney, B., Blenau, W. & Erber, J. Behavioural  
966 pharmacology of octopamine, tyramine and dopamine in honey bees. *Behav. Brain Res.* **136**,  
967 545-553, (2002).
- 968 24 Stopfer, M., Bhagavan, S., Smith, B. H. & Laurent, G. Impaired odour discrimination  
969 on desynchronization of odour-encoding neural assemblies. *Nature* **390**, 70-74, (1997).
- 970 25 El Hassani, A. K., Dacher, M., Gauthier, M. & Armengaud, C. Effects of sublethal  
971 doses of fipronil on the behavior of the honeybee (*Apis mellifera*). *Pharmacol. Biochem.*  
972 *Behav.* **82**, 30-39, (2005).
- 973 26 El Hassani, A. K., Dupuis, J. P., Gauthier, M. & Armengaud, C. Glutamatergic and  
974 GABAergic effects of fipronil on olfactory learning and memory in the honeybee. *Invert.*  
975 *Neurosci.* **9**, 91-100, (2009).
- 976 27 Li, Z. G. *et al.* Brain transcriptome of honey bees (*Apis mellifera*) exhibiting impaired  
977 olfactory learning induced by a sublethal dose of imidacloprid. *Pestic. Biochem. Physiol.* **156**,  
978 36-43, (2019).
- 979 28 Vogt, R. G., Prestwich, G. D. & Lerner, M. R. Odorant-binding-protein subfamilies  
980 associate with distinct classes of olfactory receptor neurons in insects. *J. Neurobiol.* **22**, 74-  
981 84, (1991).
- 982 29 Ullah, R. M. K. *et al.* An odorant binding protein (SaveOBP9) involved in  
983 chemoreception of the wheat aphid *Sitobion avenae*. *Int. J. Mol. Sci.* **21**, 8331, (2020).

- 984 30 Drapeau, M. D., Albert, S., Kucharski, R., Prusko, C. & Maleszka, R. Evolution of the  
985 Yellow/Major Royal Jelly Protein family and the emergence of social behavior in honey bees.  
986 *Genome Res.* **16**, 1385-1394, (2006).
- 987 31 Nunes, F. M. F., Ihle, K. E., Mutti, N. S., Simoes, Z. L. P. & Amdam, G. V. The gene  
988 vitellogenin affects microRNA regulation in honey bee (*Apis mellifera*) fat body and brain. *J.*  
989 *Exp. Biol.* **216**, 3724-3732, (2013).
- 990 32 Martins, J. R., Nunes, F. M. F., Cristino, A. S., Simoes, Z. P. & Bitondi, M. M. G. The  
991 four hexamerin genes in the honey bee: structure, molecular evolution and function deduced  
992 from expression patterns in queens, workers and drones. *BMC Mol. Biol.* **11**, 23, (2010).
- 993 33 Mergenthaler, P., Lindauer, U., Dienel, G. A. & Meisel, A. Sugar for the brain: the  
994 role of glucose in physiological and pathological brain function. *Trends Neurosci.* **36**, 587-  
995 597, (2013).
- 996 34 Shpigler, H. Y. *et al.* Deep evolutionary conservation of autism-related genes. *Proc.*  
997 *Natl. Acad. Sci. U S A* **114**, 9653-9658, (2017).
- 998 35 Voineagu, I. *et al.* Transcriptomic analysis of autistic brain reveals convergent  
999 molecular pathology. *Nature* **474**, 380-384, (2011).
- 1000 36 Abrahams, B. S. *et al.* SFARI Gene 2.0: a community-driven knowledgebase for the  
1001 autism spectrum disorders (ASDs). *Mol. Autism* **4**, 36, (2013).
- 1002 37 Kordeli, E. & Bennett, V. Distinct ankyrin isoforms at neuron cell-bodies and nodes of  
1003 Ranvier resolved using erythrocyte ankyrin deficient mice. *J. Cell Biol.* **114**, 1243-1259,  
1004 (1991).
- 1005 38 Willsey, A. J. *et al.* Coexpression networks implicate human midfetal deep cortical  
1006 projection neurons in the pathogenesis of autism. *Cell* **155**, 997-1007, (2013).
- 1007 39 Kaeser, P. S., Deng, L. B., Fan, M. M. & Sudhof, T. C. RIM genes differentially  
1008 contribute to organizing presynaptic release sites. *Proc. Natl. Acad. Sci. U S A* **109**, 11830-  
1009 11835, (2012).
- 1010 40 Sialana, F. J. *et al.* Proteome changes paralleling the olfactory conditioning in the  
1011 forager honey bee and provision of a brain proteomics dataset. *Proteomics* **19**, e1900094,  
1012 (2019).
- 1013 41 Gauthier, M. & Grünewald, B. in *Honeybee Neurobiology and Behavior* (eds C.  
1014 Galizia, D. Eisenhardt, & M. Giurfa) 155-169 (Springer, 2012).
- 1015 42 Grünewald, B. in *Honeybee Neurobiology and Behavior* (eds C. Galizia, D.  
1016 Eisenhardt, & M. Giurfa) 185-198 (Springer, 2012).
- 1017 43 Engel, P., Martinson, V. G. & Moran, N. A. Functional diversity within the simple gut  
1018 microbiota of the honey bee. *Proc. Natl. Acad. Sci. U S A* **109**, 11002-11007, (2012).
- 1019 44 Agus, A., Planchais, J. & Sokol, H. Gut microbiota regulation of tryptophan  
1020 metabolism in health and disease. *Cell Host Microbe* **23**, 716-724, (2018).

- 1021 45 Wlodarska, M. *et al.* Indoleacrylic acid produced by commensal *Peptostreptococcus*  
1022 species suppresses inflammation. *Cell Host Microbe* **22**, 25-37.e26, (2017).
- 1023 46 Zheng, P. *et al.* The gut microbiome modulates gut-brain axis glycerophospholipid  
1024 metabolism in a region-specific manner in a nonhuman primate model of depression. *Mol.*  
1025 *Psychiatry*. <https://doi.org/10.1038/s41380-020-0744-2>, (2020).
- 1026 47 Paerhati, Y. *et al.* Expression of *AmGRI10* of the gustatory receptor family in honey  
1027 bee is correlated with nursing behavior. *PLoS One* **10**, e0142917, (2015).
- 1028 48 Liu, F. *et al.* lncRNA profile of *Apis mellifera* and its possible role in behavioural  
1029 transition from nurses to foragers. *Bmc Genomics* **20**, 393, (2019).
- 1030 49 Callery, P. S. & Geelhaar, L. A. 1 - Piperidine as an in vivo precursor of the  $\gamma$  -  
1031 aminobutyric acid homologue 5 - aminopentanoic acid. *J. Neurochem.* **45**, 946-948, (1985).
- 1032 50 Srinivasan, M. V. Honey bees as a model for vision, perception, and cognition. *Annu.*  
1033 *Rev. Entomol.* **55**, 267-284, (2010).
- 1034 51 Johnson, B. R. Division of labor in honeybees: form, function, and proximate  
1035 mechanisms. *Behav. Ecol. Sociobiol.* **64**, 305-316, (2010).
- 1036 52 Kapheim, K. M. *et al.* Caste-specific differences in hindgut microbial communities of  
1037 honey bees (*Apis mellifera*). *PLoS One* **10**, e0123911, (2015).
- 1038 53 Kešnerová, L. *et al.* Gut microbiota structure differs between honeybees in winter and  
1039 summer. *ISME J.* **14**, 801-814, (2020).
- 1040 54 Leger, L. & McFrederick, Q. S. The gut-brain-microbiome axis in bumble bees.  
1041 *Insects* **11**, 517, (2020).
- 1042 55 McNally, G. P. & Westbrook, R. F. Predicting danger: the nature, consequences, and  
1043 neural mechanisms of predictive fear learning. *Learn. Mem.* **13**, 245-253, (2006).
- 1044 56 Vergoz, V., Roussel, E., Sandoz, J. C. & Giurfa, M. Aversive learning in honeybees  
1045 revealed by the olfactory conditioning of the sting extension reflex. *PLoS One* **2**, e288,  
1046 (2007).
- 1047 57 Laska, M., Galizia, C. G., Giurfa, M. & Menzel, R. Olfactory discrimination ability  
1048 and odor structure-activity relationships in honeybees. *Chem. Senses* **24**, 429-438, (1999).
- 1049 58 Harbo, J. R. Effect of population size on brood production, worker survival and honey  
1050 gain in colonies of honeybees. *J. Apicult. Res.* **25**, 22-29, (1986).
- 1051 59 DeNieu, M., Mounts, K. & Manier, M. Two gut microbes are necessary and sufficient  
1052 for normal cognition in *Drosophila melanogaster*. *bioRxiv*, 593723, (2019).
- 1053 60 Raymann, K., Bobay, L. M. & Moran, N. A. Antibiotics reduce genetic diversity of  
1054 core species in the honeybee gut microbiome. *Mol. Ecol.* **27**, 2057-2066, (2018).
- 1055 61 Raymann, K., Shaffer, Z. & Moran, N. A. Antibiotic exposure perturbs the gut  
1056 microbiota and elevates mortality in honeybees. *PLoS Biol.* **15**, e2001861, (2017).

- 1057 62 Amdam, G. V., Fennern, E. & Havukainen, H. in *Honeybee Neurobiology and*  
1058 *Behavior* Vol., Dordrecht (eds C. Galizia, D. Eisenhardt, & M. Giurfa) 17-29 (Springer,  
1059 2012).
- 1060 63 Huang, S. K. *et al.* Evaluation of cage designs and feeding regimes for honey bee  
1061 (Hymenoptera: Apidae) laboratory experiments. *J. Econ. Entomol.* **107**, 54-62, (2014).
- 1062 64 Li, J. H. *et al.* Pollen reverses decreased lifespan, altered nutritional metabolism and  
1063 suppressed immunity in honey bees (*Apis mellifera*) treated with antibiotics. *J. Exp. Biol.* **222**,  
1064 jeb202077, (2019).
- 1065 65 Kocher, S. D. *et al.* The genetic basis of a social polymorphism in halictid bees. *Nat.*  
1066 *Commun.* **9**, 4338, (2018).
- 1067 66 Sherwin, E., Bordenstein, S. R., Quinn, J. L., Dinan, T. G. & Cryan, J. F. Microbiota  
1068 and the social brain. *Science* **366**, eaar2016, (2019).
- 1069 67 Vernier, C. L. *et al.* The gut microbiome defines social group membership in honey  
1070 bee colonies. *Sci. Adv.* **6**, eabd3431, (2020).
- 1071 68 Teseo, S. *et al.* The scent of symbiosis: gut bacteria may affect social interactions in  
1072 leaf-cutting ants. *Anim. Behav.* **150**, 239-254, (2019).
- 1073 69 Matsuura, K. Nestmate recognition mediated by intestinal bacteria in a termite,  
1074 *Reticulitermes speratus*. *Oikos* **92**, 20-26, (2001).
- 1075 70 Kałużna-Czaplińska, J., Gałtarek, P., Chirumbolo, S., Chartrand, M. S. & Bjørklund,  
1076 G. How important is tryptophan in human health? *Crit. Rev. Food Sci. Nutr.* **59**, 72-88,  
1077 (2019).
- 1078 71 Lim, C. K. *et al.* Altered kynurenine pathway metabolism in autism: implication for  
1079 immune-induced glutamatergic activity. *Autism Res.* **9**, 621-631, (2016).
- 1080 72 Chen, K. *et al.* *Drosophila* histone demethylase KDM5 regulates social behavior  
1081 through immune control and gut microbiota maintenance. *Cell Host Microbe* **25**, 537-552,  
1082 (2019).
- 1083 73 Ismail, N., Robinson, G. E. & Fahrbach, S. E. Stimulation of muscarinic receptors  
1084 mimics experience-dependent plasticity in the honey bee brain. *Proc. Natl. Acad. Sci. U S A*  
1085 **103**, 207-211, (2006).
- 1086 74 Smith, D. B. *et al.* Insecticide exposure during brood or early-adult development  
1087 reduces brain growth and impairs adult learning in bumblebees. *Proc. Biol. Sci.* **287**,  
1088 20192442, (2020).
- 1089 75 Kohno, H., Suenami, S., Takeuchi, H., Sasaki, T. & Kubo, T. Production of knockout  
1090 mutants by CRISPR/Cas9 in the European honeybee, *Apis mellifera* L. *Zoolog. Sci.* **33**, 505-  
1091 512, (2016).
- 1092 76 Leonard, S. P. *et al.* Genetic engineering of bee gut microbiome bacteria with a toolkit  
1093 for modular assembly of broad-host-range plasmids. *ACS Synth. Biol.* **7**, 1279-1290, (2018).

- 1094 77 Kwong, W. K. & Moran, N. A. Cultivation and characterization of the gut symbionts  
1095 of honey bees and bumble bees: description of *Snodgrassella alvi* gen. nov., sp. nov., a  
1096 member of the family *Neisseriaceae* of the *Betaproteobacteria*, and *Gilliamella apicola* gen.  
1097 nov., sp. nov., a member of *Orbaceae* fam. nov., *Orbales* ord. nov., a sister taxon to the order  
1098 '*Enterobacteriales*' of the *Gammaproteobacteria*. *Int. J. Syst. Evol. Microbiol.* **63**, 2008-2018,  
1099 (2013).
- 1100 78 Zufelato, M. S., Lourenco, A. P., Simoes, Z. L., Jorge, J. A. & Bitondi, M. M.  
1101 Phenoloxidase activity in *Apis mellifera* honey bee pupae, and ecdysteroid-dependent  
1102 expression of the prophenoloxidase mRNA. *Insect Biochem. Mol. Biol.* **34**, 1257-1268,  
1103 (2004).
- 1104 79 Mota, T., Giurfa, M. & Sandoz, J. C. Color modulates olfactory learning in honeybees  
1105 by an occasion-setting mechanism. *Learn. Mem.* **18**, 144-155, (2011).
- 1106 80 Guerrieri, F., Schubert, M., Sandoz, J. C. & Giurfa, M. Perceptual and neural olfactory  
1107 similarity in honeybees. *PLoS Biol.* **3**, 718-732, (2005).
- 1108 81 Page, R. E., Jr., Erber, J. & Fondrk, M. K. The effect of genotype on response  
1109 thresholds to sucrose and foraging behavior of honey bees (*Apis mellifera* L.). *J. Comp.*  
1110 *Physiol. A.* **182**, 489-500, (1998).
- 1111 82 Mengoni Goñalons, C. & Farina, W. M. Effects of sublethal doses of imidacloprid on  
1112 young adult honeybee behaviour. *PLoS One* **10**, e0140814, (2015).
- 1113 83 Huang, Z. Y. & Robinson, G. E. Honeybee colony integration: worker-worker  
1114 interactions mediate hormonally regulated plasticity in division of labor. *Proc. Natl. Acad.*  
1115 *Sci. U S A* **89**, 11726-11729, (1992).
- 1116 84 Jones, J. C. *et al.* The gut microbiome is associated with behavioural task in honey  
1117 bees. *Insectes Soc.* **65**, 419-429, (2018).
- 1118 85 Nayfach, S., Rodriguez-Mueller, B., Garud, N. & Pollard, K. S. An integrated  
1119 metagenomics pipeline for strain profiling reveals novel patterns of bacterial transmission and  
1120 biogeography. *Genome Res.* **26**, 1612-1625, (2016).
- 1121 86 Kim, D., Paggi, J. M., Park, C., Bennett, C. & Salzberg, S. L. Graph-based genome  
1122 alignment and genotyping with HISAT2 and HISAT-genotype. *Nat. Biotechnol.* **37**, 907-915,  
1123 (2019).
- 1124 87 Anders, S., Pyl, P. T. & Huber, W. HTSeq--a Python framework to work with high-  
1125 throughput sequencing data. *Bioinformatics* **31**, 166-169, (2015).
- 1126 88 Love, M. I., Huber, W. & Anders, S. Moderated estimation of fold change and  
1127 dispersion for RNA-seq data with DESeq2. *Genome Biol.* **15**, 550, (2014).
- 1128 89 Benjamini, Y. & Yekutieli, D. The control of the false discovery rate in multiple  
1129 testing under dependency. *Ann. Statist.* **29**, 1165-1188, (2001).
- 1130 90 Huerta-Cepas, J. *et al.* Fast genome-wide functional annotation through orthology  
1131 assignment by eggNOG-mapper. *Mol. Biol. Evol.* **34**, 2115-2122, (2017).

- 1132 91 Yu, G., Wang, L. G., Han, Y. & He, Q. Y. clusterProfiler: an R package for comparing  
1133 biological themes among gene clusters. *OMICS* **16**, 284-287, (2012).
- 1134 92 Shen, S. *et al.* rMATS: robust and flexible detection of differential alternative splicing  
1135 from replicate RNA-Seq data. *Proc. Natl. Acad. Sci. U S A* **111**, E5593-E5601, (2014).
- 1136 93 Altschul, S. F., Gish, W., Miller, W., Myers, E. W. & Lipman, D. J. Basic local  
1137 alignment search tool. *J. Mol. Biol.* **215**, 403-410, (1990).
- 1138 94 Meng, L. *et al.* Proteomics reveals the molecular underpinnings of stronger learning  
1139 and memory in eastern compared to western bees. *Mol. Cell Proteomics* **17**, 255-269, (2018).
- 1140 95 Wong, J. M. *et al.* Benzoyl chloride derivatization with liquid chromatography-mass  
1141 spectrometry for targeted metabolomics of neurochemicals in biological samples. *J.*  
1142 *Chromatogr. A.* **1446**, 78-90, (2016).
- 1143 96 MacLean, B. *et al.* Skyline: an open source document editor for creating and analyzing  
1144 targeted proteomics experiments. *Bioinformatics* **26**, 966-968, (2010).
- 1145 97 Chong, J., Wishart, D. S. & Xia, J. Using MetaboAnalyst 4.0 for comprehensive and  
1146 integrative metabolomics data analysis. *Curr. Protoc. Bioinformatics* **68**, e86, (2019).
- 1147 98 Langfelder, P. & Horvath, S. WGCNA: an R package for weighted correlation  
1148 network analysis. *BMC Bioinformatics* **9**, 559, (2008).
- 1149 99 Shannon, P. *et al.* Cytoscape: a software environment for integrated models of  
1150 biomolecular interaction networks. *Genome Res.* **13**, 2498-2504, (2003).

1151

## 1152 **Acknowledgments**

1153 This work was funded by National Key R&D Program of China, (Grant No.  
1154 2019YFA0906500), National Natural Science Foundation of China Project 31870472.

## 1155 **Author Contributions**

1156 H.Z. supervised the study; H.Z. and Z.Z. designed the study; Z.Z., Q.C. and Y.S.  
1157 collected samples and performed the behavioral experiments; Z.Z. generated data and  
1158 performed the data analyses with contributions from X.M. and X.H.; H.Z., Z.Z., X.M., and  
1159 X.H. prepared the manuscript.

## 1160 **Competing Interests**

1161 The authors declare no competing interests.
