# Supplementary material for: Honeybee gut microbiota modulates host behaviors and neurological processes
Source: bioRxiv preprint, doi:10.1101/2020.12.19.423587, version 1 (2020-12-20)
Supplement: Supplementary Data 3 [file 423587_file04.xlsx]

## Sheet: 3.1
Supplementary Data 3.1. Identification of proteins expressed in brains in microbiota-free bees. Accession number is a unique identifer of a protein in the database of NCBI. The value of -10lgP is a conversion of P-value that all identified protein and peptide, which is greater than P<0.01 of FDR thresold. #Peptides are total peptide number assigned to the proteins. #Unique peptide is the number t…
Accession	-10lgP	Coverage (%)	#Peptides	#Unique	Mass	Description
A0A088A113	91.19	1	2	2	228654	Uncharacterized protein OS=Apis mellifera OX=7460 GN=osa PE=4 SV=1
A0A088AN05	76.88	1	3	3	333131	Uncharacterized protein OS=Apis mellifera OX=7460 PE=4 SV=1
A0A088AKK7	76.63	1	3	3	563407	Uncharacterized protein OS=Apis mellifera OX=7460 PE=4 SV=1
A0A087ZZB0	69.15	1	2	2	478140	Uncharacterized protein OS=Apis mellifera OX=7460 PE=4 SV=1
A0A087ZUH3	68.83	1	2	2	352688	Uncharacterized protein OS=Apis mellifera OX=7460 PE=4 SV=1
A0A088ACM6	67.67	1	1	1	162002	Uncharacterized protein OS=Apis mellifera OX=7460 GN=LOC551826 PE=4 SV=1
A0A088APG9	61.65	1	2	2	235891	Uncharacterized protein OS=Apis mellifera OX=7460 GN=LOC724747 PE=4 SV=1
A0A087ZMR6	61.58	1	1	1	165086	Uncharacterized protein OS=Apis mellifera OX=7460 PE=4 SV=1
A0A088A3N0	61.07	1	1	1	116714	Uncharacterized protein OS=Apis mellifera OX=7460 PE=4 SV=1
A0A088A9G7	60.39	1	1	1	91426	Uncharacterized protein OS=Apis mellifera OX=7460 PE=4 SV=1
A0A088AD15	59.82	1	2	2	262360	Uncharacterized protein OS=Apis mellifera OX=7460 PE=4 SV=1
A0A087ZPX7	57.05	1	2	2	414833	Uncharacterized protein OS=Apis mellifera OX=7460 PE=4 SV=1
A0A088A1V6	56.11	1	1	1	173905	Uncharacterized protein OS=Apis mellifera OX=7460 PE=4 SV=1
A0A088AN13	55.43	1	1	1	194708	Uncharacterized protein OS=Apis mellifera OX=7460 PE=3 SV=1
A0A088AVR1	54.88	1	1	1	100667	Uncharacterized protein OS=Apis mellifera OX=7460 PE=4 SV=1
A0A088AKS6	54.69	1	1	1	179940	Uncharacterized protein OS=Apis mellifera OX=7460 PE=4 SV=1
A0A088A9B2	54.59	1	1	1	122279	Uncharacterized protein OS=Apis mellifera OX=7460 GN=LOC411750 PE=4 SV=1
A0A088AE72	50.17	1	1	1	175967	Uncharacterized protein OS=Apis mellifera OX=7460 GN=LOC410867 PE=4 SV=1
A0A088AFX0	49.34	1	1	1	115742	Uncharacterized protein OS=Apis mellifera OX=7460 PE=4 SV=1
A0A088ACE4	48.5	1	1	1	164223	Uncharacterized protein OS=Apis mellifera OX=7460 GN=Nup214 PE=4 SV=1
A0A088A0H9	48.24	1	1	1	213123	Uncharacterized protein OS=Apis mellifera OX=7460 GN=LOC725550 PE=4 SV=1
A0A087ZSL6	47.48	1	1	1	128636	Uncharacterized protein OS=Apis mellifera OX=7460 GN=NRD1 PE=3 SV=1
A0A088A3U7	47.37	1	1	1	183346	Uncharacterized protein OS=Apis mellifera OX=7460 GN=LOC408551 PE=4 SV=1
A0A088A5V3	47.16	1	1	1	165986	Uncharacterized protein OS=Apis mellifera OX=7460 GN=kinesin-4A PE=3 SV=1
A0A088A391	45.5	1	2	2	254799	Uncharacterized protein OS=Apis mellifera OX=7460 PE=4 SV=1
A0A087ZQ54	44.83	1	1	1	162570	Uncharacterized protein OS=Apis mellifera OX=7460 PE=4 SV=1
A0A088AEQ8	44.38	1	1	1	96720	Uncharacterized protein OS=Apis mellifera OX=7460 PE=4 SV=1
A0A088AVL1	44.2	1	1	1	125231	Uncharacterized protein OS=Apis mellifera OX=7460 GN=gry PE=4 SV=1
A0A088A776	43.47	1	1	1	96180	Chloride channel protein OS=Apis mellifera OX=7460 PE=3 SV=1
A0A088AN53	43.35	1	1	1	177597	Uncharacterized protein OS=Apis mellifera OX=7460 PE=4 SV=1
A0A088A5L4	42.56	1	1	1	94491	Uncharacterized protein OS=Apis mellifera OX=7460 PE=4 SV=1
A0A088ANK6	42.38	1	1	1	110109	Uncharacterized protein OS=Apis mellifera OX=7460 PE=4 SV=1
A0A087ZT86	42.34	1	1	1	185662	Uncharacterized protein OS=Apis mellifera OX=7460 PE=4 SV=1
A0A088AJP8	41.95	1	1	1	111715	Uncharacterized protein OS=Apis mellifera OX=7460 GN=LOC411237 PE=4 SV=1
A0A088AR47	41.56	1	1	1	109999	Uncharacterized protein OS=Apis mellifera OX=7460 PE=4 SV=1
A0A088ALS7	41.53	1	1	1	201878	Uncharacterized protein OS=Apis mellifera OX=7460 PE=4 SV=1
A0A088ARN1	41.02	1	1	1	263964	Uncharacterized protein OS=Apis mellifera OX=7460 PE=4 SV=1
A0A088AH87	40.99	1	2	2	202546	Uncharacterized protein OS=Apis mellifera OX=7460 GN=LOC410886 PE=4 SV=1
A0A087ZMT4	39.66	1	1	1	137269	Uncharacterized protein OS=Apis mellifera OX=7460 PE=4 SV=1
A0A087ZNP6	39.36	1	1	1	153716	Uncharacterized protein OS=Apis mellifera OX=7460 GN=LOC412128 PE=4 SV=1
A0A088AAN0	38.99	1	1	1	81805	Uncharacterized protein OS=Apis mellifera OX=7460 GN=LOC413702 PE=4 SV=1
A0A087ZS88	38.83	1	1	1	136499	Uncharacterized protein OS=Apis mellifera OX=7460 GN=LOC724294 PE=4 SV=1
A0A087ZYD9	38.24	1	1	1	100139	Uncharacterized protein OS=Apis mellifera OX=7460 PE=4 SV=1
A0A088AE82	38.17	1	1	1	223397	Uncharacterized protein OS=Apis mellifera OX=7460 PE=4 SV=1
A0A087ZY87	37.71	1	1	1	241076	Uncharacterized protein OS=Apis mellifera OX=7460 GN=LOC726339 PE=4 SV=1
A0A088A5N2	37.67	1	1	1	316855	Uncharacterized protein OS=Apis mellifera OX=7460 PE=4 SV=1
A0A088A2J5	36.86	1	1	1	165476	Uncharacterized protein OS=Apis mellifera OX=7460 PE=4 SV=1
A0A087ZVL3	36.51	1	1	1	159119	Uncharacterized protein OS=Apis mellifera OX=7460 PE=4 SV=1
A0A087ZXL5	36.48	1	1	1	193112	Inositol hexakisphosphate and diphosphoinositol-pentakisphosphate kinase OS=Apis mellifera OX=7460 PE=3 SV=1
A0A087ZRM5	36.12	1	1	1	107432	RNA cytidine acetyltransferase OS=Apis mellifera OX=7460 PE=3 SV=1
A0A088ATJ5	35.92	1	1	1	173246	Uncharacterized protein OS=Apis mellifera OX=7460 PE=4 SV=1
A0A088A6X9	35.28	1	1	1	155778	Guanylate cyclase OS=Apis mellifera OX=7460 PE=4 SV=1
A0A087ZX61	35.2	1	1	1	165496	Uncharacterized protein OS=Apis mellifera OX=7460 GN=LOC412143 PE=4 SV=1
A0A088ARQ8	35.13	1	1	1	290058	Uncharacterized protein OS=Apis mellifera OX=7460 PE=4 SV=1
A0A088A1T9	34.69	1	1	1	116970	Uncharacterized protein OS=Apis mellifera OX=7460 PE=4 SV=1
A0A088AKB5	34.63	1	1	1	196206	Uncharacterized protein OS=Apis mellifera OX=7460 PE=4 SV=1
A0A088AJA1	34.58	1	1	1	121415	CIRL OS=Apis mellifera OX=7460 PE=3 SV=1
A0A088AR87	34.45	1	1	1	114436	Uncharacterized protein OS=Apis mellifera OX=7460 GN=LOC410511 PE=4 SV=1
A0A088AW73	34.31	1	1	1	186514	Uncharacterized protein OS=Apis mellifera OX=7460 PE=4 SV=1
A0A088AHS9	34.14	1	1	1	82992	Uncharacterized protein OS=Apis mellifera OX=7460 GN=ttv PE=3 SV=1
A0A087ZZK0	34.04	1	1	1	161040	Uncharacterized protein OS=Apis mellifera OX=7460 GN=LOC552026 PE=4 SV=1
A0A088AP33	33.99	1	1	1	76048	Uncharacterized protein OS=Apis mellifera OX=7460 GN=LOC412629 PE=4 SV=1
A0A088ALG5	33.98	1	1	1	121344	Odorant receptor OS=Apis mellifera OX=7460 PE=4 SV=1
A0A088AB38	33.7	1	1	1	163864	Uncharacterized protein OS=Apis mellifera OX=7460 GN=spn-E PE=4 SV=1
A0A088A4P3	33.25	1	1	1	72677	Uncharacterized protein OS=Apis mellifera OX=7460 GN=EDTP PE=4 SV=1
A0A087ZUI5	33.09	1	1	1	96188	Uncharacterized protein OS=Apis mellifera OX=7460 GN=LOC408923 PE=4 SV=1
A0A088AEK9	33.04	1	1	1	82417	Kinesin-like protein OS=Apis mellifera OX=7460 GN=kinesin-2A PE=3 SV=1
A0A088ACI4	32.5	1	1	1	137780	Uncharacterized protein OS=Apis mellifera OX=7460 GN=LOC409856 PE=4 SV=1
A0A088A9P7	32.29	1	1	1	356105	Uncharacterized protein OS=Apis mellifera OX=7460 PE=4 SV=1
A0A088AHZ6	32.2	1	1	1	154911	Uncharacterized protein OS=Apis mellifera OX=7460 PE=4 SV=1
A0A087ZS12	32.16	1	1	1	112883	Uncharacterized protein OS=Apis mellifera OX=7460 PE=4 SV=1
A0A088AT86	32.06	1	1	1	130842	Uncharacterized protein OS=Apis mellifera OX=7460 PE=4 SV=1
A0A088AVQ7	31.92	1	1	1	162331	Guanylate cyclase OS=Apis mellifera OX=7460 PE=3 SV=1
A0A088AN82	31.81	1	1	1	213669	Uncharacterized protein OS=Apis mellifera OX=7460 PE=4 SV=1
A0A0B5EBQ3	31.45	1	1	1	207670	Voltage dependent Ca2+ channel Cav2 subunit OS=Apis mellifera OX=7460 GN=Cav2a PE=2 SV=1
C9D7C2	31.45	1	1	1	215889	Voltage-dependent calcium channel type A subunit alpha-1 OS=Apis mellifera OX=7460 GN=CAC PE=2 SV=1
B9VMQ6	31.42	1	1	1	90895	Neuroligin 4 OS=Apis mellifera OX=7460 PE=2 SV=1
A0A088AHD5	31.38	1	1	1	108639	Phosphodiesterase OS=Apis mellifera OX=7460 GN=100577138 PE=3 SV=1
A0A088AU50	31.38	1	1	1	130898	Anion exchange protein OS=Apis mellifera OX=7460 PE=3 SV=1
A0A087ZQF3	31.18	1	1	1	107448	Uncharacterized protein OS=Apis mellifera OX=7460 PE=4 SV=1
A0A088AJM3	31.14	1	1	1	150861	Uncharacterized protein OS=Apis mellifera OX=7460 PE=4 SV=1
A0A087ZYS8	30.91	1	1	1	127873	Phospholipid-transporting ATPase OS=Apis mellifera OX=7460 PE=3 SV=1
A0A088AK73	30.83	1	1	1	153260	Uncharacterized protein OS=Apis mellifera OX=7460 PE=4 SV=1
A0A088AFH0	30.81	1	1	1	159745	Uncharacterized protein OS=Apis mellifera OX=7460 PE=4 SV=1
C9D7C5	30.68	1	1	1	232255	Sodium channel protein OS=Apis mellifera OX=7460 GN=PARA PE=2 SV=1
A0A087ZV49	30.68	1	1	1	236832	Sodium channel protein OS=Apis mellifera OX=7460 PE=3 SV=1
A0A087ZXA9	30.56	1	1	1	121604	Uncharacterized protein OS=Apis mellifera OX=7460 PE=4 SV=1
A0A088ASD6	30.2	1	1	1	124528	Uncharacterized protein OS=Apis mellifera OX=7460 GN=LOC726241 PE=4 SV=1
A0A088AVZ1	30.1	1	1	1	164028	Uncharacterized protein OS=Apis mellifera OX=7460 PE=3 SV=1
A0A088ABY1	29.93	1	1	1	161235	Uncharacterized protein OS=Apis mellifera OX=7460 GN=ird1 PE=4 SV=1
A0A088A151	29.57	1	1	1	112415	Uncharacterized protein OS=Apis mellifera OX=7460 GN=LOC413944 PE=3 SV=1
A0A087ZUU9	29.55	1	1	1	297776	Uncharacterized protein OS=Apis mellifera OX=7460 PE=4 SV=1
A0A088A5L9	29.51	1	1	1	149203	Uncharacterized protein OS=Apis mellifera OX=7460 GN=LOC724799 PE=4 SV=1
A0A088AUH0	29.31	1	1	1	122057	Uncharacterized protein OS=Apis mellifera OX=7460 PE=4 SV=1
A0A088ACX9	29.27	1	1	1	123825	Uncharacterized protein OS=Apis mellifera OX=7460 GN=mew PE=3 SV=1
A0A087ZRK5	29.14	1	1	1	139025	Uncharacterized protein OS=Apis mellifera OX=7460 GN=mle PE=4 SV=1
A0A088A1T8	28.86	1	1	1	74765	Uncharacterized protein OS=Apis mellifera OX=7460 GN=Nrk PE=3 SV=1
A0A087ZWH8	28.68	1	1	1	109215	Uncharacterized protein OS=Apis mellifera OX=7460 GN=lds PE=4 SV=1
A0A088A1N7	28.47	1	1	1	149509	Uncharacterized protein OS=Apis mellifera OX=7460 PE=4 SV=1
A0A088ARH9	28.39	1	1	1	108601	Uncharacterized protein OS=Apis mellifera OX=7460 GN=LOC411711 PE=4 SV=1
A0A088AKV1	28.38	1	1	1	93635	Uncharacterized protein OS=Apis mellifera OX=7460 PE=4 SV=1
A0A088A9U8	28.34	1	1	1	86208	Uncharacterized protein OS=Apis mellifera OX=7460 PE=4 SV=1
A0A088AM00	28.19	1	1	1	392929	Uncharacterized protein OS=Apis mellifera OX=7460 PE=4 SV=1
A0A088AJ40	28.09	1	1	1	134224	Uncharacterized protein OS=Apis mellifera OX=7460 GN=LOC551472 PE=4 SV=1
A0A088A701	28.06	1	1	1	272022	Uncharacterized protein OS=Apis mellifera OX=7460 PE=4 SV=1
A0A088AJ03	28.03	1	1	1	85749	Uncharacterized protein OS=Apis mellifera OX=7460 PE=4 SV=1
A0A088AQ25	27.91	1	1	1	184633	Uncharacterized protein OS=Apis mellifera OX=7460 PE=4 SV=1
A0A088AUY7	27.73	1	1	1	176087	Uncharacterized protein OS=Apis mellifera OX=7460 PE=4 SV=1
A0A088AP52	27.23	1	1	1	118372	Uncharacterized protein OS=Apis mellifera OX=7460 PE=4 SV=1
A0A088AW18	27.21	1	1	1	94477	Gamma-tubulin complex component OS=Apis mellifera OX=7460 GN=LOC726073 PE=3 SV=1
A0A088AAU9	27.13	1	1	1	308542	Uncharacterized protein OS=Apis mellifera OX=7460 PE=4 SV=1
A0A088A294	26.91	1	1	1	107023	Uncharacterized protein OS=Apis mellifera OX=7460 PE=4 SV=1
A0A088AEF9	26.9	1	1	1	202960	Uncharacterized protein OS=Apis mellifera OX=7460 PE=4 SV=1
A0A087ZPN1	26.77	1	1	1	103948	Uncharacterized protein OS=Apis mellifera OX=7460 GN=LOC412326 PE=4 SV=1
A0A088A3R1	26.75	1	1	1	177123	Uncharacterized protein OS=Apis mellifera OX=7460 GN=Gmap PE=4 SV=1
A0A088AKC6	26.75	1	1	1	178527	Uncharacterized protein OS=Apis mellifera OX=7460 PE=4 SV=1
A0A088AD84	26.43	1	1	1	130980	Uncharacterized protein OS=Apis mellifera OX=7460 GN=LOC413732 PE=4 SV=1
A0A087ZR13	26.39	1	1	1	248420	Uncharacterized protein OS=Apis mellifera OX=7460 GN=100578040 PE=4 SV=1
A0A088A9L7	26.35	1	1	1	110647	Uncharacterized protein OS=Apis mellifera OX=7460 PE=4 SV=1
A0A087ZRS3	26.33	1	1	1	98001	Uncharacterized protein OS=Apis mellifera OX=7460 PE=3 SV=1
A0A088A9X5	26.2	1	1	1	141254	Uncharacterized protein OS=Apis mellifera OX=7460 PE=4 SV=1
A0A088A301	26.18	1	1	1	76331	Uncharacterized protein OS=Apis mellifera OX=7460 GN=Gga PE=4 SV=1
A0A088ATC8	26.15	1	1	1	96574	Uncharacterized protein OS=Apis mellifera OX=7460 PE=4 SV=1
A0A087ZUI0	26.12	1	1	1	213948	Uncharacterized protein OS=Apis mellifera OX=7460 PE=4 SV=1
A0A088A3D5	26.11	1	1	1	201519	Uncharacterized protein OS=Apis mellifera OX=7460 PE=4 SV=1
A0A088AJS4	26.09	1	1	1	192521	Uncharacterized protein OS=Apis mellifera OX=7460 PE=4 SV=1
A0A088AUT2	149.18	2	9	9	1062694	Uncharacterized protein OS=Apis mellifera OX=7460 PE=4 SV=1
A0A088AF55	117.61	2	3	3	165781	Uncharacterized protein OS=Apis mellifera OX=7460 PE=4 SV=1
A0A088AFN5	110.06	2	2	2	202258	Uncharacterized protein OS=Apis mellifera OX=7460 PE=4 SV=1
A0A088A7U5	101.78	2	2	2	195498	Uncharacterized protein OS=Apis mellifera OX=7460 GN=MAST2 PE=4 SV=1
A0A087ZX89	90.66	2	3	3	189967	Uncharacterized protein OS=Apis mellifera OX=7460 PE=4 SV=1
A0A088ASI7	85.3	2	3	3	343519	Uncharacterized protein OS=Apis mellifera OX=7460 GN=LOC725503 PE=4 SV=1
A0A088A887	79.88	2	2	2	164160	Uncharacterized protein OS=Apis mellifera OX=7460 GN=LOC725118 PE=4 SV=1
A0A087ZNT1	78.71	2	1	1	80455	Uncharacterized protein OS=Apis mellifera OX=7460 GN=exo84 PE=4 SV=1
A0A088ALT2	76.33	2	2	2	130800	Cation-transporting ATPase OS=Apis mellifera OX=7460 GN=LOC412741 PE=3 SV=1
A0A088AAF9	75.96	2	1	1	65156	Uncharacterized protein OS=Apis mellifera OX=7460 PE=4 SV=1
A0A088AHR2	73.82	2	2	2	137460	Uncharacterized protein OS=Apis mellifera OX=7460 PE=4 SV=1
A0A088AH85	73.16	2	2	2	230028	Uncharacterized protein OS=Apis mellifera OX=7460 GN=Sbf PE=4 SV=1
A0A088AV24	72.59	2	2	2	161593	Uncharacterized protein OS=Apis mellifera OX=7460 PE=4 SV=1
A0A088AD66	72.15	2	2	2	136815	Uncharacterized protein OS=Apis mellifera OX=7460 PE=4 SV=1
A0A088AM47	69.8	2	2	2	152223	Diacylglycerol kinase OS=Apis mellifera OX=7460 PE=3 SV=1
A0A088ADJ1	67.5	2	3	3	172561	Uncharacterized protein OS=Apis mellifera OX=7460 PE=4 SV=1
A0A088A175	67.37	2	1	1	101683	Uncharacterized protein OS=Apis mellifera OX=7460 PE=3 SV=1
Q75QW7	67.37	2	1	1	103467	Metabotropic glutamate receptor OS=Apis mellifera OX=7460 GN=AmGluRA PE=2 SV=1
A0A088AMD3	66.45	2	1	1	91634	Uncharacterized protein OS=Apis mellifera OX=7460 PE=3 SV=1
A0A088ACS1	65.7	2	2	2	140263	Uncharacterized protein OS=Apis mellifera OX=7460 PE=3 SV=1
A0A087ZVG3	64.08	2	2	2	158525	Uncharacterized protein OS=Apis mellifera OX=7460 PE=4 SV=1
A0A087ZS98	63.91	2	2	2	206556	Uncharacterized protein OS=Apis mellifera OX=7460 PE=4 SV=1
A0A088ARI8	63.87	2	1	1	95662	Uncharacterized protein OS=Apis mellifera OX=7460 PE=4 SV=1
A0A088AS96	63.43	2	3	3	156050	Uncharacterized protein OS=Apis mellifera OX=7460 PE=4 SV=1
A0A088AJD6	63.14	2	1	1	92604	Uncharacterized protein OS=Apis mellifera OX=7460 PE=4 SV=1
A0A087ZX42	62.61	2	2	2	156865	Tyrosine-protein kinase receptor OS=Apis mellifera OX=7460 PE=3 SV=1
A0A088ARC9	62.49	2	1	1	140658	Cation-transporting ATPase OS=Apis mellifera OX=7460 PE=3 SV=1
A0A088A128	62.15	2	2	2	118708	Uncharacterized protein OS=Apis mellifera OX=7460 PE=4 SV=1
T1SGQ4	60.39	2	1	1	83567	cGMP-dependent protein kinase OS=Apis mellifera OX=7460 PE=2 SV=1
A0A088AAV1	60.32	2	1	1	89399	Uncharacterized protein OS=Apis mellifera OX=7460 GN=725599 PE=4 SV=1
A0A087ZNZ3	59.88	2	3	3	192103	Uncharacterized protein OS=Apis mellifera OX=7460 GN=sec71 PE=4 SV=1
A0A222LPT2	58.74	2	1	1	175793	Putative cyclin-dependent serine/threonine-protein kinase OS=Apis mellifera OX=7460 PE=2 SV=1
A0A087ZMS8	58.74	2	1	1	169791	Uncharacterized protein OS=Apis mellifera OX=7460 PE=4 SV=1
A0A088APN8	57.91	2	1	1	119745	Uncharacterized protein OS=Apis mellifera OX=7460 GN=LOC413510 PE=4 SV=1
A0A088A2M2	57.9	2	1	1	113987	Uncharacterized protein OS=Apis mellifera OX=7460 PE=3 SV=1
A0A088AEY8	57.52	2	1	1	106908	Uncharacterized protein OS=Apis mellifera OX=7460 PE=4 SV=1
A0A088AQL3	57.4	2	2	2	165490	Uncharacterized protein OS=Apis mellifera OX=7460 GN=lqfR PE=4 SV=1
A0A088AFE1	56.51	2	1	1	98294	Uncharacterized protein OS=Apis mellifera OX=7460 GN=wfs1 PE=4 SV=1
A0A088AAI5	56.09	2	1	1	45542	Uncharacterized protein OS=Apis mellifera OX=7460 GN=Catsup PE=4 SV=1
A0A088A6I0	55.94	2	1	1	72224	Uncharacterized protein OS=Apis mellifera OX=7460 GN=LOC412459 PE=4 SV=1
A0A088AHC0	55.87	2	1	1	79461	Solute carrier organic anion transporter family member OS=Apis mellifera OX=7460 GN=LOC409650 PE=3 SV=1
A0A088A5A3	55.63	2	2	2	151280	Uncharacterized protein OS=Apis mellifera OX=7460 GN=galectin2 PE=4 SV=1
A0A088AU05	55.2	2	1	1	144997	Uncharacterized protein OS=Apis mellifera OX=7460 PE=4 SV=1
A0A088A8W7	55.19	2	2	2	144691	Uncharacterized protein OS=Apis mellifera OX=7460 PE=4 SV=1
A0A087ZTJ8	53.61	2	1	1	96263	Uncharacterized protein OS=Apis mellifera OX=7460 PE=4 SV=1
A0A087ZPA7	53.21	2	1	1	75810	Sodium/hydrogen exchanger OS=Apis mellifera OX=7460 PE=3 SV=1
A0A088AVK6	52.94	2	2	2	129399	Uncharacterized protein OS=Apis mellifera OX=7460 GN=RabGAP12 PE=4 SV=1
A0A088A1I7	52.65	2	1	1	95436	Uncharacterized protein OS=Apis mellifera OX=7460 GN=LOC413108 PE=4 SV=1
A0A088AQ74	52.43	2	2	2	131323	Uncharacterized protein OS=Apis mellifera OX=7460 GN=726210 PE=4 SV=1
A0A088A4L7	52.38	2	1	1	71432	Signal recognition particle subunit SRP72 OS=Apis mellifera OX=7460 PE=3 SV=1
A0A088ASQ3	51.11	2	1	1	111491	Uncharacterized protein OS=Apis mellifera OX=7460 GN=elk PE=4 SV=1
A0A088AQ84	50.8	2	1	1	95535	Uncharacterized protein OS=Apis mellifera OX=7460 GN=LOC412681 PE=3 SV=1
A0A087ZR84	50.72	2	1	1	65407	Uncharacterized protein OS=Apis mellifera OX=7460 GN=LOC551314 PE=4 SV=1
A0A088A9G8	49.83	2	1	1	50870	Uncharacterized protein OS=Apis mellifera OX=7460 GN=LOC408622 PE=4 SV=1
A0A087ZZK7	49.83	2	1	1	57973	Uncharacterized protein OS=Apis mellifera OX=7460 PE=4 SV=1
A0A087ZTT2	49.34	2	1	1	109006	Uncharacterized protein OS=Apis mellifera OX=7460 GN=LOC724497 PE=4 SV=1
A0A088A8E8	48.5	2	1	1	94097	Serine/threonine-protein kinase OS=Apis mellifera OX=7460 GN=PKD PE=3 SV=1
A0A088ABM8	47.96	2	2	2	229253	Uncharacterized protein OS=Apis mellifera OX=7460 PE=4 SV=1
A0A087ZVG7	47.89	2	2	2	114221	Uncharacterized protein OS=Apis mellifera OX=7460 PE=4 SV=1
A0A088AM31	47.26	2	1	1	52825	Uncharacterized protein OS=Apis mellifera OX=7460 GN=Pnn PE=4 SV=1
A0A088A4M8	47.1	2	2	2	136461	Coronin OS=Apis mellifera OX=7460 PE=3 SV=1
A0A087ZU42	46.88	2	1	1	64426	Uncharacterized protein OS=Apis mellifera OX=7460 GN=LOC411141 PE=4 SV=1
A0A088AQD5	45.79	2	1	1	116349	Uncharacterized protein OS=Apis mellifera OX=7460 GN=Glurb PE=3 SV=1
A0A087ZTQ7	45.18	2	1	1	105492	Uncharacterized protein OS=Apis mellifera OX=7460 PE=4 SV=1
A0A088ACG9	45.04	2	1	1	67386	Uncharacterized protein OS=Apis mellifera OX=7460 GN=NUP54 PE=4 SV=1
A0A088AGZ0	44.81	2	1	1	102036	Uncharacterized protein OS=Apis mellifera OX=7460 PE=4 SV=1
A0A087ZQ39	44.55	2	1	1	169065	Uncharacterized protein OS=Apis mellifera OX=7460 GN=LOC409283 PE=4 SV=1
A0A088A2Q3	42.35	2	1	1	78242	Exocyst complex component 7 OS=Apis mellifera OX=7460 GN=551576 PE=3 SV=1
A0A088AC68	42.18	2	1	1	88229	Uncharacterized protein OS=Apis mellifera OX=7460 PE=4 SV=1
A0A088AU77	41.86	2	1	1	60381	Uncharacterized protein OS=Apis mellifera OX=7460 GN=409238 PE=4 SV=1
A0A088A016	41.42	2	1	1	79744	Spastin OS=Apis mellifera OX=7460 GN=spas PE=3 SV=1
A0A088A9E9	41.16	2	1	1	125671	Uncharacterized protein OS=Apis mellifera OX=7460 PE=4 SV=1
A0A088A3V9	40.72	2	1	1	73085	Beta-galactosidase OS=Apis mellifera OX=7460 GN=LOC725756 PE=3 SV=1
A0A088A7Y6	40.6	2	1	1	111573	Uncharacterized protein OS=Apis mellifera OX=7460 GN=LOC552221 PE=4 SV=1
A0A088ADG3	40.39	2	1	1	93741	Uncharacterized protein OS=Apis mellifera OX=7460 GN=LOC411730 PE=4 SV=1
A0A087ZRE2	39.54	2	1	1	86224	Uncharacterized protein OS=Apis mellifera OX=7460 PE=4 SV=1
A0A088AMI2	39.32	2	1	1	54158	Uncharacterized protein OS=Apis mellifera OX=7460 GN=LOC413305 PE=3 SV=1
A0A088AKF6	38.33	2	1	1	101198	Phosphodiesterase OS=Apis mellifera OX=7460 PE=3 SV=1
A0A088AIW2	38.17	2	1	1	98493	Uncharacterized protein OS=Apis mellifera OX=7460 PE=4 SV=1
A0A088A037	37.91	2	1	1	64837	Uncharacterized protein OS=Apis mellifera OX=7460 GN=LOC413653 PE=4 SV=1
A0A088AFK7	37.64	2	1	1	66195	Uncharacterized protein OS=Apis mellifera OX=7460 GN=m PE=4 SV=1
A0A088A0R5	37.58	2	1	1	133667	Uncharacterized protein OS=Apis mellifera OX=7460 PE=4 SV=1
Q38SD4	36.91	2	1	1	51499	Rh-like protein OS=Apis mellifera OX=7460 PE=2 SV=1
A0A088AP32	36.91	2	1	1	52890	Rh-like protein OS=Apis mellifera OX=7460 GN=LOC551604 PE=3 SV=1
A0A088ATC6	36.48	2	1	1	40673	Uncharacterized protein OS=Apis mellifera OX=7460 GN=LOC552660 PE=3 SV=1
A0A087ZWC3	36.4	2	1	1	105109	Uncharacterized protein OS=Apis mellifera OX=7460 GN=LOC551493 PE=4 SV=1
A0A088APW1	36.36	2	1	1	159834	Clustered mitochondria protein homolog OS=Apis mellifera OX=7460 GN=LOC552519 PE=3 SV=1
A0A088A818	36.33	2	1	1	69065	Uncharacterized protein OS=Apis mellifera OX=7460 GN=100576435 PE=4 SV=1
A0A088ART6	36.21	2	1	1	53311	Uncharacterized protein OS=Apis mellifera OX=7460 GN=LOC409424 PE=3 SV=1
A0A087ZRT3	35.83	2	1	1	71394	Uncharacterized protein OS=Apis mellifera OX=7460 PE=4 SV=1
A0A088AHH3	35.74	2	1	1	50464	Uncharacterized protein OS=Apis mellifera OX=7460 GN=LOC408283 PE=4 SV=1
A0A088AAU0	35.64	2	1	1	51115	Uncharacterized protein OS=Apis mellifera OX=7460 PE=4 SV=1
A0A088A0Q7	35.2	2	1	1	48792	Uncharacterized protein OS=Apis mellifera OX=7460 PE=4 SV=1
A0A088A7B9	34.97	2	1	1	69425	Uncharacterized protein OS=Apis mellifera OX=7460 GN=LOC411364 PE=4 SV=1
J7EQE2	34.58	2	1	1	92351	CIRL OS=Apis mellifera OX=7460 PE=3 SV=1
A0A087ZQ47	34.41	2	1	1	51794	Uncharacterized protein OS=Apis mellifera OX=7460 GN=LOC413815 PE=3 SV=1
A0A088AJV2	34.37	2	1	1	71645	Uncharacterized protein OS=Apis mellifera OX=7460 GN=GMCOX9 PE=4 SV=1
A0A088ARP7	33.68	2	1	1	86594	Uncharacterized protein OS=Apis mellifera OX=7460 GN=LOC412943 PE=4 SV=1
A0A087ZRM0	33.21	2	1	1	39892	Uncharacterized protein OS=Apis mellifera OX=7460 GN=tsl PE=4 SV=1
A0A088APH0	33.1	2	1	1	65084	Uncharacterized protein OS=Apis mellifera OX=7460 GN=mRpS30 PE=4 SV=1
A0A087ZSI4	33.05	2	1	1	40365	Uncharacterized protein OS=Apis mellifera OX=7460 PE=4 SV=1
A0A088AI75	32.84	2	1	1	149851	Diacylglycerol kinase OS=Apis mellifera OX=7460 GN=rdgA PE=3 SV=1
A0A088AEM9	32.78	2	1	1	60827	Uncharacterized protein OS=Apis mellifera OX=7460 PE=4 SV=1
A0A088AM85	32.71	2	1	1	111476	Chloride channel protein OS=Apis mellifera OX=7460 GN=LOC408467 PE=3 SV=1
A0A088ASI8	32.15	2	1	1	82793	Uncharacterized protein OS=Apis mellifera OX=7460 GN=LOC413515 PE=4 SV=1
A0A088AEM2	32.11	2	1	1	132597	Uncharacterized protein OS=Apis mellifera OX=7460 GN=IRS PE=4 SV=1
A0A088AF52	31.82	2	1	1	43930	Uncharacterized protein OS=Apis mellifera OX=7460 PE=4 SV=1
A0A087ZZD5	31.79	2	1	1	124935	Uncharacterized protein OS=Apis mellifera OX=7460 GN=LOC552605 PE=4 SV=1
A0A088A7P6	31.69	2	1	1	101257	Uncharacterized protein OS=Apis mellifera OX=7460 PE=4 SV=1
A0A087ZP88	31.65	2	1	1	59362	Uncharacterized protein OS=Apis mellifera OX=7460 GN=LOC727480 PE=4 SV=1
A0A0B5ELM6	31.45	2	1	1	70586	Voltage dependent Ca2+ channel Cav2 (Fragment) OS=Apis mellifera OX=7460 GN=Cav2 PE=2 SV=1
A0A0B5EIM9	31.45	2	1	1	73927	Voltage dependent Ca2+ channel Cav2 (Fragment) OS=Apis mellifera OX=7460 GN=Cav2 PE=2 SV=1
A0A0B5EBQ8	31.45	2	1	1	74492	Voltage dependent Ca2+ channel Cav2 (Fragment) OS=Apis mellifera OX=7460 GN=Cav2 PE=2 SV=1
A0A088AK20	31.45	2	1	1	82209	Uncharacterized protein OS=Apis mellifera OX=7460 PE=4 SV=1
A0A087ZVK4	31.42	2	1	1	44217	Uncharacterized protein OS=Apis mellifera OX=7460 PE=4 SV=1
A0A088AAX9	31.4	2	1	1	56969	Uncharacterized protein OS=Apis mellifera OX=7460 PE=4 SV=1
A0A088A8H3	31.31	2	1	1	55934	Uncharacterized protein OS=Apis mellifera OX=7460 GN=LOC412925 PE=4 SV=1
A0A088A7V6	31.12	2	1	1	66929	Uncharacterized protein OS=Apis mellifera OX=7460 GN=cdc14 PE=4 SV=1
A0A088A8E5	30.92	2	1	1	70000	Palmitoyltransferase OS=Apis mellifera OX=7460 PE=3 SV=1
A0A088A0L7	30.64	2	1	1	106754	Uncharacterized protein OS=Apis mellifera OX=7460 PE=4 SV=1
A0A088ARZ1	30.44	2	1	1	75077	Acyl-coenzyme A oxidase OS=Apis mellifera OX=7460 PE=3 SV=1
A0A088AMX6	30.41	2	1	1	54914	Uncharacterized protein OS=Apis mellifera OX=7460 GN=Sytalpha PE=4 SV=1
A0A088AMA7	30.32	2	1	1	65843	Uncharacterized protein OS=Apis mellifera OX=7460 GN=LOC410539 PE=3 SV=1
A0A088AFU1	29.96	2	1	1	59653	Uncharacterized protein OS=Apis mellifera OX=7460 GN=LOC724238 PE=4 SV=1
A0A088ASB6	29.95	2	1	1	83255	FACT complex subunit SSRP1 OS=Apis mellifera OX=7460 GN=Ssrp PE=3 SV=1
A0A088AK17	29.81	2	1	1	143405	Uncharacterized protein OS=Apis mellifera OX=7460 GN=LOC413388 PE=4 SV=1
A0A087ZVG4	29.73	2	1	1	93599	Uncharacterized protein OS=Apis mellifera OX=7460 GN=LOC409279 PE=3 SV=1
A0A087ZUF4	29.66	2	1	1	46715	Uncharacterized protein OS=Apis mellifera OX=7460 GN=LOC551879 PE=4 SV=1
D9MX52	29.64	2	1	1	62077	Fatty acyl-CoA reductase OS=Apis mellifera OX=7460 GN=LOC411983 PE=2 SV=1
A0A088AMR2	29.45	2	1	1	70851	Uncharacterized protein OS=Apis mellifera OX=7460 PE=4 SV=1
A0A088AG10	29.43	2	1	1	61141	Uncharacterized protein OS=Apis mellifera OX=7460 PE=4 SV=1
A0A088AKE7	29.32	2	1	1	87597	Uncharacterized protein OS=Apis mellifera OX=7460 GN=LOC410383 PE=4 SV=1
A0A088AC23	29	2	1	1	59273	Uncharacterized protein OS=Apis mellifera OX=7460 PE=4 SV=1
A0A088A4K4	28.87	2	1	1	80548	Transferrin OS=Apis mellifera OX=7460 PE=3 SV=1
A0A088ADS9	28.87	2	1	1	65273	Uncharacterized protein OS=Apis mellifera OX=7460 GN=LOC412416 PE=4 SV=1
A0A088AAG3	28.84	2	1	1	87127	Probable lysine-specific histone demethylase 1 OS=Apis mellifera OX=7460 GN=Su(var)3-3 PE=3 SV=1
A0A088A0G5	28.72	2	1	1	67703	Uncharacterized protein OS=Apis mellifera OX=7460 GN=100576667 PE=4 SV=1
A0A088A3U2	28.65	2	1	1	61608	Uncharacterized protein OS=Apis mellifera OX=7460 GN=LOC410639 PE=3 SV=1
A0A088AR62	28.58	2	1	1	166733	Uncharacterized protein OS=Apis mellifera OX=7460 PE=4 SV=1
A0A088AFT7	28.05	2	1	1	73967	Uncharacterized protein OS=Apis mellifera OX=7460 GN=LOC552162 PE=4 SV=1
A0A087ZX01	27.54	2	1	1	31866	Uncharacterized protein OS=Apis mellifera OX=7460 GN=LOC408876 PE=4 SV=1
A0A088ARX7	27.39	2	1	1	88215	Uncharacterized protein OS=Apis mellifera OX=7460 PE=4 SV=1
A0A087ZTR2	27.32	2	1	1	62182	Uncharacterized protein OS=Apis mellifera OX=7460 GN=LOC552332 PE=4 SV=1
A0A088AUB4	27.18	2	1	1	105803	Uncharacterized protein OS=Apis mellifera OX=7460 PE=4 SV=1
A0A088AW63	27.01	2	1	1	129906	Uncharacterized protein OS=Apis mellifera OX=7460 PE=4 SV=1
A0A087ZVD5	26.9	2	1	1	78018	Uncharacterized protein OS=Apis mellifera OX=7460 PE=4 SV=1
A0A088A585	26.6	2	1	1	62028	Uncharacterized protein OS=Apis mellifera OX=7460 GN=LOC409351 PE=4 SV=1
A0A088ASZ2	26.35	2	1	1	50655	Uncharacterized protein OS=Apis mellifera OX=7460 PE=4 SV=1
A0A088AFR1	26.32	2	1	1	82195	Uncharacterized protein OS=Apis mellifera OX=7460 PE=4 SV=1
A0A088A352	26.19	2	1	1	95953	DNA topoisomerase OS=Apis mellifera OX=7460 GN=LOC552787 PE=3 SV=1
A0A087ZNA7	26.1	2	1	1	86580	DNA-directed RNA polymerase subunit beta OS=Apis mellifera OX=7460 PE=3 SV=1
A0A088A0P3	26.06	2	1	1	60273	Uncharacterized protein OS=Apis mellifera OX=7460 GN=WASp PE=4 SV=1
A0A088A9L8	26.04	2	1	1	41180	Uncharacterized protein OS=Apis mellifera OX=7460 PE=4 SV=1
A0A087ZMR7	198.55	3	15	15	851375	Uncharacterized protein OS=Apis mellifera OX=7460 PE=4 SV=1
A0A088AGA1	164.44	3	5	5	280271	Uncharacterized protein OS=Apis mellifera OX=7460 PE=4 SV=1
A0A087ZWC0	135.13	3	4	4	215499	Uncharacterized protein OS=Apis mellifera OX=7460 PE=4 SV=1
A0A088AL06	131.7	3	4	4	295887	Uncharacterized protein OS=Apis mellifera OX=7460 GN=LOC409242 PE=4 SV=1
A0A087ZUH9	130.86	3	6	6	269784	Uncharacterized protein OS=Apis mellifera OX=7460 GN=CNOT1 PE=4 SV=1
A0A088AK33	130.42	3	4	4	287950	Uncharacterized protein OS=Apis mellifera OX=7460 PE=4 SV=1
A0A088A201	127.38	3	7	7	394991	Uncharacterized protein OS=Apis mellifera OX=7460 GN=LOC727221 PE=4 SV=1
A0A088AQ61	112.27	3	6	6	325802	Uncharacterized protein OS=Apis mellifera OX=7460 GN=LOC726358 PE=4 SV=1
A0A087ZZ40	107.15	3	4	4	278080	Uncharacterized protein OS=Apis mellifera OX=7460 PE=4 SV=1
A0A088AQX6	101.74	3	1	1	52054	Uncharacterized protein OS=Apis mellifera OX=7460 PE=3 SV=1
A0A088A5W0	100.59	3	2	2	152410	Uncharacterized protein OS=Apis mellifera OX=7460 PE=4 SV=1
A0A088AEN2	98.26	3	3	3	172311	Integrin alpha-PS2 OS=Apis mellifera OX=7460 PE=3 SV=1
A0A087ZYA0	97.36	3	2	2	182670	5'-3' exoribonuclease 1 OS=Apis mellifera OX=7460 PE=3 SV=1
A0A087ZWC1	96.88	3	5	5	219302	Uncharacterized protein OS=Apis mellifera OX=7460 GN=NUP205 PE=4 SV=1
A0A087ZPR6	93.4	3	2	2	105022	Uncharacterized protein OS=Apis mellifera OX=7460 GN=Rnp4F PE=4 SV=1
A0A088A206	93.23	3	3	3	156390	Uncharacterized protein OS=Apis mellifera OX=7460 GN=100576717 PE=4 SV=1
A0A087ZYD0	92.87	3	3	3	140858	Uncharacterized protein OS=Apis mellifera OX=7460 PE=4 SV=1
A0A088ABG0	91.87	3	1	1	56123	Uncharacterized protein OS=Apis mellifera OX=7460 GN=ebi PE=4 SV=1
A0A088AJY2	87.85	3	2	2	145696	Uncharacterized protein OS=Apis mellifera OX=7460 GN=LOC409752 PE=4 SV=1
A0A088A9U4	87.69	3	1	1	79943	Uncharacterized protein OS=Apis mellifera OX=7460 PE=4 SV=1
A0A087ZRI3	87	3	2	2	79655	Uncharacterized protein OS=Apis mellifera OX=7460 PE=4 SV=1
A0A088ASK2	86.5	3	2	2	104878	Uncharacterized protein OS=Apis mellifera OX=7460 PE=4 SV=1
A0A088A222	84.4	3	3	3	133707	Uncharacterized protein OS=Apis mellifera OX=7460 GN=Aats-val PE=3 SV=1
A0A088AUZ6	83.28	3	2	2	116971	Uncharacterized protein OS=Apis mellifera OX=7460 PE=4 SV=1
A0A088ALV2	82.05	3	3	3	217643	Uncharacterized protein OS=Apis mellifera OX=7460 PE=4 SV=1
A0A087ZMR5	80.34	3	3	3	231850	Uncharacterized protein OS=Apis mellifera OX=7460 PE=4 SV=1
A0A088AB90	77.04	3	1	1	52010	Uncharacterized protein OS=Apis mellifera OX=7460 PE=4 SV=1
A0A088AGL1	73.74	3	1	1	51739	Uncharacterized protein OS=Apis mellifera OX=7460 GN=Hk PE=4 SV=1
A0A088AFP7	73.6	3	1	1	54989	Uncharacterized protein OS=Apis mellifera OX=7460 PE=4 SV=1
A0A088A2G2	73	3	2	2	93911	Uncharacterized protein OS=Apis mellifera OX=7460 GN=LOC413512 PE=4 SV=1
A0A088A6S7	71.71	3	2	2	132752	Uncharacterized protein OS=Apis mellifera OX=7460 PE=4 SV=1
Q0GQR4	69.06	3	1	1	51791	Glutamate-gated chloride channel OS=Apis mellifera OX=7460 PE=2 SV=1
Q0GQR3	69.06	3	1	1	51807	Glutamate-gated chloride channel OS=Apis mellifera OX=7460 PE=2 SV=1
A0A088A291	68.95	3	2	2	110301	Uncharacterized protein OS=Apis mellifera OX=7460 GN=Cas PE=4 SV=1
A0A088ASB5	68.3	3	2	2	101567	Uncharacterized protein OS=Apis mellifera OX=7460 PE=4 SV=1
A0A088ABF9	66.52	3	1	1	64653	Non-specific serine/threonine protein kinase OS=Apis mellifera OX=7460 GN=Pak PE=4 SV=1
A0A087ZPT5	65.94	3	2	2	138133	Phosphodiesterase OS=Apis mellifera OX=7460 PE=3 SV=1
A0A087ZT96	65.38	3	2	2	102127	Uncharacterized protein OS=Apis mellifera OX=7460 PE=4 SV=1
A0A088AEZ6	65.23	3	2	2	91370	Uncharacterized protein OS=Apis mellifera OX=7460 PE=3 SV=1
A0A088AR05	65.16	3	1	1	78004	Uncharacterized protein OS=Apis mellifera OX=7460 PE=4 SV=1
A0A087ZPX1	65.09	3	2	2	92514	Uncharacterized protein OS=Apis mellifera OX=7460 GN=LOC409527 PE=4 SV=1
A0A088ABT5	63.84	3	1	1	37105	Uncharacterized protein OS=Apis mellifera OX=7460 GN=LOC551459 PE=4 SV=1
A0A088AR75	63.02	3	1	1	50717	Uncharacterized protein OS=Apis mellifera OX=7460 GN=LOC408464 PE=4 SV=1
A0A088AUF9	62.93	3	1	1	66680	Uncharacterized protein OS=Apis mellifera OX=7460 PE=4 SV=1
A0A088AFM1	62.91	3	1	1	49528	Uncharacterized protein OS=Apis mellifera OX=7460 PE=4 SV=1
A0A088AAC7	62.66	3	2	2	129873	Uncharacterized protein OS=Apis mellifera OX=7460 PE=4 SV=1
A0A088A0L4	62.44	3	2	2	128764	Uncharacterized protein OS=Apis mellifera OX=7460 GN=dre4 PE=4 SV=1
A0A088AJ72	61.81	3	1	1	76928	Uncharacterized protein OS=Apis mellifera OX=7460 GN=bgm PE=4 SV=1
A0A088AIQ1	61.61	3	2	2	80415	Uncharacterized protein OS=Apis mellifera OX=7460 GN=LOC552768 PE=4 SV=1
A0A087ZR03	61.57	3	1	1	57368	NADPH:adrenodoxin oxidoreductase mitochondrial OS=Apis mellifera OX=7460 PE=3 SV=1
A0A088A0C0	61.08	3	2	2	101542	Uncharacterized protein OS=Apis mellifera OX=7460 PE=4 SV=1
Q8SSX4	60.39	3	1	1	77299	cGMP-dependent protein kinase OS=Apis mellifera OX=7460 PE=2 SV=1
A0A088AEM0	60.39	3	1	1	73909	cGMP-dependent protein kinase foraging OS=Apis mellifera OX=7460 PE=4 SV=1
T1SH73	60.39	3	1	1	76811	cGMP-dependent protein kinase OS=Apis mellifera OX=7460 PE=2 SV=1
A0A088A7H9	59.51	3	3	3	139609	Uncharacterized protein OS=Apis mellifera OX=7460 PE=4 SV=1
A0A088A1V9	59.46	3	1	1	57526	Uncharacterized protein OS=Apis mellifera OX=7460 PE=4 SV=1
A0A088AEW1	59.05	3	1	1	62648	Uncharacterized protein OS=Apis mellifera OX=7460 GN=408517 PE=4 SV=1
A0A088AHA0	58.94	3	1	1	45267	Uncharacterized protein OS=Apis mellifera OX=7460 GN=LOC551447 PE=3 SV=1
A0A088A1R9	57.34	3	2	2	74389	Mitochondrial Rho GTPase OS=Apis mellifera OX=7460 PE=3 SV=1
A0A088A9T3	56.54	3	1	1	55245	Uncharacterized protein OS=Apis mellifera OX=7460 PE=4 SV=1
A0A087ZYX7	56.15	3	2	2	107617	Uncharacterized protein OS=Apis mellifera OX=7460 PE=4 SV=1
A0A088ACU2	55.24	3	1	1	47621	Uncharacterized protein OS=Apis mellifera OX=7460 GN=CTL1 PE=4 SV=1
A0A088APJ0	55.03	3	1	1	53715	Uncharacterized protein OS=Apis mellifera OX=7460 GN=LOC411145 PE=4 SV=1
A0A088ADN7	54.78	3	1	1	57205	Uncharacterized protein OS=Apis mellifera OX=7460 PE=4 SV=1
A0A088A4N4	54.7	3	1	1	62264	Uncharacterized protein OS=Apis mellifera OX=7460 GN=LOC413831 PE=4 SV=1
A0A088ACZ0	54.67	3	2	2	95587	Uncharacterized protein OS=Apis mellifera OX=7460 GN=LOC726065 PE=4 SV=1
A0A088A7M5	53.94	3	1	1	45404	Uncharacterized protein OS=Apis mellifera OX=7460 PE=4 SV=1
A0A088AQW7	53.72	3	1	1	40846	Uncharacterized protein OS=Apis mellifera OX=7460 GN=LOC552085 PE=4 SV=1
A0A088ACG1	53.05	3	1	1	74755	Uncharacterized protein OS=Apis mellifera OX=7460 GN=MTMR2 PE=4 SV=1
A0A088AM02	52.84	3	1	1	66616	Uncharacterized protein OS=Apis mellifera OX=7460 GN=LOC409671 PE=4 SV=1
A0A088ACF7	52.57	3	1	1	80079	Uncharacterized protein OS=Apis mellifera OX=7460 GN=Raf1 PE=4 SV=1
A0A088ATG8	51.76	3	2	2	157864	Uncharacterized protein OS=Apis mellifera OX=7460 GN=100578506 PE=3 SV=1
A0A087ZWW8	51.57	3	2	2	95055	Uncharacterized protein OS=Apis mellifera OX=7460 GN=LOC725192 PE=4 SV=1
A0A087ZP93	51.5	3	1	1	57910	Uncharacterized protein OS=Apis mellifera OX=7460 PE=4 SV=1
A0A088A439	50.97	3	1	1	75033	Uncharacterized protein OS=Apis mellifera OX=7460 GN=LOC552363 PE=4 SV=1
A0A088AC85	50.48	3	2	2	109463	Uncharacterized protein OS=Apis mellifera OX=7460 PE=4 SV=1
A0A088AUU1	50.14	3	2	2	116178	Uncharacterized protein OS=Apis mellifera OX=7460 GN=Ipo9 PE=4 SV=1
A0A088AKR5	50.02	3	1	1	49705	Uncharacterized protein OS=Apis mellifera OX=7460 PE=4 SV=1
A0A088ACB6	49.94	3	1	1	73413	Uncharacterized protein OS=Apis mellifera OX=7460 PE=4 SV=1
A0A088AVZ2	48.81	3	2	2	107972	Uncharacterized protein OS=Apis mellifera OX=7460 PE=4 SV=1
A0A087ZSK6	48.38	3	1	1	55467	Uncharacterized protein OS=Apis mellifera OX=7460 GN=LOC409154 PE=4 SV=1
A0A088AW21	48.18	3	1	1	76515	Uncharacterized protein OS=Apis mellifera OX=7460 GN=LOC551672 PE=4 SV=1
A0A088A5Z7	47.87	3	1	1	65292	Eukaryotic translation initiation factor 2A OS=Apis mellifera OX=7460 GN=LOC552764 PE=3 SV=1
A0A088ADK2	47.71	3	2	2	93033	Exocyst complex component OS=Apis mellifera OX=7460 PE=3 SV=1
A0A088AJJ4	47.44	3	1	1	40662	Uncharacterized protein OS=Apis mellifera OX=7460 GN=LOC551376 PE=4 SV=1
A0A088AI77	47.41	3	2	2	96715	Uncharacterized protein OS=Apis mellifera OX=7460 GN=As PE=4 SV=1
A0A087ZVX1	47.41	3	1	1	68039	Uncharacterized protein OS=Apis mellifera OX=7460 GN=LOC410732 PE=4 SV=1
A0A088A8Z9	47.14	3	1	1	77514	Uncharacterized protein OS=Apis mellifera OX=7460 PE=4 SV=1
A0A088AAM1	46.95	3	1	1	51545	Uncharacterized protein OS=Apis mellifera OX=7460 GN=LOC409876 PE=4 SV=1
A0A088A4D6	46.39	3	1	1	47536	Uncharacterized protein OS=Apis mellifera OX=7460 GN=LOC408724 PE=4 SV=1
A0A088ACD6	46.27	3	1	1	60985	Uncharacterized protein OS=Apis mellifera OX=7460 GN=LOC551043 PE=4 SV=1
A0A088A815	45.77	3	1	1	51862	Uncharacterized protein OS=Apis mellifera OX=7460 PE=4 SV=1
A0A088A4J1	45.4	3	1	1	46346	Uncharacterized protein OS=Apis mellifera OX=7460 PE=4 SV=1
A0A088A487	45.11	3	2	2	80257	Uncharacterized protein OS=Apis mellifera OX=7460 PE=4 SV=1
A0A087ZP24	44.51	3	1	1	51804	Uncharacterized protein OS=Apis mellifera OX=7460 GN=eIF2B-gamma PE=4 SV=1
A0A088ARC6	44.38	3	1	1	59933	Uncharacterized protein OS=Apis mellifera OX=7460 PE=4 SV=1
A0A0B4J2N6	44.11	3	1	1	60419	Uncharacterized protein OS=Apis mellifera OX=7460 GN=LOC409199 PE=3 SV=1
A0A088AJL4	44.1	3	1	1	59987	Uncharacterized protein OS=Apis mellifera OX=7460 GN=LOC726625 PE=4 SV=1
A0A087ZXK6	43.71	3	1	1	68756	alpha-1 2-Mannosidase OS=Apis mellifera OX=7460 GN=LOC413579 PE=3 SV=1
A0A088A343	43.29	3	1	1	49320	Uncharacterized protein OS=Apis mellifera OX=7460 PE=4 SV=1
A0A088APV8	43	3	1	1	41590	Uncharacterized protein OS=Apis mellifera OX=7460 GN=LOC552590 PE=4 SV=1
A0A088AJD4	42.98	3	1	1	49217	Uncharacterized protein OS=Apis mellifera OX=7460 PE=4 SV=1
A0A087ZY13	42.65	3	1	1	75438	Uncharacterized protein OS=Apis mellifera OX=7460 PE=4 SV=1
A0A088ACF5	42.49	3	1	1	54796	Uncharacterized protein OS=Apis mellifera OX=7460 PE=4 SV=1
A0A087ZSU1	42.17	3	2	2	159831	Uncharacterized protein OS=Apis mellifera OX=7460 PE=4 SV=1
A0A088AFG4	42.02	3	1	1	76230	Uncharacterized protein OS=Apis mellifera OX=7460 PE=4 SV=1
A0A087ZWF1	41.61	3	1	1	68809	Uncharacterized protein OS=Apis mellifera OX=7460 GN=Taf6 PE=4 SV=1
A0A088AJ10	41.46	3	1	1	47695	Uncharacterized protein OS=Apis mellifera OX=7460 GN=LOC409639 PE=4 SV=1
A0A087ZWE5	40.73	3	1	1	100334	Exocyst complex component 2 OS=Apis mellifera OX=7460 GN=sec5 PE=3 SV=1
A0A088ADM6	40.38	3	1	1	53424	Uncharacterized protein OS=Apis mellifera OX=7460 GN=LOC550748 PE=4 SV=1
A0A088A835	39.92	3	1	1	49203	Uncharacterized protein OS=Apis mellifera OX=7460 GN=100577273 PE=4 SV=1
A0A120HXK8	39.92	3	1	1	49203	Temperature induced paralysis locus E-like protein 3 OS=Apis mellifera OX=7460 PE=2 SV=1
A0A088AFF3	39.23	3	1	1	56559	Uncharacterized protein OS=Apis mellifera OX=7460 PE=4 SV=1
A0A088ADC3	39.22	3	1	1	53322	Uncharacterized protein OS=Apis mellifera OX=7460 PE=4 SV=1
A0A088AP84	38.48	3	1	1	42862	Uncharacterized protein OS=Apis mellifera OX=7460 GN=LOC411304 PE=4 SV=1
A0A088A185	36.46	3	1	1	45138	Uncharacterized protein OS=Apis mellifera OX=7460 PE=3 SV=1
A0A087ZU20	36.24	3	1	1	43586	Uncharacterized protein OS=Apis mellifera OX=7460 PE=4 SV=1
A0A087ZYP8	36.15	3	1	1	62478	Uncharacterized protein OS=Apis mellifera OX=7460 PE=4 SV=1
A0A087ZYD4	35.74	3	1	1	61993	Nicalin OS=Apis mellifera OX=7460 GN=Ncln PE=3 SV=1
A0A088AMW8	35.55	3	1	1	34158	Uncharacterized protein OS=Apis mellifera OX=7460 GN=LOC551045 PE=4 SV=1
A0A088A3P3	35.46	3	1	1	47625	Uncharacterized protein OS=Apis mellifera OX=7460 GN=mRpL38 PE=4 SV=1
A0A088AA94	35.34	3	1	1	67818	Transmembrane 9 superfamily member OS=Apis mellifera OX=7460 PE=3 SV=1
A0A088ANE4	34.97	3	1	1	49320	Uncharacterized protein OS=Apis mellifera OX=7460 GN=727071 PE=4 SV=1
A0A087ZTN6	34.39	3	1	1	71107	Protein arginine N-methyltransferase OS=Apis mellifera OX=7460 GN=csul PE=3 SV=1
A0A088A780	34.3	3	1	1	43770	Uncharacterized protein OS=Apis mellifera OX=7460 PE=4 SV=1
A0A087ZY71	34.28	3	1	1	31111	Uncharacterized protein OS=Apis mellifera OX=7460 GN=LOC411391 PE=4 SV=1
A0A088AVJ1	34.26	3	1	1	36167	Uncharacterized protein OS=Apis mellifera OX=7460 GN=LOC410952 PE=3 SV=1
A0A087ZQL8	33.09	3	1	1	59287	RBR-type E3 ubiquitin transferase OS=Apis mellifera OX=7460 GN=LOC413468 PE=3 SV=1
A0A088A8H6	33.07	3	1	1	57983	Uncharacterized protein OS=Apis mellifera OX=7460 PE=3 SV=1
A0A088AHI3	33	3	1	1	59218	Uncharacterized protein OS=Apis mellifera OX=7460 PE=4 SV=1
A0A088AQC9	32.57	3	1	1	73072	Uncharacterized protein OS=Apis mellifera OX=7460 GN=dsh PE=4 SV=1
A0A088AC50	32.56	3	1	1	68694	Uncharacterized protein OS=Apis mellifera OX=7460 PE=4 SV=1
A0A088ASW7	32.45	3	1	1	85935	Uncharacterized protein OS=Apis mellifera OX=7460 GN=LOC551822 PE=3 SV=1
A0A088A2F2	31.89	3	1	1	50588	Uncharacterized protein OS=Apis mellifera OX=7460 PE=4 SV=1
A0A0B5EJZ7	31.45	3	1	1	65137	Voltage dependent Ca2+ channel Cav2 (Fragment) OS=Apis mellifera OX=7460 GN=Cav2 PE=2 SV=1
A0A088AGJ9	31.32	3	1	1	39352	Uncharacterized protein OS=Apis mellifera OX=7460 GN=100576418 PE=4 SV=1
A0A088ALT4	31.29	3	1	1	51613	Uncharacterized protein OS=Apis mellifera OX=7460 PE=3 SV=1
A0A088AEA3	30.97	3	1	1	44731	Uncharacterized protein OS=Apis mellifera OX=7460 GN=mRpS29 PE=4 SV=1
A0A088AH79	30.96	3	1	1	79459	Uncharacterized protein OS=Apis mellifera OX=7460 GN=LOC412077 PE=4 SV=1
A0A088ABN6	30.54	3	1	1	65738	Uncharacterized protein OS=Apis mellifera OX=7460 GN=100577578 PE=4 SV=1
Q0GQR2	30.3	3	1	1	48626	Histamine-gated chloride channel OS=Apis mellifera OX=7460 GN=Hiscl1 PE=2 SV=1
A0A1B1QGE4	30.3	3	1	1	47438	Histamine-gated chloride channel 1 OS=Apis mellifera OX=7460 GN=Hiscl1 PE=2 SV=1
A0A088ABX3	30.06	3	1	1	40375	Peptidylprolyl isomerase OS=Apis mellifera OX=7460 GN=FK506-bp1 PE=4 SV=1
A0A087ZQ86	29.94	3	1	1	77590	Uncharacterized protein OS=Apis mellifera OX=7460 GN=LOC409206 PE=4 SV=1
A0A087ZT40	29.88	3	1	1	60726	Uncharacterized protein OS=Apis mellifera OX=7460 GN=LOC409912 PE=4 SV=1
A0A088AFQ1	29.76	3	1	1	73404	Uncharacterized protein OS=Apis mellifera OX=7460 GN=LOC411091 PE=4 SV=1
A0A088A454	29.63	3	1	1	35868	Uncharacterized protein OS=Apis mellifera OX=7460 GN=LOC413173 PE=4 SV=1
A0A087ZYB6	29.45	3	1	1	58809	Uncharacterized protein OS=Apis mellifera OX=7460 PE=4 SV=1
A0A087ZQ06	29.2	3	1	1	60225	Uncharacterized protein OS=Apis mellifera OX=7460 GN=LOC411407 PE=4 SV=1
A0A087ZUC2	29.01	3	1	1	64513	Uncharacterized protein OS=Apis mellifera OX=7460 PE=4 SV=1
A0A088ARF6	28.9	3	1	1	38662	Uncharacterized protein OS=Apis mellifera OX=7460 PE=4 SV=1
A0A088AV05	28.74	3	1	1	41203	Uncharacterized protein OS=Apis mellifera OX=7460 GN=LOC409087 PE=4 SV=1
A0A088AQD9	28.72	3	1	1	45772	Uncharacterized protein OS=Apis mellifera OX=7460 GN=LOC551812 PE=3 SV=1
A0A088AUH3	28.69	3	1	1	79959	Uncharacterized protein OS=Apis mellifera OX=7460 GN=Rtf1 PE=4 SV=1
A0A088AHV5	28.65	3	1	1	44694	Uncharacterized protein OS=Apis mellifera OX=7460 PE=3 SV=1
A0A088A362	28.31	3	1	1	59709	Uncharacterized protein OS=Apis mellifera OX=7460 GN=LOC408866 PE=4 SV=1
A0A087ZX38	27.75	3	1	1	75124	Kinesin-like protein OS=Apis mellifera OX=7460 PE=3 SV=1
A0A087ZPC4	27.46	3	1	1	37712	Uncharacterized protein OS=Apis mellifera OX=7460 GN=LOC552170 PE=4 SV=1
A0A088A6V5	27.34	3	1	1	44444	Uncharacterized protein OS=Apis mellifera OX=7460 GN=107964206 PE=4 SV=1
A0A088AAK6	27.28	3	1	1	44252	Uncharacterized protein OS=Apis mellifera OX=7460 GN=LOC551499 PE=4 SV=1
A0A087ZXL8	27.19	3	1	1	31686	Uncharacterized protein OS=Apis mellifera OX=7460 GN=LOC552361 PE=3 SV=1
A0A087ZY49	27.19	3	1	1	61088	Uncharacterized protein OS=Apis mellifera OX=7460 GN=LOC411265 PE=4 SV=1
A0A088AN06	26.62	3	1	1	21874	Uncharacterized protein OS=Apis mellifera OX=7460 GN=LOC552727 PE=4 SV=1
A0A087ZSS5	26.48	3	1	1	50509	Uncharacterized protein OS=Apis mellifera OX=7460 GN=Ets97D-like PE=3 SV=1
A0A088A051	26.27	3	1	1	33290	Uncharacterized protein OS=Apis mellifera OX=7460 GN=LOC413711 PE=3 SV=1
A0A088AK76	176.35	4	13	13	605044	Uncharacterized protein OS=Apis mellifera OX=7460 GN=LOC412281 PE=4 SV=1
A0A088ABA5	171.61	4	9	9	293874	Uncharacterized protein OS=Apis mellifera OX=7460 GN=LOC409457 PE=4 SV=1
A0A088AQQ5	117.18	4	3	3	155450	Uncharacterized protein OS=Apis mellifera OX=7460 PE=4 SV=1
A0A087ZUE2	109.57	4	6	6	200485	Uncharacterized protein OS=Apis mellifera OX=7460 GN=TEP7 PE=4 SV=1
A0A088AHR7	108.18	4	4	4	89833	Uncharacterized protein OS=Apis mellifera OX=7460 PE=4 SV=1
A0A087ZQZ3	108.17	4	3	3	115102	Uncharacterized protein OS=Apis mellifera OX=7460 PE=4 SV=1
A0A088A0F5	106.91	4	3	3	101520	Uncharacterized protein OS=Apis mellifera OX=7460 GN=MTA1-like PE=4 SV=1
A0A087ZRN5	106.46	4	3	3	165117	Uncharacterized protein OS=Apis mellifera OX=7460 PE=4 SV=1
A0A088AR64	105.95	4	4	4	113391	Uncharacterized protein OS=Apis mellifera OX=7460 PE=4 SV=1
A0A088ALU8	104.52	4	2	2	78932	Uncharacterized protein OS=Apis mellifera OX=7460 GN=LOC551163 PE=4 SV=1
A0A087ZPY4	104.4	4	3	3	147175	Uncharacterized protein OS=Apis mellifera OX=7460 PE=4 SV=1
A0A088AFA9	104.35	4	3	3	121806	Uncharacterized protein OS=Apis mellifera OX=7460 PE=3 SV=1
A0A088ABB1	103.35	4	2	2	65330	Uncharacterized protein OS=Apis mellifera OX=7460 PE=4 SV=1
A0A088A392	102.48	4	3	3	99418	Kinesin-like protein OS=Apis mellifera OX=7460 PE=3 SV=1
A0A087ZMU0	100.45	4	5	5	156165	Uncharacterized protein OS=Apis mellifera OX=7460 PE=4 SV=1
A0A088APW2	98.65	4	2	2	103812	Uncharacterized protein OS=Apis mellifera OX=7460 PE=4 SV=1
A0A088AUQ4	97.39	4	2	2	106256	Uncharacterized protein OS=Apis mellifera OX=7460 PE=4 SV=1
A0A088A7Q3	96.58	4	2	2	80082	Uncharacterized protein OS=Apis mellifera OX=7460 GN=Hdc PE=4 SV=1
A0A087ZQ07	96.22	4	3	3	143378	Uncharacterized protein OS=Apis mellifera OX=7460 PE=4 SV=1
A0A088A2Y3	96.12	4	2	2	72212	Uncharacterized protein OS=Apis mellifera OX=7460 PE=4 SV=1
A0A088ARN5	96.1	4	2	2	88406	Uncharacterized protein OS=Apis mellifera OX=7460 GN=LOC413633 PE=4 SV=1
A0A088ANZ6	95.65	4	3	3	101531	Uncharacterized protein OS=Apis mellifera OX=7460 GN=LOC409186 PE=4 SV=1
A0A088A4P8	94.64	4	3	3	115464	Uncharacterized protein OS=Apis mellifera OX=7460 PE=4 SV=1
A0A088ACG3	93.58	4	3	3	122033	Uncharacterized protein OS=Apis mellifera OX=7460 PE=4 SV=1
A0A087ZZD3	92	4	2	2	99297	Uncharacterized protein OS=Apis mellifera OX=7460 GN=Unr PE=4 SV=1
A0A088AJ00	91.9	4	4	4	186678	Uncharacterized protein OS=Apis mellifera OX=7460 PE=4 SV=1
A0A088AUG5	90.69	4	2	2	122100	Uncharacterized protein OS=Apis mellifera OX=7460 GN=LOC552044 PE=4 SV=1
A0A087ZTK8	90.27	4	2	2	70216	Uncharacterized protein OS=Apis mellifera OX=7460 PE=4 SV=1
A0A088AQ77	90.22	4	2	2	94586	Uncharacterized protein OS=Apis mellifera OX=7460 GN=Tsf2 PE=4 SV=1
A0A088AJ80	90.17	4	4	4	209798	Uncharacterized protein OS=Apis mellifera OX=7460 PE=4 SV=1
A0A088ATI8	89.21	4	2	2	108813	Uncharacterized protein OS=Apis mellifera OX=7460 GN=Hip1 PE=4 SV=1
A0A088A280	88.98	4	2	2	91500	Uncharacterized protein OS=Apis mellifera OX=7460 GN=LOC413046 PE=4 SV=1
A0A088AAC0	88.62	4	3	3	131038	Uncharacterized protein OS=Apis mellifera OX=7460 GN=LOC412607 PE=4 SV=1
A0A087ZP04	87.08	4	2	2	71779	Uncharacterized protein OS=Apis mellifera OX=7460 GN=LOC413252 PE=4 SV=1
A0A087ZWD2	86.51	4	2	2	80453	Uncharacterized protein OS=Apis mellifera OX=7460 GN=LOC409265 PE=4 SV=1
A0A087ZNQ7	85.56	4	3	3	138688	Uncharacterized protein OS=Apis mellifera OX=7460 GN=LOC551462 PE=4 SV=1
A0A087ZTU0	85.21	4	4	4	185292	Uncharacterized protein OS=Apis mellifera OX=7460 GN=RhoGAPp190 PE=4 SV=1
A0A088AAE7	84.16	4	3	3	96705	Uncharacterized protein OS=Apis mellifera OX=7460 PE=4 SV=1
A0A088A018	83.37	4	3	3	147657	Uncharacterized protein OS=Apis mellifera OX=7460 PE=3 SV=1
Q9NG02	83.37	4	1	1	44651	G-protein coupled receptor OS=Apis mellifera OX=7460 GN=tyr1 PE=2 SV=1
A0A088AR11	82.97	4	1	1	40801	Uncharacterized protein OS=Apis mellifera OX=7460 PE=4 SV=1
A0A088A8J2	82.79	4	3	3	130780	Uncharacterized protein OS=Apis mellifera OX=7460 PE=4 SV=1
A0A088AGR0	80.81	4	2	2	76384	Uncharacterized protein OS=Apis mellifera OX=7460 GN=GckIII PE=4 SV=1
A0A087ZZ79	78.6	4	2	2	117879	Alpha-mannosidase OS=Apis mellifera OX=7460 PE=3 SV=1
A0A088AKR2	76.51	4	1	1	51652	Uncharacterized protein OS=Apis mellifera OX=7460 GN=LOC725592 PE=4 SV=1
A0A088ADA2	72.89	4	1	1	82401	Uncharacterized protein OS=Apis mellifera OX=7460 GN=LOC409178 PE=4 SV=1
A0A087ZV36	71.53	4	1	1	42141	Uncharacterized protein OS=Apis mellifera OX=7460 GN=LOC409696 PE=4 SV=1
A0A087ZNK8	71.32	4	1	1	33721	Uncharacterized protein OS=Apis mellifera OX=7460 PE=4 SV=1
A0A088A3K8	71.13	4	1	1	44084	Uncharacterized protein OS=Apis mellifera OX=7460 GN=LOC410730 PE=4 SV=1
A0A088A142	69.47	4	1	1	34133	Uncharacterized protein OS=Apis mellifera OX=7460 PE=4 SV=1
A0A088AFZ4	69.26	4	3	3	148539	Uncharacterized protein OS=Apis mellifera OX=7460 PE=4 SV=1
A0A088A6Q8	69.26	4	2	2	65831	Uncharacterized protein OS=Apis mellifera OX=7460 GN=LOC410922 PE=4 SV=1
A0A088A819	69.15	4	2	2	96271	Uncharacterized protein OS=Apis mellifera OX=7460 PE=4 SV=1
A0A088A8W5	67.39	4	1	1	49318	Uncharacterized protein OS=Apis mellifera OX=7460 GN=Rga PE=4 SV=1
A0A088AFE8	66.37	4	1	1	58356	Uncharacterized protein OS=Apis mellifera OX=7460 GN=SF3A3 PE=4 SV=1
A0A088AJH6	65.78	4	1	1	64905	Uncharacterized protein OS=Apis mellifera OX=7460 GN=LOC412299 PE=3 SV=1
A0A088AP70	65.48	4	1	1	32616	Uncharacterized protein OS=Apis mellifera OX=7460 GN=LOC410012 PE=4 SV=1
A0A088A8G2	63.05	4	1	1	42441	Uncharacterized protein OS=Apis mellifera OX=7460 GN=LOC413120 PE=4 SV=1
A0A088ANP6	62.82	4	2	2	70037	Uncharacterized protein OS=Apis mellifera OX=7460 GN=100578513 PE=4 SV=1
A0A088AIT0	62.64	4	1	1	39320	Uncharacterized protein OS=Apis mellifera OX=7460 PE=4 SV=1
A0A088AMU0	62.44	4	1	1	47530	Uncharacterized protein OS=Apis mellifera OX=7460 GN=HtrA2 PE=4 SV=1
A0A088AJG4	61.94	4	1	1	41717	Uncharacterized protein OS=Apis mellifera OX=7460 GN=LOC413885 PE=4 SV=1
A0A088AF87	61.46	4	2	2	60187	Uncharacterized protein OS=Apis mellifera OX=7460 GN=slmb PE=4 SV=1
A0A088ABZ9	61.15	4	2	2	74054	Uncharacterized protein OS=Apis mellifera OX=7460 GN=casp PE=4 SV=1
A0A088A592	60.2	4	2	2	69710	Uncharacterized protein OS=Apis mellifera OX=7460 PE=4 SV=1
A0A088A3T5	59.71	4	1	1	42966	Uncharacterized protein OS=Apis mellifera OX=7460 PE=4 SV=1
A0A088AM99	59.14	4	1	1	50330	Uncharacterized protein OS=Apis mellifera OX=7460 PE=3 SV=1
A0A087ZRH9	58.59	4	2	2	100288	Uncharacterized protein OS=Apis mellifera OX=7460 PE=3 SV=1
A0A088AH48	58.36	4	2	2	97424	Uncharacterized protein OS=Apis mellifera OX=7460 PE=4 SV=1
A0A088AH38	58.25	4	1	1	37418	Uncharacterized protein OS=Apis mellifera OX=7460 PE=4 SV=1
A0A087ZSU4	56.81	4	1	1	52389	Uncharacterized protein OS=Apis mellifera OX=7460 GN=Sec61alpha PE=3 SV=1
A0A088ABS5	56.53	4	1	1	49612	Uncharacterized protein OS=Apis mellifera OX=7460 PE=3 SV=1
I2CJJ5	56.09	4	1	1	26531	Thioredoxin peroxidise 1 (Fragment) OS=Apis mellifera OX=7460 GN=GB12946 PE=4 SV=1
I2CJL9	56.09	4	1	1	26513	Thioredoxin peroxidise 1 (Fragment) OS=Apis mellifera OX=7460 GN=GB12946 PE=4 SV=1
A0A088AG52	55.22	4	1	1	46042	Uncharacterized protein OS=Apis mellifera OX=7460 PE=4 SV=1
A0A087ZZ30	55.11	4	2	2	91913	Uncharacterized protein OS=Apis mellifera OX=7460 GN=100578879 PE=4 SV=1
A0A088ACE5	55.06	4	3	3	100262	Uncharacterized protein OS=Apis mellifera OX=7460 PE=4 SV=1
G5D4Z3	55.03	4	1	1	33021	Nischarin-like protein (Fragment) OS=Apis mellifera OX=7460 PE=4 SV=1
G5D4X4	55.03	4	1	1	33039	Nischarin-like protein (Fragment) OS=Apis mellifera OX=7460 PE=4 SV=1
G5D4X6	55.03	4	1	1	33035	Nischarin-like protein (Fragment) OS=Apis mellifera OX=7460 PE=4 SV=1
I2CM12	55.03	4	1	1	33154	Nischarin-like protein (Fragment) OS=Apis mellifera OX=7460 GN=GB20077 PE=4 SV=1
I2CM23	55.03	4	1	1	33152	Nischarin-like protein (Fragment) OS=Apis mellifera OX=7460 GN=GB20077 PE=4 SV=1
G5D4Y5	55.03	4	1	1	33126	Nischarin-like protein (Fragment) OS=Apis mellifera OX=7460 PE=4 SV=1
I2CM31	55.03	4	1	1	33152	Nischarin-like protein (Fragment) OS=Apis mellifera OX=7460 GN=GB20077 PE=4 SV=1
G5D4W3	55.03	4	1	1	33168	Nischarin-like protein (Fragment) OS=Apis mellifera OX=7460 PE=4 SV=1
G5D4Y6	55.03	4	1	1	33140	Nischarin-like protein (Fragment) OS=Apis mellifera OX=7460 PE=4 SV=1
I2CLZ8	55.03	4	1	1	33134	Nischarin-like protein (Fragment) OS=Apis mellifera OX=7460 GN=GB20077 PE=4 SV=1
G5D4Y4	55.03	4	1	1	33269	Nischarin-like protein (Fragment) OS=Apis mellifera OX=7460 PE=4 SV=1
G5D4Y3	55.03	4	1	1	33255	Nischarin-like protein (Fragment) OS=Apis mellifera OX=7460 PE=4 SV=1
G5D4Z1	55.03	4	1	1	33368	Nischarin-like protein (Fragment) OS=Apis mellifera OX=7460 PE=4 SV=1
G5D4Z2	55.03	4	1	1	33382	Nischarin-like protein (Fragment) OS=Apis mellifera OX=7460 PE=4 SV=1
A0A088AAA6	54.92	4	2	2	98972	Uncharacterized protein OS=Apis mellifera OX=7460 PE=4 SV=1
A0A088AFJ4	54.87	4	2	2	86938	Uncharacterized protein OS=Apis mellifera OX=7460 PE=4 SV=1
A0A088A5F6	54.45	4	1	1	79316	Uncharacterized protein OS=Apis mellifera OX=7460 GN=LOC552625 PE=4 SV=1
A0A088A0E6	53.51	4	1	1	59682	Uncharacterized protein OS=Apis mellifera OX=7460 GN=LOC411105 PE=4 SV=1
A0A088A1P1	53.31	4	1	1	42865	Uncharacterized protein OS=Apis mellifera OX=7460 GN=LOC410338 PE=4 SV=1
A0A087ZZN6	53.14	4	2	2	72308	Uncharacterized protein OS=Apis mellifera OX=7460 GN=atl PE=4 SV=1
A0A088AEY2	52.01	4	1	1	34799	Uncharacterized protein OS=Apis mellifera OX=7460 PE=4 SV=1
A0A088A505	51.71	4	2	1	57980	Tyrosine-protein kinase OS=Apis mellifera OX=7460 PE=3 SV=1
A0A088A7K9	50.46	4	1	1	43943	Uncharacterized protein OS=Apis mellifera OX=7460 PE=3 SV=1
A0A088A1Z5	49.88	4	2	2	73030	Uncharacterized protein OS=Apis mellifera OX=7460 GN=ABC10 PE=4 SV=1
A0A0B4J2L9	49.34	4	1	1	25121	GTP:AMP phosphotransferase mitochondrial OS=Apis mellifera OX=7460 GN=Adk3 PE=3 SV=1
A0A087ZQU8	48.96	4	2	2	60162	Uncharacterized protein OS=Apis mellifera OX=7460 GN=ric8a PE=4 SV=1
A0A088A190	46.5	4	1	1	39192	Uncharacterized protein OS=Apis mellifera OX=7460 GN=LOC552715 PE=4 SV=1
A0A088AQ83	44.78	4	1	1	39384	Uncharacterized protein OS=Apis mellifera OX=7460 PE=4 SV=1
A0A088AHE4	44.78	4	1	1	47727	Uncharacterized protein OS=Apis mellifera OX=7460 GN=mRpL37 PE=4 SV=1
A0A087ZWB4	44.48	4	1	1	53976	Uncharacterized protein OS=Apis mellifera OX=7460 GN=LOC413336 PE=4 SV=1
A0A088AQ65	44.46	4	1	1	55586	Uncharacterized protein OS=Apis mellifera OX=7460 PE=4 SV=1
A0A087ZWF3	44.38	4	1	1	28724	Uncharacterized protein OS=Apis mellifera OX=7460 GN=Syx8 PE=4 SV=1
A0A088AS01	43.93	4	1	1	38972	Uncharacterized protein OS=Apis mellifera OX=7460 GN=LOC411901 PE=4 SV=1
A0A088ARU6	43.27	4	1	1	40892	Uncharacterized protein OS=Apis mellifera OX=7460 GN=LOC552554 PE=4 SV=1
A0A088A6F0	42.98	4	1	1	28898	Uncharacterized protein OS=Apis mellifera OX=7460 GN=CCS PE=4 SV=1
A0A088A6N2	42.38	4	1	1	30730	Uncharacterized protein OS=Apis mellifera OX=7460 PE=4 SV=1
Q17053	42.09	4	1	1	42016	Rhodopsin long-wavelength OS=Apis mellifera OX=7460 PE=1 SV=1
Q2YD67	42.09	4	1	1	42045	Long wavelength sensitive opsin 1 OS=Apis mellifera OX=7460 GN=Lop1 PE=3 SV=1
A0A087ZU62	40.94	4	1	1	44225	Uncharacterized protein OS=Apis mellifera OX=7460 GN=LOC411142 PE=3 SV=1
A0A088A8B0	40.61	4	1	1	39511	LIM domain-containing protein OS=Apis mellifera OX=7460 GN=LOC551547 PE=4 SV=1
A0A087ZSD8	40.51	4	1	1	46154	Uncharacterized protein OS=Apis mellifera OX=7460 GN=LOC727081 PE=4 SV=1
A0A088ATR1	40.5	4	1	1	39532	Uncharacterized protein OS=Apis mellifera OX=7460 GN=eIF2B-beta PE=3 SV=1
A0A088A108	39.19	4	1	1	37165	Uncharacterized protein OS=Apis mellifera OX=7460 GN=LOC411863 PE=4 SV=1
A0A088AJH8	39.18	4	1	1	29668	Uncharacterized protein OS=Apis mellifera OX=7460 PE=4 SV=1
A0A088AAI8	39.02	4	1	1	38711	DNA-(apurinic or apyrimidinic site) lyase OS=Apis mellifera OX=7460 GN=Rrp1 PE=3 SV=1
A0A088A727	38.77	4	1	1	54826	Uncharacterized protein OS=Apis mellifera OX=7460 PE=4 SV=1
A0A088AW23	38.51	4	1	1	89070	Uncharacterized protein OS=Apis mellifera OX=7460 PE=4 SV=1
A0A087ZU39	38.06	4	1	1	35736	Uncharacterized protein OS=Apis mellifera OX=7460 GN=LOC725258 PE=3 SV=1
A0A088AP80	37.75	4	1	1	54465	Uncharacterized protein OS=Apis mellifera OX=7460 PE=4 SV=1
A0A087ZRK9	37.48	4	1	1	55335	Catalase OS=Apis mellifera OX=7460 PE=3 SV=1
A0A088ATP7	36.94	4	1	1	32125	Uncharacterized protein OS=Apis mellifera OX=7460 PE=4 SV=1
A0A087ZP86	36.76	4	1	1	36063	Uncharacterized protein OS=Apis mellifera OX=7460 GN=LOC551226 PE=4 SV=1
A0A088ATL6	35.75	4	1	1	36985	Uncharacterized protein OS=Apis mellifera OX=7460 PE=4 SV=1
A0A087ZV45	35.38	4	1	1	58413	Uncharacterized protein OS=Apis mellifera OX=7460 PE=4 SV=1
A0A088AJ42	35.2	4	1	1	43445	Uncharacterized protein OS=Apis mellifera OX=7460 PE=4 SV=1
A0A0B4J2P1	35.08	4	1	1	42546	Phosphatidate cytidylyltransferase mitochondrial OS=Apis mellifera OX=7460 PE=3 SV=1
A0A088A2T3	34.99	4	1	1	44326	Uncharacterized protein OS=Apis mellifera OX=7460 PE=4 SV=1
A0A087ZUW2	34.61	4	1	1	37548	Uncharacterized protein OS=Apis mellifera OX=7460 GN=LOC410062 PE=3 SV=1
A0A087ZY47	34.52	4	1	1	30676	Uncharacterized protein OS=Apis mellifera OX=7460 GN=LOC411732 PE=4 SV=1
A0A088AT14	34.12	4	1	1	69753	Eyes absent homolog OS=Apis mellifera OX=7460 PE=3 SV=1
A0A088A2E6	34	4	1	1	33681	Uncharacterized protein OS=Apis mellifera OX=7460 GN=mRpL15 PE=3 SV=1
A0A088ABW5	33.71	4	1	1	24454	Uncharacterized protein OS=Apis mellifera OX=7460 GN=LOC410883 PE=3 SV=1
A0A087ZPP1	33.32	4	1	1	23046	Uncharacterized protein OS=Apis mellifera OX=7460 GN=LOC410034 PE=3 SV=1
A0A088AQA9	33.22	4	1	1	38890	Uncharacterized protein OS=Apis mellifera OX=7460 GN=LOC551827 PE=4 SV=1
A0A088AIR4	33.02	4	1	1	39424	Uncharacterized protein OS=Apis mellifera OX=7460 GN=LOC409169 PE=4 SV=1
A0A088AR33	32.97	4	1	1	20047	Uncharacterized protein OS=Apis mellifera OX=7460 GN=Aprt PE=3 SV=1
A0A088A5N3	32.73	4	1	1	55178	Uncharacterized protein OS=Apis mellifera OX=7460 GN=LOC551838 PE=4 SV=1
A0A088AHW7	32	4	1	1	38016	Uncharacterized protein OS=Apis mellifera OX=7460 GN=LOC410195 PE=4 SV=1
A0A087ZQ42	31.59	4	1	1	42404	Uncharacterized protein OS=Apis mellifera OX=7460 GN=TfIIA-L PE=4 SV=1
A0A088AHU5	31.18	4	1	1	33756	Uncharacterized protein OS=Apis mellifera OX=7460 GN=LOC551588 PE=4 SV=1
A0A087ZYS0	30.91	4	1	1	29037	Dolichol-phosphate mannosyltransferase subunit 1 OS=Apis mellifera OX=7460 GN=LOC409115 PE=3 SV=1
A0A088A6W0	30.78	4	1	1	22036	Uncharacterized protein OS=Apis mellifera OX=7460 PE=4 SV=1
A0A088AJA2	30.34	4	1	1	37560	Uncharacterized protein OS=Apis mellifera OX=7460 PE=4 SV=1
A0A087ZSD2	29.76	4	1	1	46423	Uncharacterized protein OS=Apis mellifera OX=7460 GN=LOC410556 PE=4 SV=1
A0A088A1C2	29.04	4	1	1	48356	Uncharacterized protein OS=Apis mellifera OX=7460 GN=LOC410340 PE=4 SV=1
A0A088AQF4	28.17	4	1	1	48245	Uncharacterized protein OS=Apis mellifera OX=7460 PE=4 SV=1
A0A087ZUY3	28.1	4	1	1	32723	Uncharacterized protein OS=Apis mellifera OX=7460 GN=102656893 PE=3 SV=1
A0A088AP41	27.89	4	1	1	34264	Uncharacterized protein OS=Apis mellifera OX=7460 GN=LOC412885 PE=4 SV=1
A0A088AJB6	27.4	4	1	1	37911	Uncharacterized protein OS=Apis mellifera OX=7460 GN=LOC551452 PE=4 SV=1
A0A088A090	27.17	4	1	1	32038	Uncharacterized protein OS=Apis mellifera OX=7460 GN=LOC727420 PE=4 SV=1
A0A088AD85	27.13	4	1	1	32432	Uncharacterized protein OS=Apis mellifera OX=7460 GN=LOC551591 PE=4 SV=1
A0A088AQX4	26.69	4	1	1	29450	Uncharacterized protein OS=Apis mellifera OX=7460 PE=4 SV=1
A0A088AFG2	26.66	4	1	1	53724	Uncharacterized protein OS=Apis mellifera OX=7460 PE=4 SV=1
A0A087ZTK4	26.32	4	1	1	74156	Uncharacterized protein OS=Apis mellifera OX=7460 GN=Nedd9 PE=4 SV=1
Q5XUU6	26.19	4	1	1	29213	Take-out-like carrier protein JHBP-1 OS=Apis mellifera OX=7460 PE=2 SV=1
A0A088AUU0	26.05	4	1	1	66680	Uncharacterized protein OS=Apis mellifera OX=7460 GN=LOC413787 PE=4 SV=1
A0A087ZP31	203.35	5	13	13	500017	Uncharacterized protein OS=Apis mellifera OX=7460 PE=4 SV=1
A0A087ZMR4	184.95	5	18	18	623498	Uncharacterized protein OS=Apis mellifera OX=7460 PE=4 SV=1
A0A088AUI4	176.42	5	5	5	147424	Uncharacterized protein OS=Apis mellifera OX=7460 GN=LOC551167 PE=4 SV=1
Q68J72	136.65	5	6	6	213141	Dscam OS=Apis mellifera OX=7460 PE=4 SV=1
A0A088AFQ2	128.05	5	2	2	81103	Uncharacterized protein OS=Apis mellifera OX=7460 GN=LOC408836 PE=4 SV=1
A0A088A1V8	121.59	5	4	4	161261	Uncharacterized protein OS=Apis mellifera OX=7460 GN=Sara PE=4 SV=1
A0A087ZV93	119.21	5	4	4	135144	Uncharacterized protein OS=Apis mellifera OX=7460 GN=LOC411923 PE=3 SV=1
A0A088A0G6	116.18	5	4	4	92764	Uncharacterized protein OS=Apis mellifera OX=7460 GN=flfl PE=4 SV=1
A0A088AAT6	116.02	5	4	4	132733	Uncharacterized protein OS=Apis mellifera OX=7460 PE=4 SV=1
A0A088AFE6	114.57	5	5	5	154520	Uncharacterized protein OS=Apis mellifera OX=7460 GN=413959 PE=4 SV=1
W8VTH9	113.71	5	2	2	67898	Tyramine beta-hydroxylase OS=Apis mellifera OX=7460 GN=AmTbH PE=2 SV=1
Q147S1	113.71	5	2	2	70097	Tyramine beta hydroxylase OS=Apis mellifera OX=7460 GN=TBh PE=2 SV=1
A0A088AEX7	113.21	5	3	3	92809	Signal transducer and activator of transcription OS=Apis mellifera OX=7460 GN=STAT92E-like PE=3 SV=1
A0A087ZZI8	110.06	5	2	2	88836	Uncharacterized protein OS=Apis mellifera OX=7460 GN=RabGAP9 PE=4 SV=1
A0A088A069	109.42	5	4	4	135069	Uncharacterized protein OS=Apis mellifera OX=7460 PE=4 SV=1
A0A088AFV7	103.74	5	4	4	160710	Uncharacterized protein OS=Apis mellifera OX=7460 GN=LOC408624 PE=4 SV=1
A0A088AIB9	103.4	5	2	2	84345	Glutamine-dependent NAD(+) synthetase OS=Apis mellifera OX=7460 GN=LOC409487 PE=3 SV=1
A0A088AE08	103.11	5	3	3	116220	Uncharacterized protein OS=Apis mellifera OX=7460 PE=4 SV=1
A0A088AD04	100.33	5	3	3	117283	Uncharacterized protein OS=Apis mellifera OX=7460 GN=Iswi PE=4 SV=1
A0A088AM62	98.82	5	3	3	111284	Uncharacterized protein OS=Apis mellifera OX=7460 GN=LOC726483 PE=3 SV=1
A0A088AE63	98.65	5	2	2	76101	Uncharacterized protein OS=Apis mellifera OX=7460 PE=4 SV=1
A0A088AGM4	98.63	5	6	6	164421	DNA topoisomerase 2 OS=Apis mellifera OX=7460 PE=3 SV=1
A0A088AB77	97.93	5	3	3	95492	Uncharacterized protein OS=Apis mellifera OX=7460 GN=Calx PE=3 SV=1
Q6TLC7	96.76	5	3	2	72811	Transporter OS=Apis mellifera OX=7460 GN=GAT-1B PE=2 SV=1
A0A087ZUY0	96.11	5	3	3	87358	Uncharacterized protein OS=Apis mellifera OX=7460 PE=4 SV=1
A0A088AH77	93.41	5	3	3	110269	Uncharacterized protein OS=Apis mellifera OX=7460 GN=Syt12 PE=4 SV=1
A0A087ZPE3	91.6	5	2	2	63150	Uncharacterized protein OS=Apis mellifera OX=7460 GN=102653922 PE=4 SV=1
A0A088ADX2	90.78	5	2	2	89395	Uncharacterized protein OS=Apis mellifera OX=7460 GN=LOC552527 PE=4 SV=1
A0A087ZV77	90.61	5	4	4	178412	Uncharacterized protein OS=Apis mellifera OX=7460 PE=4 SV=1
A0A088AHC6	90.57	5	1	1	47486	Uncharacterized protein OS=Apis mellifera OX=7460 PE=4 SV=1
A0A088A5B8	89.9	5	2	2	74091	Uncharacterized protein OS=Apis mellifera OX=7460 PE=4 SV=1
A0A088A2H9	88.77	5	1	1	35911	Uncharacterized protein OS=Apis mellifera OX=7460 PE=4 SV=1
A0A0S2LSD8	87.82	5	2	2	45235	Cytochrome b OS=Apis mellifera OX=7460 GN=CYTB PE=3 SV=1
A0A347ZMU3	87.82	5	2	2	45268	Cytochrome b OS=Apis mellifera OX=7460 GN=Cytb PE=3 SV=1
A0A347ZMV6	87.82	5	2	2	45256	Cytochrome b OS=Apis mellifera OX=7460 GN=Cytb PE=3 SV=1
A0A291LR98	87.82	5	2	2	45237	Cytochrome b OS=Apis mellifera OX=7460 GN=CYTB PE=3 SV=1
A0A088ATW7	86.03	5	3	3	97499	Uncharacterized protein OS=Apis mellifera OX=7460 GN=LOC551486 PE=4 SV=1
A0A088A0Y0	85.63	5	2	2	72567	Uncharacterized protein OS=Apis mellifera OX=7460 GN=LOC726432 PE=4 SV=1
A0A2P1DTS4	83.25	5	1	1	58027	Cytochrome c oxidase subunit 1 (Fragment) OS=Apis mellifera OX=7460 GN=COI PE=3 SV=1
A0A0S2LT70	83.25	5	1	1	59243	Cytochrome c oxidase subunit 1 OS=Apis mellifera OX=7460 GN=COX1 PE=3 SV=1
A0A347ZMT3	83.25	5	1	1	59294	Cytochrome c oxidase subunit 1 OS=Apis mellifera OX=7460 GN=COX1 PE=3 SV=1
A0A087ZVJ2	82.53	5	3	3	106579	Uncharacterized protein OS=Apis mellifera OX=7460 PE=4 SV=1
A0A087ZRN0	78.81	5	4	4	149895	Cytoplasmic FMR1-interacting protein OS=Apis mellifera OX=7460 GN=Sra-1 PE=3 SV=1
A0A087ZTL6	77.04	5	5	5	220328	Uncharacterized protein OS=Apis mellifera OX=7460 PE=4 SV=1
A0A088ADW0	75.72	5	1	1	37922	Uncharacterized protein OS=Apis mellifera OX=7460 GN=LOC552608 PE=4 SV=1
A0A088AN00	73.51	5	2	2	89336	Uncharacterized protein OS=Apis mellifera OX=7460 PE=4 SV=1
A0A087ZZD4	73.23	5	2	1	56137	Uncharacterized protein OS=Apis mellifera OX=7460 GN=LOC552617 PE=3 SV=1
A0A088AQV7	70.73	5	1	1	36814	Uncharacterized protein OS=Apis mellifera OX=7460 GN=LOC411795 PE=4 SV=1
A0A087ZXK7	69.42	5	2	1	64564	Uncharacterized protein OS=Apis mellifera OX=7460 GN=DDX17 PE=3 SV=1
A0A087ZYS2	68.71	5	2	2	95907	Vacuolar protein sorting-associated protein 16 homolog OS=Apis mellifera OX=7460 GN=Vps16A PE=3 SV=1
Q86MV4	67.4	5	3	3	80094	Prophenoloxidase OS=Apis mellifera OX=7460 GN=PPO PE=2 SV=2
A0A087ZSL8	65.77	5	1	1	32231	Uncharacterized protein OS=Apis mellifera OX=7460 PE=4 SV=1
A0A087ZPX3	64.93	5	3	3	63419	Uncharacterized protein OS=Apis mellifera OX=7460 PE=4 SV=1
A0A087ZV79	63.98	5	2	2	76996	Uncharacterized protein OS=Apis mellifera OX=7460 GN=LOC552433 PE=4 SV=1
A0A088ADS8	63.8	5	1	1	38694	Uncharacterized protein OS=Apis mellifera OX=7460 PE=3 SV=1
A0A088AKR6	62.32	5	2	2	80688	Uncharacterized protein OS=Apis mellifera OX=7460 GN=LOC409425 PE=4 SV=1
A0A088AUG1	61.94	5	1	1	26229	Tetraspanin OS=Apis mellifera OX=7460 GN=Tspan13 PE=3 SV=1
A0A088AKI4	61.5	5	1	1	53846	Uncharacterized protein OS=Apis mellifera OX=7460 GN=LOC412116 PE=4 SV=1
A0A087ZU10	59.7	5	2	2	71839	Uncharacterized protein OS=Apis mellifera OX=7460 PE=4 SV=1
A0A088AQG0	59.5	5	1	1	40603	Uncharacterized protein OS=Apis mellifera OX=7460 GN=LOC727141 PE=4 SV=1
A0A088A802	57.79	5	1	1	32878	Uncharacterized protein OS=Apis mellifera OX=7460 PE=3 SV=1
A0A088AEY7	56.16	5	1	1	44140	Uncharacterized protein OS=Apis mellifera OX=7460 GN=Smyd5 PE=4 SV=1
A0A087ZUZ8	55.16	5	2	2	61631	Uncharacterized protein OS=Apis mellifera OX=7460 PE=3 SV=1
A0A087ZZR0	55	5	1	1	65768	Replication protein A subunit OS=Apis mellifera OX=7460 PE=3 SV=1
A0A088ANZ1	54.43	5	1	1	32688	Uncharacterized protein OS=Apis mellifera OX=7460 GN=LOC552499 PE=4 SV=1
A0A088AGJ2	53.27	5	2	2	55693	Uncharacterized protein OS=Apis mellifera OX=7460 GN=LOC411694 PE=4 SV=1
A0A088AQM9	53.25	5	1	1	37527	Uncharacterized protein OS=Apis mellifera OX=7460 GN=LOC413551 PE=3 SV=1
A0A088ABZ2	53.13	5	1	1	25454	Uncharacterized protein OS=Apis mellifera OX=7460 GN=LOC552153 PE=4 SV=1
A0A088ANP8	52.46	5	1	1	39113	Uncharacterized protein OS=Apis mellifera OX=7460 GN=LOC551842 PE=4 SV=1
A0A088AE96	52.35	5	2	2	73463	Uncharacterized protein OS=Apis mellifera OX=7460 PE=4 SV=1
A0A087ZT65	51.07	5	1	1	31771	Uncharacterized protein OS=Apis mellifera OX=7460 PE=4 SV=1
A0A088AAK5	50.34	5	1	1	32409	Peptidyl-prolyl cis-trans isomerase E OS=Apis mellifera OX=7460 PE=3 SV=1
A0A088AH82	49.01	5	1	1	42058	Uncharacterized protein OS=Apis mellifera OX=7460 GN=Snr1 PE=3 SV=1
A0A088A2B8	48.98	5	1	1	40043	Uncharacterized protein OS=Apis mellifera OX=7460 PE=4 SV=1
A0A088ASH3	48.88	5	1	1	27030	Uncharacterized protein OS=Apis mellifera OX=7460 GN=LOC725260 PE=4 SV=1
A0A088AVJ7	47.7	5	1	1	31460	Uncharacterized protein OS=Apis mellifera OX=7460 PE=4 SV=1
A0A088APY7	47.18	5	1	1	27002	Uncharacterized protein OS=Apis mellifera OX=7460 GN=LOC410027 PE=4 SV=1
A0A087ZW82	46.34	5	1	1	28525	Uncharacterized protein OS=Apis mellifera OX=7460 GN=102655411 PE=4 SV=1
A0A088A0H7	46.24	5	2	2	71145	Uncharacterized protein OS=Apis mellifera OX=7460 PE=4 SV=1
A0A088A3A8	45.32	5	2	2	48944	Uncharacterized protein OS=Apis mellifera OX=7460 GN=LOC414028 PE=4 SV=1
A0A088AHD0	45.23	5	1	1	19082	Uncharacterized protein OS=Apis mellifera OX=7460 GN=102656594 PE=4 SV=1
A0A087ZVS9	45.1	5	1	1	27215	Uncharacterized protein OS=Apis mellifera OX=7460 GN=GstT1 PE=3 SV=1
A0A087ZUX7	45.07	5	1	1	34598	Uncharacterized protein OS=Apis mellifera OX=7460 PE=4 SV=1
A0A088ATA9	44.44	5	1	1	28123	Uncharacterized protein OS=Apis mellifera OX=7460 PE=4 SV=1
A0A088AET5	44.09	5	1	1	41103	Uncharacterized protein OS=Apis mellifera OX=7460 GN=mRpL1 PE=4 SV=1
A0A088AKS4	42.6	5	1	1	30620	Uncharacterized protein OS=Apis mellifera OX=7460 PE=4 SV=1
A0A088A241	40.5	5	1	1	32431	Uncharacterized protein OS=Apis mellifera OX=7460 GN=LOC409494 PE=3 SV=1
A0A087ZQM1	39.49	5	1	1	23263	Uncharacterized protein OS=Apis mellifera OX=7460 PE=4 SV=1
A0A087ZQS0	39.49	5	1	1	31536	Uncharacterized protein OS=Apis mellifera OX=7460 PE=4 SV=1
A0A087ZN42	38.71	5	1	1	27809	Peptidyl-prolyl cis-trans isomerase OS=Apis mellifera OX=7460 GN=LOC408428 PE=3 SV=1
A0A088AQL5	37.62	5	1	1	36638	Uncharacterized protein OS=Apis mellifera OX=7460 GN=Bub3 PE=4 SV=1
A0A087ZZ23	37.36	5	1	1	32706	Uncharacterized protein OS=Apis mellifera OX=7460 GN=mRpL4 PE=4 SV=1
A0A088AVN6	37.32	5	1	1	22776	Vesicle transport protein OS=Apis mellifera OX=7460 GN=LOC411493 PE=3 SV=1
A0A087ZZV4	37.14	5	1	1	39668	Uncharacterized protein OS=Apis mellifera OX=7460 GN=LOC724133 PE=4 SV=1
A0A088AKC1	34.17	5	1	1	18405	Uncharacterized protein OS=Apis mellifera OX=7460 PE=4 SV=1
A0A087ZT32	34.13	5	1	1	38925	Uncharacterized protein OS=Apis mellifera OX=7460 GN=LOC550698 PE=3 SV=1
A0A088AFE5	33.44	5	1	1	38665	Uncharacterized protein OS=Apis mellifera OX=7460 GN=NiPp1 PE=4 SV=1
A0A088ASX9	33.18	5	1	1	57736	Uncharacterized protein OS=Apis mellifera OX=7460 GN=552582 PE=4 SV=1
A0A0B4J2N3	32.51	5	1	1	16275	Uncharacterized protein OS=Apis mellifera OX=7460 GN=mbf1 PE=4 SV=1
A0A087ZVJ8	32.37	5	1	1	35637	Uncharacterized protein OS=Apis mellifera OX=7460 GN=LOC409005 PE=4 SV=1
A0A088AT34	32.36	5	1	1	35519	Uncharacterized protein OS=Apis mellifera OX=7460 GN=LOC550789 PE=4 SV=1
A0A088A292	31.93	5	1	1	75896	Transmembrane 9 superfamily member OS=Apis mellifera OX=7460 GN=LOC552455 PE=3 SV=1
A0A088AHX2	31.71	5	1	1	38683	Uncharacterized protein OS=Apis mellifera OX=7460 PE=4 SV=1
A0A088AK82	31.59	5	1	1	46521	Uncharacterized protein OS=Apis mellifera OX=7460 PE=4 SV=1
A0A087ZSE6	30.88	5	1	1	49676	Aminomethyltransferase OS=Apis mellifera OX=7460 GN=LOC410550 PE=3 SV=1
A0A088ABP9	30.33	5	1	1	25054	Uncharacterized protein OS=Apis mellifera OX=7460 GN=mats PE=4 SV=1
A0A087ZPQ1	30.13	5	1	1	24878	CDP-diacylglycerol--inositol 3-phosphatidyltransferase OS=Apis mellifera OX=7460 GN=LOC411408 PE=3 SV=1
A0A088A895	30.09	5	1	1	37100	Uncharacterized protein OS=Apis mellifera OX=7460 PE=4 SV=1
A0A088AT27	29.48	5	1	1	37494	Uncharacterized protein OS=Apis mellifera OX=7460 PE=4 SV=1
A0A087ZXS7	29.41	5	1	1	25725	Uncharacterized protein OS=Apis mellifera OX=7460 GN=LOC726605 PE=4 SV=1
A0A088A7Z2	29.4	5	1	1	28320	Uncharacterized protein OS=Apis mellifera OX=7460 GN=LOC551978 PE=4 SV=1
A0A088AF65	28.96	5	1	1	24630	Uncharacterized protein OS=Apis mellifera OX=7460 GN=102653784 PE=4 SV=1
A0A087ZY30	28.59	5	1	1	22985	Uncharacterized protein OS=Apis mellifera OX=7460 PE=4 SV=1
A0A088A4K1	28.05	5	1	1	22250	Uncharacterized protein OS=Apis mellifera OX=7460 GN=LOC552730 PE=4 SV=1
A0A088A1C7	27.91	5	1	1	41703	Uncharacterized protein OS=Apis mellifera OX=7460 PE=4 SV=1
A0A088AA79	27.76	5	1	1	21583	Uncharacterized protein OS=Apis mellifera OX=7460 PE=4 SV=1
A0A088AGE9	27.72	5	1	1	34497	Uncharacterized protein OS=Apis mellifera OX=7460 GN=mRpL2 PE=4 SV=1
A0A087ZY44	27.49	5	1	1	17366	Uncharacterized protein OS=Apis mellifera OX=7460 GN=724708 PE=4 SV=1
A0A088AMG1	27.28	5	1	1	27662	Uncharacterized protein OS=Apis mellifera OX=7460 GN=107965473 PE=4 SV=1
A0A088ATH3	26.78	5	1	1	33617	Uncharacterized protein OS=Apis mellifera OX=7460 GN=LOC725460 PE=4 SV=1
A0A088A1E2	26.76	5	1	1	41770	Uncharacterized protein OS=Apis mellifera OX=7460 GN=LOC410326 PE=4 SV=1
A0A087ZW27	26.48	5	1	1	28916	Uncharacterized protein OS=Apis mellifera OX=7460 PE=3 SV=1
A0A088ALM0	190.97	6	9	9	215660	Uncharacterized protein OS=Apis mellifera OX=7460 PE=3 SV=1
A0A088AAV2	179.38	6	3	3	105866	Uncharacterized protein OS=Apis mellifera OX=7460 PE=4 SV=1
A0A087ZN37	156.74	6	6	6	177848	Uncharacterized protein OS=Apis mellifera OX=7460 GN=408429 PE=4 SV=1
A0A088AHZ7	154.3	6	5	5	149589	Uncharacterized protein OS=Apis mellifera OX=7460 PE=4 SV=1
A0A0B4J2L8	148.42	6	8	8	278873	Serine/threonine-protein kinase TOR OS=Apis mellifera OX=7460 GN=Tor PE=3 SV=1
A0A088AQ15	147.12	6	5	5	138675	Uncharacterized protein OS=Apis mellifera OX=7460 GN=LOC412111 PE=4 SV=1
A0A088AVA3	144.83	6	5	5	136406	Phospholipid-transporting ATPase OS=Apis mellifera OX=7460 GN=LOC552074 PE=3 SV=1
A0A088ANU5	144.81	6	3	3	58382	Uncharacterized protein OS=Apis mellifera OX=7460 GN=LOC550691 PE=4 SV=1
A0A088AUR2	143.61	6	3	3	74788	Uncharacterized protein OS=Apis mellifera OX=7460 GN=LOC409086 PE=4 SV=1
A0A088A5U8	140.86	6	3	3	86529	Uncharacterized protein OS=Apis mellifera OX=7460 PE=4 SV=1
A0A088A1K2	140.66	6	8	8	199258	Uncharacterized protein OS=Apis mellifera OX=7460 PE=3 SV=1
A0A088AFY8	138.79	6	2	2	64430	Uncharacterized protein OS=Apis mellifera OX=7460 GN=LOC408811 PE=4 SV=1
A0A087ZQX5	137.14	6	6	6	147039	Uncharacterized protein OS=Apis mellifera OX=7460 PE=4 SV=1
A0A087ZWJ6	133.93	6	6	6	198923	Uncharacterized protein OS=Apis mellifera OX=7460 GN=Nup98 PE=4 SV=1
A0A087ZPW6	130.03	6	4	4	86613	Uncharacterized protein OS=Apis mellifera OX=7460 PE=4 SV=1
A0A088AIQ6	129.36	6	5	5	140128	Uncharacterized protein OS=Apis mellifera OX=7460 PE=4 SV=1
A0A088A5A4	128.89	6	3	3	115135	Uncharacterized protein OS=Apis mellifera OX=7460 GN=Chro PE=4 SV=1
A0A087ZRP6	119.11	6	3	3	69710	Uncharacterized protein OS=Apis mellifera OX=7460 PE=4 SV=1
A0A087ZZH2	117.37	6	4	4	137057	Uncharacterized protein OS=Apis mellifera OX=7460 GN=Tf PE=4 SV=1
A0A088AMR8	115.22	6	3	3	67426	Uncharacterized protein OS=Apis mellifera OX=7460 GN=LOC412540 PE=4 SV=1
A0A088AB56	115.02	6	3	3	83641	Uncharacterized protein OS=Apis mellifera OX=7460 PE=4 SV=1
A0A088A153	112.95	6	3	3	74594	Uncharacterized protein OS=Apis mellifera OX=7460 GN=LOC409152 PE=4 SV=1
A0A088AHD6	112.18	6	3	3	92476	Uncharacterized protein OS=Apis mellifera OX=7460 PE=4 SV=1
A0A087ZTR9	111.85	6	4	4	84533	Elongation factor G mitochondrial OS=Apis mellifera OX=7460 GN=LOC411351 PE=3 SV=1
A0A088A049	110.34	6	4	4	111956	Uncharacterized protein OS=Apis mellifera OX=7460 PE=4 SV=1
A0A088A8Z7	109.49	6	5	5	135389	Uncharacterized protein OS=Apis mellifera OX=7460 GN=g PE=4 SV=1
A0A087ZTR6	109.46	6	5	5	142795	Anion exchange protein OS=Apis mellifera OX=7460 GN=LOC409792 PE=3 SV=1
A0A088AKJ5	109.13	6	5	5	178112	Uncharacterized protein OS=Apis mellifera OX=7460 PE=4 SV=1
A0A088AAM9	108.85	6	3	3	80234	Uncharacterized protein OS=Apis mellifera OX=7460 GN=Appl PE=4 SV=1
A0A088A196	108.28	6	2	2	42785	Uncharacterized protein OS=Apis mellifera OX=7460 GN=LOC552303 PE=4 SV=1
A0A088AM88	107	6	3	3	73169	Uncharacterized protein OS=Apis mellifera OX=7460 PE=3 SV=1
A0A088A332	106.49	6	3	3	44589	Alpha-galactosidase OS=Apis mellifera OX=7460 PE=3 SV=1
A0A088ADI5	101.56	6	4	4	150406	Uncharacterized protein OS=Apis mellifera OX=7460 PE=4 SV=1
A0A088AG06	98.76	6	3	3	86256	Uncharacterized protein OS=Apis mellifera OX=7460 GN=SF3A1 PE=4 SV=1
A0A088A114	98.52	6	3	3	96101	Uncharacterized protein OS=Apis mellifera OX=7460 PE=3 SV=1
A0A088AUK1	98	6	1	1	40524	Uncharacterized protein OS=Apis mellifera OX=7460 PE=4 SV=1
A0A088AI46	95.23	6	2	2	79559	Transporter OS=Apis mellifera OX=7460 GN=NT-7 PE=3 SV=1
A0A088AH95	94.44	6	3	3	64377	Uncharacterized protein OS=Apis mellifera OX=7460 GN=LOC409467 PE=3 SV=1
A0A088APQ7	93.7	6	4	4	107499	Uncharacterized protein OS=Apis mellifera OX=7460 GN=swm PE=4 SV=1
A0A088ARM0	90.31	6	1	1	34740	Uncharacterized protein OS=Apis mellifera OX=7460 PE=4 SV=1
A0A087ZXT9	89.3	6	3	3	104260	Uncharacterized protein OS=Apis mellifera OX=7460 GN=smid PE=4 SV=1
A0A087ZX58	87.11	6	2	2	56432	Uncharacterized protein OS=Apis mellifera OX=7460 GN=LOC551273 PE=4 SV=1
A0A087ZW78	86.85	6	4	4	104387	Uncharacterized protein OS=Apis mellifera OX=7460 GN=LOC413091 PE=4 SV=1
A0A088AQQ2	85.29	6	5	5	123900	Uncharacterized protein OS=Apis mellifera OX=7460 PE=4 SV=1
A0A088A788	84.27	6	3	3	84971	Integrin beta OS=Apis mellifera OX=7460 PE=3 SV=1
A0A087ZZW7	84.15	6	1	1	35010	Uncharacterized protein OS=Apis mellifera OX=7460 GN=LOC724743 PE=4 SV=1
A0A087ZUI8	83.09	6	4	4	152825	Uncharacterized protein OS=Apis mellifera OX=7460 PE=4 SV=1
A0A088ATY4	82.91	6	2	2	64646	Uncharacterized protein OS=Apis mellifera OX=7460 PE=4 SV=1
A0A088AIB2	82.45	6	4	4	119181	Uncharacterized protein OS=Apis mellifera OX=7460 GN=eIF5B PE=4 SV=1
A0A087ZVQ1	82.08	6	3	3	104450	Uncharacterized protein OS=Apis mellifera OX=7460 GN=Tao-1 PE=4 SV=1
A0A088AHN3	82.01	6	4	4	80844	Uncharacterized protein OS=Apis mellifera OX=7460 PE=4 SV=1
A0A088AW53	81.44	6	2	2	52384	Uncharacterized protein OS=Apis mellifera OX=7460 GN=727261 PE=4 SV=1
A0A087ZWM1	79.66	6	2	2	55001	Uncharacterized protein OS=Apis mellifera OX=7460 PE=4 SV=1
A0A088ACE9	78.96	6	1	1	31111	Uncharacterized protein OS=Apis mellifera OX=7460 GN=LOC410076 PE=4 SV=1
A0A088A7K4	78.51	6	1	1	33526	Uncharacterized protein OS=Apis mellifera OX=7460 GN=LOC551421 PE=4 SV=1
A0A087ZZN7	78.22	6	1	1	28763	Uncharacterized protein OS=Apis mellifera OX=7460 GN=LOC412443 PE=4 SV=1
A0A087ZZT7	76.68	6	2	2	49769	Uncharacterized protein OS=Apis mellifera OX=7460 GN=mRpS5 PE=4 SV=1
A0A088AFH9	75.55	6	2	2	79672	Uncharacterized protein OS=Apis mellifera OX=7460 GN=nompA PE=4 SV=1
A0A088A0Y8	71.89	6	2	2	53916	Uncharacterized protein OS=Apis mellifera OX=7460 PE=4 SV=1
A0A088ACY2	71.78	6	3	3	90249	AP-1 complex subunit gamma OS=Apis mellifera OX=7460 PE=3 SV=1
A0A088AB14	69.54	6	2	2	60687	Uncharacterized protein OS=Apis mellifera OX=7460 GN=LOC409617 PE=4 SV=1
A0A088AFM8	69.25	6	2	2	51351	Uncharacterized protein OS=Apis mellifera OX=7460 PE=4 SV=1
A0A088AFN8	69.07	6	1	1	55051	Signal recognition particle 54 kDa protein OS=Apis mellifera OX=7460 GN=LOC552114 PE=3 SV=1
A0A088A6E0	67.42	6	5	5	102375	Uncharacterized protein OS=Apis mellifera OX=7460 PE=3 SV=1
Q7YXK7	67.42	6	5	5	106270	NMDA-type glutamate receptor 1 OS=Apis mellifera OX=7460 GN=Nmdar1 PE=2 SV=1
A0A088A8N3	67.07	6	1	1	32430	Uncharacterized protein OS=Apis mellifera OX=7460 GN=724679 PE=4 SV=1
A0EIZ8	66.44	6	2	2	59810	Nicotinic acetylcholine receptor beta1 subunit OS=Apis mellifera OX=7460 GN=nAChRb1 PE=2 SV=1
A0A088ABL8	66.38	6	2	2	53598	Uncharacterized protein OS=Apis mellifera OX=7460 PE=4 SV=1
A0A088AUK5	66.05	6	1	1	72121	Uncharacterized protein OS=Apis mellifera OX=7460 PE=4 SV=1
A0A087ZTY5	65.8	6	2	2	72375	Uncharacterized protein OS=Apis mellifera OX=7460 GN=Prpf3 PE=4 SV=1
A0A088ACD8	65.52	6	1	1	25987	Uncharacterized protein OS=Apis mellifera OX=7460 GN=LOC410969 PE=4 SV=1
A0A087ZU14	62.91	6	3	3	111499	Aminopeptidase OS=Apis mellifera OX=7460 GN=LOC412263 PE=3 SV=1
A0A087ZUG3	60.78	6	1	1	56170	Uncharacterized protein OS=Apis mellifera OX=7460 PE=4 SV=1
A0A087ZQ62	60.29	6	2	2	83556	Cleavage and polyadenylation specificity factor subunit 2 OS=Apis mellifera OX=7460 GN=Cpsf100 PE=3 SV=1
A0A088A4N8	60.28	6	1	1	29686	Uncharacterized protein OS=Apis mellifera OX=7460 PE=4 SV=1
A0A088A5B9	59.76	6	1	1	46613	Uncharacterized protein OS=Apis mellifera OX=7460 GN=LOC409571 PE=4 SV=1
A0A088ADR8	59.7	6	1	1	57387	Uncharacterized protein OS=Apis mellifera OX=7460 GN=LOC409560 PE=4 SV=1
A0A088A6M4	59.64	6	1	1	29202	Derlin OS=Apis mellifera OX=7460 GN=727262 PE=3 SV=1
A0A087ZPM0	59.25	6	2	2	58459	Uncharacterized protein OS=Apis mellifera OX=7460 PE=4 SV=1
A0A088AFI7	57.45	6	1	1	16295	Uncharacterized protein OS=Apis mellifera OX=7460 GN=CPF2 PE=4 SV=1
A0A087ZQA2	57.15	6	2	2	47048	Dipeptidase OS=Apis mellifera OX=7460 PE=3 SV=1
A0A087ZUA7	57.03	6	2	2	63304	Uncharacterized protein OS=Apis mellifera OX=7460 GN=LOC412804 PE=4 SV=1
A0A088A4P1	56.53	6	1	1	61804	Uncharacterized protein OS=Apis mellifera OX=7460 GN=Bx42 PE=4 SV=1
A0A088AFV8	56.34	6	1	1	28014	Uncharacterized protein OS=Apis mellifera OX=7460 PE=4 SV=1
U3KR34	56.29	6	1	1	20663	Uncharacterized protein OS=Apis mellifera OX=7460 GN=LOC552295 PE=4 SV=1
A0A087ZS22	56.13	6	2	2	60787	Uncharacterized protein OS=Apis mellifera OX=7460 GN=LOC408478 PE=3 SV=1
A0A087ZYZ6	55.34	6	2	2	50749	Uncharacterized protein OS=Apis mellifera OX=7460 GN=LOC410999 PE=4 SV=1
A0A088AIL9	55.16	6	1	1	33570	Uncharacterized protein OS=Apis mellifera OX=7460 PE=4 SV=1
A0A088AM42	55.09	6	1	1	26821	Uncharacterized protein OS=Apis mellifera OX=7460 PE=4 SV=1
A0A088A2H3	55.06	6	1	1	21890	Uncharacterized protein OS=Apis mellifera OX=7460 GN=LOC552159 PE=4 SV=1
A0A088AP66	55	6	1	1	23199	Uncharacterized protein OS=Apis mellifera OX=7460 GN=100187709 PE=4 SV=1
A0A088A7K3	54.77	6	1	1	35443	Uncharacterized protein OS=Apis mellifera OX=7460 GN=LOC727078 PE=4 SV=1
A0A088A267	52.11	6	1	1	32294	Uncharacterized protein OS=Apis mellifera OX=7460 GN=LOC551098 PE=4 SV=1
A0A087ZSC5	51.95	6	1	1	22422	Uncharacterized protein OS=Apis mellifera OX=7460 GN=mRpS34 PE=4 SV=1
A0A088ABJ1	51.11	6	2	2	84448	Uncharacterized protein OS=Apis mellifera OX=7460 PE=4 SV=1
A0A087ZNT4	50.21	6	1	1	28697	Uncharacterized protein OS=Apis mellifera OX=7460 GN=100577582 PE=4 SV=1
A0A087ZWW5	48.9	6	1	1	31344	1-acyl-sn-glycerol-3-phosphate acyltransferase OS=Apis mellifera OX=7460 PE=3 SV=1
A0A088AK95	48.84	6	1	1	25121	Uncharacterized protein OS=Apis mellifera OX=7460 GN=LOC552190 PE=4 SV=1
A0A087ZXS4	44.57	6	1	1	25284	Uncharacterized protein OS=Apis mellifera OX=7460 GN=CTL11 PE=4 SV=1
A0A087ZPR7	41.45	6	1	1	29684	Uncharacterized protein OS=Apis mellifera OX=7460 GN=usnp PE=4 SV=1
A0A088APU1	41.16	6	2	2	57247	Uncharacterized protein OS=Apis mellifera OX=7460 GN=LOC551041 PE=3 SV=1
A0A088ATB5	39.65	6	1	1	36278	Uncharacterized protein OS=Apis mellifera OX=7460 GN=LOC409189 PE=3 SV=1
A0A088A5R4	39.16	6	1	1	35882	Uncharacterized protein OS=Apis mellifera OX=7460 GN=LOC413311 PE=4 SV=1
A0A088APT9	38.57	6	1	1	36764	tRNA pseudouridine synthase OS=Apis mellifera OX=7460 GN=LOC725326 PE=3 SV=1
A0A087ZZD9	38.41	6	1	1	27293	Uncharacterized protein OS=Apis mellifera OX=7460 GN=LOC409272 PE=4 SV=1
A0A087ZTN9	38.16	6	1	1	22502	Uncharacterized protein OS=Apis mellifera OX=7460 GN=LOC726145 PE=3 SV=1
A0A087ZPN3	38.14	6	1	1	25370	Tetraspanin OS=Apis mellifera OX=7460 PE=3 SV=1
Q9NB07	38.14	6	1	1	25326	Tetraspanin OS=Apis mellifera OX=7460 PE=2 SV=1
A0A087ZV96	38.11	6	1	1	35162	Uncharacterized protein OS=Apis mellifera OX=7460 GN=LOC411879 PE=4 SV=1
A0A088AB54	37.89	6	1	1	31968	Uncharacterized protein OS=Apis mellifera OX=7460 GN=LOC725866 PE=4 SV=1
A0A087ZSV3	35.83	6	1	1	54500	Uncharacterized protein OS=Apis mellifera OX=7460 PE=4 SV=1
A0A088AUN2	35.78	6	1	1	27366	Uncharacterized protein OS=Apis mellifera OX=7460 GN=LOC410838 PE=3 SV=1
A0A088ACK2	35.66	6	1	1	23612	Uncharacterized protein OS=Apis mellifera OX=7460 PE=4 SV=1
A0A088ABS3	34.85	6	1	1	23194	Uncharacterized protein OS=Apis mellifera OX=7460 PE=4 SV=1
A0A087ZSH1	34	6	1	1	18560	Uncharacterized protein OS=Apis mellifera OX=7460 GN=LOC726411 PE=4 SV=1
A0A088AVK4	33.91	6	1	1	20277	Peptidyl-prolyl cis-trans isomerase OS=Apis mellifera OX=7460 GN=LOC726409 PE=3 SV=1
A0A087ZPW9	32.11	6	1	1	20358	Signal peptidase complex subunit 3 OS=Apis mellifera OX=7460 GN=Spase22-23 PE=3 SV=1
A0A088ASC9	31.39	6	1	1	27083	Uncharacterized protein OS=Apis mellifera OX=7460 PE=4 SV=1
A0A087ZSF5	31.03	6	1	1	22422	Uncharacterized protein OS=Apis mellifera OX=7460 GN=LOC408477 PE=4 SV=1
A0A088AGR8	30.95	6	1	1	26963	Uncharacterized protein OS=Apis mellifera OX=7460 GN=LOC410429 PE=4 SV=1
A0A088AUW1	29.72	6	1	1	42369	Uncharacterized protein OS=Apis mellifera OX=7460 GN=Fibp PE=4 SV=1
A0A088ATE8	28.42	6	1	1	21379	Uncharacterized protein OS=Apis mellifera OX=7460 GN=LOC550992 PE=4 SV=1
A0A088AFU6	27.86	6	1	1	36324	Uncharacterized protein OS=Apis mellifera OX=7460 PE=4 SV=1
A0A088AR37	27.22	6	1	1	22782	Uncharacterized protein OS=Apis mellifera OX=7460 PE=4 SV=1
A0A088AUD3	26.86	6	1	1	13154	Uncharacterized protein OS=Apis mellifera OX=7460 PE=4 SV=1
A0A088ARQ0	26.06	6	1	1	44004	Uncharacterized protein OS=Apis mellifera OX=7460 GN=LOC413533 PE=4 SV=1
A0A088A656	204.74	7	13	13	316529	Uncharacterized protein OS=Apis mellifera OX=7460 PE=4 SV=1
A0A088AU48	204.16	7	10	10	238902	Uncharacterized protein OS=Apis mellifera OX=7460 GN=408342 PE=4 SV=1
A0A088A3X2	202.21	7	4	4	132522	Uncharacterized protein OS=Apis mellifera OX=7460 PE=4 SV=1
A0A087ZZ70	200.24	7	7	4	226775	Uncharacterized protein OS=Apis mellifera OX=7460 PE=4 SV=1
A0A087ZQJ5	183.94	7	7	4	115164	Sodium/potassium-transporting ATPase subunit alpha OS=Apis mellifera OX=7460 PE=3 SV=1
A0A088A2K6	172.95	7	3	3	75784	Uncharacterized protein OS=Apis mellifera OX=7460 GN=LOC412777 PE=3 SV=1
A0A088AN31	170.13	7	8	8	154809	Uncharacterized protein OS=Apis mellifera OX=7460 PE=4 SV=1
A0A087ZSP9	169.48	7	6	6	151026	Uncharacterized protein OS=Apis mellifera OX=7460 GN=552552 PE=3 SV=1
A0A088AI45	166.88	7	6	6	148906	Uncharacterized protein OS=Apis mellifera OX=7460 PE=4 SV=1
A0A087ZS62	162.4	7	8	8	228585	Uncharacterized protein OS=Apis mellifera OX=7460 PE=4 SV=1
A0A088AEL1	156.08	7	6	6	160969	Uncharacterized protein OS=Apis mellifera OX=7460 GN=LOC724962 PE=4 SV=1
A0A088A3I1	154.65	7	11	11	277154	Uncharacterized protein OS=Apis mellifera OX=7460 GN=LOC551620 PE=4 SV=1
A0A088A6H6	154.23	7	7	7	192051	Uncharacterized protein OS=Apis mellifera OX=7460 GN=LOC414029 PE=4 SV=1
A0A088ASE7	150.62	7	5	5	115493	Uncharacterized protein OS=Apis mellifera OX=7460 PE=4 SV=1
A0A088A629	146.87	7	2	2	51486	Uncharacterized protein OS=Apis mellifera OX=7460 GN=LOC408828 PE=4 SV=1
A0A088A6U0	146.4	7	7	7	206626	Uncharacterized protein OS=Apis mellifera OX=7460 PE=4 SV=1
A0A088AKV2	142.47	7	4	4	86954	Uncharacterized protein OS=Apis mellifera OX=7460 PE=4 SV=1
A0A087ZXF7	137.12	7	3	3	86837	Uncharacterized protein OS=Apis mellifera OX=7460 PE=3 SV=1
A0A088AP40	136.34	7	5	5	105276	Uncharacterized protein OS=Apis mellifera OX=7460 PE=3 SV=1
A0A087ZWD9	133.9	7	6	6	144292	Uncharacterized protein OS=Apis mellifera OX=7460 GN=100578159 PE=4 SV=1
A0A087ZYX9	129.09	7	3	3	78239	Transporter OS=Apis mellifera OX=7460 PE=3 SV=1
A0A087ZYV0	126.59	7	6	6	152628	Uncharacterized protein OS=Apis mellifera OX=7460 PE=4 SV=1
A0A088AQ07	124.66	7	5	5	117189	Uncharacterized protein OS=Apis mellifera OX=7460 GN=LOC551375 PE=4 SV=1
A0A087ZWE0	124.1	7	2	2	41625	Uncharacterized protein OS=Apis mellifera OX=7460 GN=LOC409870 PE=4 SV=1
A0A088AR40	123.27	7	5	5	123486	Vacuolar protein sorting-associated protein 11 homolog OS=Apis mellifera OX=7460 GN=LOC410493 PE=3 SV=1
A0A088ARI3	119.57	7	4	4	68985	Uncharacterized protein OS=Apis mellifera OX=7460 GN=LOC550885 PE=4 SV=1
A0A087ZNB0	116.11	7	2	2	57153	Uncharacterized protein OS=Apis mellifera OX=7460 GN=LOC409955 PE=4 SV=1
A0A088A215	115.65	7	6	6	156926	Uncharacterized protein OS=Apis mellifera OX=7460 GN=LOC551061 PE=4 SV=1
A0A087ZW76	115.17	7	3	3	64070	Uncharacterized protein OS=Apis mellifera OX=7460 PE=4 SV=1
A0A088AK15	114.49	7	4	4	69876	Uncharacterized protein OS=Apis mellifera OX=7460 PE=4 SV=1
A0A088A4T6	113.73	7	5	4	99326	Transporter OS=Apis mellifera OX=7460 GN=NT-5 PE=3 SV=1
A0A087ZSB8	112.97	7	4	4	98507	Uncharacterized protein OS=Apis mellifera OX=7460 GN=LOC727232 PE=4 SV=1
A0A087ZS28	111.31	7	4	4	116024	Putative ATP-dependent RNA helicase DDX46-like protein OS=Apis mellifera OX=7460 GN=LOC727008 PE=4 SV=1
A0A0B4J2P4	110.16	7	2	2	52203	Uncharacterized protein OS=Apis mellifera OX=7460 PE=3 SV=1
A0A088AHL5	109.37	7	6	6	139454	Structural maintenance of chromosomes protein OS=Apis mellifera OX=7460 GN=Cap PE=3 SV=1
A0A087ZRC1	107.09	7	2	2	72598	Angiotensin-converting enzyme OS=Apis mellifera OX=7460 PE=3 SV=1
A0A088AT64	106.41	7	2	2	55970	Uncharacterized protein OS=Apis mellifera OX=7460 PE=4 SV=1
A0A088AFJ6	104.58	7	5	5	128039	Uncharacterized protein OS=Apis mellifera OX=7460 PE=4 SV=1
A0A087ZXB2	99.02	7	2	2	53322	Protoporphyrinogen oxidase OS=Apis mellifera OX=7460 GN=Ppox PE=3 SV=1
A0A088ABA4	96.44	7	3	3	88228	Uncharacterized protein OS=Apis mellifera OX=7460 GN=LOC412505 PE=4 SV=1
A0A088AT95	91.77	7	3	3	65580	Uncharacterized protein OS=Apis mellifera OX=7460 GN=LOC551889 PE=4 SV=1
A0A088ALL8	90.95	7	3	3	99889	Uncharacterized protein OS=Apis mellifera OX=7460 GN=LOC408693 PE=4 SV=1
A0A087ZRG0	90.29	7	4	4	104400	Uncharacterized protein OS=Apis mellifera OX=7460 GN=100576404 PE=4 SV=1
A0A088A1D1	90.14	7	4	4	103214	Uncharacterized protein OS=Apis mellifera OX=7460 PE=3 SV=1
A0A087ZV67	89.93	7	3	3	71355	Uncharacterized protein OS=Apis mellifera OX=7460 GN=LOC411476 PE=4 SV=1
A0A087ZQM0	87.39	7	2	2	60532	Uncharacterized protein OS=Apis mellifera OX=7460 GN=LOC409924 PE=4 SV=1
A0A088ANW9	84.61	7	2	2	57286	Uncharacterized protein OS=Apis mellifera OX=7460 GN=LOC408989 PE=3 SV=1
A0A087ZNT8	84.27	7	1	1	23443	Uncharacterized protein OS=Apis mellifera OX=7460 PE=3 SV=1
A0A088ADZ2	83.82	7	2	2	47578	Uncharacterized protein OS=Apis mellifera OX=7460 PE=4 SV=1
A0A088A4D7	83.61	7	2	1	43562	Uncharacterized protein OS=Apis mellifera OX=7460 GN=LOC410906 PE=4 SV=1
A0A088ANZ5	83.33	7	1	1	47575	Uncharacterized protein OS=Apis mellifera OX=7460 PE=4 SV=1
A0A088A145	82.14	7	3	3	92997	Uncharacterized protein OS=Apis mellifera OX=7460 GN=Cbp80 PE=4 SV=1
A0A087ZRD5	81.46	7	2	2	46389	Uncharacterized protein OS=Apis mellifera OX=7460 GN=LOC412303 PE=4 SV=1
A0A088ANF9	81.09	7	2	2	41628	Uncharacterized protein OS=Apis mellifera OX=7460 GN=LOC412149 PE=4 SV=1
A0A088A9T9	81.01	7	2	2	55930	Uncharacterized protein OS=Apis mellifera OX=7460 GN=LOC408902 PE=4 SV=1
A0A087ZXP3	79.36	7	2	2	52608	Uncharacterized protein OS=Apis mellifera OX=7460 PE=3 SV=1
A0A088APX1	79.02	7	2	2	59327	Uncharacterized protein OS=Apis mellifera OX=7460 PE=4 SV=1
A0A087ZW57	78.58	7	1	1	32463	Uncharacterized protein OS=Apis mellifera OX=7460 PE=4 SV=1
A0A087ZVW5	78.21	7	1	1	24728	Uncharacterized protein OS=Apis mellifera OX=7460 GN=LOC409129 PE=4 SV=1
A0A088ARI7	77.04	7	4	4	101876	Uncharacterized protein OS=Apis mellifera OX=7460 PE=4 SV=1
A0A087ZR38	76.54	7	1	1	42628	Uncharacterized protein OS=Apis mellifera OX=7460 GN=Trp1 PE=4 SV=1
A0A088APU4	76.47	7	1	1	30291	Uncharacterized protein OS=Apis mellifera OX=7460 GN=551215 PE=4 SV=1
A0A088AMF3	76.32	7	2	2	54956	Glycylpeptide N-tetradecanoyltransferase OS=Apis mellifera OX=7460 PE=3 SV=1
A0A088ASD4	75.67	7	2	2	65214	Uncharacterized protein OS=Apis mellifera OX=7460 GN=LOC551840 PE=4 SV=1
A0A088ABI6	74.39	7	3	3	68110	Uncharacterized protein OS=Apis mellifera OX=7460 PE=3 SV=1
A0A087ZTJ6	74.24	7	3	3	64863	Uncharacterized protein OS=Apis mellifera OX=7460 PE=4 SV=1
A0A088A0Z3	71.94	7	2	2	42951	Uncharacterized protein OS=Apis mellifera OX=7460 GN=Arp11 PE=3 SV=1
A0A088A7Q7	71.7	7	2	2	59191	Uncharacterized protein OS=Apis mellifera OX=7460 GN=PRPF4 PE=4 SV=1
A0A0H3V199	71.48	7	2	2	62511	Nicotinic acetylcholine receptor alpha7 subunit OS=Apis mellifera OX=7460 GN=nAChRalpha7 PE=2 SV=1
Q6RFT1	71.48	7	2	2	62481	Neuronal nicotinic acetylcholine receptor alpha7-1 OS=Apis mellifera OX=7460 PE=2 SV=1
A0A087ZWY9	69.89	7	2	2	37216	Uncharacterized protein OS=Apis mellifera OX=7460 PE=4 SV=1
A0A087ZVD1	69.5	7	2	2	53138	Uncharacterized protein OS=Apis mellifera OX=7460 PE=4 SV=1
A0A088A6C4	68.99	7	2	2	51698	Uncharacterized protein OS=Apis mellifera OX=7460 GN=LOC410965 PE=4 SV=1
A0A088AFG0	68.95	7	2	2	45237	Protein farnesyltransferase subunit beta OS=Apis mellifera OX=7460 PE=3 SV=1
A0A0H3V2Z7	68.11	7	3	3	50004	Disulfide-isomerase TMX3-like protein OS=Apis mellifera OX=7460 GN=LOC726237 PE=2 SV=1
A0A088A7L7	68.11	7	3	3	48766	Uncharacterized protein OS=Apis mellifera OX=7460 PE=4 SV=1
A0A088AHM0	67.94	7	2	2	43764	Uncharacterized protein OS=Apis mellifera OX=7460 GN=Unc-76 PE=4 SV=1
A0A088A0F6	67.14	7	2	2	80791	Uncharacterized protein OS=Apis mellifera OX=7460 GN=LOC726336 PE=4 SV=1
A0A088APM4	66.9	7	2	2	59306	Glucosylceramidase OS=Apis mellifera OX=7460 GN=LOC409708 PE=3 SV=1
A0A088ATM7	65.92	7	3	3	93003	Uncharacterized protein OS=Apis mellifera OX=7460 GN=SPATA20 PE=4 SV=1
A0A088AC57	65.67	7	1	1	19016	RNA-binding protein 8A OS=Apis mellifera OX=7460 GN=tsu PE=3 SV=1
A0A088AMR6	64.47	7	3	3	80972	Uncharacterized protein OS=Apis mellifera OX=7460 PE=4 SV=1
A0A087ZTN5	64.18	7	1	1	17832	Uncharacterized protein OS=Apis mellifera OX=7460 GN=LOC410663 PE=4 SV=1
A0A088A5M4	63.78	7	1	1	34858	Uncharacterized protein OS=Apis mellifera OX=7460 GN=LOC551229 PE=4 SV=1
A0A087ZVB1	63.6	7	1	1	21791	Uncharacterized protein OS=Apis mellifera OX=7460 PE=4 SV=1
A0A088AD82	63.51	7	2	2	67929	Uncharacterized protein OS=Apis mellifera OX=7460 GN=551474 PE=4 SV=1
A0A088AE32	63.4	7	2	2	36819	Uncharacterized protein OS=Apis mellifera OX=7460 PE=4 SV=1
A0A088APS1	62.87	7	2	2	50119	Uncharacterized protein OS=Apis mellifera OX=7460 GN=lkb1 PE=3 SV=1
A0A087ZYT8	62.63	7	1	1	23050	Uncharacterized protein OS=Apis mellifera OX=7460 GN=726308 PE=4 SV=1
A0A088A4F2	62.63	7	1	1	20698	Uncharacterized protein OS=Apis mellifera OX=7460 PE=4 SV=1
A0A088AFF2	62.63	7	1	1	21259	Uncharacterized protein OS=Apis mellifera OX=7460 PE=4 SV=1
A0A087ZT79	62.35	7	3	3	78112	Uncharacterized protein OS=Apis mellifera OX=7460 PE=4 SV=1
O77136	62.35	7	3	3	78124	Translation initiation factor 2 OS=Apis mellifera OX=7460 PE=2 SV=2
A0A088AER4	61.02	7	2	2	64701	Uncharacterized protein OS=Apis mellifera OX=7460 GN=LOC727031 PE=3 SV=1
A0A087ZR72	59.64	7	1	1	25783	Uncharacterized protein OS=Apis mellifera OX=7460 PE=4 SV=1
A0A088AGA7	59.49	7	3	3	65860	Uncharacterized protein OS=Apis mellifera OX=7460 GN=LOC409270 PE=4 SV=1
A0A088A7R6	59.35	7	2	2	34726	Protein BCCIP homolog OS=Apis mellifera OX=7460 PE=3 SV=1
A0A088A0U5	58.03	7	1	1	48137	Uncharacterized protein OS=Apis mellifera OX=7460 GN=CstF-64 PE=4 SV=1
A0A088AI31	57.02	7	1	1	61534	Uncharacterized protein OS=Apis mellifera OX=7460 GN=LOC408280 PE=4 SV=1
A0A088AUR8	55.69	7	1	1	22286	Uncharacterized protein OS=Apis mellifera OX=7460 GN=LOC724852 PE=4 SV=1
A0A088ARZ0	55.24	7	2	2	57083	Uncharacterized protein OS=Apis mellifera OX=7460 GN=LOC724123 PE=3 SV=1
A0A088AJ46	54.32	7	2	2	82200	Uncharacterized protein OS=Apis mellifera OX=7460 PE=4 SV=1
A0A088AM73	52.07	7	1	1	20956	Uncharacterized protein OS=Apis mellifera OX=7460 GN=LOC409862 PE=4 SV=1
A0A088AJ32	51.6	7	1	1	31111	Uncharacterized protein OS=Apis mellifera OX=7460 PE=4 SV=1
A0A088ATS9	51.59	7	1	1	26464	Uncharacterized protein OS=Apis mellifera OX=7460 PE=4 SV=1
A0A087ZQ51	51	7	1	1	28222	Proteasome assembly chaperone 2 OS=Apis mellifera OX=7460 GN=LOC726900 PE=3 SV=1
A0A088AN58	50.7	7	1	1	20319	Uncharacterized protein OS=Apis mellifera OX=7460 PE=4 SV=1
A0A088AAU4	50.28	7	1	1	27723	Uncharacterized protein OS=Apis mellifera OX=7460 PE=4 SV=1
A0A088AAD0	48.65	7	1	1	29806	Uncharacterized protein OS=Apis mellifera OX=7460 GN=DHRS4 PE=4 SV=1
A0A087ZNZ6	47.67	7	2	2	41615	Uncharacterized protein OS=Apis mellifera OX=7460 GN=LOC551301 PE=3 SV=1
A0A088AJT1	45.98	7	1	1	28667	Uncharacterized protein OS=Apis mellifera OX=7460 GN=LOC726887 PE=4 SV=1
A0A088AD43	45.08	7	1	1	28269	Uncharacterized protein OS=Apis mellifera OX=7460 GN=U2af38 PE=4 SV=1
A0A088A399	44.4	7	1	1	23817	Uncharacterized protein OS=Apis mellifera OX=7460 GN=mRpL40 PE=4 SV=1
B2D0J5	42.37	7	2	2	63637	Venom carboxylesterase-6 OS=Apis mellifera OX=7460 PE=2 SV=1
A0A088AML9	39.37	7	1	1	28992	Uncharacterized protein OS=Apis mellifera OX=7460 PE=4 SV=1
A0A088A4F9	37.9	7	1	1	19537	Uncharacterized protein OS=Apis mellifera OX=7460 GN=100577418 PE=4 SV=1
A0A087ZYK5	37.32	7	1	1	22988	Uncharacterized protein OS=Apis mellifera OX=7460 GN=LOC410376 PE=4 SV=1
A0A087ZT53	36.99	7	1	1	15247	Uncharacterized protein OS=Apis mellifera OX=7460 PE=4 SV=1
A0A088ARU2	36.31	7	1	1	13937	Uncharacterized protein OS=Apis mellifera OX=7460 GN=LOC725315 PE=4 SV=1
A0A088AD81	36.03	7	1	1	13417	Uncharacterized protein OS=Apis mellifera OX=7460 GN=725855 PE=4 SV=1
A0A088A6P5	34.82	7	1	1	20602	Uncharacterized protein OS=Apis mellifera OX=7460 PE=4 SV=1
A0A087ZS63	33.86	7	1	1	37626	Uncharacterized protein OS=Apis mellifera OX=7460 GN=LOC410567 PE=4 SV=1
A0A088ARA8	33.75	7	1	1	20380	Uncharacterized protein OS=Apis mellifera OX=7460 GN=LOC725055 PE=4 SV=1
A0A0B4J2M9	33.35	7	1	1	29899	Pyrroline-5-carboxylate reductase OS=Apis mellifera OX=7460 GN=LOC412234 PE=3 SV=1
A0A088AKY3	32.88	7	1	1	14681	Uncharacterized protein OS=Apis mellifera OX=7460 PE=4 SV=1
A0A087ZT54	31.26	7	1	1	18912	Uncharacterized protein OS=Apis mellifera OX=7460 PE=4 SV=1
A0A088A0H5	29.68	7	1	1	13726	Uncharacterized protein OS=Apis mellifera OX=7460 GN=LOC725733 PE=4 SV=1
A0A087ZXK8	28.43	7	1	1	32873	Uncharacterized protein OS=Apis mellifera OX=7460 GN=100577121 PE=4 SV=1
A0A088ARX6	26.39	7	1	1	27191	Uncharacterized protein OS=Apis mellifera OX=7460 PE=3 SV=1
Q6XPZ7	26.39	7	1	1	27192	Short-chain dehydrogenase/reductase OS=Apis mellifera OX=7460 PE=2 SV=1
A0A088ACE7	26.24	7	1	1	20520	Uncharacterized protein OS=Apis mellifera OX=7460 GN=LOC551458 PE=4 SV=1
A0A087ZT18	26.11	7	1	1	20995	Uncharacterized protein OS=Apis mellifera OX=7460 PE=4 SV=1
A0A088AV96	236.19	8	25	25	584537	Uncharacterized protein OS=Apis mellifera OX=7460 PE=4 SV=1
A0A088AIJ8	213.53	8	17	17	372815	Uncharacterized protein OS=Apis mellifera OX=7460 PE=4 SV=1
A0A088A3H1	185.94	8	7	7	166871	Uncharacterized protein OS=Apis mellifera OX=7460 PE=4 SV=1
A0A087ZSL5	183.64	8	10	10	223027	Uncharacterized protein OS=Apis mellifera OX=7460 GN=LOC552031 PE=4 SV=1
A0A088ALI5	182.7	8	6	6	166780	Uncharacterized protein OS=Apis mellifera OX=7460 PE=4 SV=1
A0A087ZRF5	180.74	8	4	4	97262	Uncharacterized protein OS=Apis mellifera OX=7460 PE=4 SV=1
A0A088AUA9	174.18	8	3	3	57610	Uncharacterized protein OS=Apis mellifera OX=7460 PE=3 SV=1
A0A088ARE6	166.86	8	10	10	224411	Uncharacterized protein OS=Apis mellifera OX=7460 GN=Spn PE=4 SV=1
A0A088ANA5	162.41	8	3	3	75344	Uncharacterized protein OS=Apis mellifera OX=7460 PE=4 SV=1
A0A088A104	159.76	8	6	6	125502	Uncharacterized protein OS=Apis mellifera OX=7460 GN=Upf1 PE=4 SV=1
A0A087ZWA3	157.29	8	7	7	144013	Uncharacterized protein OS=Apis mellifera OX=7460 PE=3 SV=1
A0A088A9Q7	149.24	8	6	6	147500	Ubiquitin carboxyl-terminal hydrolase OS=Apis mellifera OX=7460 GN=LOC408911 PE=3 SV=1
A0A087ZZJ4	143.67	8	5	5	115394	Uncharacterized protein OS=Apis mellifera OX=7460 PE=4 SV=1
A0A087ZY17	142.37	8	4	4	105701	Uncharacterized protein OS=Apis mellifera OX=7460 GN=LOC413977 PE=4 SV=1
A0A087ZMS4	142.21	8	6	6	119390	Uncharacterized protein OS=Apis mellifera OX=7460 GN=Ge-1 PE=4 SV=1
A0A087ZS76	132.69	8	4	4	89176	Uncharacterized protein OS=Apis mellifera OX=7460 GN=Nep3 PE=4 SV=1
A0A087ZP72	132.5	8	3	3	59750	Uncharacterized protein OS=Apis mellifera OX=7460 GN=LOC409089 PE=4 SV=1
A0A087ZXV1	123.35	8	5	5	101315	Uncharacterized protein OS=Apis mellifera OX=7460 PE=4 SV=1
A0A087ZPA6	119.03	8	5	5	99825	Uncharacterized protein OS=Apis mellifera OX=7460 PE=4 SV=1
A0A088ASZ6	110.96	8	2	2	20464	Transgelin OS=Apis mellifera OX=7460 GN=Mp20 PE=3 SV=1
A0A087ZRN6	110.52	8	5	5	84989	Uncharacterized protein OS=Apis mellifera OX=7460 GN=LOC411167 PE=3 SV=1
A0A088ASD0	110.52	8	2	2	45320	Uncharacterized protein OS=Apis mellifera OX=7460 GN=LOC551980 PE=4 SV=1
A0A088AAB7	107.81	8	4	4	114498	Uncharacterized protein OS=Apis mellifera OX=7460 GN=LOC413683 PE=4 SV=1
A0A087ZYU3	106.92	8	4	4	81944	Uncharacterized protein OS=Apis mellifera OX=7460 PE=4 SV=1
A0A088AC55	106.38	8	2	2	32696	Uncharacterized protein OS=Apis mellifera OX=7460 PE=4 SV=1
A0A088ANN1	102.56	8	2	2	25802	Uncharacterized protein OS=Apis mellifera OX=7460 GN=LOC408621 PE=4 SV=1
A0A087ZZR2	100.83	8	2	2	58901	Uncharacterized protein OS=Apis mellifera OX=7460 GN=LOC412707 PE=4 SV=1
A0A088ACC6	100.5	8	3	3	70814	Uncharacterized protein OS=Apis mellifera OX=7460 PE=4 SV=1
A0A087ZPB7	99.04	8	1	1	22472	Uncharacterized protein OS=Apis mellifera OX=7460 GN=LOC412864 PE=4 SV=1
A0A087ZR82	98.06	8	1	1	18597	Uncharacterized protein OS=Apis mellifera OX=7460 GN=LOC411664 PE=4 SV=1
A0A088AQ71	97.92	8	4	4	73365	Uncharacterized protein OS=Apis mellifera OX=7460 GN=LOC411227 PE=4 SV=1
X2JFT9	96.69	8	1	1	23583	Ribosomal protein L19 OS=Apis mellifera OX=7460 GN=rpl19 PE=2 SV=1
A0A087ZP47	96.37	8	1	1	21717	Uncharacterized protein OS=Apis mellifera OX=7460 GN=LOC410017 PE=4 SV=1
A0A088AUZ0	96	8	3	3	55068	Uncharacterized protein OS=Apis mellifera OX=7460 GN=Ero1L PE=4 SV=1
A0A088AR65	95.65	8	1	1	28063	Cytosolic Fe-S cluster assembly factor NUBP2 homolog OS=Apis mellifera OX=7460 GN=LOC410516 PE=3 SV=1
A0A088AT21	93.39	8	5	5	77420	Uncharacterized protein OS=Apis mellifera OX=7460 GN=Aats-arg PE=3 SV=1
A0A088A6S1	89.61	8	2	2	34899	Serine/threonine-protein phosphatase OS=Apis mellifera OX=7460 GN=PpV PE=3 SV=1
A0A087ZYD6	87.28	8	2	2	44485	Mitogen-activated protein kinase OS=Apis mellifera OX=7460 PE=4 SV=1
A0A088ABD2	86.71	8	2	2	48728	Uncharacterized protein OS=Apis mellifera OX=7460 PE=4 SV=1
A0A088AUS5	85.35	8	5	5	80632	Oxysterol-binding protein OS=Apis mellifera OX=7460 PE=3 SV=1
A0A088AER0	85.23	8	2	2	49385	Uncharacterized protein OS=Apis mellifera OX=7460 PE=4 SV=1
A0A087ZSN9	83.9	8	4	4	79366	Uncharacterized protein OS=Apis mellifera OX=7460 GN=LOC726637 PE=4 SV=1
A0A088AFC7	82.91	8	2	2	50881	Serine/threonine-protein phosphatase 2A 55 kDa regulatory subunit B OS=Apis mellifera OX=7460 GN=tws PE=3 SV=1
A0A088A6Q2	80.47	8	1	1	26768	Uncharacterized protein OS=Apis mellifera OX=7460 GN=LOC410079 PE=4 SV=1
A0A087ZR58	79.08	8	2	2	41585	Uncharacterized protein OS=Apis mellifera OX=7460 GN=100576333 PE=4 SV=1
A0A087ZUK2	76.68	8	2	2	34132	Uncharacterized protein OS=Apis mellifera OX=7460 GN=LOC413065 PE=4 SV=1
A0A088AV36	76.19	8	1	1	17121	Uncharacterized protein OS=Apis mellifera OX=7460 GN=GST-mic1 PE=4 SV=1
A0A088A5K6	71.71	8	2	2	53369	Uncharacterized protein OS=Apis mellifera OX=7460 GN=LOC408701 PE=3 SV=1
A0A088A003	71.3	8	2	2	14746	40S ribosomal protein S30 OS=Apis mellifera OX=7460 GN=RpS30 PE=3 SV=1
A0A088A935	70.33	8	2	2	53695	Uncharacterized protein OS=Apis mellifera OX=7460 PE=4 SV=1
A0A088ALI8	66.2	8	1	1	26924	Uncharacterized protein OS=Apis mellifera OX=7460 PE=4 SV=1
A0A088ADL3	64.97	8	2	2	47830	Uncharacterized protein OS=Apis mellifera OX=7460 GN=trus PE=4 SV=1
A0A087ZSV5	64.8	8	2	2	41037	Uncharacterized protein OS=Apis mellifera OX=7460 GN=LOC411280 PE=4 SV=1
A0A088A204	62.77	8	1	1	29580	Uncharacterized protein OS=Apis mellifera OX=7460 GN=mRpS2 PE=3 SV=1
A0A088ANW0	61.41	8	2	2	43259	Uncharacterized protein OS=Apis mellifera OX=7460 GN=LOC411305 PE=3 SV=1
A0A088AP79	61.06	8	1	1	24277	Uncharacterized protein OS=Apis mellifera OX=7460 GN=LOC409790 PE=4 SV=1
A0A087ZX21	57.93	8	2	2	46524	Uncharacterized protein OS=Apis mellifera OX=7460 GN=Spred PE=4 SV=1
A0A088APV9	57.9	8	1	1	19485	Uncharacterized protein OS=Apis mellifera OX=7460 GN=LOC413997 PE=4 SV=1
A0A087ZRG5	57.45	8	1	1	11497	Uncharacterized protein OS=Apis mellifera OX=7460 GN=726937 PE=4 SV=1
A0A088AA09	56.16	8	1	1	22937	Uncharacterized protein OS=Apis mellifera OX=7460 GN=LOC410415 PE=4 SV=1
A0A087ZZH7	53.26	8	2	2	35034	Uncharacterized protein OS=Apis mellifera OX=7460 GN=408915 PE=4 SV=1
A0A088ASZ5	52.66	8	1	1	14727	Uncharacterized protein OS=Apis mellifera OX=7460 GN=LOC552560 PE=4 SV=1
A0A088A500	50.99	8	1	1	28776	Uncharacterized protein OS=Apis mellifera OX=7460 PE=3 SV=1
A0A088AK91	49.61	8	2	2	42301	Methionine aminopeptidase OS=Apis mellifera OX=7460 GN=LOC410385 PE=3 SV=1
A0A088A9Y7	49.18	8	1	1	13348	Uncharacterized protein OS=Apis mellifera OX=7460 GN=mRpL53 PE=4 SV=1
A0A088A2S6	48.94	8	1	1	26023	Uncharacterized protein OS=Apis mellifera OX=7460 GN=LOC724666 PE=4 SV=1
A0A087ZY76	44.65	8	1	1	26633	Uncharacterized protein OS=Apis mellifera OX=7460 GN=LOC409454 PE=4 SV=1
A0A088AQ41	42.37	8	2	2	58414	Carboxylic ester hydrolase OS=Apis mellifera OX=7460 PE=3 SV=1
A0A088AFC0	34.28	8	1	1	25641	Uncharacterized protein OS=Apis mellifera OX=7460 GN=mRpS26 PE=4 SV=1
A0A088AGB2	33.85	8	1	1	23024	Uncharacterized protein OS=Apis mellifera OX=7460 GN=102654261 PE=4 SV=1
A0A088A899	31.67	8	1	1	16130	Uncharacterized protein OS=Apis mellifera OX=7460 PE=4 SV=1
A0A088AJC5	31.17	8	1	1	19284	Uncharacterized protein OS=Apis mellifera OX=7460 GN=Cetn2 PE=4 SV=1
A0A088AAI2	29.41	8	1	1	22137	Uncharacterized protein OS=Apis mellifera OX=7460 GN=mRpS18B PE=4 SV=1
A0A088ABQ1	28.93	8	1	1	23648	Uncharacterized protein OS=Apis mellifera OX=7460 PE=4 SV=1
A0A088AHT6	28.93	8	1	1	26272	Uncharacterized protein OS=Apis mellifera OX=7460 GN=LOC552042 PE=4 SV=1
A0A088A6R9	28.69	8	1	1	33216	Uncharacterized protein OS=Apis mellifera OX=7460 GN=LOC551537 PE=3 SV=1
A0A088AW12	28.51	8	1	1	18243	Uncharacterized protein OS=Apis mellifera OX=7460 PE=4 SV=1
A0A088AJB4	27.52	8	1	1	17701	Uncharacterized protein OS=Apis mellifera OX=7460 GN=mRpS6 PE=4 SV=1
A0A087ZRI9	26.47	8	1	1	36960	Uncharacterized protein OS=Apis mellifera OX=7460 PE=3 SV=1
A0A088A7M7	263.51	9	11	11	171079	Uncharacterized protein OS=Apis mellifera OX=7460 PE=4 SV=1
A0A088AHI9	231.65	9	14	14	316397	Uncharacterized protein OS=Apis mellifera OX=7460 GN=RANBP2 PE=4 SV=1
A0A087ZSV8	229.78	9	8	8	160143	Uncharacterized protein OS=Apis mellifera OX=7460 PE=4 SV=1
A0A087ZQS4	228.39	9	20	20	374858	Uncharacterized protein OS=Apis mellifera OX=7460 PE=4 SV=1
A0A088A412	177.21	9	4	4	89767	Uncharacterized protein OS=Apis mellifera OX=7460 PE=4 SV=1
A0A088ANI3	173.64	9	8	8	144348	Uncharacterized protein OS=Apis mellifera OX=7460 GN=Aats-ile PE=3 SV=1
A0A088A8Y4	168.62	9	12	12	223096	Uncharacterized protein OS=Apis mellifera OX=7460 GN=msps PE=4 SV=1
A0A087ZNK6	165.91	9	6	6	129987	Uncharacterized protein OS=Apis mellifera OX=7460 PE=4 SV=1
A0A088A2E0	164.13	9	5	5	119249	Uncharacterized protein OS=Apis mellifera OX=7460 GN=GARNL3 PE=4 SV=1
A0A088A060	161.94	9	7	7	121672	Uncharacterized protein OS=Apis mellifera OX=7460 PE=4 SV=1
A0A088ARB4	161.32	9	9	9	147786	Uncharacterized protein OS=Apis mellifera OX=7460 PE=4 SV=1
A0A088AJI0	150	9	6	6	128875	Uncharacterized protein OS=Apis mellifera OX=7460 PE=4 SV=1
A0A087ZMS3	140.72	9	4	4	101064	Diacylglycerol kinase OS=Apis mellifera OX=7460 GN=Dgk PE=3 SV=1
A0A088A432	137.47	9	6	6	103277	Uncharacterized protein OS=Apis mellifera OX=7460 PE=4 SV=1
A0A087ZZ41	137.17	9	4	4	67391	Uncharacterized protein OS=Apis mellifera OX=7460 GN=Sac1 PE=4 SV=1
A0A088A1C1	135.13	9	2	2	61132	Uncharacterized protein OS=Apis mellifera OX=7460 GN=LOC410341 PE=4 SV=1
A0A088AHB9	132.23	9	4	4	77073	Solute carrier organic anion transporter family member OS=Apis mellifera OX=7460 GN=LOC409649 PE=3 SV=1
A0A088AUI7	131.96	9	5	5	104987	Uncharacterized protein OS=Apis mellifera OX=7460 PE=4 SV=1
A0A088AI19	131.02	9	3	3	69634	Uncharacterized protein OS=Apis mellifera OX=7460 GN=726273 PE=4 SV=1
A0A088AEX4	130.99	9	7	7	114500	Uncharacterized protein OS=Apis mellifera OX=7460 PE=4 SV=1
A0A088A8P9	130.49	9	4	4	87730	Protein kinase C OS=Apis mellifera OX=7460 GN=aPKC PE=3 SV=1
A0A088A9P3	129.49	9	7	7	121472	Uncharacterized protein OS=Apis mellifera OX=7460 GN=LOC412817 PE=4 SV=1
A0A087ZUQ9	127.27	9	7	7	126964	1-phosphatidylinositol 4 5-bisphosphate phosphodiesterase OS=Apis mellifera OX=7460 PE=4 SV=1
A0A088A186	126.82	9	2	2	33219	Uncharacterized protein OS=Apis mellifera OX=7460 PE=3 SV=1
A0A088AGL0	126.54	9	2	2	51860	Uncharacterized protein OS=Apis mellifera OX=7460 PE=3 SV=1
A0A088A702	126.35	9	4	4	73335	Uncharacterized protein OS=Apis mellifera OX=7460 PE=4 SV=1
A0A087ZQJ3	124.51	9	4	4	79268	Protein tweety homolog OS=Apis mellifera OX=7460 PE=3 SV=1
A0A088AFU5	123.87	9	3	3	64609	Uncharacterized protein OS=Apis mellifera OX=7460 PE=4 SV=1
A0A088AUV5	119.98	9	5	5	68674	Uncharacterized protein OS=Apis mellifera OX=7460 GN=LOC410806 PE=3 SV=1
A0A088ALK7	112.94	9	2	2	40400	Uncharacterized protein OS=Apis mellifera OX=7460 PE=4 SV=1
A0A088AVC4	112.83	9	1	1	26730	Uncharacterized protein OS=Apis mellifera OX=7460 GN=LOC551768 PE=4 SV=1
A0A087ZYN6	112.11	9	5	5	139653	Uncharacterized protein OS=Apis mellifera OX=7460 GN=LOC725665 PE=4 SV=1
A0A088ABP0	111.3	9	2	2	52846	Uncharacterized protein OS=Apis mellifera OX=7460 PE=4 SV=1
A0A088A534	110.33	9	2	2	33964	Uncharacterized protein OS=Apis mellifera OX=7460 GN=Syx17 PE=4 SV=1
A0A088A8X1	105.09	9	3	3	66603	Uncharacterized protein OS=Apis mellifera OX=7460 GN=LOC411122 PE=4 SV=1
A0A088A0F8	101.24	9	4	4	88004	Uncharacterized protein OS=Apis mellifera OX=7460 GN=Cat PE=4 SV=1
A0A088ARU9	101.03	9	3	3	79608	Glycogen [starch] synthase OS=Apis mellifera OX=7460 GN=LOC552328 PE=3 SV=1
A0A088AHT7	97.95	9	3	3	50719	Uncharacterized protein OS=Apis mellifera OX=7460 PE=4 SV=1
A0A088AUR4	95.29	9	2	2	22449	Uncharacterized protein OS=Apis mellifera OX=7460 GN=Drep-1 PE=4 SV=1
A0A088A8A7	92.66	9	2	2	24577	40S ribosomal protein S7 OS=Apis mellifera OX=7460 GN=RpS7 PE=3 SV=1
A0A088AEV2	92.3	9	1	1	17361	Uncharacterized protein OS=Apis mellifera OX=7460 GN=RpL26 PE=4 SV=1
A0A088AEK7	90.08	9	4	4	59058	Uncharacterized protein OS=Apis mellifera OX=7460 GN=CYP6AS7 PE=3 SV=1
A0A088A6W4	89.9	9	2	2	32444	Uncharacterized protein OS=Apis mellifera OX=7460 PE=4 SV=1
A0A088AC30	88.87	9	2	2	39323	Uncharacterized protein OS=Apis mellifera OX=7460 GN=LOC410740 PE=4 SV=1
A0A088AVC9	84.71	9	1	1	26581	Uncharacterized protein OS=Apis mellifera OX=7460 GN=LOC413613 PE=4 SV=1
A0A088AW81	84.47	9	2	2	42500	Uncharacterized protein OS=Apis mellifera OX=7460 GN=LOC411858 PE=3 SV=1
Q3B710	84.31	9	2	2	44966	Troponin H isoform 2 OS=Apis mellifera OX=7460 GN=TpnH PE=4 SV=1
C9WMM5	84.07	9	3	3	53703	Venom serine carboxypeptidase OS=Apis mellifera OX=7460 PE=2 SV=1
A0A087ZPZ2	79.45	9	5	5	78973	Uncharacterized protein OS=Apis mellifera OX=7460 GN=LOC552294 PE=4 SV=1
A0A087ZWX8	79.31	9	1	1	18328	Uncharacterized protein OS=Apis mellifera OX=7460 GN=LOC727300 PE=4 SV=1
A0A088AJR5	78.44	9	3	3	53264	Uncharacterized protein OS=Apis mellifera OX=7460 GN=LOC410148 PE=4 SV=1
A0A088AHT1	77.37	9	3	3	59280	Uncharacterized protein OS=Apis mellifera OX=7460 GN=LOC410208 PE=4 SV=1
A0A087ZVF7	77.32	9	4	4	62994	Uncharacterized protein OS=Apis mellifera OX=7460 PE=4 SV=1
A0A088AUM9	75.2	9	2	2	27010	Uncharacterized protein OS=Apis mellifera OX=7460 GN=100577661 PE=4 SV=1
A0A088A0J4	75.14	9	2	2	43276	Diphosphomevalonate decarboxylase OS=Apis mellifera OX=7460 GN=LOC725817 PE=3 SV=1
A0A088A008	73.91	9	2	2	57653	Uncharacterized protein OS=Apis mellifera OX=7460 PE=4 SV=1
A0A087ZT75	73.55	9	4	4	82994	Uncharacterized protein OS=Apis mellifera OX=7460 GN=LOC552574 PE=4 SV=1
A0A088A4W8	73.04	9	1	1	24196	Uncharacterized protein OS=Apis mellifera OX=7460 GN=LOC724516 PE=4 SV=1
A0A088AMD5	71.52	9	1	1	19243	Uncharacterized protein OS=Apis mellifera OX=7460 GN=SdhC PE=4 SV=1
A0A088A4U8	71.13	9	1	1	19707	Uncharacterized protein OS=Apis mellifera OX=7460 PE=4 SV=1
A0A088ALN8	70.49	9	1	1	16283	Uncharacterized protein OS=Apis mellifera OX=7460 GN=LOC413845 PE=3 SV=1
A0A088A5G7	69.9	9	1	1	19241	Uncharacterized protein OS=Apis mellifera OX=7460 GN=LOC552599 PE=4 SV=1
A0A088AHE9	68.63	9	2	2	34987	Uncharacterized protein OS=Apis mellifera OX=7460 PE=4 SV=1
A0A088ANS0	67.84	9	2	2	38810	Nicotinamide-nucleotide adenylyltransferase OS=Apis mellifera OX=7460 PE=3 SV=1
A0A088A8P1	67.07	9	1	1	24097	Uncharacterized protein OS=Apis mellifera OX=7460 GN=100577325 PE=4 SV=1
A0A088AW94	65.45	9	2	2	30440	Uncharacterized protein OS=Apis mellifera OX=7460 GN=Surf4 PE=4 SV=1
A0A088A4L3	63.39	9	1	1	16441	OBP18 OS=Apis mellifera OX=7460 PE=4 SV=1
A0A088AT08	62.95	9	1	1	26070	Uncharacterized protein OS=Apis mellifera OX=7460 GN=LOC408614 PE=4 SV=1
A0A087ZRE7	62.64	9	1	1	21003	H/ACA ribonucleoprotein complex subunit OS=Apis mellifera OX=7460 GN=LOC413686 PE=3 SV=1
A0A087ZP77	62.24	9	1	1	26834	Uncharacterized protein OS=Apis mellifera OX=7460 PE=4 SV=1
A0A087ZTN8	59.11	9	1	1	33327	Uncharacterized protein OS=Apis mellifera OX=7460 GN=LOC410665 PE=4 SV=1
A0A088ASM7	56.87	9	1	1	13602	Uncharacterized protein OS=Apis mellifera OX=7460 GN=LOC408547 PE=4 SV=1
A0A088AN38	56.07	9	1	1	23850	Uncharacterized protein OS=Apis mellifera OX=7460 GN=LOC408773 PE=4 SV=1
A0A087ZUE4	56.03	9	2	2	36472	Uncharacterized protein OS=Apis mellifera OX=7460 PE=3 SV=1
A0A088AUC3	54.21	9	2	2	46604	Uncharacterized protein OS=Apis mellifera OX=7460 GN=LOC410702 PE=4 SV=1
A0A088ASM8	53.53	9	1	1	22110	Uncharacterized protein OS=Apis mellifera OX=7460 GN=mRpL35 PE=4 SV=1
A0A088AL91	53.48	9	2	2	48232	Uncharacterized protein OS=Apis mellifera OX=7460 GN=Hr78 PE=3 SV=1
A0A088AC71	52.15	9	1	1	20397	Uncharacterized protein OS=Apis mellifera OX=7460 GN=zetaCOP PE=4 SV=1
A0A088ARU3	51.42	9	1	1	25443	Gamma-glutamylcyclotransferase OS=Apis mellifera OX=7460 GN=LOC727004 PE=3 SV=1
A0A088A827	50.65	9	1	1	17551	Protein quiver OS=Apis mellifera OX=7460 PE=3 SV=1
A0A088A3W0	50.3	9	1	1	22304	Succinate dehydrogenase [ubiquinone] cytochrome b small subunit OS=Apis mellifera OX=7460 GN=LOC725566 PE=3 SV=1
A0A088A289	45.2	9	1	1	19124	Nuclear cap-binding protein subunit 2 OS=Apis mellifera OX=7460 GN=LOC413877 PE=3 SV=1
A0A088ADW1	43.02	9	1	1	25470	Uncharacterized protein OS=Apis mellifera OX=7460 GN=LOC552583 PE=4 SV=1
A0A088ACY6	41.27	9	1	1	22590	Uncharacterized protein OS=Apis mellifera OX=7460 GN=jagn PE=4 SV=1
A0A088AQN3	40.59	9	1	1	15496	U6 snRNA-associated Sm-like protein LSm1 OS=Apis mellifera OX=7460 GN=LOC552260 PE=3 SV=1
A0A088AE90	40.16	9	1	1	21976	Uncharacterized protein OS=Apis mellifera OX=7460 GN=LOC410857 PE=3 SV=1
A0A088AR29	39.68	9	1	1	24283	Uncharacterized protein OS=Apis mellifera OX=7460 GN=LOC552492 PE=3 SV=1
A0A088ACK1	35.23	9	1	1	11199	Small ubiquitin-related modifier OS=Apis mellifera OX=7460 GN=LOC409308 PE=3 SV=1
A0A088A893	34.66	9	1	1	17996	Uncharacterized protein OS=Apis mellifera OX=7460 PE=4 SV=1
A0A088AAQ6	34.49	9	1	1	13334	Uncharacterized protein OS=Apis mellifera OX=7460 GN=mRpS33 PE=4 SV=1
A0A088APQ8	34.25	9	1	1	23015	PRA1 family protein OS=Apis mellifera OX=7460 GN=107965354 PE=3 SV=1
A0A088A4M9	33.5	9	1	1	27127	Zinc finger Ran-binding domain-containing protein 2 OS=Apis mellifera OX=7460 GN=LOC409350 PE=3 SV=1
A0A088AF98	31.92	9	1	1	26487	Uncharacterized protein OS=Apis mellifera OX=7460 GN=LOC552847 PE=4 SV=1
A0A088A6E4	31.39	9	1	1	15405	Uncharacterized protein OS=Apis mellifera OX=7460 PE=4 SV=1
A0A088A4L9	29.48	9	1	1	19233	Uncharacterized protein OS=Apis mellifera OX=7460 PE=4 SV=1
A0A087ZX39	28.17	9	1	1	17936	D-aminoacyl-tRNA deacylase OS=Apis mellifera OX=7460 GN=100579024 PE=3 SV=1
A0A088A3X0	242.52	10	11	11	190969	Uncharacterized protein OS=Apis mellifera OX=7460 GN=LOC408552 PE=4 SV=1
A0A088ANE7	210.66	10	8	8	129878	Uncharacterized protein OS=Apis mellifera OX=7460 PE=4 SV=1
A0A088AB96	203.53	10	5	5	79564	Uncharacterized protein OS=Apis mellifera OX=7460 PE=3 SV=1
A0A087ZVV1	198.27	10	12	12	224508	Phosphoinositide phospholipase C OS=Apis mellifera OX=7460 PE=4 SV=1
A0A088A015	186.39	10	7	7	100380	Uncharacterized protein OS=Apis mellifera OX=7460 GN=LOC408851 PE=3 SV=1
A0A088A6Z0	180.1	10	5	5	94116	Uncharacterized protein OS=Apis mellifera OX=7460 GN=p115 PE=4 SV=1
A0A087ZSF4	176.09	10	9	9	144969	Uncharacterized protein OS=Apis mellifera OX=7460 GN=chb PE=4 SV=1
A0A088AG18	169.31	10	6	6	100100	Uncharacterized protein OS=Apis mellifera OX=7460 GN=Sap-r PE=4 SV=1
A0A088AQP4	167.33	10	4	2	55336	Uncharacterized protein OS=Apis mellifera OX=7460 PE=4 SV=1
A0A088AS84	162.39	10	13	13	211120	Uncharacterized protein OS=Apis mellifera OX=7460 PE=4 SV=1
A0A088ASG3	158.21	10	5	5	90599	Uncharacterized protein OS=Apis mellifera OX=7460 PE=4 SV=1
A0A088A2S3	151.23	10	5	5	88076	Uncharacterized protein OS=Apis mellifera OX=7460 GN=nito PE=4 SV=1
A0A088A2N6	149.89	10	5	5	96521	E3 ubiquitin-protein ligase OS=Apis mellifera OX=7460 GN=Nedd4 PE=4 SV=1
A0A087ZMS1	141.9	10	8	8	122424	Uncharacterized protein OS=Apis mellifera OX=7460 GN=emb PE=4 SV=1
A0A088AHX7	139.91	10	7	7	176228	Uncharacterized protein OS=Apis mellifera OX=7460 PE=4 SV=1
A0A088AGR3	138.05	10	5	5	83720	Uncharacterized protein OS=Apis mellifera OX=7460 PE=4 SV=1
A0A088A7J1	137.86	10	4	2	49067	Uncharacterized protein OS=Apis mellifera OX=7460 PE=3 SV=1
A0A088ADL7	135.66	10	4	4	53874	Uncharacterized protein OS=Apis mellifera OX=7460 GN=LOC408817 PE=3 SV=1
A0A088AQ38	132.17	10	4	4	74593	Uncharacterized protein OS=Apis mellifera OX=7460 GN=LOC726158 PE=4 SV=1
A0A087ZRG8	131.84	10	4	4	55107	V-type proton ATPase subunit a OS=Apis mellifera OX=7460 PE=3 SV=1
A0A088AD87	129.59	10	5	5	98312	Uncharacterized protein OS=Apis mellifera OX=7460 PE=4 SV=1
A0A088A2N7	128.23	10	4	4	84570	Uncharacterized protein OS=Apis mellifera OX=7460 PE=3 SV=1
A0A088ALH1	126.85	10	3	3	58421	Uncharacterized protein OS=Apis mellifera OX=7460 GN=LOC726679 PE=4 SV=1
A0A088AEJ8	125.87	10	3	3	53722	Uncharacterized protein OS=Apis mellifera OX=7460 GN=LOC412935 PE=4 SV=1
A0A088AN97	125.83	10	3	3	42970	Uncharacterized protein OS=Apis mellifera OX=7460 GN=LOC411533 PE=4 SV=1
A0A088ABX8	123.39	10	4	4	56769	Uncharacterized protein OS=Apis mellifera OX=7460 PE=4 SV=1
A0A087ZSA8	120.91	10	5	5	88160	Uncharacterized protein OS=Apis mellifera OX=7460 GN=LOC410570 PE=4 SV=1
A0A088AUI8	120.57	10	2	2	34059	Uncharacterized protein OS=Apis mellifera OX=7460 PE=4 SV=1
A0A088A118	119.51	10	4	4	71639	Uncharacterized protein OS=Apis mellifera OX=7460 GN=PPP4R2r PE=4 SV=1
A0A087ZXM2	117.57	10	2	2	30573	Uncharacterized protein OS=Apis mellifera OX=7460 PE=4 SV=1
Q25BT8	115.38	10	5	5	67357	Alpha-glucosidase OS=Apis mellifera OX=7460 GN=hbg1 PE=4 SV=1
A0A087ZYG3	109.98	10	3	3	56428	Uncharacterized protein OS=Apis mellifera OX=7460 GN=LOC411889 PE=4 SV=1
Q5F4H9	109.57	10	2	2	37537	Putative corticotropin releasing hormone-binding protein OS=Apis mellifera OX=7460 GN=crh-BP PE=2 SV=1
A0A087ZNY0	109.57	10	2	2	37466	Uncharacterized protein OS=Apis mellifera OX=7460 PE=4 SV=1
A0A087ZXD9	108.25	10	3	3	58578	Non-specific serine/threonine protein kinase OS=Apis mellifera OX=7460 GN=SNF1A PE=4 SV=1
A0A087ZW77	105.24	10	2	2	52715	Uncharacterized protein OS=Apis mellifera OX=7460 GN=LOC552459 PE=4 SV=1
A0A088A9V3	105.03	10	4	4	65402	Uncharacterized protein OS=Apis mellifera OX=7460 GN=LOC408910 PE=4 SV=1
A0A087ZV42	104.14	10	5	5	74016	Uncharacterized protein OS=Apis mellifera OX=7460 PE=3 SV=1
A0A088ARX8	102.5	10	3	3	44805	Uncharacterized protein OS=Apis mellifera OX=7460 GN=LOC552006 PE=4 SV=1
A0A087ZYR0	102.03	10	2	2	55066	Uncharacterized protein OS=Apis mellifera OX=7460 PE=4 SV=1
A0A088ACF3	101.87	10	2	2	37022	Delta-aminolevulinic acid dehydratase OS=Apis mellifera OX=7460 GN=Pbgs PE=3 SV=1
A0A087ZP50	100.68	10	3	3	55654	Uncharacterized protein OS=Apis mellifera OX=7460 GN=LOC551780 PE=4 SV=1
A0A087ZS18	100.33	10	2	2	49080	Uncharacterized protein OS=Apis mellifera OX=7460 GN=Bap55 PE=3 SV=1
A0A088AJ83	98.31	10	4	4	51556	Uncharacterized protein OS=Apis mellifera OX=7460 GN=LOC409062 PE=4 SV=1
A0A088AFE4	92.58	10	3	3	40301	Uncharacterized protein OS=Apis mellifera OX=7460 GN=Csnk1a1 PE=3 SV=1
A0A088A787	86.47	10	2	2	35753	Uncharacterized protein OS=Apis mellifera OX=7460 PE=3 SV=1
H9K170	86.07	10	1	1	15932	60S ribosomal protein L32 OS=Apis mellifera OX=7460 GN=RpL32 PE=4 SV=1
A0A088A9Y6	85.65	10	1	1	20432	Uncharacterized protein OS=Apis mellifera OX=7460 GN=100579055 PE=4 SV=1
A0A087ZXD3	84.59	10	2	2	36884	Uncharacterized protein OS=Apis mellifera OX=7460 GN=LOC410487 PE=4 SV=1
A0A087ZN44	84.07	10	3	3	46811	Carboxypeptidase OS=Apis mellifera OX=7460 PE=3 SV=1
A0A088AQN0	81.06	10	3	3	52168	Uncharacterized protein OS=Apis mellifera OX=7460 PE=4 SV=1
A0A087ZYS5	79.86	10	2	2	42940	Uncharacterized protein OS=Apis mellifera OX=7460 GN=LOC725703 PE=4 SV=1
A0A0B4J2M4	79.31	10	2	2	44505	N-acetylglucosamine-6-phosphate deacetylase OS=Apis mellifera OX=7460 PE=3 SV=1
A0A088AH01	76.89	10	1	1	23844	Uncharacterized protein OS=Apis mellifera OX=7460 GN=LOC410897 PE=4 SV=1
A0A087ZWB2	74.88	10	2	2	23631	Proteasome subunit beta OS=Apis mellifera OX=7460 GN=LOC409978 PE=3 SV=1
A0A087ZVA0	74.87	10	1	1	17061	Uncharacterized protein OS=Apis mellifera OX=7460 GN=LOC725076 PE=4 SV=1
A0A088AC16	73.88	10	1	1	19434	Uncharacterized protein OS=Apis mellifera OX=7460 GN=LOC408608 PE=4 SV=1
A0A088A5C5	73.57	10	1	1	15265	Uncharacterized protein OS=Apis mellifera OX=7460 GN=LOC724680 PE=4 SV=1
A0A088AKM4	72.91	10	2	2	33735	Uncharacterized protein OS=Apis mellifera OX=7460 GN=CREG PE=4 SV=1
A0A088AS00	72.37	10	1	1	22439	1 2-dihydroxy-3-keto-5-methylthiopentene dioxygenase OS=Apis mellifera OX=7460 GN=LOC551839 PE=3 SV=1
A0A087ZRK7	72.08	10	3	3	75347	Uncharacterized protein OS=Apis mellifera OX=7460 PE=4 SV=1
A0A088AEN1	70.58	10	1	1	22542	Uncharacterized protein OS=Apis mellifera OX=7460 PE=4 SV=1
A0A087ZVV3	67.62	10	1	1	16591	Uncharacterized protein OS=Apis mellifera OX=7460 GN=LOC725961 PE=4 SV=1
A0A088A5I9	65.84	10	1	1	16938	Uncharacterized protein OS=Apis mellifera OX=7460 GN=eIF-1A PE=3 SV=1
A0A088ASJ1	65.77	10	2	2	26315	Uncharacterized protein OS=Apis mellifera OX=7460 PE=4 SV=1
A0A087ZP95	64.02	10	1	1	20661	Uncharacterized protein OS=Apis mellifera OX=7460 GN=CPR6 PE=4 SV=1
Q1W636	63.39	10	1	1	15000	OBP18 OS=Apis mellifera OX=7460 PE=2 SV=1
A0A087ZSR8	63.21	10	2	2	32632	Uncharacterized protein OS=Apis mellifera OX=7460 GN=LOC408966 PE=4 SV=1
A0A087ZW69	63.02	10	1	1	26081	Uncharacterized protein OS=Apis mellifera OX=7460 GN=loj PE=3 SV=1
A0A088AJF4	61.31	10	1	1	20295	Uncharacterized protein OS=Apis mellifera OX=7460 GN=UbcD2 PE=3 SV=1
A0A088AV16	61.23	10	2	2	37193	Uncharacterized protein OS=Apis mellifera OX=7460 GN=LOC552562 PE=4 SV=1
A0A088AER8	60.09	10	2	2	53494	Uncharacterized protein OS=Apis mellifera OX=7460 GN=LOC410577 PE=4 SV=1
A0A087ZYB2	58	10	1	1	34372	Nucleoporin NUP53 OS=Apis mellifera OX=7460 PE=3 SV=1
A0A088AUN1	57.17	10	2	2	51554	Uncharacterized protein OS=Apis mellifera OX=7460 PE=4 SV=1
A0A088AR66	53.83	10	2	2	30079	Uncharacterized protein OS=Apis mellifera OX=7460 GN=LOC410518 PE=4 SV=1
A0A087ZQ25	52.58	10	2	2	38112	Uncharacterized protein OS=Apis mellifera OX=7460 PE=3 SV=1
A0A087ZS23	52.53	10	2	2	51103	Uncharacterized protein OS=Apis mellifera OX=7460 GN=ced-6 PE=4 SV=1
A0A088AJI7	50.89	10	2	2	32461	Geranylgeranyl transferase type-2 subunit beta OS=Apis mellifera OX=7460 PE=3 SV=1
A0A087ZU55	48.7	10	2	2	51259	Uncharacterized protein OS=Apis mellifera OX=7460 PE=4 SV=1
A0A088ALK3	47.59	10	1	1	13943	Mitochondrial pyruvate carrier OS=Apis mellifera OX=7460 GN=LOC413186 PE=3 SV=1
A0A087ZZV1	42.43	10	1	1	21737	5-demethoxyubiquinone hydroxylase mitochondrial OS=Apis mellifera OX=7460 GN=Coq7 PE=3 SV=1
Q1W633	40.6	10	1	1	15204	OBP21 OS=Apis mellifera OX=7460 GN=Obp21 PE=2 SV=1
A0A088A0A8	40.27	10	2	2	29643	Uncharacterized protein OS=Apis mellifera OX=7460 GN=LOC408847 PE=4 SV=1
A0A087ZU00	38.65	10	1	1	18715	Uncharacterized protein OS=Apis mellifera OX=7460 GN=102654257 PE=4 SV=1
A0A087ZPG7	35.08	10	1	1	13475	Uncharacterized protein OS=Apis mellifera OX=7460 PE=4 SV=1
A0A088A2B1	32.2	10	1	1	12048	Uncharacterized protein OS=Apis mellifera OX=7460 GN=LOC727306 PE=3 SV=1
A0A088AEL4	31.21	10	1	1	32610	Uncharacterized protein OS=Apis mellifera OX=7460 GN=SpdS PE=3 SV=1
A0A087ZZ63	29.66	10	1	1	11154	Uncharacterized protein OS=Apis mellifera OX=7460 GN=LOC408918 PE=4 SV=1
A0A087ZSR1	27.8	10	1	1	17590	Peroxiredoxin OS=Apis mellifera OX=7460 PE=3 SV=1
A0A088A1D7	27.73	10	1	1	24592	Uncharacterized protein OS=Apis mellifera OX=7460 GN=LOC726896 PE=4 SV=1
A0A088ARC4	27.34	10	1	1	40265	Uncharacterized protein OS=Apis mellifera OX=7460 GN=LOC726922 PE=4 SV=1
A0A087ZVJ6	26.07	10	1	1	15356	Uncharacterized protein OS=Apis mellifera OX=7460 PE=4 SV=1
A0A088AIQ7	219.51	11	17	17	306727	Uncharacterized protein OS=Apis mellifera OX=7460 PE=4 SV=1
A0A088AQI7	202.84	11	13	13	238900	Uncharacterized protein OS=Apis mellifera OX=7460 PE=4 SV=1
A0A088AN52	192.6	11	5	5	75659	Lipase maturation factor OS=Apis mellifera OX=7460 GN=LOC724741 PE=3 SV=1
A0A088A3B9	183.98	11	7	7	109541	Uncharacterized protein OS=Apis mellifera OX=7460 GN=LOC413796 PE=3 SV=1
A0A088A0M9	182.02	11	8	8	145435	Uncharacterized protein OS=Apis mellifera OX=7460 PE=4 SV=1
A0A088A2C4	165.65	11	9	9	114107	Uncharacterized protein OS=Apis mellifera OX=7460 PE=4 SV=1
A0A088A8A2	159.39	11	6	6	98353	Uncharacterized protein OS=Apis mellifera OX=7460 PE=4 SV=1
A0A088ABZ7	155.82	11	7	7	117862	Uncharacterized protein OS=Apis mellifera OX=7460 PE=4 SV=1
A0A087ZRX1	152.7	11	5	5	100145	Uncharacterized protein OS=Apis mellifera OX=7460 GN=410078 PE=4 SV=1
A0A088AS59	146.3	11	6	4	82251	Uncharacterized protein OS=Apis mellifera OX=7460 GN=LOC411250 PE=3 SV=1
A0A088AKD7	143.91	11	6	6	88556	Uncharacterized protein OS=Apis mellifera OX=7460 GN=Nep2 PE=4 SV=1
A0A088A894	140.78	11	3	3	69756	Tyrosine-protein phosphatase non-receptor type OS=Apis mellifera OX=7460 GN=csw PE=3 SV=1
A0A087ZYP9	140.52	11	6	6	81838	Uncharacterized protein OS=Apis mellifera OX=7460 GN=Ddx1 PE=4 SV=1
A0A088A2I0	139.66	11	4	4	51797	Uncharacterized protein OS=Apis mellifera OX=7460 PE=4 SV=1
A0A087ZR95	139.4	11	6	6	89185	Uncharacterized protein OS=Apis mellifera OX=7460 GN=Aats-gln PE=3 SV=1
A0A088A9H8	137.24	11	7	7	72682	Uncharacterized protein OS=Apis mellifera OX=7460 GN=727399 PE=4 SV=1
A0A088AUT8	136.99	11	4	4	77247	Trehalase OS=Apis mellifera OX=7460 GN=LOC410795 PE=3 SV=1
A8J4S9	136.99	11	4	4	72817	Trehalase OS=Apis mellifera OX=7460 PE=1 SV=1
A0A088AN42	134.73	11	3	3	40929	Uncharacterized protein OS=Apis mellifera OX=7460 GN=LOC411633 PE=3 SV=1
A0A087ZPW3	133.78	11	4	4	49793	Uncharacterized protein OS=Apis mellifera OX=7460 GN=Syt4 PE=4 SV=1
A0A088AEQ2	133.28	11	6	6	94747	Uncharacterized protein OS=Apis mellifera OX=7460 PE=4 SV=1
A0A087ZVQ0	129.66	11	4	4	68720	Uncharacterized protein OS=Apis mellifera OX=7460 GN=car PE=3 SV=1
A0A088AR84	129.62	11	4	4	66258	Signal recognition particle subunit SRP68 OS=Apis mellifera OX=7460 GN=Srp68 PE=3 SV=1
A0A088A8P3	128.94	11	5	5	63307	Alkylglycerone-phosphate synthase OS=Apis mellifera OX=7460 PE=3 SV=1
A0A088AV10	127.56	11	4	4	57180	Uncharacterized protein OS=Apis mellifera OX=7460 GN=LOC726589 PE=4 SV=1
D9MWM7	126.57	11	3	3	59185	Fatty acyl-CoA reductase OS=Apis mellifera OX=7460 GN=FAR1 PE=2 SV=1
A0A088A9W4	121.09	11	3	1	34750	Uncharacterized protein OS=Apis mellifera OX=7460 GN=Flo1 PE=3 SV=1
A0A088ARL5	118.62	11	3	3	50002	Uncharacterized protein OS=Apis mellifera OX=7460 PE=4 SV=1
A0A088AA85	116.68	11	3	3	38455	Uncharacterized protein OS=Apis mellifera OX=7460 PE=4 SV=1
A0A088AU60	115.59	11	4	4	52285	Uncharacterized protein OS=Apis mellifera OX=7460 GN=snRNP70K PE=4 SV=1
A0A088A1B8	114.96	11	5	5	93876	Nuclear pore protein OS=Apis mellifera OX=7460 GN=LOC410343 PE=3 SV=1
A0A088A5R3	108.2	11	3	3	25034	Uncharacterized protein OS=Apis mellifera OX=7460 GN=Rab21 PE=4 SV=1
A0A087ZZY4	106.71	11	2	2	27438	Uncharacterized protein OS=Apis mellifera OX=7460 PE=4 SV=1
A0A087ZZ10	105.13	11	2	2	33620	Uncharacterized protein OS=Apis mellifera OX=7460 GN=eIF2B-alpha PE=3 SV=1
A0A087ZY90	104.74	11	3	3	46435	Uncharacterized protein OS=Apis mellifera OX=7460 GN=LOC413006 PE=4 SV=1
A0A088AP92	103.9	11	3	3	56124	Histone deacetylase OS=Apis mellifera OX=7460 GN=HDAC1 PE=3 SV=1
A0A088A344	102.07	11	3	3	70393	Uncharacterized protein OS=Apis mellifera OX=7460 PE=4 SV=1
A0A088AH78	101.78	11	3	3	45977	Uncharacterized protein OS=Apis mellifera OX=7460 GN=Vps36 PE=4 SV=1
A0A088AFW6	101.61	11	2	2	28290	Uncharacterized protein OS=Apis mellifera OX=7460 PE=4 SV=1
A0A088A2E5	100.01	11	2	2	31249	Uncharacterized protein OS=Apis mellifera OX=7460 GN=LOC412366 PE=4 SV=1
A0A088A330	99.73	11	1	1	25792	Uncharacterized protein OS=Apis mellifera OX=7460 GN=LOC552786 PE=3 SV=1
A0A088AU55	98.37	11	2	2	29013	Uncharacterized protein OS=Apis mellifera OX=7460 PE=4 SV=1
A0A088A8P7	97.16	11	2	2	22555	Uncharacterized protein OS=Apis mellifera OX=7460 GN=413835 PE=4 SV=1
A0A088ABW1	97.11	11	2	2	30230	Uncharacterized protein OS=Apis mellifera OX=7460 PE=4 SV=1
A0A088A861	96.9	11	2	2	27404	Eukaryotic translation initiation factor 3 subunit J OS=Apis mellifera OX=7460 GN=Adam PE=3 SV=1
A0A088A100	96.57	11	2	2	38259	Uncharacterized protein OS=Apis mellifera OX=7460 GN=LOC551146 PE=4 SV=1
A0A087ZNI5	93.32	11	2	2	38416	ATP-dependent (S)-NAD(P)H-hydrate dehydratase OS=Apis mellifera OX=7460 PE=3 SV=1
A0A088AQR4	93.26	11	2	2	26760	Uncharacterized protein OS=Apis mellifera OX=7460 PE=4 SV=1
A0A087ZTX1	91.83	11	3	3	42060	Uncharacterized protein OS=Apis mellifera OX=7460 GN=LOC551931 PE=4 SV=1
A0A087ZRN3	90.63	11	2	2	31688	Uncharacterized protein OS=Apis mellifera OX=7460 GN=LOC412666 PE=4 SV=1
A0A088ARK6	88.09	11	2	2	36601	Purine nucleoside phosphorylase OS=Apis mellifera OX=7460 GN=LOC408299 PE=3 SV=1
H9JZY2	87.11	11	2	2	14336	Uncharacterized protein OS=Apis mellifera OX=7460 GN=LOC725881 PE=4 SV=1
A0A087ZR45	86.64	11	3	3	85696	Uncharacterized protein OS=Apis mellifera OX=7460 PE=4 SV=1
A0A087ZNA9	83.86	11	3	3	49503	Uncharacterized protein OS=Apis mellifera OX=7460 GN=Aats-ser PE=4 SV=1
A0A088A2S7	83.61	11	2	2	36761	Uncharacterized protein OS=Apis mellifera OX=7460 GN=LOC552089 PE=4 SV=1
A0A088ATX9	78.24	11	3	3	62439	Uncharacterized protein OS=Apis mellifera OX=7460 PE=4 SV=1
A0A087ZR57	76.69	11	1	1	19128	Uncharacterized protein OS=Apis mellifera OX=7460 PE=4 SV=1
A0A087ZR68	73.04	11	1	1	18468	Uncharacterized protein OS=Apis mellifera OX=7460 PE=4 SV=1
A0A087ZVW6	71.02	11	1	1	23649	Uncharacterized protein OS=Apis mellifera OX=7460 GN=fh PE=4 SV=1
A0A087ZWB6	67.95	11	3	3	52296	Uncharacterized protein OS=Apis mellifera OX=7460 PE=4 SV=1
A0A088AMH7	64.99	11	1	1	25836	Methionine aminopeptidase OS=Apis mellifera OX=7460 GN=LOC724879 PE=3 SV=1
A0A087ZNY9	63.93	11	1	1	14451	Uncharacterized protein OS=Apis mellifera OX=7460 GN=RpL35 PE=3 SV=1
A0A087ZTM2	63.83	11	1	1	21068	Uncharacterized protein OS=Apis mellifera OX=7460 GN=Ard1 PE=4 SV=1
A0A088ADQ8	63.26	11	1	1	17216	Uncharacterized protein OS=Apis mellifera OX=7460 GN=UbcD6 PE=3 SV=1
A0A088AJ29	62.88	11	2	2	29822	Uncharacterized protein OS=Apis mellifera OX=7460 GN=LOC551633 PE=4 SV=1
A0A088AW16	60.31	11	1	1	12972	Uncharacterized protein OS=Apis mellifera OX=7460 PE=4 SV=1
A0A088AJ35	59.88	11	1	1	18978	Uncharacterized protein OS=Apis mellifera OX=7460 GN=mRpS17 PE=4 SV=1
A0A088AEU9	57.07	11	1	1	17315	Uncharacterized protein OS=Apis mellifera OX=7460 PE=4 SV=1
A0A088AUA4	56.88	11	2	2	43372	Uncharacterized protein OS=Apis mellifera OX=7460 GN=LOC552091 PE=4 SV=1
A0A087ZVI9	56.5	11	1	1	26313	ATP-dependent Clp protease proteolytic subunit OS=Apis mellifera OX=7460 GN=LOC409011 PE=3 SV=1
A0A088AEY6	56.42	11	1	1	18092	Uncharacterized protein OS=Apis mellifera OX=7460 GN=100578218 PE=4 SV=1
A0A0S2LSJ8	49.93	11	1	1	14047	NADH-ubiquinone oxidoreductase chain 3 OS=Apis mellifera OX=7460 GN=ND3 PE=3 SV=1
A0A291LR96	49.93	11	1	1	13965	NADH-ubiquinone oxidoreductase chain 3 OS=Apis mellifera OX=7460 GN=ND3 PE=3 SV=1
A0A347ZMV1	49.93	11	1	1	14036	NADH-ubiquinone oxidoreductase chain 3 OS=Apis mellifera OX=7460 GN=ND3 PE=3 SV=1
A0A088A0M6	49.25	11	2	2	30020	Uncharacterized protein OS=Apis mellifera OX=7460 GN=727390 PE=4 SV=1
A0A087ZR44	48.7	11	2	2	36536	Uncharacterized protein OS=Apis mellifera OX=7460 PE=4 SV=1
A0A088AW61	48.48	11	1	1	16744	Uncharacterized protein OS=Apis mellifera OX=7460 PE=4 SV=1
A0A088AF07	46.52	11	1	1	20164	Uncharacterized protein OS=Apis mellifera OX=7460 GN=LOC408522 PE=3 SV=1
A0A088A340	46.15	11	1	1	9646	Peptidylprolyl isomerase OS=Apis mellifera OX=7460 PE=4 SV=1
A0A087ZR60	43.81	11	1	1	14344	COX assembly mitochondrial protein OS=Apis mellifera OX=7460 GN=LOC552802 PE=3 SV=1
A0A088AES0	43.75	11	1	1	17057	Uncharacterized protein OS=Apis mellifera OX=7460 GN=Trappc1 PE=4 SV=1
A0A088AA28	42.7	11	1	1	10652	Uncharacterized protein OS=Apis mellifera OX=7460 PE=4 SV=1
A0A088ANN6	37.53	11	1	1	24565	Uncharacterized protein OS=Apis mellifera OX=7460 GN=LOC724720 PE=4 SV=1
A0A088AKH9	33.74	11	1	1	10114	Uncharacterized protein OS=Apis mellifera OX=7460 GN=725086 PE=4 SV=1
A0A088AU84	33.4	11	1	1	12879	Uncharacterized protein OS=Apis mellifera OX=7460 PE=4 SV=1
A0A087ZUF0	27.76	11	1	1	18488	Uncharacterized protein OS=Apis mellifera OX=7460 PE=4 SV=1
A0A088A5Z8	259.03	12	21	21	294823	Ubiquitin carboxyl-terminal hydrolase OS=Apis mellifera OX=7460 GN=faf PE=3 SV=1
A0A088A932	250.41	12	16	16	239898	Uncharacterized protein OS=Apis mellifera OX=7460 PE=3 SV=1
A0A087ZND5	230.65	12	20	20	201210	Uncharacterized protein OS=Apis mellifera OX=7460 PE=4 SV=1
A0A088A461	198.2	12	7	7	102618	Transient receptor potential cation channel protein painless OS=Apis mellifera OX=7460 GN=Pain PE=2 SV=1
A0A088AM29	175.78	12	8	8	65179	Uncharacterized protein OS=Apis mellifera OX=7460 GN=LOC552734 PE=4 SV=1
A0A088AT46	175.13	12	5	5	70629	Uncharacterized protein OS=Apis mellifera OX=7460 GN=LOC410752 PE=4 SV=1
A0A088AR59	173.9	12	6	6	91188	Hepatocyte growth factor-regulated tyrosine kinase substrate OS=Apis mellifera OX=7460 GN=Hrs PE=4 SV=1
A0A088ABF5	169.28	12	5	5	62294	Uncharacterized protein OS=Apis mellifera OX=7460 GN=LOC410189 PE=4 SV=1
A0A087ZR09	161.27	12	5	5	68433	Uncharacterized protein OS=Apis mellifera OX=7460 GN=pix PE=4 SV=1
A0A087ZZR8	161.26	12	11	11	126217	Uncharacterized protein OS=Apis mellifera OX=7460 PE=4 SV=1
P85799	150.98	12	3	3	40985	Prohormone-2 OS=Apis mellifera OX=7460 PE=1 SV=1
A0A088AEG7	150.74	12	4	4	89411	Uncharacterized protein OS=Apis mellifera OX=7460 GN=gprs PE=4 SV=1
A0A088A1R3	143.69	12	3	3	27879	Uncharacterized protein OS=Apis mellifera OX=7460 PE=4 SV=1
A0A087ZY03	142.59	12	6	6	67142	Uncharacterized protein OS=Apis mellifera OX=7460 PE=4 SV=1
A0A087ZRK6	140.51	12	6	6	66620	Uncharacterized protein OS=Apis mellifera OX=7460 PE=4 SV=1
A0A088A152	140.02	12	4	4	65986	Uncharacterized protein OS=Apis mellifera OX=7460 GN=Elf PE=4 SV=1
A0A088A1L3	139.68	12	4	4	49211	Uncharacterized protein OS=Apis mellifera OX=7460 GN=LOC408349 PE=3 SV=1
A0A087ZMY1	138.55	12	5	5	65654	Uncharacterized protein OS=Apis mellifera OX=7460 GN=LOC726040 PE=4 SV=1
Q3B708	136.9	12	3	3	25400	Troponin I isoform 6a1 OS=Apis mellifera OX=7460 GN=TpnI PE=4 SV=1
A0A088AUJ3	133.68	12	5	5	61106	Uncharacterized protein OS=Apis mellifera OX=7460 GN=LOC552073 PE=4 SV=1
A0A087ZY55	132.97	12	4	4	54530	Uncharacterized protein OS=Apis mellifera OX=7460 GN=LOC409065 PE=4 SV=1
A0A088AA01	130.47	12	4	4	49356	Uncharacterized protein OS=Apis mellifera OX=7460 GN=Trx1-like3 PE=4 SV=1
A0A087ZVE8	129.21	12	5	5	51990	Epoxide hydrolase OS=Apis mellifera OX=7460 GN=LOC406152 PE=3 SV=1
A0A088A464	123.15	12	4	4	58484	Uncharacterized protein OS=Apis mellifera OX=7460 GN=LOC410054 PE=4 SV=1
A0A088ACK3	122.45	12	4	4	77915	Uncharacterized protein OS=Apis mellifera OX=7460 PE=4 SV=1
A0A088AES6	121.86	12	4	4	55029	Uncharacterized protein OS=Apis mellifera OX=7460 PE=4 SV=1
A0A087ZSW3	119.52	12	3	3	33142	Uncharacterized protein OS=Apis mellifera OX=7460 GN=726314 PE=4 SV=1
A0A088AHX9	117.62	12	3	3	41713	Uncharacterized protein OS=Apis mellifera OX=7460 GN=102656107 PE=4 SV=1
A0A088AIL4	114.73	12	4	4	71334	Uncharacterized protein OS=Apis mellifera OX=7460 PE=4 SV=1
A0A087ZRM7	114.49	12	2	2	23504	Clathrin light chain OS=Apis mellifera OX=7460 GN=Clc PE=3 SV=1
A0A087ZMS7	111.13	12	2	1	24675	Uncharacterized protein OS=Apis mellifera OX=7460 GN=Rab39 PE=4 SV=1
A0A088AJI8	106.37	12	3	3	28279	Uncharacterized protein OS=Apis mellifera OX=7460 GN=shu PE=4 SV=1
A0A088AHJ4	105.9	12	3	3	65267	Uncharacterized protein OS=Apis mellifera OX=7460 PE=4 SV=1
A0A088A098	105.33	12	3	3	56050	Uncharacterized protein OS=Apis mellifera OX=7460 GN=PpD3 PE=4 SV=1
A0A087ZZF5	104.07	12	2	2	34129	Uncharacterized protein OS=Apis mellifera OX=7460 PE=3 SV=1
A0A088A9L4	102.88	12	4	4	44477	Eukaryotic translation initiation factor 3 subunit M OS=Apis mellifera OX=7460 GN=Tango7 PE=3 SV=1
A0A088A6M3	102.45	12	2	2	33461	Uncharacterized protein OS=Apis mellifera OX=7460 PE=4 SV=1
A0A088A9C2	101.56	12	4	4	50580	Uncharacterized protein OS=Apis mellifera OX=7460 GN=LOC413354 PE=4 SV=1
A0A088A4R3	100.72	12	2	2	25597	Uncharacterized protein OS=Apis mellifera OX=7460 PE=3 SV=1
A0A088ALS1	100.7	12	3	3	39109	Uroporphyrinogen decarboxylase OS=Apis mellifera OX=7460 PE=3 SV=1
A0A088ADL4	100.04	12	3	3	52725	Uncharacterized protein OS=Apis mellifera OX=7460 PE=4 SV=1
A0A087ZV19	96.01	12	4	4	46928	Uncharacterized protein OS=Apis mellifera OX=7460 GN=La PE=4 SV=1
H9KTC9	95.63	12	1	1	18842	Uncharacterized protein OS=Apis mellifera OX=7460 PE=4 SV=1
A0A087ZSX5	95.59	12	3	3	35754	Uncharacterized protein OS=Apis mellifera OX=7460 PE=4 SV=1
A0A088AIY2	93.37	12	2	2	17264	Uncharacterized protein OS=Apis mellifera OX=7460 GN=mago PE=4 SV=1
A0A088A2F5	91.78	12	3	3	52390	Uncharacterized protein OS=Apis mellifera OX=7460 GN=100578161 PE=4 SV=1
A0A088A0N3	91.2	12	2	2	20538	Uncharacterized protein OS=Apis mellifera OX=7460 GN=LOC412201 PE=4 SV=1
A0A088A2C3	90.49	12	3	3	36222	SURF1-like protein OS=Apis mellifera OX=7460 GN=Surf1 PE=3 SV=1
A0A088AF14	89.13	12	3	3	43437	Dihydroorotate dehydrogenase (quinone) mitochondrial OS=Apis mellifera OX=7460 GN=100577081 PE=3 SV=1
A0A088AVS3	88.48	12	2	2	35754	Uncharacterized protein OS=Apis mellifera OX=7460 GN=LOC413314 PE=4 SV=1
A0A088AWA1	86.92	12	3	3	46061	Uncharacterized protein OS=Apis mellifera OX=7460 GN=LOC724498 PE=4 SV=1
A0A087ZR59	84.08	12	5	5	58569	Uncharacterized protein OS=Apis mellifera OX=7460 GN=LOC413805 PE=4 SV=1
A0A087ZSF3	81.7	12	2	2	27032	Uncharacterized protein OS=Apis mellifera OX=7460 PE=4 SV=1
A0A087ZRM4	81.63	12	1	1	16935	Uncharacterized protein OS=Apis mellifera OX=7460 PE=4 SV=1
A0A087ZWI1	77.75	12	1	1	19991	Uncharacterized protein OS=Apis mellifera OX=7460 GN=Dctn5 PE=4 SV=1
A0A088AQS0	76.78	12	2	2	24891	Uncharacterized protein OS=Apis mellifera OX=7460 PE=4 SV=1
A0A088AGP9	72.97	12	2	2	21431	Inosine triphosphate pyrophosphatase OS=Apis mellifera OX=7460 GN=LOC726205 PE=3 SV=1
A0A088AS20	71.58	12	2	2	30670	Uncharacterized protein OS=Apis mellifera OX=7460 PE=4 SV=1
A0A088ADR9	71.19	12	1	1	19668	Uncharacterized protein OS=Apis mellifera OX=7460 PE=4 SV=1
I1Z8F4	70.11	12	2	2	33424	Transformer 2 transcript variant 284 OS=Apis mellifera OX=7460 GN=tra2 PE=2 SV=1
I1Z8F1	70.11	12	2	2	33511	Transformer 2 transcript variant 285 OS=Apis mellifera OX=7460 GN=tra2 PE=2 SV=1
A0A087ZXC8	69.06	12	1	1	13575	Uncharacterized protein OS=Apis mellifera OX=7460 PE=4 SV=1
A0A088ADU4	66.86	12	2	2	40873	Alpha-tubulin N-acetyltransferase OS=Apis mellifera OX=7460 GN=726664 PE=3 SV=1
A0A088ASR9	64.96	12	1	1	17794	Uncharacterized protein OS=Apis mellifera OX=7460 GN=LOC726696 PE=4 SV=1
A0A088ANJ4	64.04	12	2	2	27985	Uncharacterized protein OS=Apis mellifera OX=7460 GN=RPA2 PE=4 SV=1
A0A088AFK3	63.23	12	1	1	27111	Peptide deformylase OS=Apis mellifera OX=7460 GN=102654737 PE=3 SV=1
A0A088A001	62.06	12	2	2	28253	Uncharacterized protein OS=Apis mellifera OX=7460 GN=LOC726139 PE=4 SV=1
A0A088A337	58.75	12	3	3	43834	Uncharacterized protein OS=Apis mellifera OX=7460 GN=LOC552611 PE=4 SV=1
Q7YU97	58.12	12	1	1	15971	V-type proton ATPase proteolipid subunit OS=Apis mellifera OX=7460 GN=vha16 PE=2 SV=1
A0A088A1F9	52.03	12	1	1	13832	Uncharacterized protein OS=Apis mellifera OX=7460 PE=4 SV=1
A0A087ZNF8	49.49	12	2	2	25501	Uncharacterized protein OS=Apis mellifera OX=7460 GN=LOC552600 PE=4 SV=1
A0A088AW65	46.62	12	2	2	25451	Uncharacterized protein OS=Apis mellifera OX=7460 GN=Rab-RP4 PE=4 SV=1
A0A088AIJ0	44.57	12	1	1	18396	Uncharacterized protein OS=Apis mellifera OX=7460 PE=4 SV=1
A0A087ZRM2	40.11	12	1	1	15782	Ubiquitin-like protein OS=Apis mellifera OX=7460 PE=4 SV=1
A0A087ZUI1	39.6	12	1	1	12984	Uncharacterized protein OS=Apis mellifera OX=7460 PE=4 SV=1
A0A088AF01	34.57	12	1	1	8557	Small nuclear ribonucleoprotein G OS=Apis mellifera OX=7460 GN=SmG PE=3 SV=1
A0A088AG71	33.32	12	1	1	15811	Uncharacterized protein OS=Apis mellifera OX=7460 GN=100577527 PE=4 SV=1
A0A087ZSD9	30.85	12	1	1	17423	Uncharacterized protein OS=Apis mellifera OX=7460 PE=4 SV=1
A0A088AU03	30.11	12	1	1	13529	Uncharacterized protein OS=Apis mellifera OX=7460 PE=4 SV=1
A0A087ZUN6	26.19	12	1	1	10193	Uncharacterized protein OS=Apis mellifera OX=7460 PE=4 SV=1
A0A088AEP0	281.05	13	27	27	389627	Uncharacterized protein OS=Apis mellifera OX=7460 PE=4 SV=1
A0A087ZW75	277.11	13	12	12	156552	Uncharacterized protein OS=Apis mellifera OX=7460 PE=4 SV=1
A0A088AJT3	258.76	13	6	6	50844	Uncharacterized protein OS=Apis mellifera OX=7460 PE=4 SV=1
A0A088AEZ4	215.97	13	4	1	49865	Tubulin alpha chain OS=Apis mellifera OX=7460 GN=LOC552766 PE=3 SV=1
A0A088AUK8	212	13	10	10	88569	Uncharacterized protein OS=Apis mellifera OX=7460 PE=4 SV=1
A0A088ATJ3	203.19	13	19	19	214284	Uncharacterized protein OS=Apis mellifera OX=7460 PE=4 SV=1
A0A088AKA8	202.25	13	6	6	62309	Uncharacterized protein OS=Apis mellifera OX=7460 PE=3 SV=1
A0A087ZZ67	199.79	13	10	10	140134	Uncharacterized protein OS=Apis mellifera OX=7460 GN=LOC725169 PE=4 SV=1
A0A088A179	190.93	13	6	6	105172	Uncharacterized protein OS=Apis mellifera OX=7460 PE=4 SV=1
A0A088A013	189.28	13	2	2	17210	Uncharacterized protein OS=Apis mellifera OX=7460 GN=LOC726337 PE=4 SV=1
A0A088AI22	186.75	13	6	6	76075	Uncharacterized protein OS=Apis mellifera OX=7460 PE=4 SV=1
A0A088AVI9	184.04	13	12	12	141858	Uncharacterized protein OS=Apis mellifera OX=7460 GN=rdgB PE=4 SV=1
A0A088A093	171.87	13	8	8	95611	Uncharacterized protein OS=Apis mellifera OX=7460 PE=4 SV=1
A0A088AK62	170.34	13	4	4	54906	Fibroblast growth factor OS=Apis mellifera OX=7460 PE=3 SV=1
A0A088AP31	169.87	13	4	4	60535	Uncharacterized protein OS=Apis mellifera OX=7460 GN=Con PE=4 SV=1
A0A088AJR6	155.41	13	5	5	52947	Uncharacterized protein OS=Apis mellifera OX=7460 GN=LOC410149 PE=4 SV=1
Q5UAF0	154.94	13	5	5	68305	Soluble guanylyl cyclase beta 1 subunit OS=Apis mellifera OX=7460 GN=Gycbeta1 PE=2 SV=1
Q6L5L6	154.94	13	5	5	68273	Soluble guanylyl cyclase beta 1 subunit OS=Apis mellifera OX=7460 GN=AmsGC beta-1 PE=2 SV=1
A0A087ZQD2	142.88	13	4	4	52807	Uncharacterized protein OS=Apis mellifera OX=7460 PE=3 SV=1
A0A0B5EEN9	142.88	13	4	4	53457	Gamma-aminobutyric acid receptor RDL subunit OS=Apis mellifera OX=7460 GN=RDL PE=2 SV=1
A0A088AW09	139.65	13	5	5	85198	Uncharacterized protein OS=Apis mellifera OX=7460 PE=3 SV=1
A0A088A122	137.12	13	5	5	67929	Uncharacterized protein OS=Apis mellifera OX=7460 GN=Madm PE=4 SV=1
A0A088AJN6	136.06	13	6	6	76917	Beta-glucuronidase OS=Apis mellifera OX=7460 GN=LOC409814 PE=3 SV=1
A0A088ARD5	135.17	13	4	4	81860	Uncharacterized protein OS=Apis mellifera OX=7460 GN=LOC727486 PE=4 SV=1
A0A088ARN2	128.91	13	5	5	51415	RuvB-like helicase OS=Apis mellifera OX=7460 GN=Reptin PE=3 SV=1
A0A088AA31	125.74	13	2	2	25888	Uncharacterized protein OS=Apis mellifera OX=7460 GN=LOC552707 PE=4 SV=1
A0A088AE77	125.72	13	4	4	58035	Uncharacterized protein OS=Apis mellifera OX=7460 GN=NUP50 PE=4 SV=1
A0A088AGZ4	123.48	13	3	3	45314	Uncharacterized protein OS=Apis mellifera OX=7460 GN=408710 PE=4 SV=1
A0A088A2F9	121.92	13	2	2	22733	Small nuclear ribonucleoprotein-associated protein OS=Apis mellifera OX=7460 GN=Smb PE=3 SV=1
A0A087ZV20	121.02	13	3	3	48546	Uncharacterized protein OS=Apis mellifera OX=7460 GN=LOC408391 PE=3 SV=1
A0A088AUX7	110.56	13	2	2	22394	PRA1 family protein OS=Apis mellifera OX=7460 GN=LOC410130 PE=3 SV=1
A0A088ARG7	108.95	13	2	2	29954	Defective in cullin neddylation protein OS=Apis mellifera OX=7460 GN=LOC550726 PE=4 SV=1
A0A088ARM7	107.77	13	2	2	27981	Uncharacterized protein OS=Apis mellifera OX=7460 GN=LOC724126 PE=4 SV=1
A0A088ARA9	104.88	13	3	3	25303	60S ribosomal protein L13 OS=Apis mellifera OX=7460 GN=RpL13 PE=3 SV=1
A0A088ACR5	101.72	13	3	3	39963	Uncharacterized protein OS=Apis mellifera OX=7460 PE=4 SV=1
A0A088A934	101.63	13	2	2	20708	Signal peptidase complex catalytic subunit SEC11 OS=Apis mellifera OX=7460 GN=Spase18-21 PE=3 SV=1
A0A088ASL1	101.1	13	2	2	28494	Tetraspanin OS=Apis mellifera OX=7460 GN=Tspan9 PE=3 SV=1
A0A088A1C5	99.86	13	3	3	35609	Uncharacterized protein OS=Apis mellifera OX=7460 GN=408361 PE=4 SV=1
A0A088A633	99.77	13	4	4	34510	Uncharacterized protein OS=Apis mellifera OX=7460 GN=LOC725146 PE=4 SV=1
A0A087ZYD3	98.58	13	1	1	13186	Uncharacterized protein OS=Apis mellifera OX=7460 PE=4 SV=1
A0A088AGV6	97.16	13	2	2	17853	Uncharacterized protein OS=Apis mellifera OX=7460 PE=4 SV=1
A0A087ZYZ4	94.25	13	3	3	24577	Vacuolar protein sorting-associated protein 28 homolog OS=Apis mellifera OX=7460 GN=408783 PE=3 SV=1
A0A088ABM1	89.78	13	3	3	38646	Uncharacterized protein OS=Apis mellifera OX=7460 PE=3 SV=1
A0A088ACT1	87.64	13	2	2	20783	Uncharacterized protein OS=Apis mellifera OX=7460 GN=LOC409913 PE=4 SV=1
A0A088AK63	87.56	13	1	1	15368	Uncharacterized protein OS=Apis mellifera OX=7460 GN=LOC409706 PE=4 SV=1
A0A087ZX28	86.64	13	2	2	23243	Uncharacterized protein OS=Apis mellifera OX=7460 GN=LOC551690 PE=4 SV=1
A0A087ZVN5	84.94	13	4	4	37205	Uncharacterized protein OS=Apis mellifera OX=7460 GN=LOC409441 PE=4 SV=1
A0A087ZP87	83.88	13	2	2	23309	Uncharacterized protein OS=Apis mellifera OX=7460 GN=102655603 PE=3 SV=1
A0A088A5K1	83.52	13	2	2	21080	Uncharacterized protein OS=Apis mellifera OX=7460 GN=Ubc-E2H PE=3 SV=1
A0A087ZQT4	82.51	13	3	3	37476	Uncharacterized protein OS=Apis mellifera OX=7460 GN=100576663 PE=4 SV=1
A0A088ATH4	81.78	13	3	3	33803	Uncharacterized protein OS=Apis mellifera OX=7460 GN=LOC411882 PE=4 SV=1
A0A088A956	79.98	13	1	1	19256	Uncharacterized protein OS=Apis mellifera OX=7460 GN=CPR24 PE=4 SV=1
A0A087ZVS0	77.1	13	1	1	20175	Uncharacterized protein OS=Apis mellifera OX=7460 GN=LOC724676 PE=3 SV=1
A0A087ZTV4	76.58	13	3	3	40569	Uncharacterized protein OS=Apis mellifera OX=7460 GN=LOC550914 PE=4 SV=1
H9KID5	71	13	1	1	10456	Small ubiquitin-related modifier OS=Apis mellifera OX=7460 GN=smt3 PE=3 SV=1
I1Z8F5	70.11	13	2	2	29293	Transformer 2 transcript variant 252 OS=Apis mellifera OX=7460 GN=tra2 PE=2 SV=1
I1Z8F2	70.11	13	2	2	29380	Transformer 2 transcript variant 253 OS=Apis mellifera OX=7460 GN=tra2 PE=2 SV=1
A0A087ZUZ4	68.44	13	2	2	24624	Uncharacterized protein OS=Apis mellifera OX=7460 GN=LOC552442 PE=4 SV=1
A0A087ZUJ8	66.25	13	3	3	46904	Uncharacterized protein OS=Apis mellifera OX=7460 PE=4 SV=1
A0A088ADE7	66.14	13	1	1	17599	Uncharacterized protein OS=Apis mellifera OX=7460 PE=4 SV=1
A0A088AIL1	63.78	13	2	2	35861	Uncharacterized protein OS=Apis mellifera OX=7460 GN=LOC412696 PE=4 SV=1
A0A087ZQ38	62.26	13	1	1	19280	Uncharacterized protein OS=Apis mellifera OX=7460 GN=Tapdelta PE=4 SV=1
A0A088AFN0	59.96	13	1	1	17607	Uncharacterized protein OS=Apis mellifera OX=7460 GN=LOC724467 PE=4 SV=1
A0A087ZSG8	54.66	13	3	3	52015	Uncharacterized protein OS=Apis mellifera OX=7460 GN=LOC552049 PE=4 SV=1
A0A088AFV0	48.99	13	1	1	12883	Uncharacterized protein OS=Apis mellifera OX=7460 PE=4 SV=1
A0A088A654	42.63	13	2	2	20069	Uncharacterized protein OS=Apis mellifera OX=7460 GN=100577000 PE=4 SV=1
A0A088AIZ5	36.11	13	1	1	13529	Uncharacterized protein OS=Apis mellifera OX=7460 GN=Rpb11 PE=4 SV=1
A0A088ALQ4	34.78	13	1	1	18546	Uncharacterized protein OS=Apis mellifera OX=7460 PE=3 SV=1
A0A087ZNK3	34.37	13	1	1	15310	DNA-directed RNA polymerase subunit OS=Apis mellifera OX=7460 GN=RpII15 PE=3 SV=1
A0A088AQ20	34.23	13	1	1	15261	Uncharacterized protein OS=Apis mellifera OX=7460 PE=4 SV=1
A0A088ADT0	26.96	13	1	1	27852	Uncharacterized protein OS=Apis mellifera OX=7460 PE=4 SV=1
A0A087ZY96	333.58	14	34	34	446012	Uncharacterized protein OS=Apis mellifera OX=7460 PE=4 SV=1
A0A088AV37	327.71	14	41	41	537888	Uncharacterized protein OS=Apis mellifera OX=7460 GN=LOC408677 PE=4 SV=1
A0A088ADM2	297.17	14	15	15	144934	Serine/threonine-protein phosphatase OS=Apis mellifera OX=7460 GN=LOC411046 PE=3 SV=1
A0A088ACR0	276.82	14	7	7	65538	Uncharacterized protein OS=Apis mellifera OX=7460 PE=3 SV=1
A0A088ARK1	265.53	14	21	21	262258	Uncharacterized protein OS=Apis mellifera OX=7460 PE=4 SV=1
A0A088ANG3	244.07	14	12	12	150068	Uncharacterized protein OS=Apis mellifera OX=7460 PE=4 SV=1
A0A088AL67	244.07	14	12	12	146379	Uncharacterized protein OS=Apis mellifera OX=7460 PE=4 SV=1
A0A088ASK6	220.17	14	17	17	198089	Uncharacterized protein OS=Apis mellifera OX=7460 PE=4 SV=1
A0A088AR30	211.65	14	9	9	101744	Uncharacterized protein OS=Apis mellifera OX=7460 PE=3 SV=1
A0A088AI70	210.91	14	7	7	54953	Uncharacterized protein OS=Apis mellifera OX=7460 PE=4 SV=1
A0A088A7I0	208.18	14	7	7	59741	UDP-glucuronosyltransferase OS=Apis mellifera OX=7460 GN=LOC727593 PE=3 SV=1
A0A088ASV7	203.96	14	6	6	88749	Uncharacterized protein OS=Apis mellifera OX=7460 GN=arm PE=4 SV=1
A0A088AHX5	197.87	14	11	11	131454	Uncharacterized protein OS=Apis mellifera OX=7460 PE=4 SV=1
A0A088AUF4	194.2	14	10	10	135522	Uncharacterized protein OS=Apis mellifera OX=7460 PE=4 SV=1
A0A088AA44	192.98	14	9	9	110384	Uncharacterized protein OS=Apis mellifera OX=7460 GN=LOC410414 PE=4 SV=1
A0A087ZTU2	184.43	14	4	4	69206	Uncharacterized protein OS=Apis mellifera OX=7460 GN=Shal PE=3 SV=1
A0A088A560	179.14	14	12	12	129903	Eukaryotic translation initiation factor 3 subunit A OS=Apis mellifera OX=7460 GN=eIF3-S10 PE=3 SV=1
A0A088AL38	176.41	14	7	7	82403	Enolase-phosphatase E1 OS=Apis mellifera OX=7460 PE=3 SV=1
A0A088A9V7	169.49	14	6	6	65760	Uncharacterized protein OS=Apis mellifera OX=7460 GN=LOC411909 PE=4 SV=1
A0A088AFI6	163.1	14	3	3	34983	Uncharacterized protein OS=Apis mellifera OX=7460 GN=LOC726616 PE=4 SV=1
A0A088ABT0	161.68	14	8	8	103288	Uncharacterized protein OS=Apis mellifera OX=7460 GN=pug PE=3 SV=1
A0A088A084	152.7	14	6	6	81280	AMP deaminase OS=Apis mellifera OX=7460 GN=LOC409444 PE=3 SV=1
A0A088AJF1	151.98	14	3	1	28685	Serine/threonine-protein phosphatase OS=Apis mellifera OX=7460 PE=3 SV=1
A0A088A7C0	149.7	14	5	5	66627	Uncharacterized protein OS=Apis mellifera OX=7460 GN=nkd PE=4 SV=1
A0A088A5X8	144.27	14	3	3	45139	Uncharacterized protein OS=Apis mellifera OX=7460 GN=Nup44A PE=3 SV=1
Q0GQR7	142.88	14	4	4	50277	GABA-gated chloride channel (Fragment) OS=Apis mellifera OX=7460 PE=2 SV=1
A0A088A6Q4	142.8	14	3	3	39734	Uncharacterized protein OS=Apis mellifera OX=7460 GN=LOC725167 PE=4 SV=1
A0A088ABL3	142.62	14	5	5	55578	Uncharacterized protein OS=Apis mellifera OX=7460 GN=P58IPK PE=4 SV=1
A0A088AQ73	142.58	14	5	5	52564	Uncharacterized protein OS=Apis mellifera OX=7460 GN=LOC408945 PE=4 SV=1
A0A088AES1	142.28	14	5	5	49537	Uncharacterized protein OS=Apis mellifera OX=7460 GN=LOC100379261 PE=4 SV=1
A0A087ZZZ5	140.19	14	5	5	65260	Uncharacterized protein OS=Apis mellifera OX=7460 GN=LOC413935 PE=4 SV=1
A0A088ABB0	137.04	14	2	2	26496	Tetraspanin OS=Apis mellifera OX=7460 GN=Tspan12 PE=3 SV=1
A0A087ZV99	127.4	14	4	4	46654	Uncharacterized protein OS=Apis mellifera OX=7460 GN=LOC551972 PE=4 SV=1
A0A087ZQI6	126.22	14	3	3	40424	Uncharacterized protein OS=Apis mellifera OX=7460 GN=LOC411573 PE=3 SV=1
A0A087ZVA1	125.13	14	7	7	89249	Uncharacterized protein OS=Apis mellifera OX=7460 GN=BicD PE=4 SV=1
A0A087ZQY3	125	14	5	5	70552	Uncharacterized protein OS=Apis mellifera OX=7460 GN=LOC551137 PE=4 SV=1
A0A088AWB0	124.8	14	2	2	23574	Uncharacterized protein OS=Apis mellifera OX=7460 PE=4 SV=1
A0A087ZNK5	122.85	14	3	3	32519	Uncharacterized protein OS=Apis mellifera OX=7460 GN=100578522 PE=4 SV=1
A0A088APF8	121.01	14	3	3	43564	Uncharacterized protein OS=Apis mellifera OX=7460 GN=LOC550655 PE=4 SV=1
A0A088ARS3	120.8	14	6	6	68855	Uncharacterized protein OS=Apis mellifera OX=7460 GN=bor PE=4 SV=1
A0A088ARS8	117.5	14	3	3	20122	Uncharacterized protein OS=Apis mellifera OX=7460 PE=4 SV=1
A0A088AVC1	117.15	14	6	6	66208	Uncharacterized protein OS=Apis mellifera OX=7460 PE=4 SV=1
A0A087ZN48	115.41	14	3	3	51940	Uncharacterized protein OS=Apis mellifera OX=7460 GN=LOC410449 PE=4 SV=1
A0A088ADX3	113.26	14	4	4	41452	Uncharacterized protein OS=Apis mellifera OX=7460 GN=LOC412670 PE=3 SV=1
A0A088AAP3	109.58	14	2	2	26579	Uncharacterized protein OS=Apis mellifera OX=7460 PE=4 SV=1
A0A088ANJ8	109.21	14	3	3	36025	Uncharacterized protein OS=Apis mellifera OX=7460 GN=LOC414038 PE=4 SV=1
A0A088AKA7	107.91	14	2	2	22123	Uncharacterized protein OS=Apis mellifera OX=7460 PE=4 SV=1
A0A088A9Q3	107.83	14	3	3	57142	Uncharacterized protein OS=Apis mellifera OX=7460 PE=4 SV=1
A0A087ZV75	107.08	14	3	3	30914	Anamorsin homolog OS=Apis mellifera OX=7460 GN=LOC552386 PE=3 SV=1
A0A088AJK1	102.96	14	3	3	26606	Uncharacterized protein OS=Apis mellifera OX=7460 GN=RpL23A PE=3 SV=1
A0A088APY3	101.8	14	3	3	60177	Uncharacterized protein OS=Apis mellifera OX=7460 GN=LOC408742 PE=4 SV=1
A0A088ACT0	100.54	14	4	4	38964	Uncharacterized protein OS=Apis mellifera OX=7460 PE=4 SV=1
Q868G6	100.54	14	4	4	39039	Tachykinins OS=Apis mellifera OX=7460 GN=Atk PE=1 SV=1
A0A088AHM6	98.84	14	3	3	30024	Uncharacterized protein OS=Apis mellifera OX=7460 GN=LOC726364 PE=4 SV=1
A0A088ACJ9	95.1	14	2	2	23571	Protein RER1 OS=Apis mellifera OX=7460 GN=LOC410094 PE=3 SV=1
A0A088AVZ4	93.61	14	3	3	35388	Uncharacterized protein OS=Apis mellifera OX=7460 PE=4 SV=1
A0A087ZRX6	91.06	14	3	3	34080	Uncharacterized protein OS=Apis mellifera OX=7460 PE=4 SV=1
A0A088AU72	90.63	14	4	4	46395	Uncharacterized protein OS=Apis mellifera OX=7460 GN=Syt7 PE=4 SV=1
A0A087ZPS0	88.94	14	5	5	55025	Glutathione synthetase OS=Apis mellifera OX=7460 GN=LOC411372 PE=3 SV=1
A0A087ZYW8	86.94	14	3	3	34284	Uncharacterized protein OS=Apis mellifera OX=7460 PE=4 SV=1
A0A088A3R3	84.71	14	2	2	24240	Uncharacterized protein OS=Apis mellifera OX=7460 PE=3 SV=1
A0A088AMH4	84.01	14	2	2	27381	Uncharacterized protein OS=Apis mellifera OX=7460 GN=trsn PE=4 SV=1
P85832	78.58	14	1	1	16621	Orcokinin peptides OS=Apis mellifera OX=7460 PE=1 SV=1
A0A0B4J2M8	75.71	14	3	3	37330	Probable tRNA N6-adenosine threonylcarbamoyltransferase OS=Apis mellifera OX=7460 GN=LOC411654 PE=3 SV=1
A0A088AUK2	74.92	14	2	2	24812	Uncharacterized protein OS=Apis mellifera OX=7460 GN=Vamp7 PE=3 SV=1
A0A087ZQC8	71.34	14	1	1	17953	Uncharacterized protein OS=Apis mellifera OX=7460 PE=4 SV=1
I1Z8F6	70.11	14	2	2	27159	Transformer 2 transcript variant 233 OS=Apis mellifera OX=7460 GN=tra2 PE=2 SV=1
I1Z8F3	70.11	14	2	2	27246	Transformer 2 transcript variant 234 OS=Apis mellifera OX=7460 GN=tra2 PE=2 SV=1
A0A087ZT72	69.82	14	2	2	26475	Uncharacterized protein OS=Apis mellifera OX=7460 GN=LOC725171 PE=4 SV=1
A0A088AFV4	66.08	14	2	2	32823	Uncharacterized protein OS=Apis mellifera OX=7460 GN=mRpL28 PE=4 SV=1
A0A088AJZ2	61.87	14	3	3	35757	Ubiquitin carboxyl-terminal hydrolase OS=Apis mellifera OX=7460 GN=Uch-L3 PE=3 SV=1
A0A087ZPW4	56.47	14	1	1	12065	Enhancer of rudimentary homolog OS=Apis mellifera OX=7460 GN=e(r) PE=3 SV=1
A0A088AUS2	55.02	14	1	1	8385	Protein kish OS=Apis mellifera OX=7460 GN=LOC725059 PE=3 SV=1
A0A087ZV44	49.93	14	1	1	19538	Uncharacterized protein OS=Apis mellifera OX=7460 GN=mRpS25 PE=4 SV=1
A0A088ATD9	46.6	14	1	1	7475	Uncharacterized protein OS=Apis mellifera OX=7460 PE=4 SV=1
A0A087ZP89	37.7	14	1	1	22403	Uncharacterized protein OS=Apis mellifera OX=7460 GN=LOC413619 PE=4 SV=1
A0A088AKP9	28.35	14	1	1	13365	Uncharacterized protein OS=Apis mellifera OX=7460 PE=4 SV=1
A0A088A891	255.34	15	18	18	180390	Uncharacterized protein OS=Apis mellifera OX=7460 PE=3 SV=1
A0A088ALU6	247.05	15	10	10	139596	Uncharacterized protein OS=Apis mellifera OX=7460 PE=4 SV=1
A0A087ZWP8	229.67	15	6	6	73726	Uncharacterized protein OS=Apis mellifera OX=7460 PE=3 SV=1
A0A087ZTB5	226.64	15	7	7	57563	Uncharacterized protein OS=Apis mellifera OX=7460 PE=3 SV=1
A0A088A8F0	219.15	15	10	10	115799	Putative H3K9 methyltransferase OS=Apis mellifera OX=7460 PE=4 SV=1
A0A088AB18	211.24	15	6	6	58968	Uncharacterized protein OS=Apis mellifera OX=7460 PE=4 SV=1
A0A087ZUE1	207.59	15	8	8	76960	Uncharacterized protein OS=Apis mellifera OX=7460 PE=4 SV=1
A0A088AVH5	203.96	15	6	6	85684	Uncharacterized protein OS=Apis mellifera OX=7460 PE=4 SV=1
A0A088A150	201.8	15	4	4	54675	Amino acid transporter OS=Apis mellifera OX=7460 GN=LOC409919 PE=3 SV=1
A0A088A2B7	197.66	15	7	7	99815	Uncharacterized protein OS=Apis mellifera OX=7460 PE=4 SV=1
A0A088A0Z9	197.33	15	9	9	106588	Uncharacterized protein OS=Apis mellifera OX=7460 GN=LOC550984 PE=4 SV=1
A0A088ADQ7	192.92	15	8	8	71685	Uncharacterized protein OS=Apis mellifera OX=7460 PE=3 SV=1
A0A088A2T2	192.2	15	9	9	92770	Uncharacterized protein OS=Apis mellifera OX=7460 GN=stmA PE=4 SV=1
A0A088A0P6	189.39	15	4	4	46418	Uncharacterized protein OS=Apis mellifera OX=7460 GN=LOC551636 PE=4 SV=1
A0A087ZYC0	178.18	15	10	10	110349	Uncharacterized protein OS=Apis mellifera OX=7460 GN=LOC727408 PE=4 SV=1
A0A088AQ11	177.05	15	13	13	147680	Uncharacterized protein OS=Apis mellifera OX=7460 GN=LOC551331 PE=4 SV=1
A0A088AEI7	173.62	15	5	5	53352	Uncharacterized protein OS=Apis mellifera OX=7460 PE=4 SV=1
A0A087ZYR9	172.8	15	7	7	62750	Uncharacterized protein OS=Apis mellifera OX=7460 GN=LOC408788 PE=3 SV=1
A0A088ABT8	172.06	15	7	7	92849	Uncharacterized protein OS=Apis mellifera OX=7460 GN=LOC725093 PE=4 SV=1
A0A088A7I2	171.36	15	6	6	60240	UDP-glucuronosyltransferase OS=Apis mellifera OX=7460 GN=LOC409203 PE=3 SV=1
A0A088AQX2	167.72	15	5	5	63405	Eukaryotic translation initiation factor 3 subunit L OS=Apis mellifera OX=7460 GN=LOC552056 PE=3 SV=1
A0A088AVB0	164.69	15	7	7	71727	Uncharacterized protein OS=Apis mellifera OX=7460 GN=LOC410849 PE=3 SV=1
A0A088ACI6	159.13	15	6	6	69324	Uncharacterized protein OS=Apis mellifera OX=7460 GN=LOC413791 PE=4 SV=1
A0A088A9V0	157.19	15	10	10	126238	Anoctamin OS=Apis mellifera OX=7460 GN=LOC408908 PE=3 SV=1
A0A088ANE8	153.98	15	5	5	56915	Uncharacterized protein OS=Apis mellifera OX=7460 PE=4 SV=1
A0A088AMB2	153.88	15	5	5	60517	Uncharacterized protein OS=Apis mellifera OX=7460 GN=Aats-asp PE=3 SV=1
A0A088AEP8	152.97	15	5	5	68640	Uncharacterized protein OS=Apis mellifera OX=7460 GN=LOC413697 PE=4 SV=1
A0A088AA53	152.72	15	6	6	61399	Uncharacterized protein OS=Apis mellifera OX=7460 GN=100577045 PE=4 SV=1
A0A088ARI0	145.75	15	6	6	85713	Uncharacterized protein OS=Apis mellifera OX=7460 PE=4 SV=1
A0A088AU20	145.29	15	5	1	52860	Major royal jelly protein 4 OS=Apis mellifera OX=7460 GN=Mrjp4 PE=4 SV=1
A0A087ZTY2	145.28	15	3	3	31678	Uncharacterized protein OS=Apis mellifera OX=7460 PE=4 SV=1
A0A088AVQ9	139.52	15	4	4	44692	Uncharacterized protein OS=Apis mellifera OX=7460 PE=4 SV=1
A0A088AL08	133.79	15	5	5	58704	Uncharacterized protein OS=Apis mellifera OX=7460 PE=4 SV=1
A0A088AN03	131.82	15	6	6	67578	Uncharacterized protein OS=Apis mellifera OX=7460 GN=LOC551101 PE=4 SV=1
A0A088ARL2	131.23	15	2	2	28438	Uncharacterized protein OS=Apis mellifera OX=7460 GN=U2A PE=4 SV=1
A0A087ZYK4	128.18	15	3	3	36616	Uncharacterized protein OS=Apis mellifera OX=7460 GN=LOC413053 PE=4 SV=1
A0A088ABI0	125.49	15	4	4	48516	Uncharacterized protein OS=Apis mellifera OX=7460 GN=LOC551682 PE=4 SV=1
A0A087ZP46	124.75	15	5	5	60842	Uncharacterized protein OS=Apis mellifera OX=7460 PE=4 SV=1
A0A088AA34	124.46	15	4	4	47632	Uncharacterized protein OS=Apis mellifera OX=7460 GN=Pdk PE=4 SV=1
A0A088A4Z7	124.26	15	4	4	27746	Uncharacterized protein OS=Apis mellifera OX=7460 GN=LOC409847 PE=3 SV=1
A0A088ACY5	119.63	15	5	5	51359	Tubulin gamma chain OS=Apis mellifera OX=7460 GN=TUBG1 PE=3 SV=1
A0A087ZXL9	118.36	15	4	4	46335	Uncharacterized protein OS=Apis mellifera OX=7460 GN=LOC413435 PE=4 SV=1
A0A088ARR5	111.02	15	2	2	30244	Uncharacterized protein OS=Apis mellifera OX=7460 GN=yps PE=4 SV=1
A0A088AET8	108.88	15	2	2	31779	Tetraspanin OS=Apis mellifera OX=7460 GN=102654084 PE=3 SV=1
A0A087ZQ29	106.78	15	4	4	61418	Uncharacterized protein OS=Apis mellifera OX=7460 PE=4 SV=1
A0A088AS49	106.12	15	2	2	24035	Uncharacterized protein OS=Apis mellifera OX=7460 GN=LOC411260 PE=4 SV=1
A0A088A0S0	103.75	15	2	2	27981	Uncharacterized protein OS=Apis mellifera OX=7460 GN=GstO1 PE=3 SV=1
A0A088A590	102.29	15	3	3	34433	Uncharacterized protein OS=Apis mellifera OX=7460 PE=3 SV=1
A0A087ZWJ0	100.36	15	2	2	21159	Uncharacterized protein OS=Apis mellifera OX=7460 PE=4 SV=1
A0A088AAX0	99.69	15	3	3	20068	Uncharacterized protein OS=Apis mellifera OX=7460 GN=Manf PE=4 SV=1
A0A088AL04	99.25	15	3	3	47270	Uncharacterized protein OS=Apis mellifera OX=7460 GN=ade5 PE=3 SV=1
A0A088A549	97.1	15	2	2	36627	Eukaryotic translation initiation factor 3 subunit I OS=Apis mellifera OX=7460 GN=Trip1 PE=3 SV=1
A0A088AAC3	94.04	15	2	2	27202	Uncharacterized protein OS=Apis mellifera OX=7460 GN=100576193 PE=4 SV=1
A0A088A086	91.56	15	1	1	11829	Uncharacterized protein OS=Apis mellifera OX=7460 GN=LOC725797 PE=4 SV=1
A0A088AV56	91.52	15	4	4	38810	Uncharacterized protein OS=Apis mellifera OX=7460 GN=LOC724919 PE=4 SV=1
A0A087ZSM0	87.74	15	2	2	21735	Uncharacterized protein OS=Apis mellifera OX=7460 GN=102656215 PE=4 SV=1
A0A087ZWI6	83.42	15	3	3	36138	Uncharacterized protein OS=Apis mellifera OX=7460 GN=LOC408327 PE=4 SV=1
A0A088A8F3	80.04	15	3	3	28588	ER membrane protein complex subunit 3 OS=Apis mellifera OX=7460 GN=LOC551505 PE=3 SV=1
A0A088AW00	79.71	15	2	2	20393	Uncharacterized protein OS=Apis mellifera OX=7460 PE=4 SV=1
A0A088A886	79.59	15	3	3	34615	Uncharacterized protein OS=Apis mellifera OX=7460 GN=LOC413852 PE=4 SV=1
A0A088ATD5	75.23	15	2	2	20702	Uncharacterized protein OS=Apis mellifera OX=7460 GN=725736 PE=4 SV=1
A0A088ABW2	75.22	15	1	1	20085	Uncharacterized protein OS=Apis mellifera OX=7460 PE=4 SV=1
A0A088A4B3	71.28	15	3	3	33470	Uncharacterized protein OS=Apis mellifera OX=7460 GN=Ufd1-like PE=4 SV=1
A0A088A3L6	68.4	15	2	2	16824	Uncharacterized protein OS=Apis mellifera OX=7460 PE=4 SV=1
A0A088AUX1	63.5	15	1	1	17683	Uncharacterized protein OS=Apis mellifera OX=7460 GN=LOC408648 PE=4 SV=1
A0A088A525	55.22	15	1	1	19084	Uncharacterized protein OS=Apis mellifera OX=7460 GN=mRpS12 PE=3 SV=1
A0A088AJM5	54.78	15	1	1	26324	Tetraspanin OS=Apis mellifera OX=7460 GN=Tspan17 PE=3 SV=1
A0A088A078	53.43	15	2	2	19706	Uncharacterized protein OS=Apis mellifera OX=7460 GN=107964437 PE=4 SV=1
A0A087ZWB9	44.68	15	1	1	8064	Uncharacterized protein OS=Apis mellifera OX=7460 PE=4 SV=1
A0A088A5R1	30.96	15	1	1	16118	Uncharacterized protein OS=Apis mellifera OX=7460 PE=4 SV=1
A0A087ZTU3	27.99	15	1	1	8520	Uncharacterized protein OS=Apis mellifera OX=7460 PE=4 SV=1
A0A088ASN7	332.75	16	23	23	192370	Uncharacterized protein OS=Apis mellifera OX=7460 PE=4 SV=1
A0A088A3X4	292.27	16	19	19	195174	Uncharacterized protein OS=Apis mellifera OX=7460 PE=4 SV=1
A0A087ZST3	277.12	16	11	11	104390	Eukaryotic translation initiation factor 3 subunit C OS=Apis mellifera OX=7460 GN=eIF3-S8 PE=3 SV=1
A0A087ZNW1	269.48	16	14	14	146215	Uncharacterized protein OS=Apis mellifera OX=7460 PE=4 SV=1
A0A087ZV82	267.05	16	19	19	189436	Uncharacterized protein OS=Apis mellifera OX=7460 PE=4 SV=1
A0A088AHG4	243.18	16	13	13	124520	Uncharacterized protein OS=Apis mellifera OX=7460 GN=LOC410201 PE=4 SV=1
A0A087ZUT4	236.01	16	6	6	54273	Uncharacterized protein OS=Apis mellifera OX=7460 GN=409006 PE=4 SV=1
A0A088ADP4	227.63	16	6	6	63040	Uncharacterized protein OS=Apis mellifera OX=7460 PE=4 SV=1
A0A087ZZX4	224.21	16	5	5	49825	Galectin OS=Apis mellifera OX=7460 GN=galectin1 PE=4 SV=1
A0A087ZVG6	221.76	16	8	8	77682	Uncharacterized protein OS=Apis mellifera OX=7460 GN=726030 PE=4 SV=1
A0A088A4M6	213.85	16	7	7	79354	Uncharacterized protein OS=Apis mellifera OX=7460 GN=LOC410041 PE=4 SV=1
Q3B715	210.91	16	7	7	48206	Troponin T isoform 2 OS=Apis mellifera OX=7460 GN=TpnT PE=4 SV=1
Q3B714	210.91	16	7	7	47578	Troponin T isoform 3 OS=Apis mellifera OX=7460 GN=TpnT PE=4 SV=1
Q3B711	210.91	16	7	7	49144	Troponin T isoform 1 OS=Apis mellifera OX=7460 GN=TpnT PE=4 SV=1
Q3B712	210.91	16	7	7	49137	Troponin T isoform 4 OS=Apis mellifera OX=7460 GN=TpnT PE=4 SV=1
A0A087ZW90	200.52	16	9	9	87554	Uncharacterized protein OS=Apis mellifera OX=7460 GN=LOC412154 PE=3 SV=1
A0A088A7X3	196.59	16	12	12	128845	Uncharacterized protein OS=Apis mellifera OX=7460 PE=4 SV=1
A0A088ARD0	186.62	16	9	9	93299	Uncharacterized protein OS=Apis mellifera OX=7460 GN=Hmt-1 PE=4 SV=1
A0A087ZZQ9	181.02	16	5	5	50873	3-hydroxy-3-methylglutaryl coenzyme A synthase OS=Apis mellifera OX=7460 GN=Hmgs PE=3 SV=1
A0A088A941	178.24	16	9	9	103866	Uncharacterized protein OS=Apis mellifera OX=7460 GN=LOC411905 PE=4 SV=1
A0A0B4J2N5	172.83	16	9	8	78660	Uncharacterized protein OS=Apis mellifera OX=7460 GN=bel PE=3 SV=1
A0A088AM57	171.48	16	5	5	63803	Uncharacterized protein OS=Apis mellifera OX=7460 PE=4 SV=1
A0A087ZV47	169.1	16	5	5	47050	Uncharacterized protein OS=Apis mellifera OX=7460 GN=LOC726213 PE=4 SV=1
A0A088AF88	166.75	16	13	13	125354	Uncharacterized protein OS=Apis mellifera OX=7460 GN=Ranbp16 PE=4 SV=1
A0A088AFW7	165.51	16	11	11	97617	Uncharacterized protein OS=Apis mellifera OX=7460 PE=4 SV=1
A0A088ALL3	165.19	16	3	3	36183	Uncharacterized protein OS=Apis mellifera OX=7460 GN=LOC726793 PE=4 SV=1
A0A088AD05	163.4	16	5	5	44067	Fatty acyl-CoA reductase OS=Apis mellifera OX=7460 PE=3 SV=1
A0A088AM39	161.79	16	4	4	41822	Uncharacterized protein OS=Apis mellifera OX=7460 GN=LOC551189 PE=3 SV=1
A0A088ACQ9	160.24	16	3	3	32080	Uncharacterized protein OS=Apis mellifera OX=7460 GN=LOC551047 PE=4 SV=1
A0A088AQR5	156.82	16	4	4	36408	Uncharacterized protein OS=Apis mellifera OX=7460 PE=4 SV=1
A0A088AF83	153.84	16	6	6	60150	Uncharacterized protein OS=Apis mellifera OX=7460 GN=LOC725623 PE=4 SV=1
A0A087ZSQ8	151.3	16	3	3	35531	Uncharacterized protein OS=Apis mellifera OX=7460 GN=726713 PE=4 SV=1
A0A088A207	145.08	16	3	3	34751	Coatomer subunit epsilon OS=Apis mellifera OX=7460 PE=3 SV=1
A0A087ZRY9	139.59	16	5	5	54042	Uncharacterized protein OS=Apis mellifera OX=7460 GN=LOC551009 PE=4 SV=1
A0A087ZZP4	139.23	16	4	3	36762	Uncharacterized protein OS=Apis mellifera OX=7460 GN=LOC412442 PE=3 SV=1
A0A087ZZ05	135.31	16	3	3	23885	Ribosomal protein L15 OS=Apis mellifera OX=7460 GN=RpL15 PE=3 SV=1
A0A087ZUG2	133.2	16	3	2	24646	Uncharacterized protein OS=Apis mellifera OX=7460 PE=4 SV=1
A0A088AH98	130.39	16	3	3	34660	Uncharacterized protein OS=Apis mellifera OX=7460 GN=LOC412388 PE=4 SV=1
A0A087ZZL2	128.92	16	6	6	72352	Uncharacterized protein OS=Apis mellifera OX=7460 GN=LOC724672 PE=4 SV=1
A0A088AHR1	127.81	16	3	3	29848	Uncharacterized protein OS=Apis mellifera OX=7460 PE=4 SV=1
A0A088A730	127.71	16	3	3	29831	Uncharacterized protein OS=Apis mellifera OX=7460 PE=4 SV=1
A0A088AV14	124.72	16	4	4	44609	Uncharacterized protein OS=Apis mellifera OX=7460 GN=Arc42 PE=3 SV=1
T1SG89	123.99	16	4	4	61202	Calcium channel beta subunit variant c OS=Apis mellifera OX=7460 GN=Ca-beta PE=2 SV=1
T1SG86	123.99	16	4	4	61576	Calcium channel beta subunit variant a OS=Apis mellifera OX=7460 GN=Ca-beta PE=2 SV=1
A0A088AMI1	123.47	16	3	3	22413	Uncharacterized protein OS=Apis mellifera OX=7460 GN=LOC724487 PE=4 SV=1
A0A087ZR56	121.93	16	3	3	37383	Uncharacterized protein OS=Apis mellifera OX=7460 GN=LOC412599 PE=4 SV=1
A0A088A4T3	121.72	16	2	2	15183	Structural cuticle protein OS=Apis mellifera OX=7460 GN=CPR14 PE=4 SV=1
A0A088AVQ1	115.21	16	3	3	30713	Uncharacterized protein OS=Apis mellifera OX=7460 GN=LOC410943 PE=4 SV=1
A0A0B4J2N7	115.01	16	4	4	38702	Uncharacterized protein OS=Apis mellifera OX=7460 GN=CSN5 PE=4 SV=1
A0A088AHD2	114.05	16	1	1	16564	Protein quiver OS=Apis mellifera OX=7460 GN=LOC726268 PE=3 SV=1
A0A088ARB9	107.58	16	5	5	67565	Uncharacterized protein OS=Apis mellifera OX=7460 PE=4 SV=1
A0A088AAI1	103.95	16	2	2	21091	Calcium load-activated calcium channel OS=Apis mellifera OX=7460 GN=LOC552501 PE=3 SV=1
A0A088ANR4	102.24	16	3	3	41300	Uncharacterized protein OS=Apis mellifera OX=7460 GN=mRpL3 PE=4 SV=1
A0A088AH64	97.31	16	2	2	22975	Uncharacterized protein OS=Apis mellifera OX=7460 PE=4 SV=1
A0A088A5X1	93.45	16	2	2	20465	Uncharacterized protein OS=Apis mellifera OX=7460 GN=Vps25 PE=4 SV=1
A0A088A5M5	90.47	16	4	4	43189	Peptidylprolyl isomerase OS=Apis mellifera OX=7460 GN=LOC550701 PE=4 SV=1
A0A088A199	86.03	16	1	1	14573	Uncharacterized protein OS=Apis mellifera OX=7460 GN=LOC408308 PE=4 SV=1
A0A088A6Z2	85.97	16	1	1	17081	Uncharacterized protein OS=Apis mellifera OX=7460 GN=Lys-3 PE=4 SV=1
A0A087ZR08	77.64	16	1	1	11261	Uncharacterized protein OS=Apis mellifera OX=7460 PE=4 SV=1
A0A088A396	77.39	16	2	2	35694	Uncharacterized protein OS=Apis mellifera OX=7460 GN=LOC409725 PE=4 SV=1
A0A087ZVY3	59.58	16	2	2	22686	Uncharacterized protein OS=Apis mellifera OX=7460 GN=LOC408601 PE=4 SV=1
A0A088AGW5	59.42	16	2	2	17642	Uncharacterized protein OS=Apis mellifera OX=7460 GN=LOC726085 PE=4 SV=1
A0A088AGJ0	57.92	16	2	2	22513	Uncharacterized protein OS=Apis mellifera OX=7460 GN=mRpL43 PE=4 SV=1
A0A088ANG4	47.7	16	1	1	15890	Uncharacterized protein OS=Apis mellifera OX=7460 PE=4 SV=1
A0A088ANT5	45.98	16	1	1	12281	Uncharacterized protein OS=Apis mellifera OX=7460 GN=100577960 PE=4 SV=1
A0A087ZTN7	39.75	16	1	1	9230	Uncharacterized protein OS=Apis mellifera OX=7460 PE=4 SV=1
A0A088AAS2	31.17	16	1	1	11541	Uncharacterized protein OS=Apis mellifera OX=7460 PE=4 SV=1
A0A088A801	29	16	1	1	12400	Uncharacterized protein OS=Apis mellifera OX=7460 PE=4 SV=1
A0A087ZYV1	376.9	17	80	80	768969	Uncharacterized protein OS=Apis mellifera OX=7460 PE=4 SV=1
A0A088A279	318.36	17	22	22	219712	Uncharacterized protein OS=Apis mellifera OX=7460 PE=4 SV=1
A0A087ZR35	295.99	17	12	12	140149	Uncharacterized protein OS=Apis mellifera OX=7460 GN=pita PE=4 SV=1
A0A087ZSB5	256.62	17	11	11	125064	Uncharacterized protein OS=Apis mellifera OX=7460 GN=LOC408497 PE=4 SV=1
A0A088A0Z8	255.05	17	15	15	141634	Uncharacterized protein OS=Apis mellifera OX=7460 PE=4 SV=1
A0A088AJQ9	243.49	17	13	13	128858	Uncharacterized protein OS=Apis mellifera OX=7460 PE=3 SV=1
A0A088AT93	240.72	17	9	8	69357	Transporter OS=Apis mellifera OX=7460 GN=Gat-a PE=3 SV=1
A0A087ZZH1	232.3	17	13	13	141398	Uncharacterized protein OS=Apis mellifera OX=7460 PE=4 SV=1
A0A087ZWB0	228.3	17	12	12	113108	Uncharacterized protein OS=Apis mellifera OX=7460 GN=LOC413427 PE=4 SV=1
Q3B713	210.91	17	7	7	46411	Troponin T isoform 5 OS=Apis mellifera OX=7460 GN=TpnT PE=4 SV=1
A0A088AGI6	196.18	17	5	4	35220	Uncharacterized protein OS=Apis mellifera OX=7460 GN=LOC412163 PE=4 SV=1
A0A087ZTC9	175.36	17	5	5	36932	Uncharacterized protein OS=Apis mellifera OX=7460 PE=3 SV=1
A0A087ZUP4	167.74	17	6	6	65899	Serine/threonine protein phosphatase 2A regulatory subunit OS=Apis mellifera OX=7460 GN=LOC408949 PE=3 SV=1
A0A087ZW72	166.73	17	5	5	41918	Uncharacterized protein OS=Apis mellifera OX=7460 GN=LOC409766 PE=4 SV=1
A0A087ZY83	166.03	17	7	7	64022	Uncharacterized protein OS=Apis mellifera OX=7460 GN=LOC409991 PE=4 SV=1
A0A088AH15	162.32	17	3	3	24224	Uncharacterized protein OS=Apis mellifera OX=7460 PE=4 SV=1
A0A087ZQV8	159.29	17	6	6	84767	Uncharacterized protein OS=Apis mellifera OX=7460 GN=LOC409565 PE=4 SV=1
Q5BLY4	153.72	17	4	4	24819	Icarapin-like OS=Apis mellifera OX=7460 PE=2 SV=1
A0A088AET0	152.51	17	6	6	61611	Uncharacterized protein OS=Apis mellifera OX=7460 GN=Sply PE=3 SV=1
A0A088A873	151.48	17	8	8	60004	Uncharacterized protein OS=Apis mellifera OX=7460 PE=4 SV=1
A0A088ANX1	143.68	17	8	8	62385	Aldehyde dehydrogenase OS=Apis mellifera OX=7460 PE=3 SV=1
O77249	142.88	17	4	4	41627	GABA receptor Rdl subunit (Fragment) OS=Apis mellifera OX=7460 PE=2 SV=1
A0A088A3T9	142.61	17	4	4	36443	Uncharacterized protein OS=Apis mellifera OX=7460 GN=LOC409366 PE=4 SV=1
A0A087ZSV2	141.09	17	7	7	63126	Uncharacterized protein OS=Apis mellifera OX=7460 PE=4 SV=1
A0A0B4J2P8	137.5	17	3	3	21865	Uncharacterized protein OS=Apis mellifera OX=7460 GN=LOC552138 PE=4 SV=1
A0A088AQX7	135.98	17	9	9	93585	Uncharacterized protein OS=Apis mellifera OX=7460 PE=3 SV=1
A0A088AP95	133.3	17	3	3	53652	Uncharacterized protein OS=Apis mellifera OX=7460 PE=4 SV=1
A0A088AST4	128.77	17	3	3	28007	Uncharacterized protein OS=Apis mellifera OX=7460 PE=4 SV=1
A0A088AMG0	126.68	17	3	3	23009	Proteasome subunit beta OS=Apis mellifera OX=7460 GN=LOC552579 PE=3 SV=1
A0A088ACC0	124.65	17	7	7	62140	Uncharacterized protein OS=Apis mellifera OX=7460 GN=LOC724212 PE=4 SV=1
A0A087ZMZ3	123.99	17	4	4	55185	Calcium channel beta subunit variant b OS=Apis mellifera OX=7460 GN=Ca-beta PE=4 SV=1
A0A087ZVR2	122.1	17	3	1	22918	Uncharacterized protein OS=Apis mellifera OX=7460 GN=Rab10 PE=4 SV=1
A5A5E4	121.72	17	2	2	14562	Structural cuticle protein (Fragment) OS=Apis mellifera OX=7460 PE=2 SV=1
A0A088AEZ9	121.57	17	3	3	37152	Uncharacterized protein OS=Apis mellifera OX=7460 GN=Lman2 PE=4 SV=1
A0A088AP58	121.53	17	2	2	21747	Uncharacterized protein OS=Apis mellifera OX=7460 GN=elm PE=4 SV=1
A0A088AQA3	120.88	17	4	4	47067	3-oxoacyl-[acyl-carrier-protein] synthase OS=Apis mellifera OX=7460 GN=LOC413655 PE=3 SV=1
A0A087ZWA2	114.58	17	3	3	33288	Uncharacterized protein OS=Apis mellifera OX=7460 PE=4 SV=1
A0A087ZTL5	112.83	17	2	2	20780	Receptor expression-enhancing protein OS=Apis mellifera OX=7460 GN=LOC551678 PE=3 SV=1
A0A088A8H4	108.66	17	2	2	21243	Uncharacterized protein OS=Apis mellifera OX=7460 GN=LOC727019 PE=4 SV=1
A0A087ZZ68	102.35	17	3	2	36079	Uncharacterized protein OS=Apis mellifera OX=7460 PE=4 SV=1
A0A087ZST6	99.82	17	6	6	47846	Uncharacterized protein OS=Apis mellifera OX=7460 GN=LOC413724 PE=4 SV=1
A0A088AA04	90.68	17	2	2	24528	Uncharacterized protein OS=Apis mellifera OX=7460 GN=LOC410103 PE=4 SV=1
A0A088A5E0	89.47	17	1	1	10976	Uncharacterized protein OS=Apis mellifera OX=7460 GN=102656491 PE=4 SV=1
A0A088A9M8	85.29	17	4	4	45737	Uncharacterized protein OS=Apis mellifera OX=7460 GN=lobe PE=4 SV=1
A0A088AVP1	83.06	17	5	5	59441	Uncharacterized protein OS=Apis mellifera OX=7460 PE=4 SV=1
A0A088AHC5	78.74	17	2	2	19664	Uncharacterized protein OS=Apis mellifera OX=7460 PE=4 SV=1
A0A088AKM8	74.3	17	2	2	24923	Uncharacterized protein OS=Apis mellifera OX=7460 GN=Tpx-5 PE=4 SV=1
A0A087ZMS5	73.58	17	1	1	12526	Small nuclear ribonucleoprotein Sm D2 OS=Apis mellifera OX=7460 PE=3 SV=1
A0A088AKR9	72.48	17	1	1	14979	Uncharacterized protein OS=Apis mellifera OX=7460 PE=4 SV=1
A0A087ZP05	71.72	17	2	2	26344	Uncharacterized protein OS=Apis mellifera OX=7460 GN=LOC413253 PE=4 SV=1
A0A088AC05	63.23	17	2	2	12935	Uncharacterized protein OS=Apis mellifera OX=7460 GN=LOC551318 PE=4 SV=1
A0A088ALY7	57.2	17	1	1	9805	Uncharacterized protein OS=Apis mellifera OX=7460 PE=4 SV=1
A0A088AN50	44.91	17	1	1	13823	Uncharacterized protein OS=Apis mellifera OX=7460 GN=Ssb-c31a PE=4 SV=1
A0A088AE34	33.83	17	1	1	7300	Uncharacterized protein OS=Apis mellifera OX=7460 PE=4 SV=1
A0A087ZRH1	32.17	17	1	1	8777	Uncharacterized protein OS=Apis mellifera OX=7460 PE=4 SV=1
A0A088AHV8	30.32	17	1	1	9875	Uncharacterized protein OS=Apis mellifera OX=7460 PE=4 SV=1
A0A087ZVI4	355.41	18	34	34	254515	Uncharacterized protein OS=Apis mellifera OX=7460 PE=4 SV=1
A0A088A0C5	302.67	18	14	14	142338	Uncharacterized protein OS=Apis mellifera OX=7460 GN=LOC408841 PE=4 SV=1
A0A088AGS8	256.77	18	20	20	183217	Uncharacterized protein OS=Apis mellifera OX=7460 PE=3 SV=1
A0A088A6G0	247.59	18	12	12	116406	Oxysterol-binding protein OS=Apis mellifera OX=7460 PE=3 SV=1
A0A087ZTJ1	242.41	18	10	10	85758	Uncharacterized protein OS=Apis mellifera OX=7460 GN=LOC408565 PE=4 SV=1
A0A088A859	240.83	18	8	8	70843	Proteasome endopeptidase complex OS=Apis mellifera OX=7460 GN=Pros29 PE=3 SV=1
A0A087ZSR6	236.29	18	9	9	70632	Carboxylic ester hydrolase OS=Apis mellifera OX=7460 GN=AChE-2 PE=2 SV=1
Q4LEZ2	236.29	18	9	9	70680	Carboxylic ester hydrolase OS=Apis mellifera OX=7460 GN=AChE PE=2 SV=1
A0A088AB73	227.76	18	9	9	83870	Uncharacterized protein OS=Apis mellifera OX=7460 PE=4 SV=1
A0A088A5P5	215.08	18	11	11	85585	Uncharacterized protein OS=Apis mellifera OX=7460 GN=LOC410289 PE=4 SV=1
A0A088ALR1	212.38	18	7	7	41620	Uncharacterized protein OS=Apis mellifera OX=7460 GN=726199 PE=4 SV=1
A0A087ZTD1	211.2	18	7	7	63116	Uncharacterized protein OS=Apis mellifera OX=7460 PE=4 SV=1
A0A088A722	210.46	18	5	5	48466	Uncharacterized protein OS=Apis mellifera OX=7460 PE=4 SV=1
A0A088AFE2	209.19	18	5	5	56555	Uncharacterized protein OS=Apis mellifera OX=7460 GN=LOC724160 PE=4 SV=1
A0A088AI92	208.09	18	14	14	105011	Aminopeptidase OS=Apis mellifera OX=7460 PE=3 SV=1
A0A088AAR1	207.62	18	12	12	99701	Uncharacterized protein OS=Apis mellifera OX=7460 GN=LOC552477 PE=3 SV=1
A0A088A647	205.26	18	9	9	84011	Ribosomal protein S6 kinase OS=Apis mellifera OX=7460 GN=S6kII PE=3 SV=1
A0A088AV92	201.88	18	6	6	58670	Uncharacterized protein OS=Apis mellifera OX=7460 PE=4 SV=1
A0A088ACI9	195.36	18	7	7	67593	Lysine--tRNA ligase OS=Apis mellifera OX=7460 GN=Aats-lys PE=3 SV=1
A0A088AJB2	195.03	18	5	5	42980	Uncharacterized protein OS=Apis mellifera OX=7460 PE=4 SV=1
A0A088A929	189.78	18	9	9	76921	Uncharacterized protein OS=Apis mellifera OX=7460 PE=4 SV=1
A0A087ZQM4	188.45	18	9	9	87190	Uncharacterized protein OS=Apis mellifera OX=7460 GN=LOC409927 PE=4 SV=1
A0A088AGJ5	176.34	18	10	10	81800	Uncharacterized protein OS=Apis mellifera OX=7460 GN=LOC551824 PE=4 SV=1
A0A088A0L8	176.27	18	9	9	89335	Uncharacterized protein OS=Apis mellifera OX=7460 PE=4 SV=1
A0A087ZWD6	176.05	18	4	4	22908	Uncharacterized protein OS=Apis mellifera OX=7460 GN=102656587 PE=4 SV=1
A0A088A8C5	159.86	18	6	6	59761	Uncharacterized protein OS=Apis mellifera OX=7460 PE=4 SV=1
A0A087ZTW9	155.44	18	4	3	48688	Uncharacterized protein OS=Apis mellifera OX=7460 PE=3 SV=1
A0A087ZPU1	146.15	18	3	3	28096	Uncharacterized protein OS=Apis mellifera OX=7460 GN=LOC724721 PE=3 SV=1
A0A087ZVW2	143.4	18	2	2	18658	Uncharacterized protein OS=Apis mellifera OX=7460 GN=LOC551126 PE=4 SV=1
A0A087ZQN7	142.49	18	6	5	57784	Tyrosine-protein kinase OS=Apis mellifera OX=7460 GN=LOC412588 PE=3 SV=1
A0A088A7M1	141.76	18	4	1	22997	Uncharacterized protein OS=Apis mellifera OX=7460 GN=100577870 PE=4 SV=1
A0A088A0F7	132.19	18	2	2	24407	Uncharacterized protein OS=Apis mellifera OX=7460 GN=LOC552659 PE=4 SV=1
A0A088AD00	129.9	18	3	3	36772	Uncharacterized protein OS=Apis mellifera OX=7460 GN=LOC410167 PE=4 SV=1
A0A088A2C1	127.7	18	2	2	18480	Uncharacterized protein OS=Apis mellifera OX=7460 PE=4 SV=1
T1SG87	123.99	18	4	4	52478	Calcium channel beta subunit variant b OS=Apis mellifera OX=7460 GN=Ca-beta PE=2 SV=1
A0A088AIP6	121.25	18	5	5	38634	Uncharacterized protein OS=Apis mellifera OX=7460 PE=4 SV=1
A0A088AT40	119.68	18	4	4	23798	Uncharacterized protein OS=Apis mellifera OX=7460 PE=4 SV=1
A0A088A5S2	112.92	18	3	3	37854	Uncharacterized protein OS=Apis mellifera OX=7460 PE=4 SV=1
A0A087ZWA0	111.68	18	8	8	60809	Non-specific serine/threonine protein kinase OS=Apis mellifera OX=7460 GN=Akt1 PE=4 SV=1
A0A088AF78	111.05	18	3	3	19097	Calponin OS=Apis mellifera OX=7460 GN=LOC408532 PE=3 SV=1
A0A088A8G8	107.77	18	5	5	55959	Uncharacterized protein OS=Apis mellifera OX=7460 PE=4 SV=1
A0A088AQM6	105.03	18	3	3	27410	Uncharacterized protein OS=Apis mellifera OX=7460 GN=LOC724118 PE=4 SV=1
A0A087ZZX6	100.06	18	3	3	28309	Uncharacterized protein OS=Apis mellifera OX=7460 GN=725363 PE=4 SV=1
A0A088AUL3	99.69	18	3	3	35907	Uncharacterized protein OS=Apis mellifera OX=7460 GN=Pvf1 PE=3 SV=1
A0A087ZXJ1	99.17	18	4	4	42264	Uncharacterized protein OS=Apis mellifera OX=7460 PE=4 SV=1
A0A087ZSV1	97.63	18	3	3	42202	Uncharacterized protein OS=Apis mellifera OX=7460 PE=4 SV=1
A0A088A8V7	97.43	18	3	3	27740	Uncharacterized protein OS=Apis mellifera OX=7460 GN=SrpRbeta PE=4 SV=1
A0A087ZRP7	96.03	18	3	3	32032	Uncharacterized protein OS=Apis mellifera OX=7460 PE=4 SV=1
A0A088A2J7	93.62	18	2	2	25681	Protein YIPF OS=Apis mellifera OX=7460 GN=LOC413898 PE=3 SV=1
A0A088A3M3	90.91	18	3	3	37852	Uncharacterized protein OS=Apis mellifera OX=7460 GN=mRpS35 PE=4 SV=1
A0A088APZ4	89.86	18	2	2	20703	Density-regulated protein OS=Apis mellifera OX=7460 GN=LOC552539 PE=3 SV=1
A0A087ZWE7	89.79	18	1	1	8223	Uncharacterized protein OS=Apis mellifera OX=7460 PE=4 SV=1
A0A088AAM8	88.96	18	4	4	31001	Uncharacterized protein OS=Apis mellifera OX=7460 GN=LOC410023 PE=4 SV=1
A0A088A3X3	88.23	18	3	3	28355	Uncharacterized protein OS=Apis mellifera OX=7460 PE=4 SV=1
A0A087ZZ11	85.26	18	1	1	9755	Uncharacterized protein OS=Apis mellifera OX=7460 GN=LOC552809 PE=4 SV=1
Q3B706	84.31	18	2	2	24365	Troponin I isoform 6b2 OS=Apis mellifera OX=7460 GN=TpnI PE=4 SV=1
A0A087ZNJ7	81.24	18	3	3	42255	Aldose 1-epimerase OS=Apis mellifera OX=7460 GN=LOC552086 PE=3 SV=1
A0A088AEN8	80.25	18	1	1	14488	Uncharacterized protein OS=Apis mellifera OX=7460 PE=4 SV=1
A0A087ZXE0	76.05	18	3	3	28823	Uncharacterized protein OS=Apis mellifera OX=7460 PE=4 SV=1
A0A088AUA2	74.84	18	1	1	16334	Uncharacterized protein OS=Apis mellifera OX=7460 PE=4 SV=1
A0A088AN62	73.07	18	1	1	7500	Uncharacterized protein OS=Apis mellifera OX=7460 GN=LOC724629 PE=3 SV=1
A0A088ADM7	73.07	18	1	1	7386	Uncharacterized protein OS=Apis mellifera OX=7460 GN=LOC724531 PE=3 SV=1
A0A088AC82	64.29	18	1	1	9203	Uncharacterized protein OS=Apis mellifera OX=7460 PE=4 SV=1
A0A088AR49	54.48	18	2	2	21857	Uncharacterized protein OS=Apis mellifera OX=7460 PE=4 SV=1
A0A087ZS41	54.33	18	2	2	20050	Uncharacterized protein OS=Apis mellifera OX=7460 GN=100577362 PE=4 SV=1
A0A088AK93	50.37	18	1	1	17786	Uncharacterized protein OS=Apis mellifera OX=7460 GN=LOC726782 PE=4 SV=1
A0A088ATW9	45.06	18	1	1	6941	Uncharacterized protein OS=Apis mellifera OX=7460 GN=100302106 PE=4 SV=1
A0A0B5EIM5	302.67	19	14	14	138770	Voltage dependent Ca2+ channel Cav alpha2delta1 subunit OS=Apis mellifera OX=7460 GN=Cava2d1 PE=2 SV=1
A0A087ZQ26	296.22	19	17	17	183993	Uncharacterized protein OS=Apis mellifera OX=7460 PE=4 SV=1
A0A088AEI6	278.77	19	21	21	218063	Uncharacterized protein OS=Apis mellifera OX=7460 PE=4 SV=1
A0A088AMM2	277.57	19	15	15	113676	Uncharacterized protein OS=Apis mellifera OX=7460 GN=opa1-like PE=3 SV=1
I4EC01	249.71	19	16	16	146635	Adenylyl cyclase OS=Apis mellifera OX=7460 GN=ac8 PE=2 SV=1
A0A088ASD7	249.71	19	16	16	145808	Uncharacterized protein OS=Apis mellifera OX=7460 PE=3 SV=1
A0A087ZV81	244.32	19	12	12	109549	Uncharacterized protein OS=Apis mellifera OX=7460 PE=4 SV=1
A0A087ZRU4	239.36	19	12	12	144039	Uncharacterized protein OS=Apis mellifera OX=7460 PE=4 SV=1
A0A088AI17	214.73	19	3	3	17522	Uncharacterized protein OS=Apis mellifera OX=7460 PE=4 SV=1
A0A088AGA9	209.18	19	7	7	39812	Uncharacterized protein OS=Apis mellifera OX=7460 PE=4 SV=1
A0A088A0K0	209.18	19	5	5	43895	Uncharacterized protein OS=Apis mellifera OX=7460 PE=4 SV=1
A0A087ZUG7	206.21	19	12	12	96476	V-type proton ATPase subunit a OS=Apis mellifera OX=7460 PE=3 SV=1
A0A087ZQ49	203.51	19	7	7	52168	CAAX prenyl protease OS=Apis mellifera OX=7460 GN=LOC551466 PE=3 SV=1
A0A088AQX9	201.44	19	10	10	58625	Serine hydroxymethyltransferase OS=Apis mellifera OX=7460 GN=LOC411796 PE=3 SV=1
A0A087ZSS8	197.08	19	15	15	109137	Uncharacterized protein OS=Apis mellifera OX=7460 GN=LOC413912 PE=4 SV=1
Q5XQT6	189.78	19	9	9	76350	Hyperpolarization-activated ion channel variant L OS=Apis mellifera OX=7460 PE=2 SV=1
A0A088AC80	186.09	19	10	10	81550	Eukaryotic translation initiation factor 3 subunit B OS=Apis mellifera OX=7460 GN=eIF3-S9 PE=3 SV=1
A0A087ZRD2	185.9	19	6	6	44138	Uncharacterized protein OS=Apis mellifera OX=7460 PE=3 SV=1
A0A088AL31	185.45	19	9	6	84588	Uncharacterized protein OS=Apis mellifera OX=7460 PE=4 SV=1
A0A088ABQ2	178.3	19	5	5	44380	Uncharacterized protein OS=Apis mellifera OX=7460 GN=727106 PE=4 SV=1
A0A088AMC3	176.79	19	11	11	101103	Uncharacterized protein OS=Apis mellifera OX=7460 PE=4 SV=1
A0A088AIR9	172.53	19	8	8	67945	CTP synthase OS=Apis mellifera OX=7460 GN=LOC551835 PE=3 SV=1
A0A087ZNU2	164	19	4	4	22760	Uncharacterized protein OS=Apis mellifera OX=7460 GN=Ykt6 PE=3 SV=1
A0A088ADG2	161.52	19	6	6	55839	O-phosphoseryl-tRNA(Sec) selenium transferase OS=Apis mellifera OX=7460 GN=LOC552745 PE=3 SV=1
A0A088A202	154.09	19	5	5	39859	Uncharacterized protein OS=Apis mellifera OX=7460 PE=4 SV=1
A0A087ZX99	135.16	19	6	6	40316	Uncharacterized protein OS=Apis mellifera OX=7460 PE=4 SV=1
A0A087ZNE1	130.39	19	3	3	29364	Uncharacterized protein OS=Apis mellifera OX=7460 PE=4 SV=1
A0A088A4N3	125.95	19	5	5	36188	Eukaryotic translation initiation factor 3 subunit H OS=Apis mellifera OX=7460 PE=3 SV=1
A0A087ZX19	125.91	19	4	4	34396	Uncharacterized protein OS=Apis mellifera OX=7460 GN=100578624 PE=3 SV=1
A0A088AC74	119.72	19	3	3	17673	Uncharacterized protein OS=Apis mellifera OX=7460 PE=3 SV=1
A0A087ZU08	115.14	19	3	3	38212	Uncharacterized protein OS=Apis mellifera OX=7460 GN=LOC409105 PE=4 SV=1
A0A088A8V8	114.24	19	3	3	28100	Uncharacterized protein OS=Apis mellifera OX=7460 GN=LOC409066 PE=3 SV=1
A0A088A3K0	110.93	19	2	2	18077	Uncharacterized protein OS=Apis mellifera OX=7460 GN=snapin PE=4 SV=1
A0A088ARU1	110.19	19	4	4	27358	Uncharacterized protein OS=Apis mellifera OX=7460 GN=LOC552675 PE=4 SV=1
A0A088A8C3	109.83	19	2	2	19511	ER membrane protein complex subunit 4 OS=Apis mellifera OX=7460 GN=LOC412349 PE=3 SV=1
Q3LBA7	96.7	19	1	1	13844	Chemosensory protein 1 OS=Apis mellifera OX=7460 GN=CSP1 PE=2 SV=1
Q2V0C9	96.22	19	5	5	56221	Cystathionine beta-synthase OS=Apis mellifera OX=7460 GN=AmCBS PE=1 SV=1
A0A088AKK4	94.09	19	2	2	17379	Uncharacterized protein OS=Apis mellifera OX=7460 PE=4 SV=1
A0A088ALW7	90.78	19	2	2	26930	Putative lipoyltransferase 2 mitochondrial OS=Apis mellifera OX=7460 GN=LOC726239 PE=3 SV=1
A0A088AHC4	88.53	19	2	2	16621	Uncharacterized protein OS=Apis mellifera OX=7460 PE=4 SV=1
A0A087ZT28	88.1	19	3	2	23024	Uncharacterized protein OS=Apis mellifera OX=7460 GN=LOC409529 PE=4 SV=1
A0A088APZ0	85.08	19	1	1	13647	Uncharacterized protein OS=Apis mellifera OX=7460 GN=LOC551654 PE=4 SV=1
A0A0B4J2P3	82.15	19	3	3	13381	60S ribosomal protein L36 OS=Apis mellifera OX=7460 GN=RpL36 PE=3 SV=1
A0A088A0P7	80.49	19	1	1	10913	Uncharacterized protein OS=Apis mellifera OX=7460 GN=LOC725882 PE=4 SV=1
A0A087ZMX7	67.73	19	2	2	21219	Uncharacterized protein OS=Apis mellifera OX=7460 GN=LOC408424 PE=4 SV=1
A0A088A6U5	61.85	19	2	2	11946	U6 snRNA-associated Sm-like protein LSm3 OS=Apis mellifera OX=7460 GN=LOC725401 PE=3 SV=1
A0A088AQ89	27.25	19	1	1	12459	Uncharacterized protein OS=Apis mellifera OX=7460 PE=4 SV=1
A0A088AFA3	341.69	20	11	11	106859	Uncharacterized protein OS=Apis mellifera OX=7460 GN=LOC410613 PE=4 SV=1
A0A088AGS1	273.49	20	14	14	117836	Uncharacterized protein OS=Apis mellifera OX=7460 PE=4 SV=1
A0A088A052	271.03	20	10	10	91438	Ubiquitin carboxyl-terminal hydrolase OS=Apis mellifera OX=7460 GN=LOC552324 PE=3 SV=1
A0A088APX8	258.91	20	16	16	142419	Uncharacterized protein OS=Apis mellifera OX=7460 PE=4 SV=1
A0A088A9Y9	255.6	20	24	24	205671	Uncharacterized protein OS=Apis mellifera OX=7460 PE=4 SV=1
A0A088AQ05	235.57	20	5	5	56535	Uncharacterized protein OS=Apis mellifera OX=7460 PE=4 SV=1
A0A087ZQD0	229.51	20	13	13	96853	Uncharacterized protein OS=Apis mellifera OX=7460 PE=3 SV=1
A0A088APM8	206.32	20	8	8	69916	Uncharacterized protein OS=Apis mellifera OX=7460 PE=4 SV=1
A0A088AFJ2	181.85	20	5	5	43977	Uncharacterized protein OS=Apis mellifera OX=7460 GN=Pros54 PE=4 SV=1
A0A087ZN16	179.44	20	7	7	58568	Uncharacterized protein OS=Apis mellifera OX=7460 GN=LOC408433 PE=4 SV=1
A0A088ADH2	177.1	20	6	6	42493	Uncharacterized protein OS=Apis mellifera OX=7460 GN=LOC552452 PE=4 SV=1
A0A087ZZS7	175.95	20	6	5	46223	Uncharacterized protein OS=Apis mellifera OX=7460 GN=LOC409866 PE=4 SV=1
A0A088A5E3	175.47	20	4	4	42566	Uncharacterized protein OS=Apis mellifera OX=7460 GN=Vps26 PE=4 SV=1
A0A088A8G9	171.97	20	5	5	46508	Uncharacterized protein OS=Apis mellifera OX=7460 PE=4 SV=1
Q56TT0	170.51	20	4	4	26664	Cytochrome c oxidase subunit 2 OS=Apis mellifera OX=7460 GN=COX2 PE=3 SV=1
Q9G5H9	170.51	20	4	4	26650	Cytochrome c oxidase subunit 2 OS=Apis mellifera OX=7460 GN=COII PE=3 SV=1
A0A0S2LT58	170.51	20	4	4	26668	Cytochrome c oxidase subunit 2 OS=Apis mellifera OX=7460 GN=COX2 PE=3 SV=1
A0A291LR86	170.51	20	4	4	26636	Cytochrome c oxidase subunit 2 OS=Apis mellifera OX=7460 GN=COX2 PE=3 SV=1
A0A088AS25	170.24	20	6	6	43042	Uncharacterized protein OS=Apis mellifera OX=7460 PE=4 SV=1
A0A087ZWN5	166.73	20	5	5	29328	Uncharacterized protein OS=Apis mellifera OX=7460 GN=LOC413280 PE=4 SV=1
A0A088AF99	160.57	20	6	6	70443	Uncharacterized protein OS=Apis mellifera OX=7460 GN=LOC410616 PE=3 SV=1
A0A088A7S0	157.46	20	2	2	18832	Uncharacterized protein OS=Apis mellifera OX=7460 GN=102655896 PE=4 SV=1
A0A088AS52	154.84	20	5	5	34183	Uncharacterized protein OS=Apis mellifera OX=7460 GN=LOC411255 PE=4 SV=1
Q5W7P2	153.23	20	9	9	78674	Soluble guanylyl cyclase alpha 1 subunit OS=Apis mellifera OX=7460 GN=AmsGC alpha-1 PE=2 SV=1
A0A088AFT2	147.31	20	5	5	28896	40S ribosomal protein S6 OS=Apis mellifera OX=7460 GN=LOC725647 PE=3 SV=1
A0A087ZSJ2	146.46	20	4	4	34213	Uncharacterized protein OS=Apis mellifera OX=7460 PE=4 SV=1
A0A088AVV4	142.61	20	4	4	31190	Uncharacterized protein OS=Apis mellifera OX=7460 GN=LOC409668 PE=4 SV=1
A0A088A460	141.19	20	5	3	42345	Uncharacterized protein OS=Apis mellifera OX=7460 PE=3 SV=1
A0A088AH83	133.43	20	5	5	36279	Uncharacterized protein OS=Apis mellifera OX=7460 GN=LOC412678 PE=3 SV=1
A0A088AJ39	131.38	20	3	3	23363	Uncharacterized protein OS=Apis mellifera OX=7460 GN=RpL13A PE=3 SV=1
A0A088ATI4	131	20	3	3	24860	Eukaryotic translation initiation factor 3 subunit K OS=Apis mellifera OX=7460 GN=LOC551960 PE=3 SV=1
A0A088ATH7	128.65	20	4	4	25092	Uncharacterized protein OS=Apis mellifera OX=7460 GN=MsrA PE=3 SV=1
A0A088ASW2	126.6	20	2	2	32745	Uncharacterized protein OS=Apis mellifera OX=7460 GN=LOC551650 PE=4 SV=1
A0A088AMD2	125.87	20	2	2	16734	Uncharacterized protein OS=Apis mellifera OX=7460 GN=LOC726527 PE=4 SV=1
A0A088AFM0	125.79	20	5	5	36489	Uncharacterized protein OS=Apis mellifera OX=7460 PE=4 SV=1
A0A088AEY9	123.9	20	4	4	15526	Uncharacterized protein OS=Apis mellifera OX=7460 GN=LOC552807 PE=4 SV=1
A0A088A9A7	122.74	20	3	3	31717	Uncharacterized protein OS=Apis mellifera OX=7460 GN=LOC725594 PE=4 SV=1
A0A087ZTA3	118.25	20	4	4	36281	Uncharacterized protein OS=Apis mellifera OX=7460 GN=LOC411081 PE=4 SV=1
A0A087ZQI2	113.47	20	3	3	39041	Uncharacterized protein OS=Apis mellifera OX=7460 GN=727263 PE=4 SV=1
A0A088AM69	106.59	20	3	3	15195	Thioredoxin OS=Apis mellifera OX=7460 GN=Trx-1 PE=3 SV=1
A0A087ZQW0	104.55	20	3	3	31856	Uncharacterized protein OS=Apis mellifera OX=7460 GN=Tollip PE=4 SV=1
A0A087ZT47	103.15	20	2	2	28250	Uncharacterized protein OS=Apis mellifera OX=7460 PE=4 SV=1
A0A087ZY37	101.45	20	4	4	27376	Uncharacterized protein OS=Apis mellifera OX=7460 GN=100577876 PE=4 SV=1
A0A088ASZ3	100.05	20	3	3	14231	Uncharacterized protein OS=Apis mellifera OX=7460 GN=RpL31 PE=4 SV=1
A0A088ANQ5	95.94	20	3	3	23411	Uncharacterized protein OS=Apis mellifera OX=7460 GN=LOC552602 PE=3 SV=1
A0A088A3I9	94.08	20	5	5	41753	Uncharacterized protein OS=Apis mellifera OX=7460 GN=LOC409755 PE=4 SV=1
A0A088AF31	93.38	20	4	4	24664	Uncharacterized protein OS=Apis mellifera OX=7460 GN=LOC409318 PE=4 SV=1
A0A088AHM1	90.43	20	2	2	15552	Uncharacterized protein OS=Apis mellifera OX=7460 GN=100576945 PE=4 SV=1
A0A088ACJ5	90.16	20	4	4	33843	Uncharacterized protein OS=Apis mellifera OX=7460 GN=LOC409404 PE=4 SV=1
A0A088A287	90.08	20	4	4	37878	Uncharacterized protein OS=Apis mellifera OX=7460 PE=4 SV=1
A0A087ZQ43	88.91	20	3	3	17210	Uncharacterized protein OS=Apis mellifera OX=7460 GN=RpS13 PE=3 SV=1
A0A088AB23	88.41	20	1	1	8504	Uncharacterized protein OS=Apis mellifera OX=7460 PE=4 SV=1
A0A088AQM1	85.31	20	3	3	20496	Uncharacterized protein OS=Apis mellifera OX=7460 GN=Rheb PE=4 SV=1
P01501	74.28	20	1	1	7585	Melittin OS=Apis mellifera OX=7460 GN=MELT PE=1 SV=1
A0A088A041	72.36	20	2	2	13573	Small nuclear ribonucleoprotein Sm D1 OS=Apis mellifera OX=7460 GN=LOC552559 PE=3 SV=1
A0A088AF71	69.92	20	1	1	8083	Uncharacterized protein OS=Apis mellifera OX=7460 GN=LOC725202 PE=4 SV=1
A0A087ZT06	69.54	20	2	2	16154	Cytidine deaminase OS=Apis mellifera OX=7460 PE=3 SV=1
A0A088AN43	68.17	20	2	2	18784	Uncharacterized protein OS=Apis mellifera OX=7460 GN=102656131 PE=4 SV=1
A0A088ARZ9	66.82	20	2	2	20335	Uncharacterized protein OS=Apis mellifera OX=7460 GN=Rap2l PE=4 SV=1
A0A087ZT23	59.25	20	1	1	23120	Uncharacterized protein OS=Apis mellifera OX=7460 PE=4 SV=1
A0A088AUN0	54.16	20	1	1	13307	Uncharacterized protein OS=Apis mellifera OX=7460 PE=4 SV=1
A0A088AGJ1	52.51	20	2	2	9767	Uncharacterized protein OS=Apis mellifera OX=7460 GN=Atp5i PE=4 SV=1
A0A087ZNW4	51.49	20	1	1	12257	Uncharacterized protein OS=Apis mellifera OX=7460 PE=4 SV=1
A0A087ZTD7	49.26	20	1	1	6586	Uncharacterized protein OS=Apis mellifera OX=7460 GN=725147 PE=4 SV=1
A0A087ZXF4	35.36	20	1	1	14999	Uncharacterized protein OS=Apis mellifera OX=7460 GN=LOC724121 PE=4 SV=1
A0A088A4U9	26.87	20	1	1	9112	Uncharacterized protein OS=Apis mellifera OX=7460 PE=4 SV=1
A0A088AV13	304.31	21	18	18	171834	Uncharacterized protein OS=Apis mellifera OX=7460 PE=4 SV=1
A0A087ZWQ4	290.51	21	10	10	47354	Uncharacterized protein OS=Apis mellifera OX=7460 PE=4 SV=1
A0A087ZW55	285.16	21	9	9	38045	Uncharacterized protein OS=Apis mellifera OX=7460 PE=3 SV=1
A0A088AL93	271.65	21	6	6	61523	Uncharacterized protein OS=Apis mellifera OX=7460 PE=4 SV=1
A0A088A8E1	249.89	21	10	9	67159	Uncharacterized protein OS=Apis mellifera OX=7460 PE=4 SV=1
A0A088AF89	248.73	21	13	13	102513	Uncharacterized protein OS=Apis mellifera OX=7460 GN=alpha-Cat PE=4 SV=1
A0A087ZYP1	243.41	21	14	14	92302	Vacuolar protein sorting-associated protein 35 OS=Apis mellifera OX=7460 GN=Vps35 PE=3 SV=1
A0A088AAE5	237.85	21	11	11	81027	Uncharacterized protein OS=Apis mellifera OX=7460 GN=Cka PE=4 SV=1
A0A088A4K3	235.34	21	13	13	98814	Uncharacterized protein OS=Apis mellifera OX=7460 GN=LOC409485 PE=3 SV=1
A0A088AN33	232.57	21	10	10	65619	Uncharacterized protein OS=Apis mellifera OX=7460 GN=SCR-B6 PE=3 SV=1
A0A087ZPR9	228.93	21	5	5	37972	GMP reductase OS=Apis mellifera OX=7460 GN=LOC552316 PE=3 SV=1
A0A088A7H8	220.72	21	8	8	61210	Carboxylic ester hydrolase OS=Apis mellifera OX=7460 GN=LOC409171 PE=3 SV=1
A0A088A9R3	210.62	21	6	6	59024	Uncharacterized protein OS=Apis mellifera OX=7460 GN=LOC408904 PE=3 SV=1
A0A088A510	207.72	21	6	6	55451	Uncharacterized protein OS=Apis mellifera OX=7460 GN=tral PE=4 SV=1
A0A088ATI3	205.83	21	6	6	41257	Uncharacterized protein OS=Apis mellifera OX=7460 GN=LOC410080 PE=4 SV=1
A0A088ANG2	204.4	21	10	10	76296	Uncharacterized protein OS=Apis mellifera OX=7460 PE=4 SV=1
Q1MU16	197.4	21	12	12	110856	Uncharacterized protein OS=Apis mellifera OX=7460 GN=Ac3 PE=2 SV=1
A0A088ALY8	194.88	21	5	5	49667	Uncharacterized protein OS=Apis mellifera OX=7460 PE=4 SV=1
A0A088A825	193.9	21	4	4	23590	Histone H2B OS=Apis mellifera OX=7460 GN=LOC725238 PE=3 SV=1
A0A088A361	190.69	21	7	7	52487	Ubiquinone biosynthesis monooxygenase COQ6 mitochondrial OS=Apis mellifera OX=7460 GN=LOC412426 PE=3 SV=1
A0A088AM37	180.26	21	8	8	79432	Uncharacterized protein OS=Apis mellifera OX=7460 GN=LOC411591 PE=4 SV=1
A0A088AJ70	176.55	21	6	6	45482	Mitochondrial import inner membrane translocase subunit TIM50 OS=Apis mellifera OX=7460 GN=LOC408569 PE=3 SV=1
A0A088AJI1	171.78	21	7	7	58255	Uncharacterized protein OS=Apis mellifera OX=7460 GN=sn PE=4 SV=1
A0A088A7A0	170.01	21	5	5	42647	Uncharacterized protein OS=Apis mellifera OX=7460 PE=4 SV=1
A0A088ADU2	169.17	21	9	9	55703	Uncharacterized protein OS=Apis mellifera OX=7460 GN=Fuca PE=3 SV=1
A0A087ZNL6	168.69	21	8	8	60488	Uncharacterized protein OS=Apis mellifera OX=7460 PE=3 SV=1
Q17061	167.74	21	7	3	52916	Major royal jelly protein 4 OS=Apis mellifera OX=7460 GN=MRJP4 PE=1 SV=1
D3JXA7	167.74	21	7	3	53015	Major royal jelly protein 4 OS=Apis mellifera OX=7460 PE=2 SV=1
A0A087ZUN1	163.25	21	10	10	90363	Uncharacterized protein OS=Apis mellifera OX=7460 GN=LOC551437 PE=4 SV=1
A0A088AAD6	157.68	21	3	3	27290	Phosphatidylinositol-4 5-bisphosphate 4-phosphatase OS=Apis mellifera OX=7460 GN=LOC408301 PE=4 SV=1
A0A088A3I7	156.51	21	7	7	49329	Uncharacterized protein OS=Apis mellifera OX=7460 GN=Vps4 PE=3 SV=1
A0A088AMZ7	156.33	21	4	4	36409	Uncharacterized protein OS=Apis mellifera OX=7460 GN=LOC552336 PE=4 SV=1
A0A088A0N4	152.32	21	4	4	35580	Uncharacterized protein OS=Apis mellifera OX=7460 GN=Mtch PE=3 SV=1
A0A088A5F7	150.11	21	7	7	44319	Uncharacterized protein OS=Apis mellifera OX=7460 GN=LOC725740 PE=4 SV=1
A0A088ACX5	148.27	21	2	2	17926	Uncharacterized protein OS=Apis mellifera OX=7460 PE=4 SV=1
H9KEI2	148.05	21	5	5	17342	Uncharacterized protein OS=Apis mellifera OX=7460 GN=RpS19a PE=4 SV=1
A0A088ALP8	143.05	21	5	5	50711	Uncharacterized protein OS=Apis mellifera OX=7460 GN=LOC409092 PE=4 SV=1
A0A088AH97	141.15	21	5	5	42591	Uncharacterized protein OS=Apis mellifera OX=7460 PE=3 SV=1
A0A088AEC7	140.47	21	5	5	37744	Uncharacterized protein OS=Apis mellifera OX=7460 GN=Aos1 PE=4 SV=1
A0A088AJH7	140.34	21	5	5	36153	Uncharacterized protein OS=Apis mellifera OX=7460 PE=4 SV=1
A0A088A1R1	130.31	21	3	3	18926	Uncharacterized protein OS=Apis mellifera OX=7460 PE=4 SV=1
A0A087ZYI3	129.37	21	5	5	36157	Uncharacterized protein OS=Apis mellifera OX=7460 PE=3 SV=1
A0A088ABQ5	128.47	21	4	4	37209	Uncharacterized protein OS=Apis mellifera OX=7460 GN=100576795 PE=4 SV=1
A0A087ZTY8	127.09	21	4	4	39058	Uncharacterized protein OS=Apis mellifera OX=7460 GN=LOC551732 PE=4 SV=1
A0A087ZPI0	120.85	21	4	4	17509	Uncharacterized protein OS=Apis mellifera OX=7460 GN=RpL24 PE=4 SV=1
A0A087ZZ12	117.19	21	4	4	35916	Uncharacterized protein OS=Apis mellifera OX=7460 GN=Ppcs PE=4 SV=1
A0A087ZNQ4	116.64	21	4	4	43627	Uncharacterized protein OS=Apis mellifera OX=7460 PE=4 SV=1
A0A088AK13	111.43	21	3	3	24765	Uncharacterized protein OS=Apis mellifera OX=7460 GN=LOC413394 PE=3 SV=1
A0A088AN86	102.51	21	4	4	38741	Uncharacterized protein OS=Apis mellifera OX=7460 GN=CHORD PE=4 SV=1
A0A088AM30	102.26	21	3	3	10958	Uncharacterized protein OS=Apis mellifera OX=7460 GN=ATPsyn-Cf6 PE=4 SV=1
A0A087ZYQ5	101.89	21	4	4	33003	Uncharacterized protein OS=Apis mellifera OX=7460 PE=4 SV=1
A0A088A5S3	101.21	21	3	3	23790	Uncharacterized protein OS=Apis mellifera OX=7460 PE=4 SV=1
A0A088AJA4	99.78	21	3	3	26052	Probable methylthioribulose-1-phosphate dehydratase OS=Apis mellifera OX=7460 GN=LOC552014 PE=3 SV=1
A0A088AVY2	96.22	21	5	5	49633	Uncharacterized protein OS=Apis mellifera OX=7460 GN=Cbs PE=4 SV=1
A0A088A2Z3	82.83	21	2	2	12579	COX assembly mitochondrial protein OS=Apis mellifera OX=7460 GN=Ndufs5 PE=3 SV=1
[truncated: 1,161 more rows]

## Sheet: 3.2
Supplementary Data 3.2. Identification of proteins expressed in brains in conventionalized bees. Accession number is a unique identifer of a protein in the database of NCBI. The value of -10lgP is a conversion of P-value that all identified protein and peptide, which is greater than P<0.01 of FDR thresold. #Peptides are total peptide number assigned to the proteins. #Unique peptide is the number …
Accession	-10lgP	Coverage (%)	#Peptides	#Unique	Mass	Description
A0A088AQ61	82.02	1	2	2	325802	Uncharacterized protein OS=Apis mellifera OX=7460 GN=LOC726358 PE=4 SV=1
A0A088AN05	73.71	1	3	3	333131	Uncharacterized protein OS=Apis mellifera OX=7460 PE=4 SV=1
A0A088A3N0	66.3	1	1	1	116714	Uncharacterized protein OS=Apis mellifera OX=7460 PE=4 SV=1
A0A087ZUH3	64.23	1	2	2	352688	Uncharacterized protein OS=Apis mellifera OX=7460 PE=4 SV=1
A0A088AN13	63.08	1	1	1	194708	Uncharacterized protein OS=Apis mellifera OX=7460 PE=3 SV=1
A0A088A3U7	60.07	1	2	2	183346	Uncharacterized protein OS=Apis mellifera OX=7460 GN=LOC408551 PE=4 SV=1
A0A087ZPX1	58.99	1	1	1	92514	Uncharacterized protein OS=Apis mellifera OX=7460 GN=LOC409527 PE=4 SV=1
A0A087ZZ40	58.09	1	1	1	278080	Uncharacterized protein OS=Apis mellifera OX=7460 PE=4 SV=1
A0A087ZNZ3	56.53	1	2	2	192103	Uncharacterized protein OS=Apis mellifera OX=7460 GN=sec71 PE=4 SV=1
A0A088ACM6	56.06	1	1	1	162002	Uncharacterized protein OS=Apis mellifera OX=7460 GN=LOC551826 PE=4 SV=1
Q95YM8	55.02	1	1	1	174927	Mushroom body large-type Kenyon cell-specific protein 1 OS=Apis mellifera OX=7460 GN=Mblk-1 PE=1 SV=1
A0A088AF05	55.02	1	1	1	176265	Mushroom body large-type Kenyon cell-specific protein 1 OS=Apis mellifera OX=7460 PE=4 SV=1
A0A087ZWC1	55.01	1	2	2	219302	Uncharacterized protein OS=Apis mellifera OX=7460 GN=NUP205 PE=4 SV=1
A0A087ZPX7	54.3	1	2	2	414833	Uncharacterized protein OS=Apis mellifera OX=7460 PE=4 SV=1
A0A088AAC0	52	1	1	1	131038	Uncharacterized protein OS=Apis mellifera OX=7460 GN=LOC412607 PE=4 SV=1
A0A088AV24	50.55	1	1	1	161593	Uncharacterized protein OS=Apis mellifera OX=7460 PE=4 SV=1
A0A087ZMR5	49.94	1	1	1	231850	Uncharacterized protein OS=Apis mellifera OX=7460 PE=4 SV=1
A0A088AJ00	48.14	1	1	1	186678	Uncharacterized protein OS=Apis mellifera OX=7460 PE=4 SV=1
A0A088A0H9	48.07	1	1	1	213123	Uncharacterized protein OS=Apis mellifera OX=7460 GN=LOC725550 PE=4 SV=1
A0A088A3H9	47.78	1	2	2	237682	Uncharacterized protein OS=Apis mellifera OX=7460 GN=LOC552502 PE=4 SV=1
A0A088AVR1	47.09	1	1	1	100667	Uncharacterized protein OS=Apis mellifera OX=7460 PE=4 SV=1
A0A088ACI4	46.42	1	1	1	137780	Uncharacterized protein OS=Apis mellifera OX=7460 GN=LOC409856 PE=4 SV=1
A0A087ZZC9	45.34	1	1	1	252356	Uncharacterized protein OS=Apis mellifera OX=7460 GN=LOC409107 PE=4 SV=1
A0A087ZPN1	44.59	1	1	1	103948	Uncharacterized protein OS=Apis mellifera OX=7460 GN=LOC412326 PE=4 SV=1
A0A088AKS6	44.37	1	1	1	179940	Uncharacterized protein OS=Apis mellifera OX=7460 PE=4 SV=1
A0A087ZVG7	44.34	1	1	1	114221	Uncharacterized protein OS=Apis mellifera OX=7460 PE=4 SV=1
A0A087ZU47	44.05	1	2	2	475170	Uncharacterized protein OS=Apis mellifera OX=7460 PE=4 SV=1
A0A088ACE4	43.22	1	1	1	164223	Uncharacterized protein OS=Apis mellifera OX=7460 GN=Nup214 PE=4 SV=1
A0A088A9P7	43.18	1	2	2	356105	Uncharacterized protein OS=Apis mellifera OX=7460 PE=4 SV=1
A0A087ZV77	43.06	1	1	1	178412	Uncharacterized protein OS=Apis mellifera OX=7460 PE=4 SV=1
A0A088A7H9	42	1	1	1	139609	Uncharacterized protein OS=Apis mellifera OX=7460 PE=4 SV=1
A0A088A0S1	41.95	1	1	1	98664	Uncharacterized protein OS=Apis mellifera OX=7460 GN=100578631 PE=4 SV=1
A0A088AFA9	41.8	1	1	1	121806	Uncharacterized protein OS=Apis mellifera OX=7460 PE=3 SV=1
A0A087ZVG3	40.93	1	1	1	158525	Uncharacterized protein OS=Apis mellifera OX=7460 PE=4 SV=1
A0A087ZNP6	39.56	1	1	1	153716	Uncharacterized protein OS=Apis mellifera OX=7460 GN=LOC412128 PE=4 SV=1
A0A088AE00	39.36	1	1	1	135351	Uncharacterized protein OS=Apis mellifera OX=7460 GN=LIMK1 PE=4 SV=1
A0A087ZSL6	39.26	1	1	1	128636	Uncharacterized protein OS=Apis mellifera OX=7460 GN=NRD1 PE=3 SV=1
A0A087ZPX3	39.04	1	1	1	63419	Uncharacterized protein OS=Apis mellifera OX=7460 PE=4 SV=1
A0A088ARQ8	38.85	1	1	1	290058	Uncharacterized protein OS=Apis mellifera OX=7460 PE=4 SV=1
A0A088ABM8	38.79	1	1	1	229253	Uncharacterized protein OS=Apis mellifera OX=7460 PE=4 SV=1
A0A088AJ03	38.38	1	1	1	85749	Uncharacterized protein OS=Apis mellifera OX=7460 PE=4 SV=1
A0A087ZYG6	38.19	1	1	1	166498	Uncharacterized protein OS=Apis mellifera OX=7460 GN=LOC727447 PE=4 SV=1
A0A088AJP8	38.13	1	1	1	111715	Uncharacterized protein OS=Apis mellifera OX=7460 GN=LOC411237 PE=4 SV=1
A0A088AFX0	37.79	1	1	1	115742	Uncharacterized protein OS=Apis mellifera OX=7460 PE=4 SV=1
A0A088AGM4	37.73	1	1	1	164421	DNA topoisomerase 2 OS=Apis mellifera OX=7460 PE=3 SV=1
A0A088A9B2	37.58	1	1	1	122279	Uncharacterized protein OS=Apis mellifera OX=7460 GN=LOC411750 PE=4 SV=1
A0A088ASB5	36.98	1	1	1	101567	Uncharacterized protein OS=Apis mellifera OX=7460 PE=4 SV=1
A0A087ZQ39	36.74	1	1	1	169065	Uncharacterized protein OS=Apis mellifera OX=7460 GN=LOC409283 PE=4 SV=1
A0A087ZU14	36.74	1	1	1	111499	Aminopeptidase OS=Apis mellifera OX=7460 GN=LOC412263 PE=3 SV=1
A0A088ANK6	36.59	1	1	1	110109	Uncharacterized protein OS=Apis mellifera OX=7460 PE=4 SV=1
A0A088A5N2	36.57	1	1	1	316855	Uncharacterized protein OS=Apis mellifera OX=7460 PE=4 SV=1
A0A087ZXA9	36.21	1	1	1	121604	Uncharacterized protein OS=Apis mellifera OX=7460 PE=4 SV=1
A0A088AUU1	36.04	1	1	1	116178	Uncharacterized protein OS=Apis mellifera OX=7460 GN=Ipo9 PE=4 SV=1
A0A088A776	35.39	1	1	1	96180	Chloride channel protein OS=Apis mellifera OX=7460 PE=3 SV=1
A0A088AQN9	35.1	1	1	1	195330	Uncharacterized protein OS=Apis mellifera OX=7460 PE=3 SV=1
A0A088AS21	35.06	1	1	1	154382	Uncharacterized protein OS=Apis mellifera OX=7460 PE=4 SV=1
A0A087ZWW8	34.15	1	1	1	95055	Uncharacterized protein OS=Apis mellifera OX=7460 GN=LOC725192 PE=4 SV=1
A0A088ATC8	33.8	1	1	1	96574	Uncharacterized protein OS=Apis mellifera OX=7460 PE=4 SV=1
A0A088AD66	33.72	1	1	1	136815	Uncharacterized protein OS=Apis mellifera OX=7460 PE=4 SV=1
A0A088AVM7	33.68	1	1	1	143566	Uncharacterized protein OS=Apis mellifera OX=7460 PE=4 SV=1
A0A087ZQF3	33.68	1	1	1	107448	Uncharacterized protein OS=Apis mellifera OX=7460 PE=4 SV=1
A0A088ABZ9	33.58	1	1	1	74054	Uncharacterized protein OS=Apis mellifera OX=7460 GN=casp PE=4 SV=1
A0A088AAC7	33.49	1	1	1	129873	Uncharacterized protein OS=Apis mellifera OX=7460 PE=4 SV=1
A0A088AIZ8	33.47	1	1	1	117277	Uncharacterized protein OS=Apis mellifera OX=7460 PE=4 SV=1
A0A088A5Z1	32.92	1	1	1	109782	Uncharacterized protein OS=Apis mellifera OX=7460 PE=4 SV=1
A0A088AUY7	32.9	1	1	1	176087	Uncharacterized protein OS=Apis mellifera OX=7460 PE=4 SV=1
A0A088AAU9	32.84	1	1	1	308542	Uncharacterized protein OS=Apis mellifera OX=7460 PE=4 SV=1
A0A088AHS9	32.73	1	1	1	82992	Uncharacterized protein OS=Apis mellifera OX=7460 GN=ttv PE=3 SV=1
A0A088AGY7	32.38	1	1	1	163549	Uncharacterized protein OS=Apis mellifera OX=7460 GN=LOC411955 PE=4 SV=1
A0A087ZS98	32.13	1	1	1	206556	Uncharacterized protein OS=Apis mellifera OX=7460 PE=4 SV=1
A0A087ZR29	31.76	1	1	1	108000	Trifunctional purine biosynthetic protein adenosine-3 OS=Apis mellifera OX=7460 PE=3 SV=1
A0A088AAN0	31.6	1	1	1	81805	Uncharacterized protein OS=Apis mellifera OX=7460 GN=LOC413702 PE=4 SV=1
A0A087ZUU9	31.57	1	1	1	297776	Uncharacterized protein OS=Apis mellifera OX=7460 PE=4 SV=1
A0A088AQK7	31.54	1	1	1	253898	Uncharacterized protein OS=Apis mellifera OX=7460 PE=4 SV=1
A0A088ALG5	31.47	1	1	1	121344	Odorant receptor OS=Apis mellifera OX=7460 PE=4 SV=1
A0A088AVL1	31.1	1	1	1	125231	Uncharacterized protein OS=Apis mellifera OX=7460 GN=gry PE=4 SV=1
A0A088AI67	30.84	1	1	1	102316	Uncharacterized protein OS=Apis mellifera OX=7460 PE=4 SV=1
A0A088AB63	30.72	1	1	1	143427	Uncharacterized protein OS=Apis mellifera OX=7460 PE=4 SV=1
A0A088A3N8	30.54	1	1	1	148484	Uncharacterized protein OS=Apis mellifera OX=7460 PE=4 SV=1
A0A087ZYS8	30.3	1	1	1	127873	Phospholipid-transporting ATPase OS=Apis mellifera OX=7460 PE=3 SV=1
A0A088A8E3	30.2	1	1	1	432727	Uncharacterized protein OS=Apis mellifera OX=7460 PE=4 SV=1
A0A088AVK6	30.16	1	1	1	129399	Uncharacterized protein OS=Apis mellifera OX=7460 GN=RabGAP12 PE=4 SV=1
A0A088AE72	29.63	1	1	1	175967	Uncharacterized protein OS=Apis mellifera OX=7460 GN=LOC410867 PE=4 SV=1
A0A088AJA1	29.41	1	1	1	121415	CIRL OS=Apis mellifera OX=7460 PE=3 SV=1
A0A087ZV60	29.21	1	1	1	214707	Uncharacterized protein OS=Apis mellifera OX=7460 PE=4 SV=1
A0A087ZUC3	29.16	1	1	1	78222	Protein arginine N-methyltransferase OS=Apis mellifera OX=7460 PE=3 SV=1
A0A088AJS4	29.14	1	1	1	192521	Uncharacterized protein OS=Apis mellifera OX=7460 PE=4 SV=1
A0A088APN8	29.03	1	1	1	119745	Uncharacterized protein OS=Apis mellifera OX=7460 GN=LOC413510 PE=4 SV=1
A0A088A4H6	28.97	1	1	1	104192	Uncharacterized protein OS=Apis mellifera OX=7460 GN=411958 PE=3 SV=1
A0A088A3R1	28.65	1	1	1	177123	Uncharacterized protein OS=Apis mellifera OX=7460 GN=Gmap PE=4 SV=1
A0A088AFZ4	28.63	1	1	1	148539	Uncharacterized protein OS=Apis mellifera OX=7460 PE=4 SV=1
A0A088AW73	28.57	1	1	1	186514	Uncharacterized protein OS=Apis mellifera OX=7460 PE=4 SV=1
A0A087ZZD7	28.5	1	1	1	80688	Transporter OS=Apis mellifera OX=7460 GN=NT-6 PE=3 SV=1
A0A088AAX4	28.35	1	1	1	195339	DNA-directed RNA polymerase subunit OS=Apis mellifera OX=7460 GN=RpI1 PE=3 SV=1
A0A088AF50	28.33	1	1	1	110364	Uncharacterized protein OS=Apis mellifera OX=7460 GN=Mms19 PE=4 SV=1
A0A088A8T4	28.3	1	1	1	129281	Uncharacterized protein OS=Apis mellifera OX=7460 PE=4 SV=1
A0A087ZNZ4	28	1	1	1	101279	Uncharacterized protein OS=Apis mellifera OX=7460 GN=LOC411881 PE=4 SV=1
A0A088AVW8	27.72	1	1	1	212652	Uncharacterized protein OS=Apis mellifera OX=7460 PE=3 SV=1
A0A088AHD5	27.71	1	1	1	108639	Phosphodiesterase OS=Apis mellifera OX=7460 GN=100577138 PE=3 SV=1
A0A088A4P3	27.14	1	1	1	72677	Uncharacterized protein OS=Apis mellifera OX=7460 GN=EDTP PE=4 SV=1
B9VMQ6	27.1	1	1	1	90895	Neuroligin 4 OS=Apis mellifera OX=7460 PE=2 SV=1
A0A087ZY87	27.08	1	1	1	241076	Uncharacterized protein OS=Apis mellifera OX=7460 GN=LOC726339 PE=4 SV=1
A0A088A378	27.06	1	1	1	124818	Uncharacterized protein OS=Apis mellifera OX=7460 GN=LOC410097 PE=4 SV=1
A0A087ZU53	26.99	1	1	1	92146	Uncharacterized protein OS=Apis mellifera OX=7460 PE=4 SV=1
A0A088ACX9	26.75	1	1	1	123825	Uncharacterized protein OS=Apis mellifera OX=7460 GN=mew PE=3 SV=1
A0A088AV90	26.73	1	1	1	138907	Uncharacterized protein OS=Apis mellifera OX=7460 GN=LOC409221 PE=4 SV=1
A0A088AGA1	140.46	2	4	4	280271	Uncharacterized protein OS=Apis mellifera OX=7460 PE=4 SV=1
A0A088AK76	121.35	2	7	7	605044	Uncharacterized protein OS=Apis mellifera OX=7460 GN=LOC412281 PE=4 SV=1
A0A087ZZB0	119.93	2	5	5	478140	Uncharacterized protein OS=Apis mellifera OX=7460 PE=4 SV=1
A0A088AK33	119.5	2	3	3	287950	Uncharacterized protein OS=Apis mellifera OX=7460 PE=4 SV=1
A0A088A113	118.01	2	3	3	228654	Uncharacterized protein OS=Apis mellifera OX=7460 GN=osa PE=4 SV=1
A0A088AFN5	104.34	2	2	2	202258	Uncharacterized protein OS=Apis mellifera OX=7460 PE=4 SV=1
A0A087ZX89	91.76	2	3	3	189967	Uncharacterized protein OS=Apis mellifera OX=7460 PE=4 SV=1
A0A088A7U5	85.15	2	2	2	195498	Uncharacterized protein OS=Apis mellifera OX=7460 GN=MAST2 PE=4 SV=1
A0A088AUQ4	84.57	2	1	1	106256	Uncharacterized protein OS=Apis mellifera OX=7460 PE=4 SV=1
A0A088AM47	83.99	2	2	2	152223	Diacylglycerol kinase OS=Apis mellifera OX=7460 PE=3 SV=1
A0A087ZPR6	82.77	2	1	1	105022	Uncharacterized protein OS=Apis mellifera OX=7460 GN=Rnp4F PE=4 SV=1
A0A087ZVU4	81.12	2	3	3	295114	Uncharacterized protein OS=Apis mellifera OX=7460 PE=4 SV=1
A0A088AH85	80.7	2	2	2	230028	Uncharacterized protein OS=Apis mellifera OX=7460 GN=Sbf PE=4 SV=1
A0A088ASI7	78.9	2	3	3	343519	Uncharacterized protein OS=Apis mellifera OX=7460 GN=LOC725503 PE=4 SV=1
A0A088AHR2	77.18	2	2	2	137460	Uncharacterized protein OS=Apis mellifera OX=7460 PE=4 SV=1
A0A088A1V8	76.44	2	2	2	161261	Uncharacterized protein OS=Apis mellifera OX=7460 GN=Sara PE=4 SV=1
A0A087ZNQ7	71.9	2	2	2	138688	Uncharacterized protein OS=Apis mellifera OX=7460 GN=LOC551462 PE=4 SV=1
A0A088AEY8	70.98	2	1	1	106908	Uncharacterized protein OS=Apis mellifera OX=7460 PE=4 SV=1
A0A087ZYD0	69.67	2	2	2	140858	Uncharacterized protein OS=Apis mellifera OX=7460 PE=4 SV=1
A0A087ZPE3	69.5	2	1	1	63150	Uncharacterized protein OS=Apis mellifera OX=7460 GN=102653922 PE=4 SV=1
A0A087ZX42	68.16	2	2	2	156865	Tyrosine-protein kinase receptor OS=Apis mellifera OX=7460 PE=3 SV=1
A0A087ZMT4	67.12	2	2	2	137269	Uncharacterized protein OS=Apis mellifera OX=7460 PE=4 SV=1
A0A088A128	66.68	2	2	2	118708	Uncharacterized protein OS=Apis mellifera OX=7460 PE=4 SV=1
A0A088AAF9	66.09	2	1	1	65156	Uncharacterized protein OS=Apis mellifera OX=7460 PE=4 SV=1
A0A087ZVG4	64.95	2	1	1	93599	Uncharacterized protein OS=Apis mellifera OX=7460 GN=LOC409279 PE=3 SV=1
A0A088A887	62.53	2	2	2	164160	Uncharacterized protein OS=Apis mellifera OX=7460 GN=LOC725118 PE=4 SV=1
A0A087ZZ79	61.95	2	1	1	117879	Alpha-mannosidase OS=Apis mellifera OX=7460 PE=3 SV=1
A0A088ADJ1	61.69	2	3	3	172561	Uncharacterized protein OS=Apis mellifera OX=7460 PE=4 SV=1
A0A087ZZH2	61.36	2	2	2	137057	Uncharacterized protein OS=Apis mellifera OX=7460 GN=Tf PE=4 SV=1
A0A088A280	60.86	2	1	1	91500	Uncharacterized protein OS=Apis mellifera OX=7460 GN=LOC413046 PE=4 SV=1
A0A088ALU8	60.1	2	1	1	78932	Uncharacterized protein OS=Apis mellifera OX=7460 GN=LOC551163 PE=4 SV=1
Q75QW7	59.87	2	1	1	103467	Metabotropic glutamate receptor OS=Apis mellifera OX=7460 GN=AmGluRA PE=2 SV=1
A0A088A175	59.87	2	1	1	101683	Uncharacterized protein OS=Apis mellifera OX=7460 PE=3 SV=1
A0A088AHQ3	58.46	2	2	2	183063	Uncharacterized protein OS=Apis mellifera OX=7460 GN=LOC409743 PE=4 SV=1
A0A088AFJ4	58.38	2	1	1	86938	Uncharacterized protein OS=Apis mellifera OX=7460 PE=4 SV=1
A0A087ZQ54	57.16	2	2	2	162570	Uncharacterized protein OS=Apis mellifera OX=7460 PE=4 SV=1
A0A088AAV1	56.07	2	1	1	89399	Uncharacterized protein OS=Apis mellifera OX=7460 GN=725599 PE=4 SV=1
A0A088AFE1	55.77	2	1	1	98294	Uncharacterized protein OS=Apis mellifera OX=7460 GN=wfs1 PE=4 SV=1
A0A088AJD6	55.75	2	1	1	92604	Uncharacterized protein OS=Apis mellifera OX=7460 PE=4 SV=1
A0A088AQL3	53.4	2	2	2	165490	Uncharacterized protein OS=Apis mellifera OX=7460 GN=lqfR PE=4 SV=1
A0A088ATM7	53.08	2	1	1	93003	Uncharacterized protein OS=Apis mellifera OX=7460 GN=SPATA20 PE=4 SV=1
A0A088AQ74	53.08	2	2	2	131323	Uncharacterized protein OS=Apis mellifera OX=7460 GN=726210 PE=4 SV=1
A0A088ACS1	52.3	2	2	2	140263	Uncharacterized protein OS=Apis mellifera OX=7460 PE=3 SV=1
A0A088AU05	52.27	2	1	1	144997	Uncharacterized protein OS=Apis mellifera OX=7460 PE=4 SV=1
A0A088A5W0	50.89	2	1	1	152410	Uncharacterized protein OS=Apis mellifera OX=7460 PE=4 SV=1
A0A088ATJ5	50.63	2	2	2	173246	Uncharacterized protein OS=Apis mellifera OX=7460 PE=4 SV=1
C9D7C5	49.27	2	2	2	232255	Sodium channel protein OS=Apis mellifera OX=7460 GN=PARA PE=2 SV=1
A0A087ZV49	49.27	2	2	2	236832	Sodium channel protein OS=Apis mellifera OX=7460 PE=3 SV=1
A0A088A6X9	48.76	2	2	2	155778	Guanylate cyclase OS=Apis mellifera OX=7460 PE=4 SV=1
A0A088A6I0	48.67	2	1	1	72224	Uncharacterized protein OS=Apis mellifera OX=7460 GN=LOC412459 PE=4 SV=1
A0A088A0P3	47.82	2	1	1	60273	Uncharacterized protein OS=Apis mellifera OX=7460 GN=WASp PE=4 SV=1
A0A088ACG3	47.79	2	1	1	122033	Uncharacterized protein OS=Apis mellifera OX=7460 PE=4 SV=1
A0A088ARI8	47.46	2	1	1	95662	Uncharacterized protein OS=Apis mellifera OX=7460 PE=4 SV=1
A0A088AAX9	47.31	2	1	1	56969	Uncharacterized protein OS=Apis mellifera OX=7460 PE=4 SV=1
A0A087ZPJ9	47.29	2	1	1	98039	Uncharacterized protein OS=Apis mellifera OX=7460 PE=4 SV=1
A0A087ZWC3	46.51	2	1	1	105109	Uncharacterized protein OS=Apis mellifera OX=7460 GN=LOC551493 PE=4 SV=1
A0A088A018	46.39	2	2	2	147657	Uncharacterized protein OS=Apis mellifera OX=7460 PE=3 SV=1
A0A088A7Y6	46.37	2	1	1	111573	Uncharacterized protein OS=Apis mellifera OX=7460 GN=LOC552221 PE=4 SV=1
A0A088AUH0	46.22	2	1	1	122057	Uncharacterized protein OS=Apis mellifera OX=7460 PE=4 SV=1
A0A088AR88	46.06	2	1	1	67290	Uncharacterized protein OS=Apis mellifera OX=7460 PE=3 SV=1
A0A088A4B0	45.32	2	1	1	85492	Uncharacterized protein OS=Apis mellifera OX=7460 PE=4 SV=1
A0A088AES2	45	2	1	1	108349	Uncharacterized protein OS=Apis mellifera OX=7460 GN=LOC408507 PE=4 SV=1
A0A088AK15	44.54	2	1	1	69876	Uncharacterized protein OS=Apis mellifera OX=7460 PE=4 SV=1
A0A088ADG3	44.5	2	1	1	93741	Uncharacterized protein OS=Apis mellifera OX=7460 GN=LOC411730 PE=4 SV=1
A0A087ZX61	42.7	2	2	2	165496	Uncharacterized protein OS=Apis mellifera OX=7460 GN=LOC412143 PE=4 SV=1
A0A087ZRT3	42.68	2	1	1	71394	Uncharacterized protein OS=Apis mellifera OX=7460 PE=4 SV=1
A0A088A4L7	42.58	2	1	1	71432	Signal recognition particle subunit SRP72 OS=Apis mellifera OX=7460 PE=3 SV=1
A0A088A2F1	42.52	2	1	1	55060	Uncharacterized protein OS=Apis mellifera OX=7460 PE=4 SV=1
A0A088AD09	42.35	2	1	1	72109	Uncharacterized protein OS=Apis mellifera OX=7460 GN=nct PE=4 SV=1
A0A088AAG3	42.2	2	1	1	87127	Probable lysine-specific histone demethylase 1 OS=Apis mellifera OX=7460 GN=Su(var)3-3 PE=3 SV=1
A0EIZ8	42.13	2	1	1	59810	Nicotinic acetylcholine receptor beta1 subunit OS=Apis mellifera OX=7460 GN=nAChRb1 PE=2 SV=1
A0A087ZUF4	41.94	2	1	1	46715	Uncharacterized protein OS=Apis mellifera OX=7460 GN=LOC551879 PE=4 SV=1
A0A0H3V199	41.34	2	1	1	62511	Nicotinic acetylcholine receptor alpha7 subunit OS=Apis mellifera OX=7460 GN=nAChRalpha7 PE=2 SV=1
Q6RFT1	41.34	2	1	1	62481	Neuronal nicotinic acetylcholine receptor alpha7-1 OS=Apis mellifera OX=7460 PE=2 SV=1
A0A088A2Q3	41.26	2	1	1	78242	Exocyst complex component 7 OS=Apis mellifera OX=7460 GN=551576 PE=3 SV=1
A0A088AUB4	41.26	2	1	1	105803	Uncharacterized protein OS=Apis mellifera OX=7460 PE=4 SV=1
A0A087ZZ06	41.13	2	1	1	101760	Uncharacterized protein OS=Apis mellifera OX=7460 PE=4 SV=1
A0A088AF57	40.67	2	1	1	89465	Uncharacterized protein OS=Apis mellifera OX=7460 GN=LOC409666 PE=4 SV=1
A0A088APW1	40.03	2	1	1	159834	Clustered mitochondria protein homolog OS=Apis mellifera OX=7460 GN=LOC552519 PE=3 SV=1
A0A088AEK4	39.67	2	1	1	57177	Cytochrome P450 monooxygenase OS=Apis mellifera OX=7460 PE=4 SV=1
Q309A5	39.67	2	1	1	57974	Cytochrome P450 monooxygenase OS=Apis mellifera OX=7460 GN=CYP6AS5 PE=2 SV=1
A0A088A0C0	38.91	2	1	1	101542	Uncharacterized protein OS=Apis mellifera OX=7460 PE=4 SV=1
D9MX52	38.83	2	1	1	62077	Fatty acyl-CoA reductase OS=Apis mellifera OX=7460 GN=LOC411983 PE=2 SV=1
A0A087ZSI4	38.67	2	1	1	40365	Uncharacterized protein OS=Apis mellifera OX=7460 PE=4 SV=1
A0A088A0Z7	38.49	2	1	1	75745	Uncharacterized protein OS=Apis mellifera OX=7460 GN=bun PE=4 SV=1
A0A088AMR2	38.25	2	1	1	70851	Uncharacterized protein OS=Apis mellifera OX=7460 PE=4 SV=1
A0A088A791	38.04	2	1	1	127879	Uncharacterized protein OS=Apis mellifera OX=7460 PE=4 SV=1
A0A088A1T9	37.8	2	1	1	116970	Uncharacterized protein OS=Apis mellifera OX=7460 PE=4 SV=1
A0A087ZU42	37.69	2	1	1	64426	Uncharacterized protein OS=Apis mellifera OX=7460 GN=LOC411141 PE=4 SV=1
A0A088ATG8	37.28	2	1	1	157864	Uncharacterized protein OS=Apis mellifera OX=7460 GN=100578506 PE=3 SV=1
A0A088A8E8	37.1	2	1	1	94097	Serine/threonine-protein kinase OS=Apis mellifera OX=7460 GN=PKD PE=3 SV=1
A0A088A4K4	36.95	2	1	1	80548	Transferrin OS=Apis mellifera OX=7460 PE=3 SV=1
A0A088AM85	36.56	2	1	1	111476	Chloride channel protein OS=Apis mellifera OX=7460 GN=LOC408467 PE=3 SV=1
A0A088AK17	36.26	2	1	1	143405	Uncharacterized protein OS=Apis mellifera OX=7460 GN=LOC413388 PE=4 SV=1
A0A088AIW2	36.23	2	1	1	98493	Uncharacterized protein OS=Apis mellifera OX=7460 PE=4 SV=1
A0A088APX1	36.15	2	1	1	59327	Uncharacterized protein OS=Apis mellifera OX=7460 PE=4 SV=1
A0A088AJM3	35.85	2	1	1	150861	Uncharacterized protein OS=Apis mellifera OX=7460 PE=4 SV=1
A0A088A5G2	35.74	2	1	1	97012	Uncharacterized protein OS=Apis mellifera OX=7460 PE=4 SV=1
A0A087ZY59	35.4	2	1	1	76918	Uncharacterized protein OS=Apis mellifera OX=7460 GN=LOC552495 PE=4 SV=1
A0A088A1Z5	35.23	2	1	1	73030	Uncharacterized protein OS=Apis mellifera OX=7460 GN=ABC10 PE=4 SV=1
A0A088A727	35.21	2	1	1	54826	Uncharacterized protein OS=Apis mellifera OX=7460 PE=4 SV=1
A0A088A327	35	2	1	1	76237	Uncharacterized protein OS=Apis mellifera OX=7460 GN=Stim PE=4 SV=1
A0A087ZZC1	34.81	2	1	1	72199	Uncharacterized protein OS=Apis mellifera OX=7460 GN=LOC411212 PE=4 SV=1
A0A088A8H3	34.73	2	1	1	55934	Uncharacterized protein OS=Apis mellifera OX=7460 GN=LOC412925 PE=4 SV=1
A0A087ZTT2	34.66	2	1	1	109006	Uncharacterized protein OS=Apis mellifera OX=7460 GN=LOC724497 PE=4 SV=1
A0A088A819	34.58	2	1	1	96271	Uncharacterized protein OS=Apis mellifera OX=7460 PE=4 SV=1
A0A087ZR84	34.52	2	1	1	65407	Uncharacterized protein OS=Apis mellifera OX=7460 GN=LOC551314 PE=4 SV=1
A0A088AJC0	34.49	2	1	1	80330	Uncharacterized protein OS=Apis mellifera OX=7460 PE=4 SV=1
A0A087ZUX9	34.4	2	1	1	79895	Uncharacterized protein OS=Apis mellifera OX=7460 PE=3 SV=1
A0A088AFS2	34.16	2	1	1	84154	Uncharacterized protein OS=Apis mellifera OX=7460 PE=4 SV=1
A0A087ZRE2	34.06	2	1	1	86224	Uncharacterized protein OS=Apis mellifera OX=7460 PE=4 SV=1
A0A087ZT79	33.84	2	1	1	78112	Uncharacterized protein OS=Apis mellifera OX=7460 PE=4 SV=1
A0A088ART6	33.66	2	1	1	53311	Uncharacterized protein OS=Apis mellifera OX=7460 GN=LOC409424 PE=3 SV=1
A0A087ZRM0	33.65	2	1	1	39892	Uncharacterized protein OS=Apis mellifera OX=7460 GN=tsl PE=4 SV=1
A0A088AT35	33.62	2	1	1	35918	Uncharacterized protein OS=Apis mellifera OX=7460 GN=LOC725816 PE=4 SV=1
A0A088A3P0	33.61	2	1	1	55087	Uncharacterized protein OS=Apis mellifera OX=7460 PE=4 SV=1
A0A088ABI6	33.38	2	1	1	68110	Uncharacterized protein OS=Apis mellifera OX=7460 PE=3 SV=1
A0A088ATC6	33.26	2	1	1	40673	Uncharacterized protein OS=Apis mellifera OX=7460 GN=LOC552660 PE=3 SV=1
A0A087ZZA2	32.45	2	1	1	76424	Uncharacterized protein OS=Apis mellifera OX=7460 PE=4 SV=1
A0A088AP45	32.43	2	1	1	69310	Uncharacterized protein OS=Apis mellifera OX=7460 GN=Gtp-bp PE=4 SV=1
A0A087ZQ65	32.39	2	1	1	73251	Uncharacterized protein OS=Apis mellifera OX=7460 PE=4 SV=1
A0A088ADM4	31.94	2	1	1	62971	Uncharacterized protein OS=Apis mellifera OX=7460 GN=LOC724738 PE=4 SV=1
A0A087ZQD7	31.87	2	1	1	87108	Uncharacterized protein OS=Apis mellifera OX=7460 PE=3 SV=1
A0A088A4B6	31.8	2	1	1	76289	Uncharacterized protein OS=Apis mellifera OX=7460 PE=4 SV=1
A0A088A818	31.69	2	1	1	69065	Uncharacterized protein OS=Apis mellifera OX=7460 GN=100576435 PE=4 SV=1
A0A088A7G6	31.63	2	1	1	98519	Putative rRNA methyltransferase OS=Apis mellifera OX=7460 GN=107963983 PE=3 SV=1
A0A088AJV2	31.44	2	1	1	71645	Uncharacterized protein OS=Apis mellifera OX=7460 GN=GMCOX9 PE=4 SV=1
A0A088AJE5	31.42	2	1	1	76553	Uncharacterized protein OS=Apis mellifera OX=7460 PE=4 SV=1
A0A088AVP1	31.06	2	1	1	59441	Uncharacterized protein OS=Apis mellifera OX=7460 PE=4 SV=1
A0A088A301	30.85	2	1	1	76331	Uncharacterized protein OS=Apis mellifera OX=7460 GN=Gga PE=4 SV=1
A0A088AC85	30.79	2	1	1	109463	Uncharacterized protein OS=Apis mellifera OX=7460 PE=4 SV=1
A0A088AHH3	30.67	2	1	1	50464	Uncharacterized protein OS=Apis mellifera OX=7460 GN=LOC408283 PE=4 SV=1
A0A088AUL6	30.44	2	1	1	67705	Uncharacterized protein OS=Apis mellifera OX=7460 GN=LOC410816 PE=4 SV=1
A0A088AC23	29.92	2	1	1	59273	Uncharacterized protein OS=Apis mellifera OX=7460 PE=4 SV=1
A0A088A0G5	29.88	2	1	1	67703	Uncharacterized protein OS=Apis mellifera OX=7460 GN=100576667 PE=4 SV=1
J7EQE2	29.41	2	1	1	92351	CIRL OS=Apis mellifera OX=7460 PE=3 SV=1
A0A088AJ46	29.24	2	1	1	82200	Uncharacterized protein OS=Apis mellifera OX=7460 PE=4 SV=1
A0A088AKG2	29.22	2	1	1	65688	Carboxylic ester hydrolase OS=Apis mellifera OX=7460 GN=LOC408395 PE=3 SV=1
A0A088A2H6	28.79	2	1	1	47268	Uncharacterized protein OS=Apis mellifera OX=7460 GN=LOC552520 PE=3 SV=1
A0A088AII6	28.74	2	1	1	68912	Uncharacterized protein OS=Apis mellifera OX=7460 GN=LOC412084 PE=4 SV=1
A0A088AFU5	28.7	2	1	1	64609	Uncharacterized protein OS=Apis mellifera OX=7460 PE=4 SV=1
A0A088A1J6	28.45	2	1	1	83169	Uncharacterized protein OS=Apis mellifera OX=7460 PE=4 SV=1
A0A088APP1	28.43	2	1	1	67620	Uncharacterized protein OS=Apis mellifera OX=7460 PE=3 SV=1
A0A087ZVD6	28.38	2	1	1	85124	Uncharacterized protein OS=Apis mellifera OX=7460 GN=LOC409310 PE=4 SV=1
A0A087ZVY2	28.13	2	1	1	137414	Uncharacterized protein OS=Apis mellifera OX=7460 PE=4 SV=1
A0A088AH43	28.11	2	1	1	73829	Uncharacterized protein OS=Apis mellifera OX=7460 GN=LOC724424 PE=4 SV=1
A0A087ZU55	28.01	2	1	1	51259	Uncharacterized protein OS=Apis mellifera OX=7460 PE=4 SV=1
A0A087ZQ90	27.84	2	1	1	70350	Uncharacterized protein OS=Apis mellifera OX=7460 GN=100578822 PE=4 SV=1
Q38SD4	27.71	2	1	1	51499	Rh-like protein OS=Apis mellifera OX=7460 PE=2 SV=1
A0A088AP32	27.71	2	1	1	52890	Rh-like protein OS=Apis mellifera OX=7460 GN=LOC551604 PE=3 SV=1
A0A088A6S7	27.53	2	1	1	132752	Uncharacterized protein OS=Apis mellifera OX=7460 PE=4 SV=1
A0A088AI42	27.51	2	1	1	66729	Uncharacterized protein OS=Apis mellifera OX=7460 GN=LOC413447 PE=4 SV=1
A0A088AKV1	27.41	2	1	1	93635	Uncharacterized protein OS=Apis mellifera OX=7460 PE=4 SV=1
A0A088AJD2	27.27	2	1	1	68505	Lipophorin receptor OS=Apis mellifera OX=7460 PE=4 SV=1
A0A088AFU1	27.17	2	1	1	59653	Uncharacterized protein OS=Apis mellifera OX=7460 GN=LOC724238 PE=4 SV=1
A0A087ZVK4	27.1	2	1	1	44217	Uncharacterized protein OS=Apis mellifera OX=7460 PE=4 SV=1
A0A088AT98	26.81	2	1	1	90029	Uncharacterized protein OS=Apis mellifera OX=7460 GN=100576132 PE=4 SV=1
A0A088AM86	26.8	2	1	1	56378	Uncharacterized protein OS=Apis mellifera OX=7460 GN=LOC552592 PE=3 SV=1
A0A088A9U5	26.76	2	1	1	109030	Uncharacterized protein OS=Apis mellifera OX=7460 GN=LOC552172 PE=4 SV=1
A0A088A7E2	26.7	2	1	1	77007	Uncharacterized protein OS=Apis mellifera OX=7460 PE=4 SV=1
A0A087ZMR4	198.72	3	13	13	623498	Uncharacterized protein OS=Apis mellifera OX=7460 PE=4 SV=1
A0A088ABA5	154.94	3	7	7	293874	Uncharacterized protein OS=Apis mellifera OX=7460 GN=LOC409457 PE=4 SV=1
A0A088A201	147.5	3	8	8	394991	Uncharacterized protein OS=Apis mellifera OX=7460 GN=LOC727221 PE=4 SV=1
A0A088AL06	145.59	3	4	4	295887	Uncharacterized protein OS=Apis mellifera OX=7460 GN=LOC409242 PE=4 SV=1
A0A087ZQX5	120.79	3	3	3	147039	Uncharacterized protein OS=Apis mellifera OX=7460 PE=4 SV=1
A0A087ZXF7	112.21	3	1	1	86837	Uncharacterized protein OS=Apis mellifera OX=7460 PE=3 SV=1
A0A087ZYA0	107.74	3	2	2	182670	5'-3' exoribonuclease 1 OS=Apis mellifera OX=7460 PE=3 SV=1
Q68J72	103.54	3	4	4	213141	Dscam OS=Apis mellifera OX=7460 PE=4 SV=1
A0A088AJY2	100.53	3	2	2	145696	Uncharacterized protein OS=Apis mellifera OX=7460 GN=LOC409752 PE=4 SV=1
A0A087ZRI3	96.16	3	2	2	79655	Uncharacterized protein OS=Apis mellifera OX=7460 PE=4 SV=1
A0A088AAT6	92.5	3	3	3	132733	Uncharacterized protein OS=Apis mellifera OX=7460 PE=4 SV=1
A0A088AB77	92.13	3	2	2	95492	Uncharacterized protein OS=Apis mellifera OX=7460 GN=Calx PE=3 SV=1
A0A088A049	90.2	3	2	2	111956	Uncharacterized protein OS=Apis mellifera OX=7460 PE=4 SV=1
A0A088A5B8	89.88	3	1	1	74091	Uncharacterized protein OS=Apis mellifera OX=7460 PE=4 SV=1
A0A088ABG0	88.83	3	1	1	56123	Uncharacterized protein OS=Apis mellifera OX=7460 GN=ebi PE=4 SV=1
A0A088ALV2	87.48	3	3	3	217643	Uncharacterized protein OS=Apis mellifera OX=7460 PE=4 SV=1
A0A088AUZ6	86.93	3	2	2	116971	Uncharacterized protein OS=Apis mellifera OX=7460 PE=4 SV=1
A0A088AD15	86.31	3	4	4	262360	Uncharacterized protein OS=Apis mellifera OX=7460 PE=4 SV=1
A0A088ARC9	85.59	3	2	2	140658	Cation-transporting ATPase OS=Apis mellifera OX=7460 PE=3 SV=1
A0A088A392	84.53	3	2	2	99418	Kinesin-like protein OS=Apis mellifera OX=7460 PE=3 SV=1
A0A087ZMS1	84.48	3	3	3	122424	Uncharacterized protein OS=Apis mellifera OX=7460 GN=emb PE=4 SV=1
A0A087ZUE2	84.31	3	4	4	200485	Uncharacterized protein OS=Apis mellifera OX=7460 GN=TEP7 PE=4 SV=1
A0A088AS96	81.28	3	3	3	156050	Uncharacterized protein OS=Apis mellifera OX=7460 PE=4 SV=1
A0A087ZMR6	79.15	3	2	2	165086	Uncharacterized protein OS=Apis mellifera OX=7460 PE=4 SV=1
A0A088ALL8	78.91	3	2	2	99889	Uncharacterized protein OS=Apis mellifera OX=7460 GN=LOC408693 PE=4 SV=1
A0A088A1R9	77.48	3	2	2	74389	Mitochondrial Rho GTPase OS=Apis mellifera OX=7460 PE=3 SV=1
A0A087ZQ07	74.43	3	2	2	143378	Uncharacterized protein OS=Apis mellifera OX=7460 PE=4 SV=1
A0A088A2J5	73.94	3	2	2	165476	Uncharacterized protein OS=Apis mellifera OX=7460 PE=4 SV=1
A0A088A1I7	73.67	3	2	2	95436	Uncharacterized protein OS=Apis mellifera OX=7460 GN=LOC413108 PE=4 SV=1
A0A088AHL5	71.64	3	2	2	139454	Structural maintenance of chromosomes protein OS=Apis mellifera OX=7460 GN=Cap PE=3 SV=1
A0A088AN53	70.69	3	3	3	177597	Uncharacterized protein OS=Apis mellifera OX=7460 PE=4 SV=1
A0A087ZTU0	70.59	3	3	3	185292	Uncharacterized protein OS=Apis mellifera OX=7460 GN=RhoGAPp190 PE=4 SV=1
A0A088AR05	70.34	3	1	1	78004	Uncharacterized protein OS=Apis mellifera OX=7460 PE=4 SV=1
A0A088AB90	69.92	3	1	1	52010	Uncharacterized protein OS=Apis mellifera OX=7460 PE=4 SV=1
A0A087ZQZ3	69.8	3	2	2	115102	Uncharacterized protein OS=Apis mellifera OX=7460 PE=4 SV=1
A0A088AD04	69.25	3	2	2	117283	Uncharacterized protein OS=Apis mellifera OX=7460 GN=Iswi PE=4 SV=1
A0A087ZTJ8	67.67	3	2	2	96263	Uncharacterized protein OS=Apis mellifera OX=7460 PE=4 SV=1
A0A088AFP7	67.57	3	1	1	54989	Uncharacterized protein OS=Apis mellifera OX=7460 PE=4 SV=1
A0A087ZX58	66.83	3	1	1	56432	Uncharacterized protein OS=Apis mellifera OX=7460 GN=LOC551273 PE=4 SV=1
A0A088AQD5	66.77	3	2	2	116349	Uncharacterized protein OS=Apis mellifera OX=7460 GN=Glurb PE=3 SV=1
A0A088A4M8	65.88	3	2	2	136461	Coronin OS=Apis mellifera OX=7460 PE=3 SV=1
A0A088ATW7	64.69	3	2	2	97499	Uncharacterized protein OS=Apis mellifera OX=7460 GN=LOC551486 PE=4 SV=1
A0A088A098	64.02	3	1	1	56050	Uncharacterized protein OS=Apis mellifera OX=7460 GN=PpD3 PE=4 SV=1
A0A088AR75	63.75	3	1	1	50717	Uncharacterized protein OS=Apis mellifera OX=7460 GN=LOC408464 PE=4 SV=1
A0A088ACY2	63.43	3	2	2	90249	AP-1 complex subunit gamma OS=Apis mellifera OX=7460 PE=3 SV=1
A0A088AEW1	63.33	3	1	1	62648	Uncharacterized protein OS=Apis mellifera OX=7460 GN=408517 PE=4 SV=1
A0A088AFH9	62.66	3	1	1	79672	Uncharacterized protein OS=Apis mellifera OX=7460 GN=nompA PE=4 SV=1
A0A087ZRS3	61.89	3	2	2	98001	Uncharacterized protein OS=Apis mellifera OX=7460 PE=3 SV=1
A0A088AIB2	61.84	3	2	2	119181	Uncharacterized protein OS=Apis mellifera OX=7460 GN=eIF5B PE=4 SV=1
A0A088A941	61.18	3	1	1	103866	Uncharacterized protein OS=Apis mellifera OX=7460 GN=LOC411905 PE=4 SV=1
A0A088AE08	60.87	3	2	2	116220	Uncharacterized protein OS=Apis mellifera OX=7460 PE=4 SV=1
A0A088A4P8	60.79	3	2	2	115464	Uncharacterized protein OS=Apis mellifera OX=7460 PE=4 SV=1
A0A088A9U4	60.65	3	1	1	79943	Uncharacterized protein OS=Apis mellifera OX=7460 PE=4 SV=1
A0A087ZVQ1	60.38	3	2	2	104450	Uncharacterized protein OS=Apis mellifera OX=7460 GN=Tao-1 PE=4 SV=1
A0A088AI75	60.15	3	2	2	149851	Diacylglycerol kinase OS=Apis mellifera OX=7460 GN=rdgA PE=3 SV=1
A0A088AUF9	60.12	3	1	1	66680	Uncharacterized protein OS=Apis mellifera OX=7460 PE=4 SV=1
A0A088A8J2	59.7	3	2	2	130780	Uncharacterized protein OS=Apis mellifera OX=7460 PE=4 SV=1
A0A088AFF3	59.14	3	1	1	56559	Uncharacterized protein OS=Apis mellifera OX=7460 PE=4 SV=1
A0A087ZXD9	58.83	3	1	1	58578	Non-specific serine/threonine protein kinase OS=Apis mellifera OX=7460 GN=SNF1A PE=4 SV=1
A0A087ZRG0	58.05	3	2	2	104400	Uncharacterized protein OS=Apis mellifera OX=7460 GN=100576404 PE=4 SV=1
A0A087ZTK8	57.58	3	1	1	70216	Uncharacterized protein OS=Apis mellifera OX=7460 PE=4 SV=1
A0A088ABT5	57.2	3	1	1	37105	Uncharacterized protein OS=Apis mellifera OX=7460 GN=LOC551459 PE=4 SV=1
A0A088A0L4	56.52	3	2	2	128764	Uncharacterized protein OS=Apis mellifera OX=7460 GN=dre4 PE=4 SV=1
A0A087ZZ30	56.22	3	2	2	91913	Uncharacterized protein OS=Apis mellifera OX=7460 GN=100578879 PE=4 SV=1
A0A087ZR40	55.57	3	1	1	49900	Uncharacterized protein OS=Apis mellifera OX=7460 GN=LOC408730 PE=4 SV=1
A0A088AJR6	54.89	3	1	1	52947	Uncharacterized protein OS=Apis mellifera OX=7460 GN=LOC410149 PE=4 SV=1
A0A088AJ72	54.64	3	1	1	76928	Uncharacterized protein OS=Apis mellifera OX=7460 GN=bgm PE=4 SV=1
A1EGW2	54.57	3	1	1	52011	Nicotinic acetylcholine receptor subunit alpha 6 transcript variant 6 (Fragment) OS=Apis mellifera OX=7460 PE=2 SV=1
A1EGW0	54.57	3	1	1	52037	Nicotinic acetylcholine receptor subunit alpha 6 transcript variant 4 (Fragment) OS=Apis mellifera OX=7460 PE=2 SV=1
A1EGV9	54.57	3	1	1	51901	Nicotinic acetylcholine receptor subunit alpha 6 transcript variant 3 (Fragment) OS=Apis mellifera OX=7460 PE=2 SV=1
A1EGV8	54.57	3	1	1	51990	Nicotinic acetylcholine receptor subunit alpha 6 transcript variant 2 (Fragment) OS=Apis mellifera OX=7460 PE=2 SV=1
A1EGW1	54.57	3	1	1	52007	Nicotinic acetylcholine receptor subunit alpha 6 transcript variant 5 (Fragment) OS=Apis mellifera OX=7460 PE=2 SV=1
A1EGV7	54.57	3	1	1	52001	Nicotinic acetylcholine receptor subunit alpha 6 transcript variant 1 (Fragment) OS=Apis mellifera OX=7460 PE=2 SV=1
A0A087ZX16	54.57	3	1	1	59074	Uncharacterized protein OS=Apis mellifera OX=7460 PE=3 SV=1
A0EIZ6	54.57	3	1	1	59965	Nicotinic acetylcholine receptor alpha6 subunit OS=Apis mellifera OX=7460 PE=2 SV=1
A0A0H3V1B7	54.57	3	1	1	59866	Nicotinic acetylcholine receptor alpha6 subunit OS=Apis mellifera OX=7460 GN=nAChRalpha6 PE=2 SV=1
A0EIZ5	54.57	3	1	1	59930	Nicotinic acetylcholine receptor alpha6 subunit OS=Apis mellifera OX=7460 PE=2 SV=1
A0A088APU1	54.4	3	1	1	57247	Uncharacterized protein OS=Apis mellifera OX=7460 GN=LOC551041 PE=3 SV=1
A0A087ZP93	53.7	3	1	1	57910	Uncharacterized protein OS=Apis mellifera OX=7460 PE=4 SV=1
A0A088AIQ1	53.66	3	2	2	80415	Uncharacterized protein OS=Apis mellifera OX=7460 GN=LOC552768 PE=4 SV=1
A0A088AHA0	53.6	3	1	1	45267	Uncharacterized protein OS=Apis mellifera OX=7460 GN=LOC551447 PE=3 SV=1
A0A088ADM6	53.52	3	1	1	53424	Uncharacterized protein OS=Apis mellifera OX=7460 GN=LOC550748 PE=4 SV=1
A0A087ZR03	53.49	3	1	1	57368	NADPH:adrenodoxin oxidoreductase mitochondrial OS=Apis mellifera OX=7460 PE=3 SV=1
A0A087ZT96	53.19	3	2	2	102127	Uncharacterized protein OS=Apis mellifera OX=7460 PE=4 SV=1
A0A087ZVX1	53	3	1	1	68039	Uncharacterized protein OS=Apis mellifera OX=7460 GN=LOC410732 PE=4 SV=1
A0A088AFM8	52.55	3	1	1	51351	Uncharacterized protein OS=Apis mellifera OX=7460 PE=4 SV=1
A0A088A5Z7	51.12	3	1	1	65292	Eukaryotic translation initiation factor 2A OS=Apis mellifera OX=7460 GN=LOC552764 PE=3 SV=1
A0A088A145	50.89	3	1	1	92997	Uncharacterized protein OS=Apis mellifera OX=7460 GN=Cbp80 PE=4 SV=1
A0A087ZXK6	50.45	3	1	1	68756	alpha-1 2-Mannosidase OS=Apis mellifera OX=7460 GN=LOC413579 PE=3 SV=1
A0A088AAM1	49.13	3	1	1	51545	Uncharacterized protein OS=Apis mellifera OX=7460 GN=LOC409876 PE=4 SV=1
A0A088ACG1	48.96	3	1	1	74755	Uncharacterized protein OS=Apis mellifera OX=7460 GN=MTMR2 PE=4 SV=1
A0A088A9T3	48.46	3	1	1	55245	Uncharacterized protein OS=Apis mellifera OX=7460 PE=4 SV=1
A0A088AW21	48.24	3	1	1	76515	Uncharacterized protein OS=Apis mellifera OX=7460 GN=LOC551672 PE=4 SV=1
A0A088A4D6	47.42	3	1	1	47536	Uncharacterized protein OS=Apis mellifera OX=7460 GN=LOC408724 PE=4 SV=1
A0A088AJL4	47.34	3	1	1	59987	Uncharacterized protein OS=Apis mellifera OX=7460 GN=LOC726625 PE=4 SV=1
A0A088ARC6	47.09	3	1	1	59933	Uncharacterized protein OS=Apis mellifera OX=7460 PE=4 SV=1
A0A088A6E6	46.66	3	1	1	47588	Uncharacterized protein OS=Apis mellifera OX=7460 PE=4 SV=1
A0A088AK91	45.87	3	1	1	42301	Methionine aminopeptidase OS=Apis mellifera OX=7460 GN=LOC410385 PE=3 SV=1
A0A088A0R5	45.84	3	2	2	133667	Uncharacterized protein OS=Apis mellifera OX=7460 PE=4 SV=1
A0A087ZWE5	45.58	3	1	1	100334	Exocyst complex component 2 OS=Apis mellifera OX=7460 GN=sec5 PE=3 SV=1
A0A088ACB6	45.43	3	1	1	73413	Uncharacterized protein OS=Apis mellifera OX=7460 PE=4 SV=1
A0A088ADK8	44.75	3	2	2	77521	Uncharacterized protein OS=Apis mellifera OX=7460 GN=Gfat2 PE=4 SV=1
A0A088A5L4	44.21	3	2	2	94491	Uncharacterized protein OS=Apis mellifera OX=7460 PE=4 SV=1
A0A088A2C3	43.11	3	1	1	36222	SURF1-like protein OS=Apis mellifera OX=7460 GN=Surf1 PE=3 SV=1
A0A088AKR6	41.83	3	1	1	80688	Uncharacterized protein OS=Apis mellifera OX=7460 GN=LOC409425 PE=4 SV=1
A0A088AV05	41.69	3	1	1	41203	Uncharacterized protein OS=Apis mellifera OX=7460 GN=LOC409087 PE=4 SV=1
A0A087ZYB6	41.68	3	1	1	58809	Uncharacterized protein OS=Apis mellifera OX=7460 PE=4 SV=1
A0A088A439	41.54	3	1	1	75033	Uncharacterized protein OS=Apis mellifera OX=7460 GN=LOC552363 PE=4 SV=1
A0A088ACF5	41.36	3	1	1	54796	Uncharacterized protein OS=Apis mellifera OX=7460 PE=4 SV=1
A0A088AN71	41.34	3	1	1	49837	Uncharacterized protein OS=Apis mellifera OX=7460 PE=3 SV=1
Q0GQR2	41.22	3	1	1	48626	Histamine-gated chloride channel OS=Apis mellifera OX=7460 GN=Hiscl1 PE=2 SV=1
A0A1B1QGE4	41.22	3	1	1	47438	Histamine-gated chloride channel 1 OS=Apis mellifera OX=7460 GN=Hiscl1 PE=2 SV=1
A0A088APV3	41.21	3	1	1	88119	Uncharacterized protein OS=Apis mellifera OX=7460 GN=LOC550991 PE=4 SV=1
A0A088AKR5	40.9	3	1	1	49705	Uncharacterized protein OS=Apis mellifera OX=7460 PE=4 SV=1
A0A088A4J1	40.55	3	1	1	46346	Uncharacterized protein OS=Apis mellifera OX=7460 PE=4 SV=1
A0A088AMQ5	40.19	3	1	1	72987	Uncharacterized protein OS=Apis mellifera OX=7460 PE=4 SV=1
A0A088AC50	39.3	3	1	1	68694	Uncharacterized protein OS=Apis mellifera OX=7460 PE=4 SV=1
A0A087ZQ06	38.76	3	1	1	60225	Uncharacterized protein OS=Apis mellifera OX=7460 GN=LOC411407 PE=4 SV=1
A0A088A815	37.44	3	1	1	51862	Uncharacterized protein OS=Apis mellifera OX=7460 PE=4 SV=1
A0A087ZQ64	37.27	3	1	1	59084	Uncharacterized protein OS=Apis mellifera OX=7460 PE=4 SV=1
A0A088A7R6	36.97	3	1	1	34726	Protein BCCIP homolog OS=Apis mellifera OX=7460 PE=3 SV=1
A0A088AJD4	36.87	3	1	1	49217	Uncharacterized protein OS=Apis mellifera OX=7460 PE=4 SV=1
A0A088AJJ4	36.86	3	1	1	40662	Uncharacterized protein OS=Apis mellifera OX=7460 GN=LOC551376 PE=4 SV=1
A0A088A0Q8	36.85	3	1	1	92204	Uncharacterized protein OS=Apis mellifera OX=7460 PE=4 SV=1
A0A088AFM1	36.71	3	1	1	49528	Uncharacterized protein OS=Apis mellifera OX=7460 PE=4 SV=1
A0A087ZSF2	36.54	3	1	1	76123	Uncharacterized protein OS=Apis mellifera OX=7460 GN=LOC410546 PE=4 SV=1
A0A088AVE3	36.16	3	1	1	56610	Uncharacterized protein OS=Apis mellifera OX=7460 GN=LOC411140 PE=3 SV=1
A0A088A3P3	35.84	3	1	1	47625	Uncharacterized protein OS=Apis mellifera OX=7460 GN=mRpL38 PE=4 SV=1
A0A087ZZY5	35.64	3	1	1	54753	Uncharacterized protein OS=Apis mellifera OX=7460 PE=4 SV=1
A0A088ABL8	35.43	3	1	1	53598	Uncharacterized protein OS=Apis mellifera OX=7460 PE=4 SV=1
A0A088ALK7	35.17	3	1	1	40400	Uncharacterized protein OS=Apis mellifera OX=7460 PE=4 SV=1
A0A088A3L3	34.47	3	1	1	67066	Uncharacterized protein OS=Apis mellifera OX=7460 GN=LOC725576 PE=4 SV=1
A0A088ABF9	34.44	3	1	1	64653	Non-specific serine/threonine protein kinase OS=Apis mellifera OX=7460 GN=Pak PE=4 SV=1
A0A088A835	34.35	3	1	1	49203	Uncharacterized protein OS=Apis mellifera OX=7460 GN=100577273 PE=4 SV=1
A0A120HXK8	34.35	3	1	1	49203	Temperature induced paralysis locus E-like protein 3 OS=Apis mellifera OX=7460 PE=2 SV=1
A0A088AQQ1	34.16	3	1	1	45614	Uncharacterized protein OS=Apis mellifera OX=7460 GN=LOC409311 PE=4 SV=1
A0A087ZPW5	33.91	3	1	1	66991	Uncharacterized protein OS=Apis mellifera OX=7460 PE=4 SV=1
A0A088AJT8	33.73	3	1	1	69603	Uncharacterized protein OS=Apis mellifera OX=7460 GN=fidipidine PE=4 SV=1
A0A088AUS6	33.34	3	1	1	35707	Uncharacterized protein OS=Apis mellifera OX=7460 GN=mRpL19 PE=4 SV=1
A0A087ZWF1	33.06	3	1	1	68809	Uncharacterized protein OS=Apis mellifera OX=7460 GN=Taf6 PE=4 SV=1
A0A088AE32	32.78	3	1	1	36819	Uncharacterized protein OS=Apis mellifera OX=7460 PE=4 SV=1
A0A088AVJ1	32.69	3	1	1	36167	Uncharacterized protein OS=Apis mellifera OX=7460 GN=LOC410952 PE=3 SV=1
A0A088ARZ0	31.98	3	1	1	57083	Uncharacterized protein OS=Apis mellifera OX=7460 GN=LOC724123 PE=3 SV=1
A0A088ASW7	31.82	3	1	1	85935	Uncharacterized protein OS=Apis mellifera OX=7460 GN=LOC551822 PE=3 SV=1
A0A087ZY71	31.59	3	1	1	31111	Uncharacterized protein OS=Apis mellifera OX=7460 GN=LOC411391 PE=4 SV=1
A0A087ZZZ7	31.5	3	1	1	37260	Uncharacterized protein OS=Apis mellifera OX=7460 PE=4 SV=1
A0A088AMW8	31.35	3	1	1	34158	Uncharacterized protein OS=Apis mellifera OX=7460 GN=LOC551045 PE=4 SV=1
A0A087ZVL3	31.13	3	1	1	159119	Uncharacterized protein OS=Apis mellifera OX=7460 PE=4 SV=1
A0A087ZSK6	31.11	3	1	1	55467	Uncharacterized protein OS=Apis mellifera OX=7460 GN=LOC409154 PE=4 SV=1
A0A088ABN6	30.91	3	1	1	65738	Uncharacterized protein OS=Apis mellifera OX=7460 GN=100577578 PE=4 SV=1
A0A088APV8	30.62	3	1	1	41590	Uncharacterized protein OS=Apis mellifera OX=7460 GN=LOC552590 PE=4 SV=1
A0A088A7Z4	30.44	3	1	1	52357	Uncharacterized protein OS=Apis mellifera OX=7460 PE=4 SV=1
A0A088APM4	30.29	3	1	1	59306	Glucosylceramidase OS=Apis mellifera OX=7460 GN=LOC409708 PE=3 SV=1
A0A088AAA6	30.28	3	1	1	98972	Uncharacterized protein OS=Apis mellifera OX=7460 PE=4 SV=1
A0A088AJ10	30.2	3	1	1	47695	Uncharacterized protein OS=Apis mellifera OX=7460 GN=LOC409639 PE=4 SV=1
A0A088ANI7	30.19	3	1	1	44006	GPN-loop GTPase OS=Apis mellifera OX=7460 GN=LOC725745 PE=3 SV=1
A0A088AP84	30.15	3	1	1	42862	Uncharacterized protein OS=Apis mellifera OX=7460 GN=LOC411304 PE=4 SV=1
A0A087ZNG4	30.03	3	1	1	38877	Uncharacterized protein OS=Apis mellifera OX=7460 GN=mRpL45 PE=4 SV=1
A0A088AS86	29.77	3	1	1	64117	Uncharacterized protein OS=Apis mellifera OX=7460 GN=100577288 PE=4 SV=1
A0A088AGJ9	29.72	3	1	1	39352	Uncharacterized protein OS=Apis mellifera OX=7460 GN=100576418 PE=4 SV=1
A0A088AFQ1	29.55	3	1	1	73404	Uncharacterized protein OS=Apis mellifera OX=7460 GN=LOC411091 PE=4 SV=1
A0A088AM04	29.32	3	1	1	120504	Uncharacterized protein OS=Apis mellifera OX=7460 PE=4 SV=1
A0A088ARB7	28.91	3	1	1	71302	Uncharacterized protein OS=Apis mellifera OX=7460 GN=100577050 PE=4 SV=1
A0A088A3M2	28.84	3	1	1	36940	Uncharacterized protein OS=Apis mellifera OX=7460 GN=102654555 PE=4 SV=1
B6V6A3	28.54	3	1	1	33931	Silk fibroin 4 OS=Apis mellifera OX=7460 GN=Fibroin4 PE=2 SV=1
A0A088ALT4	28.45	3	1	1	51613	Uncharacterized protein OS=Apis mellifera OX=7460 PE=3 SV=1
A0A088AM02	28.42	3	1	1	66616	Uncharacterized protein OS=Apis mellifera OX=7460 GN=LOC409671 PE=4 SV=1
A0A087ZPC4	28.26	3	1	1	37712	Uncharacterized protein OS=Apis mellifera OX=7460 GN=LOC552170 PE=4 SV=1
A0A088A780	27.93	3	1	1	43770	Uncharacterized protein OS=Apis mellifera OX=7460 PE=4 SV=1
A0A088ABX3	27.85	3	1	1	40375	Peptidylprolyl isomerase OS=Apis mellifera OX=7460 GN=FK506-bp1 PE=4 SV=1
A0A087ZP24	27.78	3	1	1	51804	Uncharacterized protein OS=Apis mellifera OX=7460 GN=eIF2B-gamma PE=4 SV=1
A0A087ZST9	27.76	3	1	1	36583	Uncharacterized protein OS=Apis mellifera OX=7460 GN=LOC411856 PE=4 SV=1
A0A088APH0	27.67	3	1	1	65084	Uncharacterized protein OS=Apis mellifera OX=7460 GN=mRpS30 PE=4 SV=1
A0A088AMD7	27.56	3	1	1	73038	Uncharacterized protein OS=Apis mellifera OX=7460 GN=LOC726373 PE=4 SV=1
A0A088A8J8	27.29	3	1	1	34172	Deoxyhypusine hydroxylase OS=Apis mellifera OX=7460 GN=LOC410763 PE=3 SV=1
A0A088ADP0	27.02	3	1	1	51471	Uncharacterized protein OS=Apis mellifera OX=7460 GN=LOC411048 PE=4 SV=1
A0A087ZUA7	26.77	3	1	1	63304	Uncharacterized protein OS=Apis mellifera OX=7460 GN=LOC412804 PE=4 SV=1
A0A088AUS4	26.73	3	1	1	91751	Uncharacterized protein OS=Apis mellifera OX=7460 GN=cul-5 PE=3 SV=1
A0A087ZMR7	195.67	4	18	18	851375	Uncharacterized protein OS=Apis mellifera OX=7460 PE=4 SV=1
A0A087ZP31	186.44	4	11	11	500017	Uncharacterized protein OS=Apis mellifera OX=7460 PE=4 SV=1
A0A087ZQJ5	176.19	4	5	2	115164	Sodium/potassium-transporting ATPase subunit alpha OS=Apis mellifera OX=7460 PE=3 SV=1
A0A088A6U0	174.02	4	5	5	206626	Uncharacterized protein OS=Apis mellifera OX=7460 PE=4 SV=1
A0A087ZSL5	154.41	4	5	5	223027	Uncharacterized protein OS=Apis mellifera OX=7460 GN=LOC552031 PE=4 SV=1
A0A087ZWC0	154.34	4	4	4	215499	Uncharacterized protein OS=Apis mellifera OX=7460 PE=4 SV=1
A0A088AUI4	148.73	4	3	3	147424	Uncharacterized protein OS=Apis mellifera OX=7460 GN=LOC551167 PE=4 SV=1
A0A088AT46	142.98	4	2	2	70629	Uncharacterized protein OS=Apis mellifera OX=7460 GN=LOC410752 PE=4 SV=1
A0A087ZZ70	138.2	4	4	1	226775	Uncharacterized protein OS=Apis mellifera OX=7460 PE=4 SV=1
A0A088A1K2	132.3	4	6	6	199258	Uncharacterized protein OS=Apis mellifera OX=7460 PE=3 SV=1
A0A087ZUH9	118.19	4	6	6	269784	Uncharacterized protein OS=Apis mellifera OX=7460 GN=CNOT1 PE=4 SV=1
A0A088AR64	114.64	4	4	4	113391	Uncharacterized protein OS=Apis mellifera OX=7460 PE=4 SV=1
A0A088AQ15	113.55	4	3	3	138675	Uncharacterized protein OS=Apis mellifera OX=7460 GN=LOC412111 PE=4 SV=1
A0A087ZWD9	106.66	4	3	3	144292	Uncharacterized protein OS=Apis mellifera OX=7460 GN=100578159 PE=4 SV=1
A0A087ZYX9	106.49	4	2	2	78239	Transporter OS=Apis mellifera OX=7460 PE=3 SV=1
A0A088AKV2	104.47	4	2	2	86954	Uncharacterized protein OS=Apis mellifera OX=7460 PE=4 SV=1
A0A088ABB1	103.09	4	2	2	65330	Uncharacterized protein OS=Apis mellifera OX=7460 PE=4 SV=1
A0A088A206	102.22	4	4	4	156390	Uncharacterized protein OS=Apis mellifera OX=7460 GN=100576717 PE=4 SV=1
A0A087ZMU0	100.72	4	5	5	156165	Uncharacterized protein OS=Apis mellifera OX=7460 PE=4 SV=1
A0A088AGZ0	98.43	4	2	2	102036	Uncharacterized protein OS=Apis mellifera OX=7460 PE=4 SV=1
A0A088AJ80	97.8	4	5	5	209798	Uncharacterized protein OS=Apis mellifera OX=7460 PE=4 SV=1
A0A088ANZ6	95.97	4	3	3	101531	Uncharacterized protein OS=Apis mellifera OX=7460 GN=LOC409186 PE=4 SV=1
A0A087ZRN5	94.88	4	3	3	165117	Uncharacterized protein OS=Apis mellifera OX=7460 PE=4 SV=1
A0A088ACG9	94.76	4	2	2	67386	Uncharacterized protein OS=Apis mellifera OX=7460 GN=NUP54 PE=4 SV=1
A0A088AFV7	94.15	4	3	3	160710	Uncharacterized protein OS=Apis mellifera OX=7460 GN=LOC408624 PE=4 SV=1
A0A087ZZI8	93.44	4	2	2	88836	Uncharacterized protein OS=Apis mellifera OX=7460 GN=RabGAP9 PE=4 SV=1
A0A088A186	90.93	4	1	1	33219	Uncharacterized protein OS=Apis mellifera OX=7460 PE=3 SV=1
A0A088ADI5	89.01	4	3	3	150406	Uncharacterized protein OS=Apis mellifera OX=7460 PE=4 SV=1
A0A087ZP04	88.56	4	2	2	71779	Uncharacterized protein OS=Apis mellifera OX=7460 GN=LOC413252 PE=4 SV=1
A0A088AM88	88.13	4	2	2	73169	Uncharacterized protein OS=Apis mellifera OX=7460 PE=3 SV=1
A0A088AFJ6	87.45	4	3	3	128039	Uncharacterized protein OS=Apis mellifera OX=7460 PE=4 SV=1
A0A088AAE7	87.14	4	3	3	96705	Uncharacterized protein OS=Apis mellifera OX=7460 PE=4 SV=1
A0A088A5V3	86.63	4	3	3	165986	Uncharacterized protein OS=Apis mellifera OX=7460 GN=kinesin-4A PE=3 SV=1
A0A087ZXL5	86.46	4	4	4	193112	Inositol hexakisphosphate and diphosphoinositol-pentakisphosphate kinase OS=Apis mellifera OX=7460 PE=3 SV=1
A0A087ZV36	86.05	4	1	1	42141	Uncharacterized protein OS=Apis mellifera OX=7460 GN=LOC409696 PE=4 SV=1
A0A088AHR7	85.72	4	2	2	89833	Uncharacterized protein OS=Apis mellifera OX=7460 PE=4 SV=1
A0A087ZYS2	85.54	4	2	2	95907	Vacuolar protein sorting-associated protein 16 homolog OS=Apis mellifera OX=7460 GN=Vps16A PE=3 SV=1
A0A088ATI8	84.76	4	2	2	108813	Uncharacterized protein OS=Apis mellifera OX=7460 GN=Hip1 PE=4 SV=1
A0A088A114	83.94	4	2	2	96101	Uncharacterized protein OS=Apis mellifera OX=7460 PE=3 SV=1
A0A087ZYU3	82.47	4	2	2	81944	Uncharacterized protein OS=Apis mellifera OX=7460 PE=4 SV=1
A0A088ARN5	82.22	4	2	2	88406	Uncharacterized protein OS=Apis mellifera OX=7460 GN=LOC413633 PE=4 SV=1
A0A087ZSU4	82.1	4	1	1	52389	Uncharacterized protein OS=Apis mellifera OX=7460 GN=Sec61alpha PE=3 SV=1
A0A088AQQ5	81.85	4	3	3	155450	Uncharacterized protein OS=Apis mellifera OX=7460 PE=4 SV=1
A0A088A8Z7	79.8	4	4	4	135389	Uncharacterized protein OS=Apis mellifera OX=7460 GN=g PE=4 SV=1
A0A088AGR0	79.42	4	2	2	76384	Uncharacterized protein OS=Apis mellifera OX=7460 GN=GckIII PE=4 SV=1
A0A088A222	77.66	4	3	3	133707	Uncharacterized protein OS=Apis mellifera OX=7460 GN=Aats-val PE=3 SV=1
A0A087ZXT9	77.66	4	2	2	104260	Uncharacterized protein OS=Apis mellifera OX=7460 GN=smid PE=4 SV=1
A0A088AG06	77.36	4	2	2	86256	Uncharacterized protein OS=Apis mellifera OX=7460 GN=SF3A1 PE=4 SV=1
A0A088A894	77.13	4	1	1	69756	Tyrosine-protein phosphatase non-receptor type OS=Apis mellifera OX=7460 GN=csw PE=3 SV=1
A0A088A2G2	75.42	4	2	2	93911	Uncharacterized protein OS=Apis mellifera OX=7460 GN=LOC413512 PE=4 SV=1
A0A088APQ7	75.39	4	2	2	107499	Uncharacterized protein OS=Apis mellifera OX=7460 GN=swm PE=4 SV=1
A0A088ARP7	74.3	4	2	2	86594	Uncharacterized protein OS=Apis mellifera OX=7460 GN=LOC412943 PE=4 SV=1
A0A087ZWI4	73.53	4	1	1	66675	Uncharacterized protein OS=Apis mellifera OX=7460 GN=LOC408324 PE=4 SV=1
A0A088AQ77	72.49	4	2	2	94586	Uncharacterized protein OS=Apis mellifera OX=7460 GN=Tsf2 PE=4 SV=1
A0A088AH77	71.18	4	2	2	110269	Uncharacterized protein OS=Apis mellifera OX=7460 GN=Syt12 PE=4 SV=1
A0A088AH48	69.68	4	2	2	97424	Uncharacterized protein OS=Apis mellifera OX=7460 PE=4 SV=1
A0A088AMU0	69.25	4	1	1	47530	Uncharacterized protein OS=Apis mellifera OX=7460 GN=HtrA2 PE=4 SV=1
A0A088ASQ3	69.11	4	3	3	111491	Uncharacterized protein OS=Apis mellifera OX=7460 GN=elk PE=4 SV=1
A0A088AR11	67.86	4	1	1	40801	Uncharacterized protein OS=Apis mellifera OX=7460 PE=4 SV=1
A0A222LPT2	67.66	4	3	3	175793	Putative cyclin-dependent serine/threonine-protein kinase OS=Apis mellifera OX=7460 PE=2 SV=1
A0A087ZMS8	67.66	4	3	3	169791	Uncharacterized protein OS=Apis mellifera OX=7460 PE=4 SV=1
A0A087ZPT5	67.64	4	3	3	138133	Phosphodiesterase OS=Apis mellifera OX=7460 PE=3 SV=1
A0A088ALT2	66.68	4	3	3	130800	Cation-transporting ATPase OS=Apis mellifera OX=7460 GN=LOC412741 PE=3 SV=1
A0A088ADA2	66.43	4	1	1	82401	Uncharacterized protein OS=Apis mellifera OX=7460 GN=LOC409178 PE=4 SV=1
A0A088AJG4	66	4	1	1	41717	Uncharacterized protein OS=Apis mellifera OX=7460 GN=LOC413885 PE=4 SV=1
Q9NG02	65.4	4	1	1	44651	G-protein coupled receptor OS=Apis mellifera OX=7460 GN=tyr1 PE=2 SV=1
A0A088AP70	64.18	4	1	1	32616	Uncharacterized protein OS=Apis mellifera OX=7460 GN=LOC410012 PE=4 SV=1
A0A088AF87	63.41	4	2	2	60187	Uncharacterized protein OS=Apis mellifera OX=7460 GN=slmb PE=4 SV=1
A0A087ZRH9	63.29	4	2	2	100288	Uncharacterized protein OS=Apis mellifera OX=7460 PE=3 SV=1
A0A088ARI7	61.71	4	3	3	101876	Uncharacterized protein OS=Apis mellifera OX=7460 PE=4 SV=1
A0A088A8G2	60.58	4	1	1	42441	Uncharacterized protein OS=Apis mellifera OX=7460 GN=LOC413120 PE=4 SV=1
A0A087ZY10	60.52	4	3	2	79504	Uncharacterized protein OS=Apis mellifera OX=7460 PE=4 SV=1
A0A088A8W5	59.87	4	1	1	49318	Uncharacterized protein OS=Apis mellifera OX=7460 GN=Rga PE=4 SV=1
A0A087ZZN6	59.44	4	2	2	72308	Uncharacterized protein OS=Apis mellifera OX=7460 GN=atl PE=4 SV=1
A0A088AUG5	59.05	4	2	2	122100	Uncharacterized protein OS=Apis mellifera OX=7460 GN=LOC552044 PE=4 SV=1
A0A088A5F6	58.86	4	1	1	79316	Uncharacterized protein OS=Apis mellifera OX=7460 GN=LOC552625 PE=4 SV=1
A0A087ZQU8	58.72	4	2	2	60162	Uncharacterized protein OS=Apis mellifera OX=7460 GN=ric8a PE=4 SV=1
A0A087ZVJ2	58.47	4	2	2	106579	Uncharacterized protein OS=Apis mellifera OX=7460 PE=4 SV=1
A0A088A592	58.37	4	2	2	69710	Uncharacterized protein OS=Apis mellifera OX=7460 PE=4 SV=1
A0A088APW2	57.88	4	2	2	103812	Uncharacterized protein OS=Apis mellifera OX=7460 PE=4 SV=1
A0A088ACZ0	57.79	4	2	2	95587	Uncharacterized protein OS=Apis mellifera OX=7460 GN=LOC726065 PE=4 SV=1
A0A088ADG0	57.7	4	2	2	76449	Uncharacterized protein OS=Apis mellifera OX=7460 PE=4 SV=1
A0A088AHW7	57.6	4	1	1	38016	Uncharacterized protein OS=Apis mellifera OX=7460 GN=LOC410195 PE=4 SV=1
A0A088AH38	56.27	4	1	1	37418	Uncharacterized protein OS=Apis mellifera OX=7460 PE=4 SV=1
A0A087ZRK9	55.9	4	1	1	55335	Catalase OS=Apis mellifera OX=7460 PE=3 SV=1
A0A088AHF8	55.14	4	2	2	48944	Uncharacterized protein OS=Apis mellifera OX=7460 GN=LOC552253 PE=3 SV=1
A0A088AGN2	55.08	4	1	1	42795	Uncharacterized protein OS=Apis mellifera OX=7460 PE=4 SV=1
A0A087ZPZ2	53.09	4	2	2	78973	Uncharacterized protein OS=Apis mellifera OX=7460 GN=LOC552294 PE=4 SV=1
T1SGQ4	52.32	4	2	2	83567	cGMP-dependent protein kinase OS=Apis mellifera OX=7460 PE=2 SV=1
Q8SSX4	52.32	4	2	2	77299	cGMP-dependent protein kinase OS=Apis mellifera OX=7460 PE=2 SV=1
A0A088AEM0	52.32	4	2	2	73909	cGMP-dependent protein kinase foraging OS=Apis mellifera OX=7460 PE=4 SV=1
T1SH73	52.32	4	2	2	76811	cGMP-dependent protein kinase OS=Apis mellifera OX=7460 PE=2 SV=1
A0A088AFM6	51.25	4	1	1	49650	Uncharacterized protein OS=Apis mellifera OX=7460 GN=Mkk4 PE=3 SV=1
A0A087ZVH4	51.14	4	2	2	88528	Uncharacterized protein OS=Apis mellifera OX=7460 GN=PANK4 PE=4 SV=1
A0A088ABS5	50.57	4	1	1	49612	Uncharacterized protein OS=Apis mellifera OX=7460 PE=3 SV=1
A0A088A332	48.92	4	1	1	44589	Alpha-galactosidase OS=Apis mellifera OX=7460 PE=3 SV=1
A0A088ANP6	48.78	4	2	2	70037	Uncharacterized protein OS=Apis mellifera OX=7460 GN=100578513 PE=4 SV=1
A0A088AB56	48.77	4	2	2	83641	Uncharacterized protein OS=Apis mellifera OX=7460 PE=4 SV=1
A0A087ZW06	48.14	4	1	1	34773	Uncharacterized protein OS=Apis mellifera OX=7460 PE=4 SV=1
A0A088ATL6	47.47	4	1	1	36985	Uncharacterized protein OS=Apis mellifera OX=7460 PE=4 SV=1
A0A088AS01	47.18	4	1	1	38972	Uncharacterized protein OS=Apis mellifera OX=7460 GN=LOC411901 PE=4 SV=1
A0A088A700	46.63	4	2	2	86706	Uncharacterized protein OS=Apis mellifera OX=7460 PE=4 SV=1
A0A088A3F2	45.93	4	1	1	44247	Uncharacterized protein OS=Apis mellifera OX=7460 PE=4 SV=1
A0A087ZTV4	45.8	4	1	1	40569	Uncharacterized protein OS=Apis mellifera OX=7460 GN=LOC550914 PE=4 SV=1
A0A087ZU62	45.38	4	1	1	44225	Uncharacterized protein OS=Apis mellifera OX=7460 GN=LOC411142 PE=3 SV=1
A0A088AKR2	45.2	4	1	1	51652	Uncharacterized protein OS=Apis mellifera OX=7460 GN=LOC725592 PE=4 SV=1
A0A0B4J2L9	45.12	4	1	1	25121	GTP:AMP phosphotransferase mitochondrial OS=Apis mellifera OX=7460 GN=Adk3 PE=3 SV=1
A0A088A7B9	43.17	4	2	2	69425	Uncharacterized protein OS=Apis mellifera OX=7460 GN=LOC411364 PE=4 SV=1
A0A088AJH6	43.14	4	1	1	64905	Uncharacterized protein OS=Apis mellifera OX=7460 GN=LOC412299 PE=3 SV=1
A0A088AR66	42.25	4	1	1	30079	Uncharacterized protein OS=Apis mellifera OX=7460 GN=LOC410518 PE=4 SV=1
A0A088AJH8	41.83	4	1	1	29668	Uncharacterized protein OS=Apis mellifera OX=7460 PE=4 SV=1
A0A088AVM2	41.78	4	1	1	43087	Protein-tyrosine sulfotransferase OS=Apis mellifera OX=7460 GN=Tango13 PE=3 SV=1
A0A088AMF3	41.77	4	1	1	54956	Glycylpeptide N-tetradecanoyltransferase OS=Apis mellifera OX=7460 PE=3 SV=1
A0A088AQ83	41.39	4	1	1	39384	Uncharacterized protein OS=Apis mellifera OX=7460 PE=4 SV=1
A0A087ZYE2	41.03	4	1	1	41262	Uncharacterized protein OS=Apis mellifera OX=7460 PE=4 SV=1
A0A088A3H6	40.78	4	1	1	42806	Uncharacterized protein OS=Apis mellifera OX=7460 PE=4 SV=1
A0A088ATY4	40.21	4	1	1	64646	Uncharacterized protein OS=Apis mellifera OX=7460 PE=4 SV=1
A0A088A3T5	40.02	4	1	1	42966	Uncharacterized protein OS=Apis mellifera OX=7460 PE=4 SV=1
A0A088AVY6	39.12	4	1	1	52023	Uncharacterized protein OS=Apis mellifera OX=7460 GN=Nup58 PE=4 SV=1
A0A088AHM0	37.35	4	1	1	43764	Uncharacterized protein OS=Apis mellifera OX=7460 GN=Unc-76 PE=4 SV=1
A0A088A2T3	37.08	4	1	1	44326	Uncharacterized protein OS=Apis mellifera OX=7460 PE=4 SV=1
A0A087ZZH7	36.62	4	1	1	35034	Uncharacterized protein OS=Apis mellifera OX=7460 GN=408915 PE=4 SV=1
A0A088A6N2	36.59	4	1	1	30730	Uncharacterized protein OS=Apis mellifera OX=7460 PE=4 SV=1
A0A088AQM4	36.13	4	1	1	61402	Uncharacterized protein OS=Apis mellifera OX=7460 PE=4 SV=1
A0A088ANW0	35.19	4	1	1	43259	Uncharacterized protein OS=Apis mellifera OX=7460 GN=LOC411305 PE=3 SV=1
A0A088AV41	35.15	4	1	1	30131	Uncharacterized protein OS=Apis mellifera OX=7460 GN=mRpL24 PE=3 SV=1
A0A088A108	34.98	4	1	1	37165	Uncharacterized protein OS=Apis mellifera OX=7460 GN=LOC411863 PE=4 SV=1
A0A088A0Q9	34.67	4	1	1	66445	Uncharacterized protein OS=Apis mellifera OX=7460 PE=4 SV=1
A0A088AR33	34.62	4	1	1	20047	Uncharacterized protein OS=Apis mellifera OX=7460 GN=Aprt PE=3 SV=1
A0A087ZR45	34.56	4	1	1	85696	Uncharacterized protein OS=Apis mellifera OX=7460 PE=4 SV=1
A0A088AFG2	34.13	4	1	1	53724	Uncharacterized protein OS=Apis mellifera OX=7460 PE=4 SV=1
A0A088ABW5	34.03	4	1	1	24454	Uncharacterized protein OS=Apis mellifera OX=7460 GN=LOC410883 PE=3 SV=1
A0A088A5M5	33.86	4	1	1	43189	Peptidylprolyl isomerase OS=Apis mellifera OX=7460 GN=LOC550701 PE=4 SV=1
A0A087ZWB4	33.18	4	1	1	53976	Uncharacterized protein OS=Apis mellifera OX=7460 GN=LOC413336 PE=4 SV=1
A0A088A3L2	32.5	4	1	1	55216	Uncharacterized protein OS=Apis mellifera OX=7460 GN=LOC410729 PE=4 SV=1
A0A087ZV45	32.15	4	1	1	58413	Uncharacterized protein OS=Apis mellifera OX=7460 PE=4 SV=1
A0A088AEY2	31.83	4	1	1	34799	Uncharacterized protein OS=Apis mellifera OX=7460 PE=4 SV=1
A0A0B4J2M2	31.55	4	1	1	31243	Uncharacterized protein OS=Apis mellifera OX=7460 GN=Dph5 PE=3 SV=1
A0A088AAV3	31.5	4	1	1	36921	Uncharacterized protein OS=Apis mellifera OX=7460 GN=LOC551020 PE=3 SV=1
A0A088A6W0	31.27	4	1	1	22036	Uncharacterized protein OS=Apis mellifera OX=7460 PE=4 SV=1
A0A087ZZR4	31.23	4	1	1	41523	Uncharacterized protein OS=Apis mellifera OX=7460 GN=100576859 PE=4 SV=1
A0A088AQA9	30.96	4	1	1	38890	Uncharacterized protein OS=Apis mellifera OX=7460 GN=LOC551827 PE=4 SV=1
A0A088AFG0	30.94	4	1	1	45237	Protein farnesyltransferase subunit beta OS=Apis mellifera OX=7460 PE=3 SV=1
A0A088AA80	30.9	4	1	1	27267	Protein YIPF OS=Apis mellifera OX=7460 GN=102654121 PE=3 SV=1
A0A088A896	30.8	4	1	1	27946	Uncharacterized protein OS=Apis mellifera OX=7460 GN=LOC551151 PE=4 SV=1
A0A087ZU39	30.34	4	1	1	35736	Uncharacterized protein OS=Apis mellifera OX=7460 GN=LOC725258 PE=3 SV=1
A0A088AVL4	30.05	4	1	1	43456	Protein pelota homolog OS=Apis mellifera OX=7460 GN=pelo PE=3 SV=1
A0A088ATR1	29.99	4	1	1	39532	Uncharacterized protein OS=Apis mellifera OX=7460 GN=eIF2B-beta PE=3 SV=1
A0A087ZSD8	29.82	4	1	1	46154	Uncharacterized protein OS=Apis mellifera OX=7460 GN=LOC727081 PE=4 SV=1
A0A087ZWZ3	29.6	4	1	1	39683	Uncharacterized protein OS=Apis mellifera OX=7460 PE=4 SV=1
A0A088AKC9	29.54	4	1	1	23113	Uncharacterized protein OS=Apis mellifera OX=7460 PE=4 SV=1
A0A087ZYS0	29.43	4	1	1	29037	Dolichol-phosphate mannosyltransferase subunit 1 OS=Apis mellifera OX=7460 GN=LOC409115 PE=3 SV=1
A0A087ZPQ7	28.93	4	1	1	41130	Uncharacterized protein OS=Apis mellifera OX=7460 GN=LOC725455 PE=4 SV=1
A0A088AEJ6	28.5	4	1	1	53734	Uncharacterized protein OS=Apis mellifera OX=7460 PE=3 SV=1
A0A088AS20	28.44	4	1	1	30670	Uncharacterized protein OS=Apis mellifera OX=7460 PE=4 SV=1
A0A088AT14	27.95	4	1	1	69753	Eyes absent homolog OS=Apis mellifera OX=7460 PE=3 SV=1
A0A088AKF0	27.79	4	1	1	40392	Uncharacterized protein OS=Apis mellifera OX=7460 GN=LOC410381 PE=4 SV=1
A0A088AP80	27.59	4	1	1	54465	Uncharacterized protein OS=Apis mellifera OX=7460 PE=4 SV=1
A0A087ZUW2	27.42	4	1	1	37548	Uncharacterized protein OS=Apis mellifera OX=7460 GN=LOC410062 PE=3 SV=1
A0A088A7X6	27.36	4	1	1	31127	Uncharacterized protein OS=Apis mellifera OX=7460 PE=4 SV=1
Q17053	27	4	1	1	42016	Rhodopsin long-wavelength OS=Apis mellifera OX=7460 PE=1 SV=1
Q2YD67	27	4	1	1	42045	Long wavelength sensitive opsin 1 OS=Apis mellifera OX=7460 GN=Lop1 PE=3 SV=1
A0A087ZP86	26.96	4	1	1	36063	Uncharacterized protein OS=Apis mellifera OX=7460 GN=LOC551226 PE=4 SV=1
A0A087ZZP2	26.84	4	1	1	44927	Protein Wnt OS=Apis mellifera OX=7460 GN=Wnt7 PE=3 SV=1
A0A088AV96	202.26	5	16	16	584537	Uncharacterized protein OS=Apis mellifera OX=7460 PE=4 SV=1
A0A088AEN2	165.43	5	5	5	172311	Integrin alpha-PS2 OS=Apis mellifera OX=7460 PE=3 SV=1
A0A088ALM0	161.95	5	6	6	215660	Uncharacterized protein OS=Apis mellifera OX=7460 PE=3 SV=1
A0A088AKW7	160.39	5	3	1	85442	Uncharacterized protein OS=Apis mellifera OX=7460 GN=LOC409675 PE=4 SV=1
A0A088A656	153.93	5	9	9	316529	Uncharacterized protein OS=Apis mellifera OX=7460 PE=4 SV=1
A0A088ARE6	143.49	5	7	7	224411	Uncharacterized protein OS=Apis mellifera OX=7460 GN=Spn PE=4 SV=1
A0A088AF55	142.98	5	5	5	165781	Uncharacterized protein OS=Apis mellifera OX=7460 PE=4 SV=1
A0A087ZPY4	121.06	5	4	4	147175	Uncharacterized protein OS=Apis mellifera OX=7460 PE=4 SV=1
A0A087ZUQ9	118.05	5	4	4	126964	1-phosphatidylinositol 4 5-bisphosphate phosphodiesterase OS=Apis mellifera OX=7460 PE=4 SV=1
A0A088A215	115.68	5	5	5	156926	Uncharacterized protein OS=Apis mellifera OX=7460 GN=LOC551061 PE=4 SV=1
A0A088AFE6	113.38	5	5	5	154520	Uncharacterized protein OS=Apis mellifera OX=7460 GN=413959 PE=4 SV=1
A0A088AGL1	104.3	5	2	2	51739	Uncharacterized protein OS=Apis mellifera OX=7460 GN=Hk PE=4 SV=1
A0A088AMI2	104.05	5	2	2	54158	Uncharacterized protein OS=Apis mellifera OX=7460 GN=LOC413305 PE=3 SV=1
A0A087ZWD2	100.14	5	3	3	80453	Uncharacterized protein OS=Apis mellifera OX=7460 GN=LOC409265 PE=4 SV=1
A0A087ZW78	99.42	5	3	3	104387	Uncharacterized protein OS=Apis mellifera OX=7460 GN=LOC413091 PE=4 SV=1
A0A088AVQ9	97.76	5	1	1	44692	Uncharacterized protein OS=Apis mellifera OX=7460 PE=4 SV=1
A0A088AUI7	93.98	5	3	3	104987	Uncharacterized protein OS=Apis mellifera OX=7460 PE=4 SV=1
A0A088A8P9	90.55	5	2	2	87730	Protein kinase C OS=Apis mellifera OX=7460 GN=aPKC PE=3 SV=1
A0A088A9L4	90.09	5	2	2	44477	Eukaryotic translation initiation factor 3 subunit M OS=Apis mellifera OX=7460 GN=Tango7 PE=3 SV=1
A0A088A2Y3	87.14	5	2	2	72212	Uncharacterized protein OS=Apis mellifera OX=7460 PE=4 SV=1
A0A087ZUY0	85.48	5	3	3	87358	Uncharacterized protein OS=Apis mellifera OX=7460 PE=4 SV=1
A0A087ZZD4	84.71	5	2	1	56137	Uncharacterized protein OS=Apis mellifera OX=7460 GN=LOC552617 PE=3 SV=1
A0A088A6M3	84.42	5	1	1	33461	Uncharacterized protein OS=Apis mellifera OX=7460 PE=4 SV=1
A0A088A0Y0	81.72	5	2	2	72567	Uncharacterized protein OS=Apis mellifera OX=7460 GN=LOC726432 PE=4 SV=1
A0A087ZXK7	81.28	5	2	1	64564	Uncharacterized protein OS=Apis mellifera OX=7460 GN=DDX17 PE=3 SV=1
A0A2P1DTS4	81.02	5	1	1	58027	Cytochrome c oxidase subunit 1 (Fragment) OS=Apis mellifera OX=7460 GN=COI PE=3 SV=1
A0A0S2LT70	81.02	5	1	1	59243	Cytochrome c oxidase subunit 1 OS=Apis mellifera OX=7460 GN=COX1 PE=3 SV=1
A0A347ZMT3	81.02	5	1	1	59294	Cytochrome c oxidase subunit 1 OS=Apis mellifera OX=7460 GN=COX1 PE=3 SV=1
A0A087ZTR9	80.4	5	3	3	84533	Elongation factor G mitochondrial OS=Apis mellifera OX=7460 GN=LOC411351 PE=3 SV=1
A0A088AIB9	77.76	5	2	2	84345	Glutamine-dependent NAD(+) synthetase OS=Apis mellifera OX=7460 GN=LOC409487 PE=3 SV=1
A0A0S2LSD8	77.42	5	2	2	45235	Cytochrome b OS=Apis mellifera OX=7460 GN=CYTB PE=3 SV=1
A0A347ZMU3	77.42	5	2	2	45268	Cytochrome b OS=Apis mellifera OX=7460 GN=Cytb PE=3 SV=1
A0A347ZMV6	77.42	5	2	2	45256	Cytochrome b OS=Apis mellifera OX=7460 GN=Cytb PE=3 SV=1
A0A291LR98	77.42	5	2	2	45237	Cytochrome b OS=Apis mellifera OX=7460 GN=CYTB PE=3 SV=1
A0A088ADX2	76.16	5	2	2	89395	Uncharacterized protein OS=Apis mellifera OX=7460 GN=LOC552527 PE=4 SV=1
A0A087ZSL8	75.98	5	1	1	32231	Uncharacterized protein OS=Apis mellifera OX=7460 PE=4 SV=1
A0A088A0F5	73.52	5	3	3	101520	Uncharacterized protein OS=Apis mellifera OX=7460 GN=MTA1-like PE=4 SV=1
A0A088AH95	72.46	5	2	2	64377	Uncharacterized protein OS=Apis mellifera OX=7460 GN=LOC409467 PE=3 SV=1
A0A0B4J2P1	72.4	5	1	1	42546	Phosphatidate cytidylyltransferase mitochondrial OS=Apis mellifera OX=7460 PE=3 SV=1
A0A087ZWE0	71.47	5	2	2	41625	Uncharacterized protein OS=Apis mellifera OX=7460 GN=LOC409870 PE=4 SV=1
A0A088AI77	67.81	5	3	3	96715	Uncharacterized protein OS=Apis mellifera OX=7460 GN=As PE=4 SV=1
A0A087ZZK7	67.67	5	2	2	57973	Uncharacterized protein OS=Apis mellifera OX=7460 PE=4 SV=1
A0A087ZV79	67.51	5	2	2	76996	Uncharacterized protein OS=Apis mellifera OX=7460 GN=LOC552433 PE=4 SV=1
A0A088AC30	66.99	5	1	1	39323	Uncharacterized protein OS=Apis mellifera OX=7460 GN=LOC410740 PE=4 SV=1
A0A088ANZ1	66.48	5	1	1	32688	Uncharacterized protein OS=Apis mellifera OX=7460 GN=LOC552499 PE=4 SV=1
A0A088A2H9	66.44	5	1	1	35911	Uncharacterized protein OS=Apis mellifera OX=7460 PE=4 SV=1
A0A088AQM9	66.37	5	1	1	37527	Uncharacterized protein OS=Apis mellifera OX=7460 GN=LOC413551 PE=3 SV=1
A0A088AU72	65.38	5	2	2	46395	Uncharacterized protein OS=Apis mellifera OX=7460 GN=Syt7 PE=4 SV=1
A0A087ZMY1	65.17	5	2	2	65654	Uncharacterized protein OS=Apis mellifera OX=7460 GN=LOC726040 PE=4 SV=1
A0A088AE96	64.48	5	2	2	73463	Uncharacterized protein OS=Apis mellifera OX=7460 PE=4 SV=1
A0A087ZNI4	63.89	5	2	1	58065	Uncharacterized protein OS=Apis mellifera OX=7460 PE=3 SV=1
A0A088AEK0	63.89	5	2	1	57748	Uncharacterized protein OS=Apis mellifera OX=7460 PE=3 SV=1
A0A088AKS4	63.31	5	1	1	30620	Uncharacterized protein OS=Apis mellifera OX=7460 PE=4 SV=1
A0A088AVC1	63.09	5	2	2	66208	Uncharacterized protein OS=Apis mellifera OX=7460 PE=4 SV=1
A0A088AAI5	62.86	5	2	2	45542	Uncharacterized protein OS=Apis mellifera OX=7460 GN=Catsup PE=4 SV=1
A0A088ADW0	61.39	5	1	1	37922	Uncharacterized protein OS=Apis mellifera OX=7460 GN=LOC552608 PE=4 SV=1
A0A088A6E0	60.89	5	4	4	102375	Uncharacterized protein OS=Apis mellifera OX=7460 PE=3 SV=1
Q7YXK7	60.89	5	4	4	106270	NMDA-type glutamate receptor 1 OS=Apis mellifera OX=7460 GN=Nmdar1 PE=2 SV=1
A0A087ZQW0	58.17	5	1	1	31856	Uncharacterized protein OS=Apis mellifera OX=7460 GN=Tollip PE=4 SV=1
A0A088AE63	57.88	5	2	2	76101	Uncharacterized protein OS=Apis mellifera OX=7460 PE=4 SV=1
A0A087ZXS7	57.34	5	1	1	25725	Uncharacterized protein OS=Apis mellifera OX=7460 GN=LOC726605 PE=4 SV=1
A0A088AGJ2	57.06	5	2	2	55693	Uncharacterized protein OS=Apis mellifera OX=7460 GN=LOC411694 PE=4 SV=1
A0A088A802	56.5	5	1	1	32878	Uncharacterized protein OS=Apis mellifera OX=7460 PE=3 SV=1
A0A088AFH4	53.69	5	2	2	63654	Uncharacterized protein OS=Apis mellifera OX=7460 PE=3 SV=1
A0A087ZZ68	52.88	5	1	1	36079	Uncharacterized protein OS=Apis mellifera OX=7460 PE=4 SV=1
A0A087ZXV9	52.44	5	2	2	58891	Uncharacterized protein OS=Apis mellifera OX=7460 GN=CYP9Q3 PE=3 SV=1
A0A088AFE5	51.48	5	1	1	38665	Uncharacterized protein OS=Apis mellifera OX=7460 GN=NiPp1 PE=4 SV=1
A0A088A1C2	50.46	5	1	1	48356	Uncharacterized protein OS=Apis mellifera OX=7460 GN=LOC410340 PE=4 SV=1
A0A088AMA7	49.71	5	2	2	65843	Uncharacterized protein OS=Apis mellifera OX=7460 GN=LOC410539 PE=3 SV=1
A0A088AKI4	49.47	5	1	1	53846	Uncharacterized protein OS=Apis mellifera OX=7460 GN=LOC412116 PE=4 SV=1
A0A088ASH3	49.11	5	1	1	27030	Uncharacterized protein OS=Apis mellifera OX=7460 GN=LOC725260 PE=4 SV=1
A0A088AH79	48.14	5	2	2	79459	Uncharacterized protein OS=Apis mellifera OX=7460 GN=LOC412077 PE=4 SV=1
A0A088ABZ2	47.85	5	1	1	25454	Uncharacterized protein OS=Apis mellifera OX=7460 GN=LOC552153 PE=4 SV=1
A0A088AUG1	47.82	5	1	1	26229	Tetraspanin OS=Apis mellifera OX=7460 GN=Tspan13 PE=3 SV=1
A0A088A8F3	47.3	5	1	1	28588	ER membrane protein complex subunit 3 OS=Apis mellifera OX=7460 GN=LOC551505 PE=3 SV=1
A0A088A3A8	47.17	5	2	2	48944	Uncharacterized protein OS=Apis mellifera OX=7460 GN=LOC414028 PE=4 SV=1
A0A088AJX4	45.49	5	1	1	27885	Uncharacterized protein OS=Apis mellifera OX=7460 GN=LOC725318 PE=4 SV=1
A0A087ZUX7	44.83	5	1	1	34598	Uncharacterized protein OS=Apis mellifera OX=7460 PE=4 SV=1
A0A088AT34	44.51	5	1	1	35519	Uncharacterized protein OS=Apis mellifera OX=7460 GN=LOC550789 PE=4 SV=1
A0A088A0Q7	44.05	5	2	2	48792	Uncharacterized protein OS=Apis mellifera OX=7460 PE=4 SV=1
A0A088ADS8	43.63	5	1	1	38694	Uncharacterized protein OS=Apis mellifera OX=7460 PE=3 SV=1
A0A088A3I4	43.57	5	1	1	44342	Uncharacterized protein OS=Apis mellifera OX=7460 GN=LOC551790 PE=4 SV=1
A0A087ZT72	43.57	5	1	1	26475	Uncharacterized protein OS=Apis mellifera OX=7460 GN=LOC725171 PE=4 SV=1
A0A087ZN42	43.42	5	1	1	27809	Peptidyl-prolyl cis-trans isomerase OS=Apis mellifera OX=7460 GN=LOC408428 PE=3 SV=1
A0A088AET5	43.39	5	1	1	41103	Uncharacterized protein OS=Apis mellifera OX=7460 GN=mRpL1 PE=4 SV=1
A0A087ZQL8	43.25	5	2	2	59287	RBR-type E3 ubiquitin transferase OS=Apis mellifera OX=7460 GN=LOC413468 PE=3 SV=1
A0A087ZYR0	42.65	5	1	1	55066	Uncharacterized protein OS=Apis mellifera OX=7460 PE=4 SV=1
A0A087ZVY3	41.72	5	1	1	22686	Uncharacterized protein OS=Apis mellifera OX=7460 GN=LOC408601 PE=4 SV=1
A0A087ZYS5	41.47	5	1	1	42940	Uncharacterized protein OS=Apis mellifera OX=7460 GN=LOC725703 PE=4 SV=1
A0A088AVJ7	39.72	5	1	1	31460	Uncharacterized protein OS=Apis mellifera OX=7460 PE=4 SV=1
A0A088A2B8	39.45	5	1	1	40043	Uncharacterized protein OS=Apis mellifera OX=7460 PE=4 SV=1
A0A088A959	39.15	5	1	1	20688	Uncharacterized protein OS=Apis mellifera OX=7460 GN=LOC726995 PE=4 SV=1
A0A087ZZR0	38.7	5	1	1	65768	Replication protein A subunit OS=Apis mellifera OX=7460 PE=3 SV=1
A0A088ABP9	38.54	5	1	1	25054	Uncharacterized protein OS=Apis mellifera OX=7460 GN=mats PE=4 SV=1
A0A088A1C7	38.24	5	1	1	41703	Uncharacterized protein OS=Apis mellifera OX=7460 PE=4 SV=1
A0A088AVS3	38.23	5	1	1	35754	Uncharacterized protein OS=Apis mellifera OX=7460 GN=LOC413314 PE=4 SV=1
A0A088ARH8	37.38	5	1	1	35170	Uncharacterized protein OS=Apis mellifera OX=7460 PE=4 SV=1
A0A087ZQS0	37.34	5	1	1	31536	Uncharacterized protein OS=Apis mellifera OX=7460 PE=4 SV=1
A0A088ANP8	37.31	5	1	1	39113	Uncharacterized protein OS=Apis mellifera OX=7460 GN=LOC551842 PE=4 SV=1
A0A088AW65	35.6	5	1	1	25451	Uncharacterized protein OS=Apis mellifera OX=7460 GN=Rab-RP4 PE=4 SV=1
A0A088AME4	35.31	5	1	1	24575	Uncharacterized protein OS=Apis mellifera OX=7460 GN=LOC410533 PE=4 SV=1
A0A088AQV7	35.2	5	1	1	36814	Uncharacterized protein OS=Apis mellifera OX=7460 GN=LOC411795 PE=4 SV=1
A0A087ZZ25	34.99	5	1	1	33825	Uncharacterized protein OS=Apis mellifera OX=7460 GN=LOC408789 PE=4 SV=1
A0A088AHX2	34.67	5	1	1	38683	Uncharacterized protein OS=Apis mellifera OX=7460 PE=4 SV=1
A0A087ZR01	33.89	5	1	1	29530	Uncharacterized protein OS=Apis mellifera OX=7460 GN=Cpap3-c PE=4 SV=1
Q9Y1C4	33.61	5	1	1	18081	Putative Ets-family protein (Fragment) OS=Apis mellifera OX=7460 PE=2 SV=1
A0A088AQ87	33.03	5	1	1	38870	Uncharacterized protein OS=Apis mellifera OX=7460 GN=409768 PE=4 SV=1
A0A087ZT32	32.81	5	1	1	38925	Uncharacterized protein OS=Apis mellifera OX=7460 GN=LOC550698 PE=3 SV=1
A0A088AJ73	31.31	5	1	1	31917	Uncharacterized protein OS=Apis mellifera OX=7460 PE=4 SV=1
A0A087ZN61	31.15	5	1	1	60391	Uncharacterized protein OS=Apis mellifera OX=7460 GN=100576924 PE=4 SV=1
A0A088AVN6	29.28	5	1	1	22776	Vesicle transport protein OS=Apis mellifera OX=7460 GN=LOC411493 PE=3 SV=1
A0A088AT17	28.38	5	1	1	28655	Uncharacterized protein OS=Apis mellifera OX=7460 GN=LOC410754 PE=4 SV=1
A0A088AU73	28.35	5	1	1	58908	Fatty acyl-CoA reductase OS=Apis mellifera OX=7460 GN=100576414 PE=3 SV=1
D9MWM8	28.35	5	1	1	58869	Fatty acyl-CoA reductase OS=Apis mellifera OX=7460 PE=2 SV=1
A0A088AGX3	28.32	5	1	1	26978	Uncharacterized protein OS=Apis mellifera OX=7460 GN=LOC725506 PE=4 SV=1
A0A088AL91	27.83	5	1	1	48232	Uncharacterized protein OS=Apis mellifera OX=7460 GN=Hr78 PE=3 SV=1
A0A0B4J2N3	27.81	5	1	1	16275	Uncharacterized protein OS=Apis mellifera OX=7460 GN=mbf1 PE=4 SV=1
A0A088A7J0	27.79	5	1	1	34528	Uncharacterized protein OS=Apis mellifera OX=7460 PE=4 SV=1
A0A087ZPQ1	27.74	5	1	1	24878	CDP-diacylglycerol--inositol 3-phosphatidyltransferase OS=Apis mellifera OX=7460 GN=LOC411408 PE=3 SV=1
A0A087ZNF8	27.73	5	1	1	25501	Uncharacterized protein OS=Apis mellifera OX=7460 GN=LOC552600 PE=4 SV=1
A0A088AHD0	27.62	5	1	1	19082	Uncharacterized protein OS=Apis mellifera OX=7460 GN=102656594 PE=4 SV=1
A0A088AUZ8	27.06	5	1	1	36819	Uncharacterized protein OS=Apis mellifera OX=7460 PE=4 SV=1
A0A0B4J2M9	26.85	5	1	1	29899	Pyrroline-5-carboxylate reductase OS=Apis mellifera OX=7460 GN=LOC412234 PE=3 SV=1
A0A088ABT1	26.74	5	1	1	30321	Uncharacterized protein OS=Apis mellifera OX=7460 GN=102656657 PE=4 SV=1
A0A087ZVJ8	26.74	5	1	1	35637	Uncharacterized protein OS=Apis mellifera OX=7460 GN=LOC409005 PE=4 SV=1
A0A088A412	188.68	6	3	3	89767	Uncharacterized protein OS=Apis mellifera OX=7460 PE=4 SV=1
A0A088A3I1	162.21	6	10	10	277154	Uncharacterized protein OS=Apis mellifera OX=7460 GN=LOC551620 PE=4 SV=1
A0A088AAV2	159.23	6	3	3	105866	Uncharacterized protein OS=Apis mellifera OX=7460 PE=4 SV=1
A0A087ZPW6	151.53	6	4	4	86613	Uncharacterized protein OS=Apis mellifera OX=7460 PE=4 SV=1
A0A087ZWJ6	144.56	6	6	6	198923	Uncharacterized protein OS=Apis mellifera OX=7460 GN=Nup98 PE=4 SV=1
A0A088AFQ2	135.18	6	3	3	81103	Uncharacterized protein OS=Apis mellifera OX=7460 GN=LOC408836 PE=4 SV=1
A0A088AHZ7	130.85	6	4	4	149589	Uncharacterized protein OS=Apis mellifera OX=7460 PE=4 SV=1
A0A088AHX7	127.5	6	5	5	176228	Uncharacterized protein OS=Apis mellifera OX=7460 PE=4 SV=1
A0A088A069	127.42	6	4	4	135069	Uncharacterized protein OS=Apis mellifera OX=7460 PE=4 SV=1
A0A088AUR2	124.98	6	3	3	74788	Uncharacterized protein OS=Apis mellifera OX=7460 GN=LOC409086 PE=4 SV=1
A0A087ZTR6	123.73	6	5	5	142795	Anion exchange protein OS=Apis mellifera OX=7460 GN=LOC409792 PE=3 SV=1
A0A088AR40	120.09	6	4	4	123486	Vacuolar protein sorting-associated protein 11 homolog OS=Apis mellifera OX=7460 GN=LOC410493 PE=3 SV=1
A0A088AI46	116.5	6	3	3	79559	Transporter OS=Apis mellifera OX=7460 GN=NT-7 PE=3 SV=1
A0A088AAB7	116.43	6	3	3	114498	Uncharacterized protein OS=Apis mellifera OX=7460 GN=LOC413683 PE=4 SV=1
A0A088AMD3	114.25	6	3	3	91634	Uncharacterized protein OS=Apis mellifera OX=7460 PE=3 SV=1
A0A087ZXV1	110.48	6	4	4	101315	Uncharacterized protein OS=Apis mellifera OX=7460 PE=4 SV=1
Q0GQR4	109.03	6	3	3	51791	Glutamate-gated chloride channel OS=Apis mellifera OX=7460 PE=2 SV=1
Q0GQR3	109.03	6	3	3	51807	Glutamate-gated chloride channel OS=Apis mellifera OX=7460 PE=2 SV=1
A0A088A196	107.15	6	2	2	42785	Uncharacterized protein OS=Apis mellifera OX=7460 GN=LOC552303 PE=4 SV=1
A0A087ZY15	106.43	6	2	1	35375	Uncharacterized protein OS=Apis mellifera OX=7460 PE=4 SV=1
A0A088ASG3	105.67	6	3	3	90599	Uncharacterized protein OS=Apis mellifera OX=7460 PE=4 SV=1
Q6TLC7	105.32	6	4	3	72811	Transporter OS=Apis mellifera OX=7460 GN=GAT-1B PE=2 SV=1
A0A088A5U8	103.8	6	3	3	86529	Uncharacterized protein OS=Apis mellifera OX=7460 PE=4 SV=1
A0A087ZRP6	103.44	6	3	3	69710	Uncharacterized protein OS=Apis mellifera OX=7460 PE=4 SV=1
A0A087ZP46	100.57	6	2	2	60842	Uncharacterized protein OS=Apis mellifera OX=7460 PE=4 SV=1
A0A088AHD6	99.61	6	3	3	92476	Uncharacterized protein OS=Apis mellifera OX=7460 PE=4 SV=1
A0A088AAM9	97.33	6	3	3	80234	Uncharacterized protein OS=Apis mellifera OX=7460 GN=Appl PE=4 SV=1
A0A087ZP72	97.25	6	2	2	59750	Uncharacterized protein OS=Apis mellifera OX=7460 GN=LOC409089 PE=4 SV=1
A0A088AFY8	95.18	6	2	2	64430	Uncharacterized protein OS=Apis mellifera OX=7460 GN=LOC408811 PE=4 SV=1
A0A088ADL7	94.37	6	3	3	53874	Uncharacterized protein OS=Apis mellifera OX=7460 GN=LOC408817 PE=3 SV=1
A0A088AMR8	91.49	6	3	3	67426	Uncharacterized protein OS=Apis mellifera OX=7460 GN=LOC412540 PE=4 SV=1
A0A087ZWM1	90.75	6	2	2	55001	Uncharacterized protein OS=Apis mellifera OX=7460 PE=4 SV=1
A0A088A7K4	90.43	6	1	1	33526	Uncharacterized protein OS=Apis mellifera OX=7460 GN=LOC551421 PE=4 SV=1
A0A088A0Y8	88.73	6	2	2	53916	Uncharacterized protein OS=Apis mellifera OX=7460 PE=4 SV=1
A0A088ARM0	87.3	6	1	1	34740	Uncharacterized protein OS=Apis mellifera OX=7460 PE=4 SV=1
A0A088AQX6	86.65	6	2	2	52054	Uncharacterized protein OS=Apis mellifera OX=7460 PE=3 SV=1
A0A088AHN3	86.33	6	4	4	80844	Uncharacterized protein OS=Apis mellifera OX=7460 PE=4 SV=1
A0A088A5R4	85.93	6	1	1	35882	Uncharacterized protein OS=Apis mellifera OX=7460 GN=LOC413311 PE=4 SV=1
A0A088A6Q8	85.33	6	3	3	65831	Uncharacterized protein OS=Apis mellifera OX=7460 GN=LOC410922 PE=4 SV=1
A0A087ZTY5	78.89	6	2	2	72375	Uncharacterized protein OS=Apis mellifera OX=7460 GN=Prpf3 PE=4 SV=1
A0A088AQ84	78.77	6	3	3	95535	Uncharacterized protein OS=Apis mellifera OX=7460 GN=LOC412681 PE=3 SV=1
A0A088AT95	77.58	6	2	2	65580	Uncharacterized protein OS=Apis mellifera OX=7460 GN=LOC551889 PE=4 SV=1
A0A0B4J2P4	77.21	6	1	1	52203	Uncharacterized protein OS=Apis mellifera OX=7460 PE=3 SV=1
A0A088A5A4	77.1	6	3	3	115135	Uncharacterized protein OS=Apis mellifera OX=7460 GN=Chro PE=4 SV=1
A0A087ZPA7	76.83	6	3	3	75810	Sodium/hydrogen exchanger OS=Apis mellifera OX=7460 PE=3 SV=1
A0A088A431	75.6	6	1	1	33503	Uncharacterized protein OS=Apis mellifera OX=7460 PE=3 SV=1
A0A088ARU9	75.27	6	2	2	79608	Glycogen [starch] synthase OS=Apis mellifera OX=7460 GN=LOC552328 PE=3 SV=1
A0A088A9C2	75	6	2	2	50580	Uncharacterized protein OS=Apis mellifera OX=7460 GN=LOC413354 PE=4 SV=1
A0A087ZZY4	74.58	6	1	1	27438	Uncharacterized protein OS=Apis mellifera OX=7460 PE=4 SV=1
A0A087ZQY3	74.39	6	2	2	70552	Uncharacterized protein OS=Apis mellifera OX=7460 GN=LOC551137 PE=4 SV=1
A0A088ACE9	73.65	6	1	1	31111	Uncharacterized protein OS=Apis mellifera OX=7460 GN=LOC410076 PE=4 SV=1
A0A087ZUG3	72.28	6	1	1	56170	Uncharacterized protein OS=Apis mellifera OX=7460 PE=4 SV=1
A0A087ZTA3	71.77	6	2	2	36281	Uncharacterized protein OS=Apis mellifera OX=7460 GN=LOC411081 PE=4 SV=1
A0A088ACU2	71.13	6	2	2	47621	Uncharacterized protein OS=Apis mellifera OX=7460 GN=CTL1 PE=4 SV=1
A0A087ZYN6	71.12	6	3	3	139653	Uncharacterized protein OS=Apis mellifera OX=7460 GN=LOC725665 PE=4 SV=1
A0A087ZZN7	71.01	6	1	1	28763	Uncharacterized protein OS=Apis mellifera OX=7460 GN=LOC412443 PE=4 SV=1
A0A088AFN8	69.66	6	1	1	55051	Signal recognition particle 54 kDa protein OS=Apis mellifera OX=7460 GN=LOC552114 PE=3 SV=1
A0A088A100	66.4	6	1	1	38259	Uncharacterized protein OS=Apis mellifera OX=7460 GN=LOC551146 PE=4 SV=1
A0A088AN00	65.93	6	2	2	89336	Uncharacterized protein OS=Apis mellifera OX=7460 PE=4 SV=1
A0A088AG10	65.06	6	2	2	61141	Uncharacterized protein OS=Apis mellifera OX=7460 PE=4 SV=1
A0A088AUK5	64.97	6	1	1	72121	Uncharacterized protein OS=Apis mellifera OX=7460 PE=4 SV=1
A0A088AKH0	63.94	6	1	1	41074	Uncharacterized protein OS=Apis mellifera OX=7460 PE=3 SV=1
A0A088AAU0	60.84	6	2	2	51115	Uncharacterized protein OS=Apis mellifera OX=7460 PE=4 SV=1
A0A088AM42	60.67	6	1	1	26821	Uncharacterized protein OS=Apis mellifera OX=7460 PE=4 SV=1
A0A087ZTD8	60.58	6	1	1	17897	Uncharacterized protein OS=Apis mellifera OX=7460 GN=LOC552441 PE=4 SV=1
A0A087ZYZ6	59.87	6	2	2	50749	Uncharacterized protein OS=Apis mellifera OX=7460 GN=LOC410999 PE=4 SV=1
A0A088AHY6	59.72	6	2	2	60313	Uncharacterized protein OS=Apis mellifera OX=7460 PE=4 SV=1
A0A087ZP87	59.55	6	1	1	23309	Uncharacterized protein OS=Apis mellifera OX=7460 GN=102655603 PE=3 SV=1
A0A088ACD8	58.35	6	1	1	25987	Uncharacterized protein OS=Apis mellifera OX=7460 GN=LOC410969 PE=4 SV=1
A0A088AK95	56.78	6	1	1	25121	Uncharacterized protein OS=Apis mellifera OX=7460 GN=LOC552190 PE=4 SV=1
A0A087ZZT7	55.14	6	2	2	49769	Uncharacterized protein OS=Apis mellifera OX=7460 GN=mRpS5 PE=4 SV=1
A0A088APJ0	55.12	6	2	2	53715	Uncharacterized protein OS=Apis mellifera OX=7460 GN=LOC411145 PE=4 SV=1
A0A088ATE8	54.16	6	1	1	21379	Uncharacterized protein OS=Apis mellifera OX=7460 GN=LOC550992 PE=4 SV=1
A0A088A5K6	53.85	6	1	1	53369	Uncharacterized protein OS=Apis mellifera OX=7460 GN=LOC408701 PE=3 SV=1
A0A088AP92	53.45	6	2	2	56124	Histone deacetylase OS=Apis mellifera OX=7460 GN=HDAC1 PE=3 SV=1
A0A087ZV96	53.36	6	1	1	35162	Uncharacterized protein OS=Apis mellifera OX=7460 GN=LOC411879 PE=4 SV=1
A0A088ADR8	52.95	6	1	1	57387	Uncharacterized protein OS=Apis mellifera OX=7460 GN=LOC409560 PE=4 SV=1
A0A087ZS22	52.84	6	2	2	60787	Uncharacterized protein OS=Apis mellifera OX=7460 GN=LOC408478 PE=3 SV=1
A0A088AUW1	51.62	6	1	1	42369	Uncharacterized protein OS=Apis mellifera OX=7460 GN=Fibp PE=4 SV=1
A0A087ZQA2	51.57	6	2	2	47048	Dipeptidase OS=Apis mellifera OX=7460 PE=3 SV=1
A0A088AB14	51.46	6	2	2	60687	Uncharacterized protein OS=Apis mellifera OX=7460 GN=LOC409617 PE=4 SV=1
A0A087ZQ62	51.38	6	2	2	83556	Cleavage and polyadenylation specificity factor subunit 2 OS=Apis mellifera OX=7460 GN=Cpsf100 PE=3 SV=1
A0A088AUN2	50.94	6	1	1	27366	Uncharacterized protein OS=Apis mellifera OX=7460 GN=LOC410838 PE=3 SV=1
A0A088A2H3	50.46	6	1	1	21890	Uncharacterized protein OS=Apis mellifera OX=7460 GN=LOC552159 PE=4 SV=1
A0A088AV16	49.45	6	1	1	37193	Uncharacterized protein OS=Apis mellifera OX=7460 GN=LOC552562 PE=4 SV=1
A0A088A5B9	48.72	6	1	1	46613	Uncharacterized protein OS=Apis mellifera OX=7460 GN=LOC409571 PE=4 SV=1
A0A088AE71	44.53	6	1	1	28623	Vacuolar-sorting protein SNF8 OS=Apis mellifera OX=7460 GN=lsn PE=3 SV=1
A0A087ZXS4	44.17	6	1	1	25284	Uncharacterized protein OS=Apis mellifera OX=7460 GN=CTL11 PE=4 SV=1
A0A088AJI7	43.66	6	1	1	32461	Geranylgeranyl transferase type-2 subunit beta OS=Apis mellifera OX=7460 PE=3 SV=1
A0A087ZZD9	43.18	6	1	1	27293	Uncharacterized protein OS=Apis mellifera OX=7460 GN=LOC409272 PE=4 SV=1
A0A087ZNT4	42.68	6	1	1	28697	Uncharacterized protein OS=Apis mellifera OX=7460 GN=100577582 PE=4 SV=1
A0A088A7K3	42.57	6	1	1	35443	Uncharacterized protein OS=Apis mellifera OX=7460 GN=LOC727078 PE=4 SV=1
A0A088A267	42.43	6	1	1	32294	Uncharacterized protein OS=Apis mellifera OX=7460 GN=LOC551098 PE=4 SV=1
A0A087ZPW9	42.36	6	1	1	20358	Signal peptidase complex subunit 3 OS=Apis mellifera OX=7460 GN=Spase22-23 PE=3 SV=1
A0A088A1F7	41.5	6	1	1	28703	Uncharacterized protein OS=Apis mellifera OX=7460 PE=4 SV=1
A0A087ZSC5	40.18	6	1	1	22422	Uncharacterized protein OS=Apis mellifera OX=7460 GN=mRpS34 PE=4 SV=1
A0A088ATB5	39.77	6	1	1	36278	Uncharacterized protein OS=Apis mellifera OX=7460 GN=LOC409189 PE=3 SV=1
A0A087ZRN4	39.68	6	1	1	31916	Uncharacterized protein OS=Apis mellifera OX=7460 GN=LOC551178 PE=4 SV=1
A0A088ATH4	39.05	6	1	1	33803	Uncharacterized protein OS=Apis mellifera OX=7460 GN=LOC411882 PE=4 SV=1
A0A087ZPN3	38.43	6	1	1	25370	Tetraspanin OS=Apis mellifera OX=7460 PE=3 SV=1
Q9NB07	38.43	6	1	1	25326	Tetraspanin OS=Apis mellifera OX=7460 PE=2 SV=1
A0A088AUJ7	37.07	6	1	1	25426	Uncharacterized protein OS=Apis mellifera OX=7460 GN=LOC724554 PE=4 SV=1
A0A088AGJ0	36.5	6	1	1	22513	Uncharacterized protein OS=Apis mellifera OX=7460 GN=mRpL43 PE=4 SV=1
A0A088A654	36.2	6	1	1	20069	Uncharacterized protein OS=Apis mellifera OX=7460 GN=100577000 PE=4 SV=1
A0A088AB54	35.79	6	1	1	31968	Uncharacterized protein OS=Apis mellifera OX=7460 GN=LOC725866 PE=4 SV=1
A0A088A6M4	35.76	6	1	1	29202	Derlin OS=Apis mellifera OX=7460 GN=727262 PE=3 SV=1
A0A088ALK8	35.17	6	1	1	21486	Uncharacterized protein OS=Apis mellifera OX=7460 PE=4 SV=1
A0A088AKC1	35.08	6	1	1	18405	Uncharacterized protein OS=Apis mellifera OX=7460 PE=4 SV=1
A0A088A0A8	34.44	6	1	1	29643	Uncharacterized protein OS=Apis mellifera OX=7460 GN=LOC408847 PE=4 SV=1
A0A087ZSH1	34.07	6	1	1	18560	Uncharacterized protein OS=Apis mellifera OX=7460 GN=LOC726411 PE=4 SV=1
A0A088A8A8	32.99	6	1	1	31371	Uncharacterized protein OS=Apis mellifera OX=7460 PE=4 SV=1
A0A088ATH3	32.95	6	1	1	33617	Uncharacterized protein OS=Apis mellifera OX=7460 GN=LOC725460 PE=4 SV=1
U3KR34	30.8	6	1	1	20663	Uncharacterized protein OS=Apis mellifera OX=7460 GN=LOC552295 PE=4 SV=1
A0A088A2A3	30.7	6	1	1	33239	Kynurenine formamidase OS=Apis mellifera OX=7460 GN=LOC726754 PE=3 SV=1
A0A088AI91	30.6	6	1	1	44003	Uncharacterized protein OS=Apis mellifera OX=7460 GN=LOC552417 PE=3 SV=1
A0A088AFU6	29.62	6	1	1	36324	Uncharacterized protein OS=Apis mellifera OX=7460 PE=4 SV=1
A0A088AVK4	29.44	6	1	1	20277	Peptidyl-prolyl cis-trans isomerase OS=Apis mellifera OX=7460 GN=LOC726409 PE=3 SV=1
A0A087ZSF5	28.93	6	1	1	22422	Uncharacterized protein OS=Apis mellifera OX=7460 GN=LOC408477 PE=4 SV=1
A0A088ACB8	28.09	6	1	1	22900	Uncharacterized protein OS=Apis mellifera OX=7460 PE=4 SV=1
A0A087ZT30	28.02	6	1	1	25134	Uncharacterized protein OS=Apis mellifera OX=7460 GN=LOC551696 PE=4 SV=1
A0A088ANT1	26.9	6	1	1	27349	Uncharacterized protein OS=Apis mellifera OX=7460 PE=4 SV=1
A0A088A5Z8	231.06	7	14	14	294823	Ubiquitin carboxyl-terminal hydrolase OS=Apis mellifera OX=7460 GN=faf PE=3 SV=1
A0A088AU48	193.14	7	9	9	238902	Uncharacterized protein OS=Apis mellifera OX=7460 GN=408342 PE=4 SV=1
A0A088AIJ8	181.95	7	13	13	372815	Uncharacterized protein OS=Apis mellifera OX=7460 PE=4 SV=1
A0A087ZVV1	177.2	7	9	9	224508	Phosphoinositide phospholipase C OS=Apis mellifera OX=7460 PE=4 SV=1
A0A087ZSV8	177.02	7	6	6	160143	Uncharacterized protein OS=Apis mellifera OX=7460 PE=4 SV=1
A0A087ZRF5	173.14	7	4	4	97262	Uncharacterized protein OS=Apis mellifera OX=7460 PE=4 SV=1
A0A087ZSP9	166.6	7	6	6	151026	Uncharacterized protein OS=Apis mellifera OX=7460 GN=552552 PE=3 SV=1
A0A088A2K6	160.1	7	3	3	75784	Uncharacterized protein OS=Apis mellifera OX=7460 GN=LOC412777 PE=3 SV=1
A0A088A060	158.96	7	6	6	121672	Uncharacterized protein OS=Apis mellifera OX=7460 PE=4 SV=1
A0A088AVA3	158.63	7	6	6	136406	Phospholipid-transporting ATPase OS=Apis mellifera OX=7460 GN=LOC552074 PE=3 SV=1
A0A088ANU5	150.13	7	4	4	58382	Uncharacterized protein OS=Apis mellifera OX=7460 GN=LOC550691 PE=4 SV=1
A0A087ZWA3	147.39	7	6	6	144013	Uncharacterized protein OS=Apis mellifera OX=7460 PE=3 SV=1
A0A088AM62	144.88	7	4	4	111284	Uncharacterized protein OS=Apis mellifera OX=7460 GN=LOC726483 PE=3 SV=1
A0A088AIQ6	136.06	7	6	6	140128	Uncharacterized protein OS=Apis mellifera OX=7460 PE=4 SV=1
A0A088A629	134.85	7	2	2	51486	Uncharacterized protein OS=Apis mellifera OX=7460 GN=LOC408828 PE=4 SV=1
A0A088AP40	133.9	7	5	5	105276	Uncharacterized protein OS=Apis mellifera OX=7460 PE=3 SV=1
A0A088A9P3	130.72	7	6	6	121472	Uncharacterized protein OS=Apis mellifera OX=7460 GN=LOC412817 PE=4 SV=1
A0A087ZV93	129.8	7	5	5	135144	Uncharacterized protein OS=Apis mellifera OX=7460 GN=LOC411923 PE=3 SV=1
A0A088ABZ7	123.99	7	4	4	117862	Uncharacterized protein OS=Apis mellifera OX=7460 PE=4 SV=1
A0A088AD87	123.61	7	4	4	98312	Uncharacterized protein OS=Apis mellifera OX=7460 PE=4 SV=1
A0A087ZYG3	123.48	7	2	2	56428	Uncharacterized protein OS=Apis mellifera OX=7460 GN=LOC411889 PE=4 SV=1
A0A087ZNT8	123.04	7	2	2	23443	Uncharacterized protein OS=Apis mellifera OX=7460 PE=3 SV=1
A0A088AS25	122.04	7	3	3	43042	Uncharacterized protein OS=Apis mellifera OX=7460 PE=4 SV=1
A0A088AQQ2	116.3	7	6	6	123900	Uncharacterized protein OS=Apis mellifera OX=7460 PE=4 SV=1
A0A088A0G6	114.98	7	4	4	92764	Uncharacterized protein OS=Apis mellifera OX=7460 GN=flfl PE=4 SV=1
A0A088A2B7	114.62	7	3	3	99815	Uncharacterized protein OS=Apis mellifera OX=7460 PE=4 SV=1
A0A088A4T6	112.53	7	5	4	99326	Transporter OS=Apis mellifera OX=7460 GN=NT-5 PE=3 SV=1
A0A088A432	109.79	7	5	5	103277	Uncharacterized protein OS=Apis mellifera OX=7460 PE=4 SV=1
A0A088ASK2	106.11	7	3	3	104878	Uncharacterized protein OS=Apis mellifera OX=7460 PE=4 SV=1
A0A087ZNB0	102.43	7	2	2	57153	Uncharacterized protein OS=Apis mellifera OX=7460 GN=LOC409955 PE=4 SV=1
A0A088AHB9	102.02	7	3	3	77073	Solute carrier organic anion transporter family member OS=Apis mellifera OX=7460 GN=LOC409649 PE=3 SV=1
A0A088AEZ6	100.99	7	4	4	91370	Uncharacterized protein OS=Apis mellifera OX=7460 PE=3 SV=1
A0A088AEQ2	99.16	7	4	4	94747	Uncharacterized protein OS=Apis mellifera OX=7460 PE=4 SV=1
A0A087ZW76	98.12	7	3	3	64070	Uncharacterized protein OS=Apis mellifera OX=7460 PE=4 SV=1
A0A088ABX8	96.79	7	2	2	56769	Uncharacterized protein OS=Apis mellifera OX=7460 PE=4 SV=1
A0A088AD82	96.5	7	2	2	67929	Uncharacterized protein OS=Apis mellifera OX=7460 GN=551474 PE=4 SV=1
A0A088ANW9	94.89	7	2	2	57286	Uncharacterized protein OS=Apis mellifera OX=7460 GN=LOC408989 PE=3 SV=1
A0A088ARB9	94.65	7	3	3	67565	Uncharacterized protein OS=Apis mellifera OX=7460 PE=4 SV=1
A0A088A1K6	93.78	7	2	2	35119	Uncharacterized protein OS=Apis mellifera OX=7460 GN=107963960 PE=4 SV=1
A0A087ZXP3	91.69	7	2	2	52608	Uncharacterized protein OS=Apis mellifera OX=7460 PE=3 SV=1
A0A087ZS28	91.09	7	4	4	116024	Putative ATP-dependent RNA helicase DDX46-like protein OS=Apis mellifera OX=7460 GN=LOC727008 PE=4 SV=1
A0A088A7Q3	90.09	7	3	3	80082	Uncharacterized protein OS=Apis mellifera OX=7460 GN=Hdc PE=4 SV=1
A0A088A291	89.9	7	5	5	110301	Uncharacterized protein OS=Apis mellifera OX=7460 GN=Cas PE=4 SV=1
A0A088A9T9	88.34	7	2	2	55930	Uncharacterized protein OS=Apis mellifera OX=7460 GN=LOC408902 PE=4 SV=1
A0A088AQ71	88.15	7	3	3	73365	Uncharacterized protein OS=Apis mellifera OX=7460 GN=LOC411227 PE=4 SV=1
A0A087ZRK7	87.5	7	2	2	75347	Uncharacterized protein OS=Apis mellifera OX=7460 PE=4 SV=1
A0A087ZSV1	87.14	7	2	2	42202	Uncharacterized protein OS=Apis mellifera OX=7460 PE=4 SV=1
A0A087ZY90	84.04	7	2	2	46435	Uncharacterized protein OS=Apis mellifera OX=7460 GN=LOC413006 PE=4 SV=1
A0A088A8X1	81.37	7	2	2	66603	Uncharacterized protein OS=Apis mellifera OX=7460 GN=LOC411122 PE=4 SV=1
A0A087ZUE4	80.27	7	2	2	36472	Uncharacterized protein OS=Apis mellifera OX=7460 PE=3 SV=1
A0A088AJ83	79.46	7	3	3	51556	Uncharacterized protein OS=Apis mellifera OX=7460 GN=LOC409062 PE=4 SV=1
C9WMM5	78.92	7	3	3	53703	Venom serine carboxypeptidase OS=Apis mellifera OX=7460 PE=2 SV=1
A0A088ALS1	78.65	7	1	1	39109	Uroporphyrinogen decarboxylase OS=Apis mellifera OX=7460 PE=3 SV=1
A0A088AT21	76.02	7	4	4	77420	Uncharacterized protein OS=Apis mellifera OX=7460 GN=Aats-arg PE=3 SV=1
A0A088A0U5	75.39	7	1	1	48137	Uncharacterized protein OS=Apis mellifera OX=7460 GN=CstF-64 PE=4 SV=1
A0A088A0E6	74.96	7	2	2	59682	Uncharacterized protein OS=Apis mellifera OX=7460 GN=LOC411105 PE=4 SV=1
A0A088A8Z9	74.47	7	2	2	77514	Uncharacterized protein OS=Apis mellifera OX=7460 PE=4 SV=1
A0A087ZNA9	74.13	7	2	2	49503	Uncharacterized protein OS=Apis mellifera OX=7460 GN=Aats-ser PE=4 SV=1
A0A088A3I9	73.73	7	2	2	41753	Uncharacterized protein OS=Apis mellifera OX=7460 GN=LOC409755 PE=4 SV=1
A0A087ZQM0	73.19	7	2	2	60532	Uncharacterized protein OS=Apis mellifera OX=7460 GN=LOC409924 PE=4 SV=1
A0A088AGA7	72	7	3	3	65860	Uncharacterized protein OS=Apis mellifera OX=7460 GN=LOC409270 PE=4 SV=1
A0A088A1P1	70.3	7	2	2	42865	Uncharacterized protein OS=Apis mellifera OX=7460 GN=LOC410338 PE=4 SV=1
A0A087ZVW5	69.83	7	1	1	24728	Uncharacterized protein OS=Apis mellifera OX=7460 GN=LOC409129 PE=4 SV=1
A0A088APS1	69.13	7	2	2	50119	Uncharacterized protein OS=Apis mellifera OX=7460 GN=lkb1 PE=3 SV=1
A0A088A2S7	68.49	7	1	1	36761	Uncharacterized protein OS=Apis mellifera OX=7460 GN=LOC552089 PE=4 SV=1
A0A087ZRD5	66.73	7	2	2	46389	Uncharacterized protein OS=Apis mellifera OX=7460 GN=LOC412303 PE=4 SV=1
A0A088ADN7	66.14	7	2	2	57205	Uncharacterized protein OS=Apis mellifera OX=7460 PE=4 SV=1
Q2V0C9	63.19	7	2	2	56221	Cystathionine beta-synthase OS=Apis mellifera OX=7460 GN=AmCBS PE=1 SV=1
A0A087ZYT8	61.04	7	1	1	23050	Uncharacterized protein OS=Apis mellifera OX=7460 GN=726308 PE=4 SV=1
A0A088AEY7	59.21	7	2	2	44140	Uncharacterized protein OS=Apis mellifera OX=7460 GN=Smyd5 PE=4 SV=1
A0A088A6C4	59.04	7	2	2	51698	Uncharacterized protein OS=Apis mellifera OX=7460 GN=LOC410965 PE=4 SV=1
A0A087ZQK2	56.63	7	2	2	42876	Uncharacterized protein OS=Apis mellifera OX=7460 GN=LOC409607 PE=4 SV=1
A0A088AQW7	56.55	7	2	2	40846	Uncharacterized protein OS=Apis mellifera OX=7460 GN=LOC552085 PE=4 SV=1
A0A088A040	55.17	7	2	2	47014	Uncharacterized protein OS=Apis mellifera OX=7460 GN=LOC412286 PE=4 SV=1
A0A088A4F2	55.06	7	1	1	20698	Uncharacterized protein OS=Apis mellifera OX=7460 PE=4 SV=1
A0A088AFF2	55.06	7	1	1	21259	Uncharacterized protein OS=Apis mellifera OX=7460 PE=4 SV=1
A0A087ZNZ6	54.9	7	2	2	41615	Uncharacterized protein OS=Apis mellifera OX=7460 GN=LOC551301 PE=3 SV=1
A0A088AI31	53.94	7	1	1	61534	Uncharacterized protein OS=Apis mellifera OX=7460 GN=LOC408280 PE=4 SV=1
A0A087ZTN5	53.87	7	1	1	17832	Uncharacterized protein OS=Apis mellifera OX=7460 GN=LOC410663 PE=4 SV=1
A0A088AAD0	52.93	7	1	1	29806	Uncharacterized protein OS=Apis mellifera OX=7460 GN=DHRS4 PE=4 SV=1
A0A088AC57	51.23	7	1	1	19016	RNA-binding protein 8A OS=Apis mellifera OX=7460 GN=tsu PE=3 SV=1
A0A088A7Q7	48.82	7	2	2	59191	Uncharacterized protein OS=Apis mellifera OX=7460 GN=PRPF4 PE=4 SV=1
A0A087ZVB1	48.41	7	1	1	21791	Uncharacterized protein OS=Apis mellifera OX=7460 PE=4 SV=1
A0A087ZQ51	48.12	7	1	1	28222	Proteasome assembly chaperone 2 OS=Apis mellifera OX=7460 GN=LOC726900 PE=3 SV=1
A0A088AK34	46.46	7	1	1	24190	Uncharacterized protein OS=Apis mellifera OX=7460 GN=LOC552148 PE=3 SV=1
A0A088AQN0	45.35	7	2	2	52168	Uncharacterized protein OS=Apis mellifera OX=7460 PE=4 SV=1
A0A087ZX28	43.99	7	1	1	23243	Uncharacterized protein OS=Apis mellifera OX=7460 GN=LOC551690 PE=4 SV=1
A0A088AM73	43.99	7	1	1	20956	Uncharacterized protein OS=Apis mellifera OX=7460 GN=LOC409862 PE=4 SV=1
A0A088APU4	40.39	7	1	1	30291	Uncharacterized protein OS=Apis mellifera OX=7460 GN=551215 PE=4 SV=1
A0A087ZT18	39.55	7	1	1	20995	Uncharacterized protein OS=Apis mellifera OX=7460 PE=4 SV=1
A0A088ARU2	38.95	7	1	1	13937	Uncharacterized protein OS=Apis mellifera OX=7460 GN=LOC725315 PE=4 SV=1
A0A088A2P5	38.47	7	1	1	26331	Eukaryotic translation initiation factor 6 OS=Apis mellifera OX=7460 GN=eIF6 PE=3 SV=1
A0A087ZT53	38.15	7	1	1	15247	Uncharacterized protein OS=Apis mellifera OX=7460 PE=4 SV=1
A0A087ZR27	37.44	7	1	1	20251	Uncharacterized protein OS=Apis mellifera OX=7460 PE=3 SV=1
A0A088AML9	37.44	7	1	1	28992	Uncharacterized protein OS=Apis mellifera OX=7460 PE=4 SV=1
A0A088AUR8	37.4	7	1	1	22286	Uncharacterized protein OS=Apis mellifera OX=7460 GN=LOC724852 PE=4 SV=1
A0A088ARA8	36.92	7	1	1	20380	Uncharacterized protein OS=Apis mellifera OX=7460 GN=LOC725055 PE=4 SV=1
A0A088AD81	35.8	7	1	1	13417	Uncharacterized protein OS=Apis mellifera OX=7460 GN=725855 PE=4 SV=1
A0A087ZR72	35.76	7	1	1	25783	Uncharacterized protein OS=Apis mellifera OX=7460 PE=4 SV=1
A0A087ZYK5	35.68	7	1	1	22988	Uncharacterized protein OS=Apis mellifera OX=7460 GN=LOC410376 PE=4 SV=1
A0A087ZRW9	35.46	7	1	1	18538	Uncharacterized protein OS=Apis mellifera OX=7460 GN=LOC409187 PE=4 SV=1
A0A088AKY3	34.29	7	1	1	14681	Uncharacterized protein OS=Apis mellifera OX=7460 PE=4 SV=1
A0A088AD43	32.9	7	1	1	28269	Uncharacterized protein OS=Apis mellifera OX=7460 GN=U2af38 PE=4 SV=1
A0A088A0H5	32.58	7	1	1	13726	Uncharacterized protein OS=Apis mellifera OX=7460 GN=LOC725733 PE=4 SV=1
A0A088AN58	32.46	7	1	1	20319	Uncharacterized protein OS=Apis mellifera OX=7460 PE=4 SV=1
A0A088AAT7	30.36	7	1	1	15708	Uncharacterized protein OS=Apis mellifera OX=7460 PE=4 SV=1
A0A088A399	29.06	7	1	1	23817	Uncharacterized protein OS=Apis mellifera OX=7460 GN=mRpL40 PE=4 SV=1
Q6XPZ7	28.25	7	1	1	27192	Short-chain dehydrogenase/reductase OS=Apis mellifera OX=7460 PE=2 SV=1
A0A088ARX6	28.25	7	1	1	27191	Uncharacterized protein OS=Apis mellifera OX=7460 PE=3 SV=1
A0A088AP98	27.66	7	1	1	19352	Uncharacterized protein OS=Apis mellifera OX=7460 PE=4 SV=1
A0A088AAI2	26.91	7	1	1	22137	Uncharacterized protein OS=Apis mellifera OX=7460 GN=mRpS18B PE=4 SV=1
A0A088A3X2	209.63	8	5	5	132522	Uncharacterized protein OS=Apis mellifera OX=7460 PE=4 SV=1
A0A087ZQS4	207.98	8	18	18	374858	Uncharacterized protein OS=Apis mellifera OX=7460 PE=4 SV=1
A0A088AHI9	202.42	8	13	13	316397	Uncharacterized protein OS=Apis mellifera OX=7460 GN=RANBP2 PE=4 SV=1
A0A088AI45	188.66	8	8	8	148906	Uncharacterized protein OS=Apis mellifera OX=7460 PE=4 SV=1
A0A088AN31	170.46	8	8	8	154809	Uncharacterized protein OS=Apis mellifera OX=7460 PE=4 SV=1
A0A088A6H6	166.5	8	8	8	192051	Uncharacterized protein OS=Apis mellifera OX=7460 GN=LOC414029 PE=4 SV=1
A0A088AQP4	160.39	8	3	1	55336	Uncharacterized protein OS=Apis mellifera OX=7460 PE=4 SV=1
A0A088ASE7	159.65	8	6	6	115493	Uncharacterized protein OS=Apis mellifera OX=7460 PE=4 SV=1
A0A088AS84	155.19	8	10	10	211120	Uncharacterized protein OS=Apis mellifera OX=7460 PE=4 SV=1
A0A088A8Y4	147.29	8	10	10	223096	Uncharacterized protein OS=Apis mellifera OX=7460 GN=msps PE=4 SV=1
A0A088AEX4	137.41	8	5	5	114500	Uncharacterized protein OS=Apis mellifera OX=7460 PE=4 SV=1
A0A087ZS76	137.1	8	4	4	89176	Uncharacterized protein OS=Apis mellifera OX=7460 GN=Nep3 PE=4 SV=1
A0A088A2N7	131.57	8	3	3	84570	Uncharacterized protein OS=Apis mellifera OX=7460 PE=3 SV=1
A0A087ZPA6	129.72	8	5	5	99825	Uncharacterized protein OS=Apis mellifera OX=7460 PE=4 SV=1
A0A088A7J1	123.43	8	3	2	49067	Uncharacterized protein OS=Apis mellifera OX=7460 PE=3 SV=1
A0A087ZRC1	123.07	8	3	3	72598	Angiotensin-converting enzyme OS=Apis mellifera OX=7460 PE=3 SV=1
A0A087ZY17	121.55	8	4	4	105701	Uncharacterized protein OS=Apis mellifera OX=7460 GN=LOC413977 PE=4 SV=1
A0A088A152	117.7	8	3	3	65986	Uncharacterized protein OS=Apis mellifera OX=7460 GN=Elf PE=4 SV=1
W8VTH9	110.99	8	3	3	67898	Tyramine beta-hydroxylase OS=Apis mellifera OX=7460 GN=AmTbH PE=2 SV=1
Q147S1	110.99	8	3	3	70097	Tyramine beta hydroxylase OS=Apis mellifera OX=7460 GN=TBh PE=2 SV=1
A0A088ALI5	110.97	8	6	6	166780	Uncharacterized protein OS=Apis mellifera OX=7460 PE=4 SV=1
A0A088A4D7	110.65	8	2	1	43562	Uncharacterized protein OS=Apis mellifera OX=7460 GN=LOC410906 PE=4 SV=1
A0A088AKJ5	109.92	8	7	7	178112	Uncharacterized protein OS=Apis mellifera OX=7460 PE=4 SV=1
Q25BT8	109.4	8	4	4	67357	Alpha-glucosidase OS=Apis mellifera OX=7460 GN=hbg1 PE=4 SV=1
A0A088AR84	106.17	8	3	3	66258	Signal recognition particle subunit SRP68 OS=Apis mellifera OX=7460 GN=Srp68 PE=3 SV=1
A0A088AUV5	106.02	8	4	4	68674	Uncharacterized protein OS=Apis mellifera OX=7460 GN=LOC410806 PE=3 SV=1
A0A088AER0	102.86	8	2	2	49385	Uncharacterized protein OS=Apis mellifera OX=7460 PE=4 SV=1
A0A087ZY55	102.57	8	3	3	54530	Uncharacterized protein OS=Apis mellifera OX=7460 GN=LOC409065 PE=4 SV=1
X2JFT9	102.48	8	1	1	23583	Ribosomal protein L19 OS=Apis mellifera OX=7460 GN=rpl19 PE=2 SV=1
A0A087ZT75	102.47	8	4	4	82994	Uncharacterized protein OS=Apis mellifera OX=7460 GN=LOC552574 PE=4 SV=1
A0A087ZZR2	101.62	8	2	2	58901	Uncharacterized protein OS=Apis mellifera OX=7460 GN=LOC412707 PE=4 SV=1
A0A087ZR82	100.43	8	1	1	18597	Uncharacterized protein OS=Apis mellifera OX=7460 GN=LOC411664 PE=4 SV=1
A0A088AA31	99.54	8	1	1	25888	Uncharacterized protein OS=Apis mellifera OX=7460 GN=LOC552707 PE=4 SV=1
A0A088AHC6	99.46	8	2	1	47486	Uncharacterized protein OS=Apis mellifera OX=7460 PE=4 SV=1
A0A088AC55	97.82	8	2	2	32696	Uncharacterized protein OS=Apis mellifera OX=7460 PE=4 SV=1
A0A087ZPB7	97.38	8	1	1	22472	Uncharacterized protein OS=Apis mellifera OX=7460 GN=LOC412864 PE=4 SV=1
A0A088A0F8	96.44	8	4	4	88004	Uncharacterized protein OS=Apis mellifera OX=7460 GN=Cat PE=4 SV=1
A0A088AUS5	95.49	8	5	5	80632	Oxysterol-binding protein OS=Apis mellifera OX=7460 PE=3 SV=1
A0A087ZP47	94.35	8	1	1	21717	Uncharacterized protein OS=Apis mellifera OX=7460 GN=LOC410017 PE=4 SV=1
A0A088ASD0	93.38	8	2	2	45320	Uncharacterized protein OS=Apis mellifera OX=7460 GN=LOC551980 PE=4 SV=1
A0A088AL08	91.44	8	3	3	58704	Uncharacterized protein OS=Apis mellifera OX=7460 PE=4 SV=1
A0A087ZQ42	90.66	8	2	2	42404	Uncharacterized protein OS=Apis mellifera OX=7460 GN=TfIIA-L PE=4 SV=1
A0A088ABD2	89.62	8	2	2	48728	Uncharacterized protein OS=Apis mellifera OX=7460 PE=4 SV=1
A0A087ZRN6	89.47	8	4	4	84989	Uncharacterized protein OS=Apis mellifera OX=7460 GN=LOC411167 PE=3 SV=1
A0A087ZQJ3	89.11	8	3	3	79268	Protein tweety homolog OS=Apis mellifera OX=7460 PE=3 SV=1
A0A088A6S1	86.34	8	2	2	34899	Serine/threonine-protein phosphatase OS=Apis mellifera OX=7460 GN=PpV PE=3 SV=1
A0A088ACR5	82.77	8	3	3	39963	Uncharacterized protein OS=Apis mellifera OX=7460 PE=4 SV=1
A0A087ZYD6	79.8	8	2	2	44485	Mitogen-activated protein kinase OS=Apis mellifera OX=7460 PE=4 SV=1
A0A088AR65	78.93	8	1	1	28063	Cytosolic Fe-S cluster assembly factor NUBP2 homolog OS=Apis mellifera OX=7460 GN=LOC410516 PE=3 SV=1
A0A087ZN44	78.92	8	3	3	46811	Carboxypeptidase OS=Apis mellifera OX=7460 PE=3 SV=1
A0A087ZUK2	78.79	8	2	2	34132	Uncharacterized protein OS=Apis mellifera OX=7460 GN=LOC413065 PE=4 SV=1
A0A088ANN1	76.27	8	2	2	25802	Uncharacterized protein OS=Apis mellifera OX=7460 GN=LOC408621 PE=4 SV=1
A0A088A4N4	73.87	8	3	3	62264	Uncharacterized protein OS=Apis mellifera OX=7460 GN=LOC413831 PE=4 SV=1
A0A088A003	72.14	8	2	2	14746	40S ribosomal protein S30 OS=Apis mellifera OX=7460 GN=RpS30 PE=3 SV=1
A0A087ZX21	70.22	8	2	2	46524	Uncharacterized protein OS=Apis mellifera OX=7460 GN=Spred PE=4 SV=1
A0A088AFC7	70.13	8	2	2	50881	Serine/threonine-protein phosphatase 2A 55 kDa regulatory subunit B OS=Apis mellifera OX=7460 GN=tws PE=3 SV=1
A0A087ZVF7	69.78	8	3	3	62994	Uncharacterized protein OS=Apis mellifera OX=7460 PE=4 SV=1
A0A088A0Z3	66.4	8	2	2	42951	Uncharacterized protein OS=Apis mellifera OX=7460 GN=Arp11 PE=3 SV=1
A0A088A935	66.03	8	2	2	53695	Uncharacterized protein OS=Apis mellifera OX=7460 PE=4 SV=1
A0A088A8B0	64.74	8	2	2	39511	LIM domain-containing protein OS=Apis mellifera OX=7460 GN=LOC551547 PE=4 SV=1
A0A088AV36	64.02	8	1	1	17121	Uncharacterized protein OS=Apis mellifera OX=7460 GN=GST-mic1 PE=4 SV=1
A0A088AVY2	63.19	8	2	2	49633	Uncharacterized protein OS=Apis mellifera OX=7460 GN=Cbs PE=4 SV=1
I2CJJ5	62.86	8	2	2	26531	Thioredoxin peroxidise 1 (Fragment) OS=Apis mellifera OX=7460 GN=GB12946 PE=4 SV=1
I2CJL9	62.86	8	2	2	26513	Thioredoxin peroxidise 1 (Fragment) OS=Apis mellifera OX=7460 GN=GB12946 PE=4 SV=1
A0A088A4P1	62.63	8	2	2	61804	Uncharacterized protein OS=Apis mellifera OX=7460 GN=Bx42 PE=4 SV=1
A0A088AIT0	62.45	8	2	2	39320	Uncharacterized protein OS=Apis mellifera OX=7460 PE=4 SV=1
A0A088AAB4	60.41	8	1	1	19490	Uncharacterized protein OS=Apis mellifera OX=7460 GN=LOC724486 PE=4 SV=1
O97432	59.42	8	3	2	70236	Major royal jelly protein 5 OS=Apis mellifera OX=7460 GN=MRJP5 PE=2 SV=1
D3JZ08	59.42	8	3	2	70182	MRJP5 OS=Apis mellifera OX=7460 PE=2 SV=1
A0A088AIR4	59.38	8	2	2	39424	Uncharacterized protein OS=Apis mellifera OX=7460 GN=LOC409169 PE=4 SV=1
A0A087ZR59	58.24	8	2	2	58569	Uncharacterized protein OS=Apis mellifera OX=7460 GN=LOC413805 PE=4 SV=1
A0A087ZWI6	57.33	8	2	2	36138	Uncharacterized protein OS=Apis mellifera OX=7460 GN=LOC408327 PE=4 SV=1
A0A088A2F5	57.06	8	2	2	52390	Uncharacterized protein OS=Apis mellifera OX=7460 GN=100578161 PE=4 SV=1
A0A088AQK0	54.8	8	1	1	19130	Uncharacterized protein OS=Apis mellifera OX=7460 PE=4 SV=1
A0A088AJ29	54.76	8	1	1	29822	Uncharacterized protein OS=Apis mellifera OX=7460 GN=LOC551633 PE=4 SV=1
A0A088AFV4	54.13	8	1	1	32823	Uncharacterized protein OS=Apis mellifera OX=7460 GN=mRpL28 PE=4 SV=1
A0A087ZQT4	53.66	8	2	2	37476	Uncharacterized protein OS=Apis mellifera OX=7460 GN=100576663 PE=4 SV=1
A0A088APV9	52.42	8	1	1	19485	Uncharacterized protein OS=Apis mellifera OX=7460 GN=LOC413997 PE=4 SV=1
A0A087ZY37	51.98	8	1	1	27376	Uncharacterized protein OS=Apis mellifera OX=7460 GN=100577876 PE=4 SV=1
A0A088AA09	46.61	8	1	1	22937	Uncharacterized protein OS=Apis mellifera OX=7460 GN=LOC410415 PE=4 SV=1
Q10416	46.12	8	1	1	14492	Hymenoptaecin OS=Apis mellifera OX=7460 PE=2 SV=1
A0A088A6Q2	45.98	8	1	1	26768	Uncharacterized protein OS=Apis mellifera OX=7460 GN=LOC410079 PE=4 SV=1
A0A088AJK7	44.91	8	1	1	29686	Tetraspanin OS=Apis mellifera OX=7460 GN=Tspan8 PE=3 SV=1
A0A088A204	43.39	8	1	1	29580	Uncharacterized protein OS=Apis mellifera OX=7460 GN=mRpS2 PE=3 SV=1
A0A088ASM9	42.91	8	1	1	14948	Uncharacterized protein OS=Apis mellifera OX=7460 PE=4 SV=1
A0A088A6H9	42.75	8	1	1	29187	Uncharacterized protein OS=Apis mellifera OX=7460 GN=LOC552601 PE=4 SV=1
A0A088ALI8	41.26	8	1	1	26924	Uncharacterized protein OS=Apis mellifera OX=7460 PE=4 SV=1
A0A087ZR22	35.31	8	1	1	27014	Uncharacterized protein OS=Apis mellifera OX=7460 GN=LOC410915 PE=3 SV=1
A0A087ZS23	35.17	8	1	1	51103	Uncharacterized protein OS=Apis mellifera OX=7460 GN=ced-6 PE=4 SV=1
A0A087ZV23	34.09	8	1	1	21395	Uncharacterized protein OS=Apis mellifera OX=7460 GN=LOC409600 PE=4 SV=1
A0A088AUK2	34.02	8	1	1	24812	Uncharacterized protein OS=Apis mellifera OX=7460 GN=Vamp7 PE=3 SV=1
A0A088A2S6	33.74	8	1	1	26023	Uncharacterized protein OS=Apis mellifera OX=7460 GN=LOC724666 PE=4 SV=1
A0A0B4J2N9	33.63	8	1	1	28929	Uncharacterized protein OS=Apis mellifera OX=7460 GN=Bcas2 PE=4 SV=1
A0A088AFC0	32.99	8	1	1	25641	Uncharacterized protein OS=Apis mellifera OX=7460 GN=mRpS26 PE=4 SV=1
A0A088AFN4	32.2	8	1	1	15919	Uncharacterized protein OS=Apis mellifera OX=7460 GN=LOC552237 PE=4 SV=1
A0A088ABN8	31.99	8	1	1	10840	Uncharacterized protein OS=Apis mellifera OX=7460 PE=4 SV=1
A0A088AG11	30.3	8	1	1	13298	AP complex subunit sigma OS=Apis mellifera OX=7460 PE=3 SV=1
A0A088AJB4	29.24	8	1	1	17701	Uncharacterized protein OS=Apis mellifera OX=7460 GN=mRpS6 PE=4 SV=1
A0A088ASZ5	28.61	8	1	1	14727	Uncharacterized protein OS=Apis mellifera OX=7460 GN=LOC552560 PE=4 SV=1
Q38RA4	27.27	8	1	1	16947	Lipophorin receptor (Fragment) OS=Apis mellifera OX=7460 PE=2 SV=1
A0A088A3X0	242.27	9	11	11	190969	Uncharacterized protein OS=Apis mellifera OX=7460 GN=LOC408552 PE=4 SV=1
A0A087ZWP8	200.36	9	3	3	73726	Uncharacterized protein OS=Apis mellifera OX=7460 PE=3 SV=1
A0A088AUA9	194.71	9	4	4	57610	Uncharacterized protein OS=Apis mellifera OX=7460 PE=3 SV=1
A0A087ZZ67	191.74	9	7	7	140134	Uncharacterized protein OS=Apis mellifera OX=7460 GN=LOC725169 PE=4 SV=1
A0A087ZSF4	186.86	9	8	8	144969	Uncharacterized protein OS=Apis mellifera OX=7460 GN=chb PE=4 SV=1
A0A088AN52	171.57	9	4	4	75659	Lipase maturation factor OS=Apis mellifera OX=7460 GN=LOC724741 PE=3 SV=1
A0A088AEL1	166.43	9	8	8	160969	Uncharacterized protein OS=Apis mellifera OX=7460 GN=LOC724962 PE=4 SV=1
A0A087ZNK6	165.58	9	6	6	129987	Uncharacterized protein OS=Apis mellifera OX=7460 PE=4 SV=1
A0A088A015	164.81	9	6	6	100380	Uncharacterized protein OS=Apis mellifera OX=7460 GN=LOC408851 PE=3 SV=1
A0A088AKD7	164.02	9	5	5	88556	Uncharacterized protein OS=Apis mellifera OX=7460 GN=Nep2 PE=4 SV=1
A0A087ZUE1	163.9	9	5	5	76960	Uncharacterized protein OS=Apis mellifera OX=7460 PE=4 SV=1
A0A088A2E0	162.01	9	5	5	119249	Uncharacterized protein OS=Apis mellifera OX=7460 GN=GARNL3 PE=4 SV=1
A0A0B4J2L8	158.98	9	12	12	278873	Serine/threonine-protein kinase TOR OS=Apis mellifera OX=7460 GN=Tor PE=3 SV=1
A0A088A2C4	157.59	9	6	6	114107	Uncharacterized protein OS=Apis mellifera OX=7460 PE=4 SV=1
A0A088ANA5	152.14	9	4	4	75344	Uncharacterized protein OS=Apis mellifera OX=7460 PE=4 SV=1
A0A088A9Q7	142.23	9	6	6	147500	Ubiquitin carboxyl-terminal hydrolase OS=Apis mellifera OX=7460 GN=LOC408911 PE=3 SV=1
A0A088ABA4	135.74	9	4	4	88228	Uncharacterized protein OS=Apis mellifera OX=7460 GN=LOC412505 PE=4 SV=1
A0A087ZYV0	135.61	9	7	7	152628	Uncharacterized protein OS=Apis mellifera OX=7460 PE=4 SV=1
A0A088AGL0	135.45	9	2	2	51860	Uncharacterized protein OS=Apis mellifera OX=7460 PE=3 SV=1
A0A088AV10	131.22	9	3	3	57180	Uncharacterized protein OS=Apis mellifera OX=7460 GN=LOC726589 PE=4 SV=1
A0A088A560	131.17	9	8	8	129903	Eukaryotic translation initiation factor 3 subunit A OS=Apis mellifera OX=7460 GN=eIF3-S10 PE=3 SV=1
A0A087ZZ41	130.71	9	4	4	67391	Uncharacterized protein OS=Apis mellifera OX=7460 GN=Sac1 PE=4 SV=1
A0A088AJI0	128.96	9	6	6	128875	Uncharacterized protein OS=Apis mellifera OX=7460 PE=4 SV=1
A0A088AQ07	119.61	9	6	6	117189	Uncharacterized protein OS=Apis mellifera OX=7460 GN=LOC551375 PE=4 SV=1
A0A088ARD5	117.04	9	3	3	81860	Uncharacterized protein OS=Apis mellifera OX=7460 GN=LOC727486 PE=4 SV=1
A0A088AKE0	116.77	9	1	1	31834	Eukaryotic translation initiation factor 3 subunit G OS=Apis mellifera OX=7460 GN=LOC408386 PE=3 SV=1
A0A088AUK1	116.33	9	2	2	40524	Uncharacterized protein OS=Apis mellifera OX=7460 PE=4 SV=1
A0A088AL95	113.62	9	2	2	41780	Uncharacterized protein OS=Apis mellifera OX=7460 PE=4 SV=1
A0A088AES6	113.33	9	3	3	55029	Uncharacterized protein OS=Apis mellifera OX=7460 PE=4 SV=1
A0A088A2I0	112.7	9	3	3	51797	Uncharacterized protein OS=Apis mellifera OX=7460 PE=4 SV=1
A0A088A118	107.92	9	4	4	71639	Uncharacterized protein OS=Apis mellifera OX=7460 GN=PPP4R2r PE=4 SV=1
A0A088A1D1	107.08	9	5	5	103214	Uncharacterized protein OS=Apis mellifera OX=7460 PE=3 SV=1
A0A088ABP0	105.3	9	2	2	52846	Uncharacterized protein OS=Apis mellifera OX=7460 PE=4 SV=1
A0A088A534	99.58	9	2	2	33964	Uncharacterized protein OS=Apis mellifera OX=7460 GN=Syx17 PE=4 SV=1
A0A088A0J4	99.2	9	3	3	43276	Diphosphomevalonate decarboxylase OS=Apis mellifera OX=7460 GN=LOC725817 PE=3 SV=1
A0A088AJH7	99.1	9	2	2	36153	Uncharacterized protein OS=Apis mellifera OX=7460 PE=4 SV=1
A0A087ZSV2	98.16	9	4	4	63126	Uncharacterized protein OS=Apis mellifera OX=7460 PE=4 SV=1
A0A088AEK7	95.48	9	4	4	59058	Uncharacterized protein OS=Apis mellifera OX=7460 GN=CYP6AS7 PE=3 SV=1
A0A087ZYD9	94.1	9	5	5	100139	Uncharacterized protein OS=Apis mellifera OX=7460 PE=4 SV=1
Q3B710	93.82	9	2	2	44966	Troponin H isoform 2 OS=Apis mellifera OX=7460 GN=TpnH PE=4 SV=1
A0A088AUR4	93.36	9	2	2	22449	Uncharacterized protein OS=Apis mellifera OX=7460 GN=Drep-1 PE=4 SV=1
A0A088A6W4	93.33	9	2	2	32444	Uncharacterized protein OS=Apis mellifera OX=7460 PE=4 SV=1
A0A088AU21	92.5	9	2	2	49879	Uncharacterized protein OS=Apis mellifera OX=7460 PE=4 SV=1
Q6W3E3	92.5	9	2	2	49786	Major royal jelly protein MRJP6 OS=Apis mellifera OX=7460 PE=2 SV=1
A0A088ACC6	89.8	9	3	3	70814	Uncharacterized protein OS=Apis mellifera OX=7460 PE=4 SV=1
A0A088A7K9	89.05	9	2	2	43943	Uncharacterized protein OS=Apis mellifera OX=7460 PE=3 SV=1
A0A087ZNI5	89.03	9	2	2	38416	ATP-dependent (S)-NAD(P)H-hydrate dehydratase OS=Apis mellifera OX=7460 PE=3 SV=1
A0A088A788	86.13	9	3	3	84971	Integrin beta OS=Apis mellifera OX=7460 PE=3 SV=1
A0A088AQL5	85.92	9	2	2	36638	Uncharacterized protein OS=Apis mellifera OX=7460 GN=Bub3 PE=4 SV=1
A0A088AUM9	85.8	9	2	2	27010	Uncharacterized protein OS=Apis mellifera OX=7460 GN=100577661 PE=4 SV=1
A0A088A8A7	83.7	9	2	2	24577	40S ribosomal protein S7 OS=Apis mellifera OX=7460 GN=RpS7 PE=3 SV=1
A0A088AER4	83.03	9	3	3	64701	Uncharacterized protein OS=Apis mellifera OX=7460 GN=LOC727031 PE=3 SV=1
A0A087ZV42	80.89	9	5	5	74016	Uncharacterized protein OS=Apis mellifera OX=7460 PE=3 SV=1
A0A088A0F6	78.13	9	3	3	80791	Uncharacterized protein OS=Apis mellifera OX=7460 GN=LOC726336 PE=4 SV=1
A0A088AEV2	77.62	9	1	1	17361	Uncharacterized protein OS=Apis mellifera OX=7460 GN=RpL26 PE=4 SV=1
A0A088A051	76.57	9	2	2	33290	Uncharacterized protein OS=Apis mellifera OX=7460 GN=LOC413711 PE=3 SV=1
A0A088ABM1	76.31	9	2	2	38646	Uncharacterized protein OS=Apis mellifera OX=7460 PE=3 SV=1
A0A088A008	76.13	9	2	2	57653	Uncharacterized protein OS=Apis mellifera OX=7460 PE=4 SV=1
A0A088ALN8	75.26	9	1	1	16283	Uncharacterized protein OS=Apis mellifera OX=7460 GN=LOC413845 PE=3 SV=1
A0A088AMD5	73.71	9	1	1	19243	Uncharacterized protein OS=Apis mellifera OX=7460 GN=SdhC PE=4 SV=1
A0A087ZWB6	73.61	9	3	3	52296	Uncharacterized protein OS=Apis mellifera OX=7460 PE=4 SV=1
A0A088A7L7	72.66	9	3	3	48766	Uncharacterized protein OS=Apis mellifera OX=7460 PE=4 SV=1
A0A0H3V2Z7	72.66	9	3	3	50004	Disulfide-isomerase TMX3-like protein OS=Apis mellifera OX=7460 GN=LOC726237 PE=2 SV=1
A0A088A4U8	71.04	9	1	1	19707	Uncharacterized protein OS=Apis mellifera OX=7460 PE=4 SV=1
A0A088A4L3	69.74	9	1	1	16441	OBP18 OS=Apis mellifera OX=7460 PE=4 SV=1
A0A088ADD4	68.87	9	2	2	34402	Uncharacterized protein OS=Apis mellifera OX=7460 PE=4 SV=1
A0A088AUC3	67.53	9	2	2	46604	Uncharacterized protein OS=Apis mellifera OX=7460 GN=LOC410702 PE=4 SV=1
A0A088AGR3	66.93	9	4	4	83720	Uncharacterized protein OS=Apis mellifera OX=7460 PE=4 SV=1
A0A088AWA1	65.05	9	2	2	46061	Uncharacterized protein OS=Apis mellifera OX=7460 GN=LOC724498 PE=4 SV=1
A0A087ZRE7	64.91	9	1	1	21003	H/ACA ribonucleoprotein complex subunit OS=Apis mellifera OX=7460 GN=LOC413686 PE=3 SV=1
A0A087ZRH2	64.07	9	2	2	31172	Glycerol-3-phosphate dehydrogenase [NAD(+)] OS=Apis mellifera OX=7460 PE=3 SV=1
A0A088ANE4	63.46	9	3	3	49320	Uncharacterized protein OS=Apis mellifera OX=7460 GN=727071 PE=4 SV=1
A0A088AT08	63.4	9	1	1	26070	Uncharacterized protein OS=Apis mellifera OX=7460 GN=LOC408614 PE=4 SV=1
A0A088A8P1	62.75	9	1	1	24097	Uncharacterized protein OS=Apis mellifera OX=7460 GN=100577325 PE=4 SV=1
A0A087ZWX8	62.42	9	1	1	18328	Uncharacterized protein OS=Apis mellifera OX=7460 GN=LOC727300 PE=4 SV=1
A0A088AHT1	59.26	9	3	3	59280	Uncharacterized protein OS=Apis mellifera OX=7460 GN=LOC410208 PE=4 SV=1
A0A087ZP77	58.89	9	1	1	26834	Uncharacterized protein OS=Apis mellifera OX=7460 PE=4 SV=1
A0A088ANS0	58.72	9	2	2	38810	Nicotinamide-nucleotide adenylyltransferase OS=Apis mellifera OX=7460 PE=3 SV=1
A0A088A6F0	58.65	9	2	2	28898	Uncharacterized protein OS=Apis mellifera OX=7460 GN=CCS PE=4 SV=1
A0A088AVC9	56.53	9	1	1	26581	Uncharacterized protein OS=Apis mellifera OX=7460 GN=LOC413613 PE=4 SV=1
A0A088ASM8	55.93	9	1	1	22110	Uncharacterized protein OS=Apis mellifera OX=7460 GN=mRpL35 PE=4 SV=1
A0A088A289	55.48	9	1	1	19124	Nuclear cap-binding protein subunit 2 OS=Apis mellifera OX=7460 GN=LOC413877 PE=3 SV=1
G5D4Z3	55.12	9	2	2	33021	Nischarin-like protein (Fragment) OS=Apis mellifera OX=7460 PE=4 SV=1
G5D4X4	55.12	9	2	2	33039	Nischarin-like protein (Fragment) OS=Apis mellifera OX=7460 PE=4 SV=1
G5D4X6	55.12	9	2	2	33035	Nischarin-like protein (Fragment) OS=Apis mellifera OX=7460 PE=4 SV=1
I2CM12	55.12	9	2	2	33154	Nischarin-like protein (Fragment) OS=Apis mellifera OX=7460 GN=GB20077 PE=4 SV=1
I2CM23	55.12	9	2	2	33152	Nischarin-like protein (Fragment) OS=Apis mellifera OX=7460 GN=GB20077 PE=4 SV=1
G5D4Y5	55.12	9	2	2	33126	Nischarin-like protein (Fragment) OS=Apis mellifera OX=7460 PE=4 SV=1
I2CM31	55.12	9	2	2	33152	Nischarin-like protein (Fragment) OS=Apis mellifera OX=7460 GN=GB20077 PE=4 SV=1
G5D4W3	55.12	9	2	2	33168	Nischarin-like protein (Fragment) OS=Apis mellifera OX=7460 PE=4 SV=1
G5D4Y6	55.12	9	2	2	33140	Nischarin-like protein (Fragment) OS=Apis mellifera OX=7460 PE=4 SV=1
I2CLZ8	55.12	9	2	2	33134	Nischarin-like protein (Fragment) OS=Apis mellifera OX=7460 GN=GB20077 PE=4 SV=1
G5D4Y4	55.12	9	2	2	33269	Nischarin-like protein (Fragment) OS=Apis mellifera OX=7460 PE=4 SV=1
G5D4Y3	55.12	9	2	2	33255	Nischarin-like protein (Fragment) OS=Apis mellifera OX=7460 PE=4 SV=1
G5D4Z1	55.12	9	2	2	33368	Nischarin-like protein (Fragment) OS=Apis mellifera OX=7460 PE=4 SV=1
G5D4Z2	55.12	9	2	2	33382	Nischarin-like protein (Fragment) OS=Apis mellifera OX=7460 PE=4 SV=1
A0A088ASM7	54.55	9	1	1	13602	Uncharacterized protein OS=Apis mellifera OX=7460 GN=LOC408547 PE=4 SV=1
A0A088A3W0	52.83	9	1	1	22304	Succinate dehydrogenase [ubiquinone] cytochrome b small subunit OS=Apis mellifera OX=7460 GN=LOC725566 PE=3 SV=1
A0A088A6G3	50	9	1	1	23889	Uncharacterized protein OS=Apis mellifera OX=7460 GN=LOC412160 PE=4 SV=1
A0A087ZZ23	49.01	9	2	2	32706	Uncharacterized protein OS=Apis mellifera OX=7460 GN=mRpL4 PE=4 SV=1
A0A088AN38	47.96	9	1	1	23850	Uncharacterized protein OS=Apis mellifera OX=7460 GN=LOC408773 PE=4 SV=1
C7AHW1	46.12	9	1	1	12611	Hymenoptaecin (Fragment) OS=Apis mellifera OX=7460 PE=2 SV=1
A0A088A893	41.73	9	1	1	17996	Uncharacterized protein OS=Apis mellifera OX=7460 PE=4 SV=1
A0A087ZTN8	40.11	9	1	1	33327	Uncharacterized protein OS=Apis mellifera OX=7460 GN=LOC410665 PE=4 SV=1
A0A088AHV6	39.15	9	1	1	18839	Uncharacterized protein OS=Apis mellifera OX=7460 PE=4 SV=1
A0A088ADW1	38.69	9	1	1	25470	Uncharacterized protein OS=Apis mellifera OX=7460 GN=LOC552583 PE=4 SV=1
A0A088AQN3	38.04	9	1	1	15496	U6 snRNA-associated Sm-like protein LSm1 OS=Apis mellifera OX=7460 GN=LOC552260 PE=3 SV=1
A0A088APQ8	37.95	9	1	1	23015	PRA1 family protein OS=Apis mellifera OX=7460 GN=107965354 PE=3 SV=1
A0A088A827	37.94	9	1	1	17551	Protein quiver OS=Apis mellifera OX=7460 PE=3 SV=1
A0A088A6E4	36.39	9	1	1	15405	Uncharacterized protein OS=Apis mellifera OX=7460 PE=4 SV=1
A0A088AW22	36.02	9	1	1	20326	Uncharacterized protein OS=Apis mellifera OX=7460 GN=LOC725904 PE=4 SV=1
A0A088A5F9	34.12	9	1	1	37025	Uncharacterized protein OS=Apis mellifera OX=7460 PE=4 SV=1
A0A088AR29	33.4	9	1	1	24283	Uncharacterized protein OS=Apis mellifera OX=7460 GN=LOC552492 PE=3 SV=1
A0A088ANF2	32.8	9	1	1	53936	Uncharacterized protein OS=Apis mellifera OX=7460 GN=LOC409774 PE=4 SV=1
A0A087ZVV3	31.97	9	1	1	16591	Uncharacterized protein OS=Apis mellifera OX=7460 GN=LOC725961 PE=4 SV=1
A0A088A0Q0	30.72	9	1	1	17897	Uncharacterized protein OS=Apis mellifera OX=7460 GN=LOC551354 PE=4 SV=1
A0A088ACY6	29.27	9	1	1	22590	Uncharacterized protein OS=Apis mellifera OX=7460 GN=jagn PE=4 SV=1
A0A088ACK1	29	9	1	1	11199	Small ubiquitin-related modifier OS=Apis mellifera OX=7460 GN=LOC409308 PE=3 SV=1
A0A087ZW75	263.23	10	9	9	156552	Uncharacterized protein OS=Apis mellifera OX=7460 PE=4 SV=1
A0A088ARB4	215.08	10	10	10	147786	Uncharacterized protein OS=Apis mellifera OX=7460 PE=4 SV=1
A0A088AUF4	206.28	10	7	7	135522	Uncharacterized protein OS=Apis mellifera OX=7460 PE=4 SV=1
A0A088AHX5	205.81	10	8	8	131454	Uncharacterized protein OS=Apis mellifera OX=7460 PE=4 SV=1
A0A087ZS62	194.29	10	12	12	228585	Uncharacterized protein OS=Apis mellifera OX=7460 PE=4 SV=1
A0A088AQ38	173.14	10	4	4	74593	Uncharacterized protein OS=Apis mellifera OX=7460 GN=LOC726158 PE=4 SV=1
A0A088AQI7	171.91	10	11	11	238900	Uncharacterized protein OS=Apis mellifera OX=7460 PE=4 SV=1
A0A087ZQV8	166.63	10	4	4	84767	Uncharacterized protein OS=Apis mellifera OX=7460 GN=LOC409565 PE=4 SV=1
A0A087ZN37	161.04	10	9	9	177848	Uncharacterized protein OS=Apis mellifera OX=7460 GN=408429 PE=4 SV=1
A0A088A2N6	154.84	10	5	5	96521	E3 ubiquitin-protein ligase OS=Apis mellifera OX=7460 GN=Nedd4 PE=4 SV=1
A0A088AFI6	152.53	10	2	2	34983	Uncharacterized protein OS=Apis mellifera OX=7460 GN=LOC726616 PE=4 SV=1
A0A088AS59	152.18	10	5	4	82251	Uncharacterized protein OS=Apis mellifera OX=7460 GN=LOC411250 PE=3 SV=1
A0A088A179	149.92	10	6	6	105172	Uncharacterized protein OS=Apis mellifera OX=7460 PE=4 SV=1
A0A087ZZR8	149.34	10	9	9	126217	Uncharacterized protein OS=Apis mellifera OX=7460 PE=4 SV=1
A0A087ZSB8	148.48	10	6	6	98507	Uncharacterized protein OS=Apis mellifera OX=7460 GN=LOC727232 PE=4 SV=1
A0A088A702	146.2	10	4	4	73335	Uncharacterized protein OS=Apis mellifera OX=7460 PE=4 SV=1
A0A087ZW77	141.49	10	2	2	52715	Uncharacterized protein OS=Apis mellifera OX=7460 GN=LOC552459 PE=4 SV=1
A0A087ZZW7	136.16	10	2	2	35010	Uncharacterized protein OS=Apis mellifera OX=7460 GN=LOC724743 PE=4 SV=1
A0A088AHR1	128.34	10	2	2	29848	Uncharacterized protein OS=Apis mellifera OX=7460 PE=4 SV=1
Q5UAF0	127.42	10	4	4	68305	Soluble guanylyl cyclase beta 1 subunit OS=Apis mellifera OX=7460 GN=Gycbeta1 PE=2 SV=1
Q6L5L6	127.42	10	4	4	68273	Soluble guanylyl cyclase beta 1 subunit OS=Apis mellifera OX=7460 GN=AmsGC beta-1 PE=2 SV=1
A0A088A8A2	122.72	10	5	5	98353	Uncharacterized protein OS=Apis mellifera OX=7460 PE=4 SV=1
A0A087ZRK6	122.67	10	4	4	66620	Uncharacterized protein OS=Apis mellifera OX=7460 PE=4 SV=1
A0A088AUI8	115.46	10	2	2	34059	Uncharacterized protein OS=Apis mellifera OX=7460 PE=4 SV=1
A0A088A1L3	114.87	10	3	3	49211	Uncharacterized protein OS=Apis mellifera OX=7460 GN=LOC408349 PE=3 SV=1
A0A088AEX7	113.85	10	5	5	92809	Signal transducer and activator of transcription OS=Apis mellifera OX=7460 GN=STAT92E-like PE=3 SV=1
A0A087ZTJ1	112.67	10	3	3	85758	Uncharacterized protein OS=Apis mellifera OX=7460 GN=LOC408565 PE=4 SV=1
A0A087ZPW3	112.27	10	3	3	49793	Uncharacterized protein OS=Apis mellifera OX=7460 GN=Syt4 PE=4 SV=1
A0A088ARU1	107.11	10	3	3	27358	Uncharacterized protein OS=Apis mellifera OX=7460 GN=LOC552675 PE=4 SV=1
A0A088A8N3	106.63	10	2	2	32430	Uncharacterized protein OS=Apis mellifera OX=7460 GN=724679 PE=4 SV=1
A0A088AEJ8	102.31	10	3	3	53722	Uncharacterized protein OS=Apis mellifera OX=7460 GN=LOC412935 PE=4 SV=1
A0A088AFE4	101.42	10	3	3	40301	Uncharacterized protein OS=Apis mellifera OX=7460 GN=Csnk1a1 PE=3 SV=1
A0A088AN97	101.33	10	3	3	42970	Uncharacterized protein OS=Apis mellifera OX=7460 GN=LOC411533 PE=4 SV=1
A0A087ZTJ6	100.58	10	4	4	64863	Uncharacterized protein OS=Apis mellifera OX=7460 PE=4 SV=1
A0A088AN03	100.25	10	4	4	67578	Uncharacterized protein OS=Apis mellifera OX=7460 GN=LOC551101 PE=4 SV=1
A0A088ACF3	97.28	10	2	2	37022	Delta-aminolevulinic acid dehydratase OS=Apis mellifera OX=7460 GN=Pbgs PE=3 SV=1
A0A088A0S0	97.03	10	2	2	27981	Uncharacterized protein OS=Apis mellifera OX=7460 GN=GstO1 PE=3 SV=1
A0A087ZZZ5	95.77	10	3	3	65260	Uncharacterized protein OS=Apis mellifera OX=7460 GN=LOC413935 PE=4 SV=1
A0A088AW09	87.49	10	4	4	85198	Uncharacterized protein OS=Apis mellifera OX=7460 PE=3 SV=1
A0A088A9Y6	87.46	10	1	1	20432	Uncharacterized protein OS=Apis mellifera OX=7460 GN=100579055 PE=4 SV=1
A0A088A9V3	84.87	10	4	4	65402	Uncharacterized protein OS=Apis mellifera OX=7460 GN=LOC408910 PE=4 SV=1
A0A088AT64	84.79	10	2	2	55970	Uncharacterized protein OS=Apis mellifera OX=7460 PE=4 SV=1
A0A087ZXD3	82.4	10	2	2	36884	Uncharacterized protein OS=Apis mellifera OX=7460 GN=LOC410487 PE=4 SV=1
A0A088A5C5	80	10	1	1	15265	Uncharacterized protein OS=Apis mellifera OX=7460 GN=LOC724680 PE=4 SV=1
A0A087ZR38	78.75	10	2	2	42628	Uncharacterized protein OS=Apis mellifera OX=7460 GN=Trp1 PE=4 SV=1
H9K170	78.72	10	1	1	15932	60S ribosomal protein L32 OS=Apis mellifera OX=7460 GN=RpL32 PE=4 SV=1
A0A088AFE8	76.84	10	3	3	58356	Uncharacterized protein OS=Apis mellifera OX=7460 GN=SF3A3 PE=4 SV=1
A0A088AJ32	76.65	10	2	2	31111	Uncharacterized protein OS=Apis mellifera OX=7460 PE=4 SV=1
A0A088A9Q3	76.57	10	2	2	57142	Uncharacterized protein OS=Apis mellifera OX=7460 PE=4 SV=1
A0A088AS00	74.43	10	1	1	22439	1 2-dihydroxy-3-keto-5-methylthiopentene dioxygenase OS=Apis mellifera OX=7460 GN=LOC551839 PE=3 SV=1
A0A088ASJ1	74.41	10	2	2	26315	Uncharacterized protein OS=Apis mellifera OX=7460 PE=4 SV=1
A0A088AKM4	73.64	10	2	2	33735	Uncharacterized protein OS=Apis mellifera OX=7460 GN=CREG PE=4 SV=1
A0A088A5I9	71.92	10	1	1	16938	Uncharacterized protein OS=Apis mellifera OX=7460 GN=eIF-1A PE=3 SV=1
A0A088ASD4	71.39	10	3	3	65214	Uncharacterized protein OS=Apis mellifera OX=7460 GN=LOC551840 PE=4 SV=1
A0A087ZVA0	70.75	10	1	1	17061	Uncharacterized protein OS=Apis mellifera OX=7460 GN=LOC725076 PE=4 SV=1
Q1W636	69.74	10	1	1	15000	OBP18 OS=Apis mellifera OX=7460 PE=2 SV=1
A0A088AJF4	69.3	10	1	1	20295	Uncharacterized protein OS=Apis mellifera OX=7460 GN=UbcD2 PE=3 SV=1
A0A088AQG0	65.01	10	2	2	40603	Uncharacterized protein OS=Apis mellifera OX=7460 GN=LOC727141 PE=4 SV=1
A0A088AC16	63.86	10	1	1	19434	Uncharacterized protein OS=Apis mellifera OX=7460 GN=LOC408608 PE=4 SV=1
A0A088AEN1	62.58	10	1	1	22542	Uncharacterized protein OS=Apis mellifera OX=7460 PE=4 SV=1
A0A087ZWJ0	62.5	10	1	1	21159	Uncharacterized protein OS=Apis mellifera OX=7460 PE=4 SV=1
A0A088AUN1	61.67	10	3	3	51554	Uncharacterized protein OS=Apis mellifera OX=7460 PE=4 SV=1
A0A087ZW69	61.28	10	1	1	26081	Uncharacterized protein OS=Apis mellifera OX=7460 GN=loj PE=3 SV=1
A0A087ZXK8	55.18	10	2	2	32873	Uncharacterized protein OS=Apis mellifera OX=7460 GN=100577121 PE=4 SV=1
A0A088ATP7	53.45	10	2	2	32125	Uncharacterized protein OS=Apis mellifera OX=7460 PE=4 SV=1
A0A087ZTN9	53.43	10	1	1	22502	Uncharacterized protein OS=Apis mellifera OX=7460 GN=LOC726145 PE=3 SV=1
A0A088AIB1	47.36	10	1	1	31060	Uncharacterized protein OS=Apis mellifera OX=7460 GN=LOC552334 PE=4 SV=1
A0A087ZYB2	47.14	10	1	1	34372	Nucleoporin NUP53 OS=Apis mellifera OX=7460 PE=3 SV=1
A0A087ZUJ8	46.83	10	2	2	46904	Uncharacterized protein OS=Apis mellifera OX=7460 PE=4 SV=1
A0A087ZP66	45.36	10	1	1	20725	Uncharacterized protein OS=Apis mellifera OX=7460 GN=mRpL48 PE=4 SV=1
A0A088AH01	42.77	10	1	1	23844	Uncharacterized protein OS=Apis mellifera OX=7460 GN=LOC410897 PE=4 SV=1
A0A088ACE7	39.1	10	1	1	20520	Uncharacterized protein OS=Apis mellifera OX=7460 GN=LOC551458 PE=4 SV=1
A0A087ZU00	39.1	10	1	1	18715	Uncharacterized protein OS=Apis mellifera OX=7460 GN=102654257 PE=4 SV=1
A0A088ALK3	37.54	10	1	1	13943	Mitochondrial pyruvate carrier OS=Apis mellifera OX=7460 GN=LOC413186 PE=3 SV=1
A0A088AEL4	36.97	10	1	1	32610	Uncharacterized protein OS=Apis mellifera OX=7460 GN=SpdS PE=3 SV=1
A0A088A899	35.65	10	1	1	16130	Uncharacterized protein OS=Apis mellifera OX=7460 PE=4 SV=1
A0A088AQL9	35.34	10	1	1	13925	Uncharacterized protein OS=Apis mellifera OX=7460 GN=LOC724794 PE=4 SV=1
A0A088AIY2	33.74	10	1	1	17264	Uncharacterized protein OS=Apis mellifera OX=7460 GN=mago PE=4 SV=1
A0A087ZMS6	30.94	10	1	1	35648	Galactose-1-phosphate uridylyltransferase OS=Apis mellifera OX=7460 PE=4 SV=1
A0A088A314	30.9	10	1	1	12348	Uncharacterized protein OS=Apis mellifera OX=7460 GN=LOC726894 PE=4 SV=1
A0A087ZPG7	30.33	10	1	1	13475	Uncharacterized protein OS=Apis mellifera OX=7460 PE=4 SV=1
A0A087ZZ63	30.08	10	1	1	11154	Uncharacterized protein OS=Apis mellifera OX=7460 GN=LOC408918 PE=4 SV=1
A0A087ZZV1	28.79	10	1	1	21737	5-demethoxyubiquinone hydroxylase mitochondrial OS=Apis mellifera OX=7460 GN=Coq7 PE=3 SV=1
Q38RA5	27.27	10	1	1	13636	Lipophorin receptor (Fragment) OS=Apis mellifera OX=7460 PE=2 SV=1
A0A088AJT3	265.82	11	6	6	50844	Uncharacterized protein OS=Apis mellifera OX=7460 PE=4 SV=1
A0A087ZV82	256.15	11	14	14	189436	Uncharacterized protein OS=Apis mellifera OX=7460 PE=4 SV=1
A0A088ANG3	219.16	11	10	10	150068	Uncharacterized protein OS=Apis mellifera OX=7460 PE=4 SV=1
A0A088AL67	217.84	11	10	10	146379	Uncharacterized protein OS=Apis mellifera OX=7460 PE=4 SV=1
A0A088A461	194.31	11	8	8	102618	Transient receptor potential cation channel protein painless OS=Apis mellifera OX=7460 GN=Pain PE=2 SV=1
A0A088A510	178.47	11	4	4	55451	Uncharacterized protein OS=Apis mellifera OX=7460 GN=tral PE=4 SV=1
A0A088A3B9	173.61	11	7	7	109541	Uncharacterized protein OS=Apis mellifera OX=7460 GN=LOC413796 PE=3 SV=1
A0A0B4J2N5	165.21	11	6	6	78660	Uncharacterized protein OS=Apis mellifera OX=7460 GN=bel PE=3 SV=1
A0A088AQP3	160.39	11	3	1	38681	Uncharacterized protein OS=Apis mellifera OX=7460 PE=4 SV=1
A0A088AMC3	152.95	11	6	6	101103	Uncharacterized protein OS=Apis mellifera OX=7460 PE=4 SV=1
A0A087ZZJ4	152.3	11	6	6	115394	Uncharacterized protein OS=Apis mellifera OX=7460 PE=4 SV=1
A0A088AUT8	147.66	11	4	4	77247	Trehalase OS=Apis mellifera OX=7460 GN=LOC410795 PE=3 SV=1
A0A088AA85	145.8	11	4	4	38455	Uncharacterized protein OS=Apis mellifera OX=7460 PE=4 SV=1
A0A088AEG7	136.95	11	4	4	89411	Uncharacterized protein OS=Apis mellifera OX=7460 GN=gprs PE=4 SV=1
A0A088A1B8	135.53	11	5	5	93876	Nuclear pore protein OS=Apis mellifera OX=7460 GN=LOC410343 PE=3 SV=1
A0A087ZR95	133.9	11	6	6	89185	Uncharacterized protein OS=Apis mellifera OX=7460 GN=Aats-gln PE=3 SV=1
A0A087ZY83	132.07	11	5	5	64022	Uncharacterized protein OS=Apis mellifera OX=7460 GN=LOC409991 PE=4 SV=1
A0A087ZVQ0	127.68	11	4	4	68720	Uncharacterized protein OS=Apis mellifera OX=7460 GN=car PE=3 SV=1
A0A088ARL5	127.51	11	3	3	50002	Uncharacterized protein OS=Apis mellifera OX=7460 PE=4 SV=1
A0A087ZPU1	124.76	11	2	2	28096	Uncharacterized protein OS=Apis mellifera OX=7460 GN=LOC724721 PE=3 SV=1
A0A088A1C1	121.54	11	3	3	61132	Uncharacterized protein OS=Apis mellifera OX=7460 GN=LOC410341 PE=4 SV=1
A0A088A3T9	109.77	11	2	2	36443	Uncharacterized protein OS=Apis mellifera OX=7460 GN=LOC409366 PE=4 SV=1
A0A087ZNE1	109.76	11	2	2	29364	Uncharacterized protein OS=Apis mellifera OX=7460 PE=4 SV=1
A0A088AW81	108.59	11	3	3	42500	Uncharacterized protein OS=Apis mellifera OX=7460 GN=LOC411858 PE=3 SV=1
A0A088AUZ0	107.34	11	4	4	55068	Uncharacterized protein OS=Apis mellifera OX=7460 GN=Ero1L PE=4 SV=1
A0A088ABW1	105.44	11	2	2	30230	Uncharacterized protein OS=Apis mellifera OX=7460 PE=4 SV=1
A0A088ADX3	101.87	11	3	3	41452	Uncharacterized protein OS=Apis mellifera OX=7460 GN=LOC412670 PE=3 SV=1
A0A088A8P7	100.75	11	2	2	22555	Uncharacterized protein OS=Apis mellifera OX=7460 GN=413835 PE=4 SV=1
A0A087ZZL2	100.19	11	4	4	72352	Uncharacterized protein OS=Apis mellifera OX=7460 GN=LOC724672 PE=4 SV=1
A0A087ZTY2	99.37	11	2	2	31678	Uncharacterized protein OS=Apis mellifera OX=7460 PE=4 SV=1
A0A088AMR6	99.18	11	5	5	80972	Uncharacterized protein OS=Apis mellifera OX=7460 PE=4 SV=1
A0A088AP95	97.49	11	2	2	53652	Uncharacterized protein OS=Apis mellifera OX=7460 PE=4 SV=1
A0A088AIP6	94.24	11	3	3	38634	Uncharacterized protein OS=Apis mellifera OX=7460 PE=4 SV=1
A0A087ZVW6	93.56	11	1	1	23649	Uncharacterized protein OS=Apis mellifera OX=7460 GN=fh PE=4 SV=1
A0A087ZN48	92.77	11	3	3	51940	Uncharacterized protein OS=Apis mellifera OX=7460 GN=LOC410449 PE=4 SV=1
A0A088A330	91.88	11	1	1	25792	Uncharacterized protein OS=Apis mellifera OX=7460 GN=LOC552786 PE=3 SV=1
A0A088AFW6	89.73	11	2	2	28290	Uncharacterized protein OS=Apis mellifera OX=7460 PE=4 SV=1
D9MWM7	87.04	11	3	3	59185	Fatty acyl-CoA reductase OS=Apis mellifera OX=7460 GN=FAR1 PE=2 SV=1
A0A088ARK6	85.66	11	2	2	36601	Purine nucleoside phosphorylase OS=Apis mellifera OX=7460 GN=LOC408299 PE=3 SV=1
A0A088AU55	84.58	11	2	2	29013	Uncharacterized protein OS=Apis mellifera OX=7460 PE=4 SV=1
H9JZY2	83.47	11	2	2	14336	Uncharacterized protein OS=Apis mellifera OX=7460 GN=LOC725881 PE=4 SV=1
A0A088AD00	82.23	11	2	2	36772	Uncharacterized protein OS=Apis mellifera OX=7460 GN=LOC410167 PE=4 SV=1
A0A088AFU8	80.16	11	2	2	17318	Uncharacterized protein OS=Apis mellifera OX=7460 PE=4 SV=1
A0A088AW53	76.88	11	3	3	52384	Uncharacterized protein OS=Apis mellifera OX=7460 GN=727261 PE=4 SV=1
A0A088AQR4	76.85	11	2	2	26760	Uncharacterized protein OS=Apis mellifera OX=7460 PE=4 SV=1
A0A087ZVI9	73.56	11	1	1	26313	ATP-dependent Clp protease proteolytic subunit OS=Apis mellifera OX=7460 GN=LOC409011 PE=3 SV=1
A0A088A8V7	70.07	11	2	2	27740	Uncharacterized protein OS=Apis mellifera OX=7460 GN=SrpRbeta PE=4 SV=1
A0A087ZR57	69.32	11	1	1	19128	Uncharacterized protein OS=Apis mellifera OX=7460 PE=4 SV=1
A0A088ALL7	66.46	11	2	2	9313	Uncharacterized protein OS=Apis mellifera OX=7460 GN=LOC726747 PE=4 SV=1
A0A088AEU9	65.66	11	1	1	17315	Uncharacterized protein OS=Apis mellifera OX=7460 PE=4 SV=1
A0A087ZYQ5	64.82	11	2	2	33003	Uncharacterized protein OS=Apis mellifera OX=7460 PE=4 SV=1
A0A088A8C9	64.46	11	1	1	12376	Uncharacterized protein OS=Apis mellifera OX=7460 GN=102654007 PE=4 SV=1
A0A088AEY6	64.28	11	1	1	18092	Uncharacterized protein OS=Apis mellifera OX=7460 GN=100578218 PE=4 SV=1
A0A088AW16	64.17	11	1	1	12972	Uncharacterized protein OS=Apis mellifera OX=7460 PE=4 SV=1
A0A087ZW82	61.11	11	2	2	28525	Uncharacterized protein OS=Apis mellifera OX=7460 GN=102655411 PE=4 SV=1
A0A088AUA4	60.99	11	2	2	43372	Uncharacterized protein OS=Apis mellifera OX=7460 GN=LOC552091 PE=4 SV=1
A0A087ZSR8	60.38	11	2	2	32632	Uncharacterized protein OS=Apis mellifera OX=7460 GN=LOC408966 PE=4 SV=1
A0A087ZNY9	59.43	11	1	1	14451	Uncharacterized protein OS=Apis mellifera OX=7460 GN=RpL35 PE=3 SV=1
A0A0S2LSJ8	59.17	11	1	1	14047	NADH-ubiquinone oxidoreductase chain 3 OS=Apis mellifera OX=7460 GN=ND3 PE=3 SV=1
A0A291LR96	59.17	11	1	1	13965	NADH-ubiquinone oxidoreductase chain 3 OS=Apis mellifera OX=7460 GN=ND3 PE=3 SV=1
A0A347ZMV1	59.17	11	1	1	14036	NADH-ubiquinone oxidoreductase chain 3 OS=Apis mellifera OX=7460 GN=ND3 PE=3 SV=1
A0A087ZYW8	56.83	11	2	2	34284	Uncharacterized protein OS=Apis mellifera OX=7460 PE=4 SV=1
A0A087ZRN3	54.92	11	2	2	31688	Uncharacterized protein OS=Apis mellifera OX=7460 GN=LOC412666 PE=4 SV=1
A0A088AA28	54.24	11	1	1	10652	Uncharacterized protein OS=Apis mellifera OX=7460 PE=4 SV=1
A0A088AJT1	52.22	11	2	2	28667	Uncharacterized protein OS=Apis mellifera OX=7460 GN=LOC726887 PE=4 SV=1
A0A088AJ35	50.51	11	1	1	18978	Uncharacterized protein OS=Apis mellifera OX=7460 GN=mRpS17 PE=4 SV=1
A0A087ZNP5	49.65	11	2	2	39183	Uncharacterized protein OS=Apis mellifera OX=7460 PE=4 SV=1
A0A087ZR60	48.95	11	1	1	14344	COX assembly mitochondrial protein OS=Apis mellifera OX=7460 GN=LOC552802 PE=3 SV=1
A0A088AW61	48.83	11	1	1	16744	Uncharacterized protein OS=Apis mellifera OX=7460 PE=4 SV=1
A0A088ADQ8	47.75	11	1	1	17216	Uncharacterized protein OS=Apis mellifera OX=7460 GN=UbcD6 PE=3 SV=1
A0A088AF07	45.47	11	1	1	20164	Uncharacterized protein OS=Apis mellifera OX=7460 GN=LOC408522 PE=3 SV=1
A0A087ZMX7	42.89	11	1	1	21219	Uncharacterized protein OS=Apis mellifera OX=7460 GN=LOC408424 PE=4 SV=1
A0A088AHC4	37.94	11	1	1	16621	Uncharacterized protein OS=Apis mellifera OX=7460 PE=4 SV=1
A0A088A340	34.27	11	1	1	9646	Peptidylprolyl isomerase OS=Apis mellifera OX=7460 PE=4 SV=1
A0A088AD98	33.97	11	1	1	24661	Uncharacterized protein OS=Apis mellifera OX=7460 GN=LOC551148 PE=4 SV=1
A0A088ANN6	33.22	11	1	1	24565	Uncharacterized protein OS=Apis mellifera OX=7460 GN=LOC724720 PE=4 SV=1
A0A087ZTM2	33.19	11	1	1	21068	Uncharacterized protein OS=Apis mellifera OX=7460 GN=Ard1 PE=4 SV=1
A0A088A396	31.21	11	1	1	35694	Uncharacterized protein OS=Apis mellifera OX=7460 GN=LOC409725 PE=4 SV=1
A0A088AQJ1	29.64	11	1	1	13912	Uncharacterized protein OS=Apis mellifera OX=7460 PE=4 SV=1
A0A088AMH7	27.84	11	1	1	25836	Methionine aminopeptidase OS=Apis mellifera OX=7460 GN=LOC724879 PE=3 SV=1
A0A087ZY96	333.55	12	32	32	446012	Uncharacterized protein OS=Apis mellifera OX=7460 PE=4 SV=1
A0A088AEP0	294.87	12	23	23	389627	Uncharacterized protein OS=Apis mellifera OX=7460 PE=4 SV=1
A0A088ARK1	268.41	12	20	20	262258	Uncharacterized protein OS=Apis mellifera OX=7460 PE=4 SV=1
A0A088A932	262.95	12	17	17	239898	Uncharacterized protein OS=Apis mellifera OX=7460 PE=3 SV=1
A0A088A7M7	240.6	12	13	13	171079	Uncharacterized protein OS=Apis mellifera OX=7460 PE=4 SV=1
A0A088A3H1	233.39	12	11	11	166871	Uncharacterized protein OS=Apis mellifera OX=7460 PE=4 SV=1
A0A088AIQ7	230.27	12	20	20	306727	Uncharacterized protein OS=Apis mellifera OX=7460 PE=4 SV=1
A0A087ZND5	218.01	12	17	17	201210	Uncharacterized protein OS=Apis mellifera OX=7460 PE=4 SV=1
A0A088ATJ3	180.58	12	17	17	214284	Uncharacterized protein OS=Apis mellifera OX=7460 PE=4 SV=1
A0A087ZMS4	178.11	12	8	8	119390	Uncharacterized protein OS=Apis mellifera OX=7460 GN=Ge-1 PE=4 SV=1
A0A087ZMS3	177.74	12	6	6	101064	Diacylglycerol kinase OS=Apis mellifera OX=7460 GN=Dgk PE=3 SV=1
A0A087ZQM4	170.04	12	5	5	87190	Uncharacterized protein OS=Apis mellifera OX=7460 GN=LOC409927 PE=4 SV=1
A0A088A0M9	165.84	12	8	8	145435	Uncharacterized protein OS=Apis mellifera OX=7460 PE=4 SV=1
A0A088A153	164.77	12	7	7	74594	Uncharacterized protein OS=Apis mellifera OX=7460 GN=LOC409152 PE=4 SV=1
A0A088A9V7	161.53	12	5	5	65760	Uncharacterized protein OS=Apis mellifera OX=7460 GN=LOC411909 PE=4 SV=1
A0A088A104	160.31	12	9	9	125502	Uncharacterized protein OS=Apis mellifera OX=7460 GN=Upf1 PE=4 SV=1
A0A088AVI9	155.69	12	11	11	141858	Uncharacterized protein OS=Apis mellifera OX=7460 GN=rdgB PE=4 SV=1
A0A088A093	155.07	12	8	8	95611	Uncharacterized protein OS=Apis mellifera OX=7460 PE=4 SV=1
A0A088AES1	148.57	12	4	4	49537	Uncharacterized protein OS=Apis mellifera OX=7460 GN=LOC100379261 PE=4 SV=1
A0A088ABT0	148.34	12	7	7	103288	Uncharacterized protein OS=Apis mellifera OX=7460 GN=pug PE=3 SV=1
Q3B708	148.18	12	3	3	25400	Troponin I isoform 6a1 OS=Apis mellifera OX=7460 GN=TpnI PE=4 SV=1
A8J4S9	147.66	12	4	4	72817	Trehalase OS=Apis mellifera OX=7460 PE=1 SV=1
A0A087ZW72	145.62	12	4	4	41918	Uncharacterized protein OS=Apis mellifera OX=7460 GN=LOC409766 PE=4 SV=1
A0A088A9H8	144.07	12	7	7	72682	Uncharacterized protein OS=Apis mellifera OX=7460 GN=727399 PE=4 SV=1
A0A087ZY03	138.8	12	6	6	67142	Uncharacterized protein OS=Apis mellifera OX=7460 PE=4 SV=1
A0A088AQX7	133.15	12	7	7	93585	Uncharacterized protein OS=Apis mellifera OX=7460 PE=3 SV=1
A0A088A1R3	130.3	12	3	3	27879	Uncharacterized protein OS=Apis mellifera OX=7460 PE=4 SV=1
A0A088AA01	128.71	12	4	4	49356	Uncharacterized protein OS=Apis mellifera OX=7460 GN=Trx1-like3 PE=4 SV=1
A0A088AGJ5	126.81	12	6	6	81800	Uncharacterized protein OS=Apis mellifera OX=7460 GN=LOC551824 PE=4 SV=1
A0A088AET0	126.32	12	4	4	61611	Uncharacterized protein OS=Apis mellifera OX=7460 GN=Sply PE=3 SV=1
A0A088ABL3	126.21	12	4	4	55578	Uncharacterized protein OS=Apis mellifera OX=7460 GN=P58IPK PE=4 SV=1
A0A087ZRM7	124.15	12	2	2	23504	Clathrin light chain OS=Apis mellifera OX=7460 GN=Clc PE=3 SV=1
A0A088A8C5	121.25	12	4	4	59761	Uncharacterized protein OS=Apis mellifera OX=7460 PE=4 SV=1
A0A088ACI6	121.05	12	5	5	69324	Uncharacterized protein OS=Apis mellifera OX=7460 GN=LOC413791 PE=4 SV=1
A0A088ADZ2	116.54	12	3	3	47578	Uncharacterized protein OS=Apis mellifera OX=7460 PE=4 SV=1
A0A088AEP8	114.68	12	4	4	68640	Uncharacterized protein OS=Apis mellifera OX=7460 GN=LOC413697 PE=4 SV=1
A0A087ZSX5	114.01	12	3	3	35754	Uncharacterized protein OS=Apis mellifera OX=7460 PE=4 SV=1
A0A088ADA6	113.69	12	2	2	20280	Uncharacterized protein OS=Apis mellifera OX=7460 GN=LOC551483 PE=4 SV=1
A0A088AGB1	112.94	12	2	2	25302	Uncharacterized protein OS=Apis mellifera OX=7460 GN=LOC412554 PE=3 SV=1
A0A087ZVA1	110.03	12	6	6	89249	Uncharacterized protein OS=Apis mellifera OX=7460 GN=BicD PE=4 SV=1
A0A088AJI8	108.88	12	3	3	28279	Uncharacterized protein OS=Apis mellifera OX=7460 GN=shu PE=4 SV=1
A0A088A4R3	105.96	12	2	2	25597	Uncharacterized protein OS=Apis mellifera OX=7460 PE=3 SV=1
A0A088ADU4	102.16	12	3	3	40873	Alpha-tubulin N-acetyltransferase OS=Apis mellifera OX=7460 GN=726664 PE=3 SV=1
A0A088AQS0	101.61	12	2	2	24891	Uncharacterized protein OS=Apis mellifera OX=7460 PE=4 SV=1
A0A087ZSW3	100.9	12	3	3	33142	Uncharacterized protein OS=Apis mellifera OX=7460 GN=726314 PE=4 SV=1
A0A087ZXL9	98.19	12	3	3	46335	Uncharacterized protein OS=Apis mellifera OX=7460 GN=LOC413435 PE=4 SV=1
A0A088ATF1	97.36	12	2	2	23551	Uncharacterized protein OS=Apis mellifera OX=7460 GN=LOC552372 PE=4 SV=1
A0A088A287	97.28	12	3	3	37878	Uncharacterized protein OS=Apis mellifera OX=7460 PE=4 SV=1
A0A088AFV8	89.16	12	2	2	28014	Uncharacterized protein OS=Apis mellifera OX=7460 PE=4 SV=1
H9KTC9	87.46	12	1	1	18842	Uncharacterized protein OS=Apis mellifera OX=7460 PE=4 SV=1
A0A087ZYZ4	86.09	12	2	2	24577	Vacuolar protein sorting-associated protein 28 homolog OS=Apis mellifera OX=7460 GN=408783 PE=3 SV=1
A0A087ZS18	85.95	12	3	3	49080	Uncharacterized protein OS=Apis mellifera OX=7460 GN=Bap55 PE=3 SV=1
A0A088AIL9	83.52	12	2	2	33570	Uncharacterized protein OS=Apis mellifera OX=7460 PE=4 SV=1
A0A087ZV19	80.94	12	4	4	46928	Uncharacterized protein OS=Apis mellifera OX=7460 GN=La PE=4 SV=1
A0A088AAU4	80.4	12	2	2	27723	Uncharacterized protein OS=Apis mellifera OX=7460 PE=4 SV=1
A0A088AMH4	78.74	12	2	2	27381	Uncharacterized protein OS=Apis mellifera OX=7460 GN=trsn PE=4 SV=1
A0A088A5M4	78.59	12	2	2	34858	Uncharacterized protein OS=Apis mellifera OX=7460 GN=LOC551229 PE=4 SV=1
A0A088A886	74.82	12	2	2	34615	Uncharacterized protein OS=Apis mellifera OX=7460 GN=LOC413852 PE=4 SV=1
A0A088ASR9	67.29	12	1	1	17794	Uncharacterized protein OS=Apis mellifera OX=7460 GN=LOC726696 PE=4 SV=1
A0A088AHJ4	65.42	12	3	3	65267	Uncharacterized protein OS=Apis mellifera OX=7460 PE=4 SV=1
A0A088AGE4	65.35	12	1	1	22168	Uncharacterized protein OS=Apis mellifera OX=7460 GN=LOC552690 PE=4 SV=1
A0A087ZT28	63.12	12	2	2	23024	Uncharacterized protein OS=Apis mellifera OX=7460 GN=LOC409529 PE=4 SV=1
A0A088AFK3	62.28	12	1	1	27111	Peptide deformylase OS=Apis mellifera OX=7460 GN=102654737 PE=3 SV=1
A0A088ADR9	62.1	12	1	1	19668	Uncharacterized protein OS=Apis mellifera OX=7460 PE=4 SV=1
A0A088A3M3	57.04	12	2	2	37852	Uncharacterized protein OS=Apis mellifera OX=7460 GN=mRpS35 PE=4 SV=1
A0A088AIJ0	50.48	12	1	1	18396	Uncharacterized protein OS=Apis mellifera OX=7460 PE=4 SV=1
A0A088ATA9	50.37	12	2	2	28123	Uncharacterized protein OS=Apis mellifera OX=7460 PE=4 SV=1
A0A088ANJ4	46.31	12	2	2	27985	Uncharacterized protein OS=Apis mellifera OX=7460 GN=RPA2 PE=4 SV=1
A0A087ZYN1	44.17	12	1	1	14325	Uncharacterized protein OS=Apis mellifera OX=7460 GN=LOC725311 PE=4 SV=1
A0A088AEQ9	43.19	12	1	1	26863	Uncharacterized protein OS=Apis mellifera OX=7460 GN=mRpS7 PE=3 SV=1
A0A088A8Q8	42.36	12	1	1	19553	Uncharacterized protein OS=Apis mellifera OX=7460 GN=LOC725316 PE=4 SV=1
A0A088A5Z6	40.84	12	1	1	12792	Uncharacterized protein OS=Apis mellifera OX=7460 GN=LOC726653 PE=4 SV=1
A0A088AG71	40.79	12	1	1	15811	Uncharacterized protein OS=Apis mellifera OX=7460 GN=100577527 PE=4 SV=1
Q1W633	40.21	12	1	1	15204	OBP21 OS=Apis mellifera OX=7460 GN=Obp21 PE=2 SV=1
A0A088A8N1	38.36	12	1	1	17218	Uncharacterized protein OS=Apis mellifera OX=7460 PE=4 SV=1
A0A088AFY7	38.02	12	1	1	11136	Uncharacterized protein OS=Apis mellifera OX=7460 PE=4 SV=1
A0A088AU03	37.99	12	1	1	13529	Uncharacterized protein OS=Apis mellifera OX=7460 PE=4 SV=1
A0A087ZUI1	35.29	12	1	1	12984	Uncharacterized protein OS=Apis mellifera OX=7460 PE=4 SV=1
A0A088AF01	34.68	12	1	1	8557	Small nuclear ribonucleoprotein G OS=Apis mellifera OX=7460 GN=SmG PE=3 SV=1
A0A088A2R7	34.22	12	1	1	16257	Uncharacterized protein OS=Apis mellifera OX=7460 GN=727210 PE=3 SV=1
A0A088A1F9	33.38	12	1	1	13832	Uncharacterized protein OS=Apis mellifera OX=7460 PE=4 SV=1
A0A087ZRM2	29.5	12	1	1	15782	Ubiquitin-like protein OS=Apis mellifera OX=7460 PE=4 SV=1
A0A087ZR35	274.17	13	9	9	140149	Uncharacterized protein OS=Apis mellifera OX=7460 GN=pita PE=4 SV=1
A0A088AEZ4	224.23	13	4	1	49865	Tubulin alpha chain OS=Apis mellifera OX=7460 GN=LOC552766 PE=3 SV=1
A0A088AB96	218.37	13	6	6	79564	Uncharacterized protein OS=Apis mellifera OX=7460 PE=3 SV=1
A0A088A4M6	216.35	13	7	7	79354	Uncharacterized protein OS=Apis mellifera OX=7460 GN=LOC410041 PE=4 SV=1
A0A088AAR1	211.51	13	9	9	99701	Uncharacterized protein OS=Apis mellifera OX=7460 GN=LOC552477 PE=3 SV=1
A0A088A6Z0	207.85	13	7	7	94116	Uncharacterized protein OS=Apis mellifera OX=7460 GN=p115 PE=4 SV=1
A0A088AI22	190.67	13	7	7	76075	Uncharacterized protein OS=Apis mellifera OX=7460 PE=4 SV=1
A0A088AG18	186.52	13	8	8	100100	Uncharacterized protein OS=Apis mellifera OX=7460 GN=Sap-r PE=4 SV=1
A0A088AA44	183.63	13	9	9	110384	Uncharacterized protein OS=Apis mellifera OX=7460 GN=LOC410414 PE=4 SV=1
A0A088AI92	183.24	13	10	10	105011	Aminopeptidase OS=Apis mellifera OX=7460 PE=3 SV=1
A0A088AQX2	181.02	13	5	5	63405	Eukaryotic translation initiation factor 3 subunit L OS=Apis mellifera OX=7460 GN=LOC552056 PE=3 SV=1
A0A088A013	176.7	13	2	2	17210	Uncharacterized protein OS=Apis mellifera OX=7460 GN=LOC726337 PE=4 SV=1
A0A088AR59	175.85	13	6	6	91188	Hepatocyte growth factor-regulated tyrosine kinase substrate OS=Apis mellifera OX=7460 GN=Hrs PE=4 SV=1
A0A088AM29	172.44	13	7	7	65179	Uncharacterized protein OS=Apis mellifera OX=7460 GN=LOC552734 PE=4 SV=1
A0A088AF88	170.43	13	10	10	125354	Uncharacterized protein OS=Apis mellifera OX=7460 GN=Ranbp16 PE=4 SV=1
A0A087ZRX1	152.44	13	6	6	100145	Uncharacterized protein OS=Apis mellifera OX=7460 GN=410078 PE=4 SV=1
A0A088AVB0	150.56	13	6	6	71727	Uncharacterized protein OS=Apis mellifera OX=7460 GN=LOC410849 PE=3 SV=1
A0A088ACK3	140.24	13	5	5	77915	Uncharacterized protein OS=Apis mellifera OX=7460 PE=4 SV=1
A0A087ZR09	138.86	13	5	5	68433	Uncharacterized protein OS=Apis mellifera OX=7460 GN=pix PE=4 SV=1
A0A087ZQD2	133.52	13	4	4	52807	Uncharacterized protein OS=Apis mellifera OX=7460 PE=3 SV=1
A0A0B5EEN9	133.52	13	4	4	53457	Gamma-aminobutyric acid receptor RDL subunit OS=Apis mellifera OX=7460 GN=RDL PE=2 SV=1
A0A087ZSG8	132.51	13	3	3	52015	Uncharacterized protein OS=Apis mellifera OX=7460 GN=LOC552049 PE=4 SV=1
A0A088A2F9	131.31	13	2	2	22733	Small nuclear ribonucleoprotein-associated protein OS=Apis mellifera OX=7460 GN=Smb PE=3 SV=1
Q5W7P2	129.41	13	6	6	78674	Soluble guanylyl cyclase alpha 1 subunit OS=Apis mellifera OX=7460 GN=AmsGC alpha-1 PE=2 SV=1
A0A088ACC0	129.25	13	5	5	62140	Uncharacterized protein OS=Apis mellifera OX=7460 GN=LOC724212 PE=4 SV=1
A0A088ARH5	125.28	13	3	3	41160	NAD-dependent protein deacetylase OS=Apis mellifera OX=7460 GN=Sirt2 PE=3 SV=1
A0A088AUJ3	124.12	13	6	6	61106	Uncharacterized protein OS=Apis mellifera OX=7460 GN=LOC552073 PE=4 SV=1
A0A087ZR56	124.11	13	2	2	37383	Uncharacterized protein OS=Apis mellifera OX=7460 GN=LOC412599 PE=4 SV=1
A0A087ZTW9	121.2	13	3	2	48688	Uncharacterized protein OS=Apis mellifera OX=7460 PE=3 SV=1
A0A087ZVN5	116.4	13	4	4	37205	Uncharacterized protein OS=Apis mellifera OX=7460 GN=LOC409441 PE=4 SV=1
A0A087ZYD3	115.22	13	2	2	13186	Uncharacterized protein OS=Apis mellifera OX=7460 PE=4 SV=1
A0A087ZW57	114.19	13	2	2	32463	Uncharacterized protein OS=Apis mellifera OX=7460 PE=4 SV=1
T1SG89	113.74	13	4	4	61202	Calcium channel beta subunit variant c OS=Apis mellifera OX=7460 GN=Ca-beta PE=2 SV=1
T1SG86	113.74	13	4	4	61576	Calcium channel beta subunit variant a OS=Apis mellifera OX=7460 GN=Ca-beta PE=2 SV=1
A0A088A633	111.19	13	4	4	34510	Uncharacterized protein OS=Apis mellifera OX=7460 GN=LOC725146 PE=4 SV=1
A0A087ZP50	110.69	13	4	4	55654	Uncharacterized protein OS=Apis mellifera OX=7460 GN=LOC551780 PE=4 SV=1
A0A088AFI7	110.69	13	2	2	16295	Uncharacterized protein OS=Apis mellifera OX=7460 GN=CPF2 PE=4 SV=1
A0A088AUX7	110.63	13	2	2	22394	PRA1 family protein OS=Apis mellifera OX=7460 GN=LOC410130 PE=3 SV=1
A0A088A934	107.47	13	2	2	20708	Signal peptidase complex catalytic subunit SEC11 OS=Apis mellifera OX=7460 GN=Spase18-21 PE=3 SV=1
A0A088AE77	106.8	13	4	4	58035	Uncharacterized protein OS=Apis mellifera OX=7460 GN=NUP50 PE=4 SV=1
A0A088ARM7	102.77	13	2	2	27981	Uncharacterized protein OS=Apis mellifera OX=7460 GN=LOC724126 PE=4 SV=1
A0A088AER8	101.7	13	3	3	53494	Uncharacterized protein OS=Apis mellifera OX=7460 GN=LOC410577 PE=4 SV=1
A0A088AGV6	100.75	13	2	2	17853	Uncharacterized protein OS=Apis mellifera OX=7460 PE=4 SV=1
A0A088AH83	99.49	13	4	4	36279	Uncharacterized protein OS=Apis mellifera OX=7460 GN=LOC412678 PE=3 SV=1
A0A088ASL1	96.47	13	2	2	28494	Tetraspanin OS=Apis mellifera OX=7460 GN=Tspan9 PE=3 SV=1
A0A088ARS3	96.44	13	6	6	68855	Uncharacterized protein OS=Apis mellifera OX=7460 GN=bor PE=4 SV=1
A0A088AGZ4	95.89	13	3	3	45314	Uncharacterized protein OS=Apis mellifera OX=7460 GN=408710 PE=4 SV=1
A0A087ZR58	94.82	13	3	3	41585	Uncharacterized protein OS=Apis mellifera OX=7460 GN=100576333 PE=4 SV=1
A0A088ADE7	94.6	13	2	2	17599	Uncharacterized protein OS=Apis mellifera OX=7460 PE=4 SV=1
A0A088ANF9	94.41	13	3	3	41628	Uncharacterized protein OS=Apis mellifera OX=7460 GN=LOC412149 PE=4 SV=1
A0A087ZV20	94.41	13	3	3	48546	Uncharacterized protein OS=Apis mellifera OX=7460 GN=LOC408391 PE=3 SV=1
A0A088AMG0	94.4	13	2	2	23009	Proteasome subunit beta OS=Apis mellifera OX=7460 GN=LOC552579 PE=3 SV=1
A0A087ZXB2	94.2	13	4	4	53322	Protoporphyrinogen oxidase OS=Apis mellifera OX=7460 GN=Ppox PE=3 SV=1
A0A088AK63	90.52	13	1	1	15368	Uncharacterized protein OS=Apis mellifera OX=7460 GN=LOC409706 PE=4 SV=1
A0A088A5K1	89.46	13	2	2	21080	Uncharacterized protein OS=Apis mellifera OX=7460 GN=Ubc-E2H PE=3 SV=1
A0A088ACT1	88.14	13	2	2	20783	Uncharacterized protein OS=Apis mellifera OX=7460 GN=LOC409913 PE=4 SV=1
A0A088ARX8	84.24	13	4	4	44805	Uncharacterized protein OS=Apis mellifera OX=7460 GN=LOC552006 PE=4 SV=1
A0A088ATS9	83.59	13	2	2	26464	Uncharacterized protein OS=Apis mellifera OX=7460 PE=4 SV=1
A0A087ZV75	81.3	13	3	3	30914	Anamorsin homolog OS=Apis mellifera OX=7460 GN=LOC552386 PE=3 SV=1
A0A087ZU10	75.31	13	5	5	71839	Uncharacterized protein OS=Apis mellifera OX=7460 PE=4 SV=1
A0A088AW94	74.1	13	3	3	30440	Uncharacterized protein OS=Apis mellifera OX=7460 GN=Surf4 PE=4 SV=1
A0A088AIL1	72.55	13	2	2	35861	Uncharacterized protein OS=Apis mellifera OX=7460 GN=LOC412696 PE=4 SV=1
A0A087ZVS0	72.01	13	1	1	20175	Uncharacterized protein OS=Apis mellifera OX=7460 GN=LOC724676 PE=3 SV=1
I1Z8F4	68.94	13	2	2	33424	Transformer 2 transcript variant 284 OS=Apis mellifera OX=7460 GN=tra2 PE=2 SV=1
I1Z8F1	68.94	13	2	2	33511	Transformer 2 transcript variant 285 OS=Apis mellifera OX=7460 GN=tra2 PE=2 SV=1
H9KID5	66.1	13	1	1	10456	Small ubiquitin-related modifier OS=Apis mellifera OX=7460 GN=smt3 PE=3 SV=1
A0A088AP66	63.9	13	2	2	23199	Uncharacterized protein OS=Apis mellifera OX=7460 GN=100187709 PE=4 SV=1
A0A087ZUZ4	57.01	13	2	2	24624	Uncharacterized protein OS=Apis mellifera OX=7460 GN=LOC552442 PE=4 SV=1
A0A088ALQ4	49.64	13	1	1	18546	Uncharacterized protein OS=Apis mellifera OX=7460 PE=3 SV=1
A0A088A0H1	43.95	13	2	2	25859	Uncharacterized protein OS=Apis mellifera OX=7460 GN=LOC725796 PE=4 SV=1
A0A087ZQ38	40.42	13	1	1	19280	Uncharacterized protein OS=Apis mellifera OX=7460 GN=Tapdelta PE=4 SV=1
A0A088AL89	31.31	13	1	1	14371	Uncharacterized protein OS=Apis mellifera OX=7460 GN=LOC411870 PE=3 SV=1
A0A088AFV0	31.03	13	1	1	12883	Uncharacterized protein OS=Apis mellifera OX=7460 PE=4 SV=1
A0A087ZYV1	365.83	14	67	67	768969	Uncharacterized protein OS=Apis mellifera OX=7460 PE=4 SV=1
A0A088AV37	344.68	14	40	40	537888	Uncharacterized protein OS=Apis mellifera OX=7460 GN=LOC408677 PE=4 SV=1
A0A088ADM2	308.17	14	15	15	144934	Serine/threonine-protein phosphatase OS=Apis mellifera OX=7460 GN=LOC411046 PE=3 SV=1
A0A088A3X4	280.45	14	15	15	195174	Uncharacterized protein OS=Apis mellifera OX=7460 PE=4 SV=1
A0A088ANE7	257.88	14	11	11	129878	Uncharacterized protein OS=Apis mellifera OX=7460 PE=4 SV=1
A0A088A2T2	218.69	14	8	8	92770	Uncharacterized protein OS=Apis mellifera OX=7460 GN=stmA PE=4 SV=1
A0A088ARD0	205.36	14	8	8	93299	Uncharacterized protein OS=Apis mellifera OX=7460 GN=Hmt-1 PE=4 SV=1
A0A088ALU6	203.08	14	9	9	139596	Uncharacterized protein OS=Apis mellifera OX=7460 PE=4 SV=1
A0A087ZRU4	199.95	14	10	10	144039	Uncharacterized protein OS=Apis mellifera OX=7460 PE=4 SV=1
A0A088ANI3	184.81	14	12	12	144348	Uncharacterized protein OS=Apis mellifera OX=7460 GN=Aats-ile PE=3 SV=1
A0A088ADV7	172.61	14	5	5	58714	Importin subunit alpha OS=Apis mellifera OX=7460 GN=Kap-alpha1 PE=3 SV=1
A0A088AQ11	165.52	14	13	13	147680	Uncharacterized protein OS=Apis mellifera OX=7460 GN=LOC551331 PE=4 SV=1
P85799	164.79	14	3	3	40985	Prohormone-2 OS=Apis mellifera OX=7460 PE=1 SV=1
A0A087ZTU2	161.72	14	4	4	69206	Uncharacterized protein OS=Apis mellifera OX=7460 GN=Shal PE=3 SV=1
A0A088AJF1	155.84	14	3	1	28685	Serine/threonine-protein phosphatase OS=Apis mellifera OX=7460 PE=3 SV=1
A0A088A202	153.29	14	4	4	39859	Uncharacterized protein OS=Apis mellifera OX=7460 PE=4 SV=1
A0A087ZW58	151.69	14	5	4	34112	Uncharacterized protein OS=Apis mellifera OX=7460 GN=Cdk5 PE=3 SV=1
A0A088A5X8	151.53	14	3	3	45139	Uncharacterized protein OS=Apis mellifera OX=7460 GN=Nup44A PE=3 SV=1
A0A088AA53	147.96	14	5	5	61399	Uncharacterized protein OS=Apis mellifera OX=7460 GN=100577045 PE=4 SV=1
A0A087ZYP9	144.26	14	8	8	81838	Uncharacterized protein OS=Apis mellifera OX=7460 GN=Ddx1 PE=4 SV=1
A0A088AKA8	143.02	14	7	7	62309	Uncharacterized protein OS=Apis mellifera OX=7460 PE=3 SV=1
A0A087ZRY9	141.68	14	4	4	54042	Uncharacterized protein OS=Apis mellifera OX=7460 GN=LOC551009 PE=4 SV=1
A0A088AQA3	139.02	14	4	4	47067	3-oxoacyl-[acyl-carrier-protein] synthase OS=Apis mellifera OX=7460 GN=LOC413655 PE=3 SV=1
A0A088A7C0	134.72	14	5	5	66627	Uncharacterized protein OS=Apis mellifera OX=7460 GN=nkd PE=4 SV=1
Q0GQR7	133.52	14	4	4	50277	GABA-gated chloride channel (Fragment) OS=Apis mellifera OX=7460 PE=2 SV=1
A0A088ARS8	132.23	14	3	3	20122	Uncharacterized protein OS=Apis mellifera OX=7460 PE=4 SV=1
A0A088ANJ8	129.92	14	3	3	36025	Uncharacterized protein OS=Apis mellifera OX=7460 GN=LOC414038 PE=4 SV=1
A0A088ABB0	128.87	14	2	2	26496	Tetraspanin OS=Apis mellifera OX=7460 GN=Tspan12 PE=3 SV=1
A0A088A6Q4	124.06	14	3	3	39734	Uncharacterized protein OS=Apis mellifera OX=7460 GN=LOC725167 PE=4 SV=1
A0A088AWB0	123.86	14	2	2	23574	Uncharacterized protein OS=Apis mellifera OX=7460 PE=4 SV=1
A0A088A464	122.69	14	5	5	58484	Uncharacterized protein OS=Apis mellifera OX=7460 GN=LOC410054 PE=4 SV=1
A0A088ARG7	119.33	14	3	3	29954	Defective in cullin neddylation protein OS=Apis mellifera OX=7460 GN=LOC550726 PE=4 SV=1
A0A088A8P3	119.21	14	5	5	63307	Alkylglycerone-phosphate synthase OS=Apis mellifera OX=7460 PE=3 SV=1
A0A088AQ73	117.46	14	5	5	52564	Uncharacterized protein OS=Apis mellifera OX=7460 GN=LOC408945 PE=4 SV=1
A0A087ZYK4	116.13	14	3	3	36616	Uncharacterized protein OS=Apis mellifera OX=7460 GN=LOC413053 PE=4 SV=1
A0A087ZQI6	115.84	14	3	3	40424	Uncharacterized protein OS=Apis mellifera OX=7460 GN=LOC411573 PE=3 SV=1
A0A087ZMZ3	113.74	14	4	4	55185	Calcium channel beta subunit variant b OS=Apis mellifera OX=7460 GN=Ca-beta PE=4 SV=1
A0A088AIL4	113.15	14	5	5	71334	Uncharacterized protein OS=Apis mellifera OX=7460 PE=4 SV=1
A0A087ZZ12	109.8	14	3	3	35916	Uncharacterized protein OS=Apis mellifera OX=7460 GN=Ppcs PE=4 SV=1
A0A087ZPS0	107.6	14	5	5	55025	Glutathione synthetase OS=Apis mellifera OX=7460 GN=LOC411372 PE=3 SV=1
A0A088A787	106.97	14	3	3	35753	Uncharacterized protein OS=Apis mellifera OX=7460 PE=3 SV=1
A0A088AVZ4	106.97	14	3	3	35388	Uncharacterized protein OS=Apis mellifera OX=7460 PE=4 SV=1
A0A088A8B6	106.79	14	4	4	53465	Uncharacterized protein OS=Apis mellifera OX=7460 GN=Dlic PE=4 SV=1
A0A088ALQ3	104.38	14	1	1	15757	Uncharacterized protein OS=Apis mellifera OX=7460 GN=RpL28 PE=4 SV=1
A0A088ACT0	102.82	14	4	4	38964	Uncharacterized protein OS=Apis mellifera OX=7460 PE=4 SV=1
Q868G6	102.82	14	4	4	39039	Tachykinins OS=Apis mellifera OX=7460 GN=Atk PE=1 SV=1
A0A088AKA7	92.51	14	2	2	22123	Uncharacterized protein OS=Apis mellifera OX=7460 PE=4 SV=1
A0A088AAM8	90.3	14	3	3	31001	Uncharacterized protein OS=Apis mellifera OX=7460 GN=LOC410023 PE=4 SV=1
A0A088ANQ5	81.38	14	2	2	23411	Uncharacterized protein OS=Apis mellifera OX=7460 GN=LOC552602 PE=3 SV=1
A0A088A9A7	80.89	14	2	2	31717	Uncharacterized protein OS=Apis mellifera OX=7460 GN=LOC725594 PE=4 SV=1
A0A088APY3	78.24	14	3	3	60177	Uncharacterized protein OS=Apis mellifera OX=7460 GN=LOC408742 PE=4 SV=1
A0A087ZWA2	76.52	14	2	2	33288	Uncharacterized protein OS=Apis mellifera OX=7460 PE=4 SV=1
A0A088AKK4	76.24	14	1	1	17379	Uncharacterized protein OS=Apis mellifera OX=7460 PE=4 SV=1
A0A087ZXJ1	70.05	14	3	3	42264	Uncharacterized protein OS=Apis mellifera OX=7460 PE=4 SV=1
I1Z8F5	68.94	14	2	2	29293	Transformer 2 transcript variant 252 OS=Apis mellifera OX=7460 GN=tra2 PE=2 SV=1
I1Z8F2	68.94	14	2	2	29380	Transformer 2 transcript variant 253 OS=Apis mellifera OX=7460 GN=tra2 PE=2 SV=1
A0A088A3R3	67.31	14	2	2	24240	Uncharacterized protein OS=Apis mellifera OX=7460 PE=3 SV=1
A0A087ZQC8	65.41	14	1	1	17953	Uncharacterized protein OS=Apis mellifera OX=7460 PE=4 SV=1
A0A088A4F9	60.38	14	2	2	19537	Uncharacterized protein OS=Apis mellifera OX=7460 GN=100577418 PE=4 SV=1
A0A0B4J2M8	59.93	14	3	3	37330	Probable tRNA N6-adenosine threonylcarbamoyltransferase OS=Apis mellifera OX=7460 GN=LOC411654 PE=3 SV=1
A0A088AUS2	58.6	14	1	1	8385	Protein kish OS=Apis mellifera OX=7460 GN=LOC725059 PE=3 SV=1
A0A088APW5	48.76	14	1	1	20723	Uncharacterized protein OS=Apis mellifera OX=7460 GN=LOC726147 PE=4 SV=1
A0A088ATD9	44.5	14	1	1	7475	Uncharacterized protein OS=Apis mellifera OX=7460 PE=4 SV=1
A0A087ZPW4	36.89	14	1	1	12065	Enhancer of rudimentary homolog OS=Apis mellifera OX=7460 GN=e(r) PE=3 SV=1
A0A088A0Z8	254.21	15	14	14	141634	Uncharacterized protein OS=Apis mellifera OX=7460 PE=4 SV=1
A0A088ASK6	241.16	15	17	17	198089	Uncharacterized protein OS=Apis mellifera OX=7460 PE=4 SV=1
A0A087ZST3	237.92	15	9	9	104390	Eukaryotic translation initiation factor 3 subunit C OS=Apis mellifera OX=7460 GN=eIF3-S8 PE=3 SV=1
A0A088APM8	223.58	15	7	7	69916	Uncharacterized protein OS=Apis mellifera OX=7460 PE=4 SV=1
A0A088A8F0	214.23	15	10	10	115799	Putative H3K9 methyltransferase OS=Apis mellifera OX=7460 PE=4 SV=1
A0A088A150	207.76	15	4	4	54675	Amino acid transporter OS=Apis mellifera OX=7460 GN=LOC409919 PE=3 SV=1
A0A088AUK8	204.3	15	12	12	88569	Uncharacterized protein OS=Apis mellifera OX=7460 PE=4 SV=1
A0A088AP31	199.72	15	5	5	60535	Uncharacterized protein OS=Apis mellifera OX=7460 GN=Con PE=4 SV=1
A0A087ZYR9	191.35	15	8	8	62750	Uncharacterized protein OS=Apis mellifera OX=7460 GN=LOC408788 PE=3 SV=1
A0A088ADQ7	190.31	15	8	8	71685	Uncharacterized protein OS=Apis mellifera OX=7460 PE=3 SV=1
A0A088A0P6	182.35	15	4	4	46418	Uncharacterized protein OS=Apis mellifera OX=7460 GN=LOC551636 PE=4 SV=1
A0A088AI19	171.09	15	5	5	69634	Uncharacterized protein OS=Apis mellifera OX=7460 GN=726273 PE=4 SV=1
A0A088A2S3	167.7	15	8	8	88076	Uncharacterized protein OS=Apis mellifera OX=7460 GN=nito PE=4 SV=1
A0A088AMB2	162.3	15	5	5	60517	Uncharacterized protein OS=Apis mellifera OX=7460 GN=Aats-asp PE=3 SV=1
A0A088ABQ2	161.44	15	4	4	44380	Uncharacterized protein OS=Apis mellifera OX=7460 GN=727106 PE=4 SV=1
A0A088ALH1	154.94	15	5	5	58421	Uncharacterized protein OS=Apis mellifera OX=7460 GN=LOC726679 PE=4 SV=1
A0A088AFE2	152.38	15	4	4	56555	Uncharacterized protein OS=Apis mellifera OX=7460 GN=LOC724160 PE=4 SV=1
A0A088AV56	151.54	15	5	5	38810	Uncharacterized protein OS=Apis mellifera OX=7460 GN=LOC724919 PE=4 SV=1
A0A088A9V0	146.44	15	10	10	126238	Anoctamin OS=Apis mellifera OX=7460 GN=LOC408908 PE=3 SV=1
A0A088A7A0	146.34	15	4	4	42647	Uncharacterized protein OS=Apis mellifera OX=7460 PE=4 SV=1
A0A088AV92	146.16	15	5	5	58670	Uncharacterized protein OS=Apis mellifera OX=7460 PE=4 SV=1
A0A088A122	143.94	15	6	6	67929	Uncharacterized protein OS=Apis mellifera OX=7460 GN=Madm PE=4 SV=1
A0A088AFW7	141	15	10	10	97617	Uncharacterized protein OS=Apis mellifera OX=7460 PE=4 SV=1
A0A088AA34	139.95	15	4	4	47632	Uncharacterized protein OS=Apis mellifera OX=7460 GN=Pdk PE=4 SV=1
A0A088AJN6	139.35	15	7	7	76917	Beta-glucuronidase OS=Apis mellifera OX=7460 GN=LOC409814 PE=3 SV=1
A0A088A9W4	132.5	15	4	3	34750	Uncharacterized protein OS=Apis mellifera OX=7460 GN=Flo1 PE=3 SV=1
A0A088AMV1	129.41	15	6	6	69795	Uncharacterized protein OS=Apis mellifera OX=7460 PE=3 SV=1
A0A088AH97	126.56	15	4	4	42591	Uncharacterized protein OS=Apis mellifera OX=7460 PE=3 SV=1
A0A088A861	125.72	15	3	3	27404	Eukaryotic translation initiation factor 3 subunit J OS=Apis mellifera OX=7460 GN=Adam PE=3 SV=1
A0A087ZQ29	125.3	15	4	4	61418	Uncharacterized protein OS=Apis mellifera OX=7460 PE=4 SV=1
A0A088AJE9	119.33	15	4	4	40391	Uncharacterized protein OS=Apis mellifera OX=7460 PE=4 SV=1
A0A087ZQM2	118.08	15	2	2	22832	Uncharacterized protein OS=Apis mellifera OX=7460 PE=4 SV=1
A0A088ASZ6	115.89	15	3	3	20464	Transgelin OS=Apis mellifera OX=7460 GN=Mp20 PE=3 SV=1
A0A088AL04	114.2	15	4	4	47270	Uncharacterized protein OS=Apis mellifera OX=7460 GN=ade5 PE=3 SV=1
T1SG87	113.74	15	4	4	52478	Calcium channel beta subunit variant b OS=Apis mellifera OX=7460 GN=Ca-beta PE=2 SV=1
A0A087ZST6	112.86	15	5	5	47846	Uncharacterized protein OS=Apis mellifera OX=7460 GN=LOC413724 PE=4 SV=1
A0A088ACY5	112.81	15	5	5	51359	Tubulin gamma chain OS=Apis mellifera OX=7460 GN=TUBG1 PE=3 SV=1
A0A088ATX9	112.21	15	4	4	62439	Uncharacterized protein OS=Apis mellifera OX=7460 PE=4 SV=1
A0A088AIR9	110.66	15	6	6	67945	CTP synthase OS=Apis mellifera OX=7460 GN=LOC551835 PE=3 SV=1
A0A088A4Z7	109.73	15	3	3	27746	Uncharacterized protein OS=Apis mellifera OX=7460 GN=LOC409847 PE=3 SV=1
A0A087ZX19	108.69	15	3	3	34396	Uncharacterized protein OS=Apis mellifera OX=7460 GN=100578624 PE=3 SV=1
A0A088AW89	108.25	15	3	3	44656	Mitogen-activated protein kinase OS=Apis mellifera OX=7460 GN=bsk PE=4 SV=1
A0A088A549	105.47	15	2	2	36627	Eukaryotic translation initiation factor 3 subunit I OS=Apis mellifera OX=7460 GN=Trip1 PE=3 SV=1
A0A088A590	104.64	15	3	3	34433	Uncharacterized protein OS=Apis mellifera OX=7460 PE=3 SV=1
A0A088A8V8	102.78	15	2	2	28100	Uncharacterized protein OS=Apis mellifera OX=7460 GN=LOC409066 PE=3 SV=1
A0A088AJK1	101.02	15	3	3	26606	Uncharacterized protein OS=Apis mellifera OX=7460 GN=RpL23A PE=3 SV=1
A0A087ZSM0	100.7	15	2	2	21735	Uncharacterized protein OS=Apis mellifera OX=7460 GN=102656215 PE=4 SV=1
A0A088A4B3	99.14	15	3	3	33470	Uncharacterized protein OS=Apis mellifera OX=7460 GN=Ufd1-like PE=4 SV=1
A0A088A086	94.87	15	1	1	11829	Uncharacterized protein OS=Apis mellifera OX=7460 GN=LOC725797 PE=4 SV=1
A0A0B4J2M4	94.04	15	3	3	44505	N-acetylglucosamine-6-phosphate deacetylase OS=Apis mellifera OX=7460 PE=3 SV=1
A0A088AAC3	89.75	15	2	2	27202	Uncharacterized protein OS=Apis mellifera OX=7460 GN=100576193 PE=4 SV=1
A0A088AA04	89.01	15	2	2	24528	Uncharacterized protein OS=Apis mellifera OX=7460 GN=LOC410103 PE=4 SV=1
A0A088AET8	87.45	15	2	2	31779	Tetraspanin OS=Apis mellifera OX=7460 GN=102654084 PE=3 SV=1
A0A088AHE9	85.35	15	3	3	34987	Uncharacterized protein OS=Apis mellifera OX=7460 PE=4 SV=1
A0A088ABW2	81.95	15	1	1	20085	Uncharacterized protein OS=Apis mellifera OX=7460 PE=4 SV=1
A0A087ZWI1	78.5	15	2	2	19991	Uncharacterized protein OS=Apis mellifera OX=7460 GN=Dctn5 PE=4 SV=1
A0A088A4T3	74.29	15	1	1	15183	Structural cuticle protein OS=Apis mellifera OX=7460 GN=CPR14 PE=4 SV=1
A0A088A3L6	69.67	15	2	2	16824	Uncharacterized protein OS=Apis mellifera OX=7460 PE=4 SV=1
I1Z8F6	68.94	15	2	2	27159	Transformer 2 transcript variant 233 OS=Apis mellifera OX=7460 GN=tra2 PE=2 SV=1
I1Z8F3	68.94	15	2	2	27246	Transformer 2 transcript variant 234 OS=Apis mellifera OX=7460 GN=tra2 PE=2 SV=1
A0A088ATD5	64.82	15	2	2	20702	Uncharacterized protein OS=Apis mellifera OX=7460 GN=725736 PE=4 SV=1
A0A087ZPP1	64.41	15	2	2	23046	Uncharacterized protein OS=Apis mellifera OX=7460 GN=LOC410034 PE=3 SV=1
A0A088AUX1	59.5	15	1	1	17683	Uncharacterized protein OS=Apis mellifera OX=7460 GN=LOC408648 PE=4 SV=1
A0A087ZWB9	56.28	15	1	1	8064	Uncharacterized protein OS=Apis mellifera OX=7460 PE=4 SV=1
A0A088AW00	54.33	15	2	2	20393	Uncharacterized protein OS=Apis mellifera OX=7460 PE=4 SV=1
A0A088AJM5	54.13	15	1	1	26324	Tetraspanin OS=Apis mellifera OX=7460 GN=Tspan17 PE=3 SV=1
A0A088A5R1	50.25	15	1	1	16118	Uncharacterized protein OS=Apis mellifera OX=7460 PE=4 SV=1
A0A088A078	48.33	15	2	2	19706	Uncharacterized protein OS=Apis mellifera OX=7460 GN=107964437 PE=4 SV=1
A0A088A525	47.26	15	1	1	19084	Uncharacterized protein OS=Apis mellifera OX=7460 GN=mRpS12 PE=3 SV=1
A0A088ACR0	302.65	16	7	7	65538	Uncharacterized protein OS=Apis mellifera OX=7460 PE=3 SV=1
A0A087ZZX4	239.68	16	5	5	49825	Galectin OS=Apis mellifera OX=7460 GN=galectin1 PE=4 SV=1
A0A087ZSB5	234.72	16	10	10	125064	Uncharacterized protein OS=Apis mellifera OX=7460 GN=LOC408497 PE=4 SV=1
A0A088AJQ9	233.48	16	11	11	128858	Uncharacterized protein OS=Apis mellifera OX=7460 PE=3 SV=1
A0A088AB18	209.36	16	6	6	58968	Uncharacterized protein OS=Apis mellifera OX=7460 PE=4 SV=1
A0A087ZYC0	202.81	16	11	11	110349	Uncharacterized protein OS=Apis mellifera OX=7460 GN=LOC727408 PE=4 SV=1
A0A088AMT8	200.37	16	11	11	133394	Uncharacterized protein OS=Apis mellifera OX=7460 PE=4 SV=1
A0A087ZSS8	197	16	12	12	109137	Uncharacterized protein OS=Apis mellifera OX=7460 GN=LOC413912 PE=4 SV=1
A0A088A0Z9	192.1	16	9	9	106588	Uncharacterized protein OS=Apis mellifera OX=7460 GN=LOC550984 PE=4 SV=1
A0A088ARI3	189.41	16	7	7	68985	Uncharacterized protein OS=Apis mellifera OX=7460 GN=LOC550885 PE=4 SV=1
A0A088ALL3	177.3	16	3	3	36183	Uncharacterized protein OS=Apis mellifera OX=7460 GN=LOC726793 PE=4 SV=1
A0A088AQX9	175.46	16	8	8	58625	Serine hydroxymethyltransferase OS=Apis mellifera OX=7460 GN=LOC411796 PE=3 SV=1
A0A087ZW90	167.91	16	10	10	87554	Uncharacterized protein OS=Apis mellifera OX=7460 GN=LOC412154 PE=3 SV=1
A0A087ZV47	165.6	16	5	5	47050	Uncharacterized protein OS=Apis mellifera OX=7460 GN=LOC726213 PE=4 SV=1
A0A088A8G9	160.68	16	4	4	46508	Uncharacterized protein OS=Apis mellifera OX=7460 PE=4 SV=1
A0A088A084	160.36	16	7	7	81280	AMP deaminase OS=Apis mellifera OX=7460 GN=LOC409444 PE=3 SV=1
A0A088AL38	159.63	16	8	8	82403	Enolase-phosphatase E1 OS=Apis mellifera OX=7460 PE=3 SV=1
A0A088ARI0	158.34	16	7	7	85713	Uncharacterized protein OS=Apis mellifera OX=7460 PE=4 SV=1
A0A087ZVE8	156.67	16	7	7	51990	Epoxide hydrolase OS=Apis mellifera OX=7460 GN=LOC406152 PE=3 SV=1
A0A088AJC4	150.46	16	8	8	65351	Uncharacterized protein OS=Apis mellifera OX=7460 GN=Pgm2 PE=3 SV=1
A0A088AQR5	149.81	16	4	4	36408	Uncharacterized protein OS=Apis mellifera OX=7460 PE=4 SV=1
A0A087ZRG8	149.74	16	6	6	55107	V-type proton ATPase subunit a OS=Apis mellifera OX=7460 PE=3 SV=1
A0A088AVC4	149.23	16	3	3	26730	Uncharacterized protein OS=Apis mellifera OX=7460 GN=LOC551768 PE=4 SV=1
A0A088ALP8	137.47	16	4	4	50711	Uncharacterized protein OS=Apis mellifera OX=7460 GN=LOC409092 PE=4 SV=1
A0A087ZZP4	135.89	16	4	3	36762	Uncharacterized protein OS=Apis mellifera OX=7460 GN=LOC412442 PE=3 SV=1
A0A087ZX99	133.7	16	5	5	40316	Uncharacterized protein OS=Apis mellifera OX=7460 PE=4 SV=1
A0A088APF8	133.26	16	4	4	43564	Uncharacterized protein OS=Apis mellifera OX=7460 GN=LOC550655 PE=4 SV=1
A0A088AW48	127.84	16	3	3	29129	Proliferating cell nuclear antigen OS=Apis mellifera OX=7460 GN=mus209 PE=3 SV=1
A0A088AUD0	125.03	16	3	3	38050	Uncharacterized protein OS=Apis mellifera OX=7460 PE=4 SV=1
A0A088AV14	123.36	16	4	4	44609	Uncharacterized protein OS=Apis mellifera OX=7460 GN=Arc42 PE=3 SV=1
A0A088AMI1	121.64	16	3	3	22413	Uncharacterized protein OS=Apis mellifera OX=7460 GN=LOC724487 PE=4 SV=1
A0A087ZZ05	118.09	16	3	3	23885	Ribosomal protein L15 OS=Apis mellifera OX=7460 GN=RpL15 PE=3 SV=1
A0A088ANQ0	117.97	16	5	5	44202	Uncharacterized protein OS=Apis mellifera OX=7460 GN=dock PE=4 SV=1
A0A088AFM0	116.23	16	4	4	36489	Uncharacterized protein OS=Apis mellifera OX=7460 PE=4 SV=1
A0A088A2E5	114.56	16	3	3	31249	Uncharacterized protein OS=Apis mellifera OX=7460 GN=LOC412366 PE=4 SV=1
A0A088AHX9	114.3	16	4	4	41713	Uncharacterized protein OS=Apis mellifera OX=7460 GN=102656107 PE=4 SV=1
A0A088AH98	111.32	16	3	3	34660	Uncharacterized protein OS=Apis mellifera OX=7460 GN=LOC412388 PE=4 SV=1
A0A088AHD2	108.55	16	1	1	16564	Protein quiver OS=Apis mellifera OX=7460 GN=LOC726268 PE=3 SV=1
A0A088AIL2	106.56	16	3	3	16740	Uncharacterized protein OS=Apis mellifera OX=7460 GN=RpL27A PE=3 SV=1
A0A087ZWA0	104.47	16	6	6	60809	Non-specific serine/threonine protein kinase OS=Apis mellifera OX=7460 GN=Akt1 PE=4 SV=1
A0A088AAI1	103.23	16	2	2	21091	Calcium load-activated calcium channel OS=Apis mellifera OX=7460 GN=LOC552501 PE=3 SV=1
A0A088ADL4	99.88	16	3	3	52725	Uncharacterized protein OS=Apis mellifera OX=7460 PE=4 SV=1
A0A087ZZ10	98.83	16	3	3	33620	Uncharacterized protein OS=Apis mellifera OX=7460 GN=eIF2B-alpha PE=3 SV=1
A0A088AH64	98.42	16	2	2	22975	Uncharacterized protein OS=Apis mellifera OX=7460 PE=4 SV=1
A0A088AVQ1	97.12	16	3	3	30713	Uncharacterized protein OS=Apis mellifera OX=7460 GN=LOC410943 PE=4 SV=1
A0A088AC67	96.26	16	4	4	22520	Uncharacterized protein OS=Apis mellifera OX=7460 GN=RpS9 PE=3 SV=1
A0A088AK13	95.35	16	3	3	24765	Uncharacterized protein OS=Apis mellifera OX=7460 GN=LOC413394 PE=3 SV=1
A0A087ZR08	95.04	16	1	1	11261	Uncharacterized protein OS=Apis mellifera OX=7460 PE=4 SV=1
A0A088ASN8	94.55	16	2	2	24632	Uncharacterized protein OS=Apis mellifera OX=7460 GN=Sgt1 PE=4 SV=1
A0A087ZZX6	92.19	16	3	3	28309	Uncharacterized protein OS=Apis mellifera OX=7460 GN=725363 PE=4 SV=1
A0A0B4J2N7	87.18	16	4	4	38702	Uncharacterized protein OS=Apis mellifera OX=7460 GN=CSN5 PE=4 SV=1
A0A087ZY76	84.46	16	2	2	26633	Uncharacterized protein OS=Apis mellifera OX=7460 GN=LOC409454 PE=4 SV=1
B7UUK1	81.64	16	2	2	19058	Phospholipase A2 OS=Apis mellifera OX=7460 GN=pla2 PE=2 SV=1
I1VC86	81.64	16	2	2	19028	Phospholipase A2 OS=Apis mellifera OX=7460 PE=2 SV=1
P00630	81.64	16	2	2	19058	Phospholipase A2 OS=Apis mellifera OX=7460 PE=1 SV=3
A5A5E4	74.29	16	1	1	14562	Structural cuticle protein (Fragment) OS=Apis mellifera OX=7460 PE=2 SV=1
A0A087ZP05	73.96	16	2	2	26344	Uncharacterized protein OS=Apis mellifera OX=7460 GN=LOC413253 PE=4 SV=1
A0A088A199	69.28	16	1	1	14573	Uncharacterized protein OS=Apis mellifera OX=7460 GN=LOC408308 PE=4 SV=1
A0A088A001	62.44	16	3	3	28253	Uncharacterized protein OS=Apis mellifera OX=7460 GN=LOC726139 PE=4 SV=1
A0A087ZMZ7	58.66	16	1	1	7959	Uncharacterized protein OS=Apis mellifera OX=7460 GN=100578023 PE=4 SV=1
A0A087ZTN7	57.26	16	1	1	9230	Uncharacterized protein OS=Apis mellifera OX=7460 PE=4 SV=1
A0A088AGW5	49.78	16	2	2	17642	Uncharacterized protein OS=Apis mellifera OX=7460 GN=LOC726085 PE=4 SV=1
A0A088ANG4	46.39	16	1	1	15890	Uncharacterized protein OS=Apis mellifera OX=7460 PE=4 SV=1
A0A088A6R7	40.26	16	1	1	15208	Uncharacterized protein OS=Apis mellifera OX=7460 PE=4 SV=1
U3KR65	36.54	16	1	1	13920	Uncharacterized protein OS=Apis mellifera OX=7460 GN=551816 PE=4 SV=1
A0A088ASN7	324.67	17	24	24	192370	Uncharacterized protein OS=Apis mellifera OX=7460 PE=4 SV=1
A0A088A279	313.4	17	23	23	219712	Uncharacterized protein OS=Apis mellifera OX=7460 PE=4 SV=1
A0A088AEI6	281.7	17	20	20	218063	Uncharacterized protein OS=Apis mellifera OX=7460 PE=4 SV=1
A0A087ZNW1	238.52	17	13	13	146215	Uncharacterized protein OS=Apis mellifera OX=7460 PE=4 SV=1
A0A088AEI3	231.13	17	11	11	98294	Uncharacterized protein OS=Apis mellifera OX=7460 GN=Mtp PE=4 SV=1
A0A088AN33	228.04	17	7	7	65619	Uncharacterized protein OS=Apis mellifera OX=7460 GN=SCR-B6 PE=3 SV=1
A0A087ZVG6	226.29	17	9	9	77682	Uncharacterized protein OS=Apis mellifera OX=7460 GN=726030 PE=4 SV=1
A0A088A722	225.07	17	4	4	48466	Uncharacterized protein OS=Apis mellifera OX=7460 PE=4 SV=1
A0A088AC80	219.86	17	9	9	81550	Eukaryotic translation initiation factor 3 subunit B OS=Apis mellifera OX=7460 GN=eIF3-S9 PE=3 SV=1
A0A088ADD3	204.08	17	8	8	68416	Uncharacterized protein OS=Apis mellifera OX=7460 PE=4 SV=1
A0A088ABF5	202.14	17	7	7	62294	Uncharacterized protein OS=Apis mellifera OX=7460 GN=LOC410189 PE=4 SV=1
A0A088AR30	200.71	17	10	10	101744	Uncharacterized protein OS=Apis mellifera OX=7460 PE=3 SV=1
A0A087ZTD1	191.97	17	6	6	63116	Uncharacterized protein OS=Apis mellifera OX=7460 PE=4 SV=1
A0A087ZP36	189.75	17	5	5	55929	Uncharacterized protein OS=Apis mellifera OX=7460 GN=LOC725967 PE=4 SV=1
A0A088A5E3	184.57	17	4	4	42566	Uncharacterized protein OS=Apis mellifera OX=7460 GN=Vps26 PE=4 SV=1
A0A087ZUG7	182.94	17	10	10	96476	V-type proton ATPase subunit a OS=Apis mellifera OX=7460 PE=3 SV=1
A0A087ZUP4	179.24	17	6	6	65899	Serine/threonine protein phosphatase 2A regulatory subunit OS=Apis mellifera OX=7460 GN=LOC408949 PE=3 SV=1
A0A087ZRD2	172.68	17	5	5	44138	Uncharacterized protein OS=Apis mellifera OX=7460 PE=3 SV=1
A0A087ZPN7	134.36	17	4	4	32885	Uncharacterized protein OS=Apis mellifera OX=7460 PE=4 SV=1
A0A087ZV99	134.33	17	5	5	46654	Uncharacterized protein OS=Apis mellifera OX=7460 GN=LOC551972 PE=4 SV=1
O77249	133.52	17	4	4	41627	GABA receptor Rdl subunit (Fragment) OS=Apis mellifera OX=7460 PE=2 SV=1
A0A088ANX1	129.31	17	8	8	62385	Aldehyde dehydrogenase OS=Apis mellifera OX=7460 PE=3 SV=1
A0A088AST4	124.62	17	3	3	28007	Uncharacterized protein OS=Apis mellifera OX=7460 PE=4 SV=1
A0A087ZVR2	124.02	17	3	1	22918	Uncharacterized protein OS=Apis mellifera OX=7460 GN=Rab10 PE=4 SV=1
A0A088AEC7	117.49	17	4	4	37744	Uncharacterized protein OS=Apis mellifera OX=7460 GN=Aos1 PE=4 SV=1
A0A088A4N3	112.95	17	3	3	36188	Eukaryotic translation initiation factor 3 subunit H OS=Apis mellifera OX=7460 PE=3 SV=1
A0A087ZZH5	109.59	17	3	3	29508	Uncharacterized protein OS=Apis mellifera OX=7460 PE=4 SV=1
A0A088ARA9	106.52	17	4	4	25303	60S ribosomal protein L13 OS=Apis mellifera OX=7460 GN=RpL13 PE=3 SV=1
A0A088A8H4	101.63	17	2	2	21243	Uncharacterized protein OS=Apis mellifera OX=7460 GN=LOC727019 PE=4 SV=1
A0A088AU60	96.14	17	5	5	52285	Uncharacterized protein OS=Apis mellifera OX=7460 GN=snRNP70K PE=4 SV=1
A0A088A0N3	93.83	17	3	3	20538	Uncharacterized protein OS=Apis mellifera OX=7460 GN=LOC412201 PE=4 SV=1
A0A088A9M8	86.75	17	4	4	45737	Uncharacterized protein OS=Apis mellifera OX=7460 GN=lobe PE=4 SV=1
A0A088A1C5	79.74	17	4	4	35609	Uncharacterized protein OS=Apis mellifera OX=7460 GN=408361 PE=4 SV=1
A0A087ZMS5	79.71	17	1	1	12526	Small nuclear ribonucleoprotein Sm D2 OS=Apis mellifera OX=7460 PE=3 SV=1
A0A088AF14	76.3	17	4	4	43437	Dihydroorotate dehydrogenase (quinone) mitochondrial OS=Apis mellifera OX=7460 GN=100577081 PE=3 SV=1
A0A088A5E0	73	17	1	1	10976	Uncharacterized protein OS=Apis mellifera OX=7460 GN=102656491 PE=4 SV=1
A0A088AKR9	61.42	17	1	1	14979	Uncharacterized protein OS=Apis mellifera OX=7460 PE=4 SV=1
A0A088AGP9	60.04	17	2	2	21431	Inosine triphosphate pyrophosphatase OS=Apis mellifera OX=7460 GN=LOC726205 PE=3 SV=1
A0A088AKM8	53.82	17	2	2	24923	Uncharacterized protein OS=Apis mellifera OX=7460 GN=Tpx-5 PE=4 SV=1
A0A0B4J2P3	50.62	17	2	2	13381	60S ribosomal protein L36 OS=Apis mellifera OX=7460 GN=RpL36 PE=3 SV=1
A0A088AN50	46.44	17	1	1	13823	Uncharacterized protein OS=Apis mellifera OX=7460 GN=Ssb-c31a PE=4 SV=1
A0A088AC05	36.61	17	1	1	12935	Uncharacterized protein OS=Apis mellifera OX=7460 GN=LOC551318 PE=4 SV=1
A0A087ZWQ4	303.9	18	8	8	47354	Uncharacterized protein OS=Apis mellifera OX=7460 PE=4 SV=1
A0A087ZQ26	271.44	18	16	16	183993	Uncharacterized protein OS=Apis mellifera OX=7460 PE=4 SV=1
A0A088AGS1	253.75	18	10	10	117836	Uncharacterized protein OS=Apis mellifera OX=7460 PE=4 SV=1
I4EC01	251.42	18	15	15	146635	Adenylyl cyclase OS=Apis mellifera OX=7460 GN=ac8 PE=2 SV=1
A0A088ASD7	251.42	18	15	15	145808	Uncharacterized protein OS=Apis mellifera OX=7460 PE=3 SV=1
A0A088A6G0	243.98	18	14	14	116406	Oxysterol-binding protein OS=Apis mellifera OX=7460 PE=3 SV=1
A0A088ADP4	241.81	18	7	7	63040	Uncharacterized protein OS=Apis mellifera OX=7460 PE=4 SV=1
A0A088A9Y9	239.65	18	23	23	205671	Uncharacterized protein OS=Apis mellifera OX=7460 PE=4 SV=1
A0A088A8E1	237.46	18	7	7	67159	Uncharacterized protein OS=Apis mellifera OX=7460 PE=4 SV=1
A0A087ZUT4	237.18	18	6	6	54273	Uncharacterized protein OS=Apis mellifera OX=7460 GN=409006 PE=4 SV=1
A0A088A891	224.47	18	19	19	180390	Uncharacterized protein OS=Apis mellifera OX=7460 PE=3 SV=1
A0A088AGS8	223.07	18	20	20	183217	Uncharacterized protein OS=Apis mellifera OX=7460 PE=3 SV=1
A0A088AF89	222.59	18	11	11	102513	Uncharacterized protein OS=Apis mellifera OX=7460 GN=alpha-Cat PE=4 SV=1
A0A088APX8	216.62	18	15	15	142419	Uncharacterized protein OS=Apis mellifera OX=7460 PE=4 SV=1
A0A087ZSV6	215.88	18	8	8	57650	Uncharacterized protein OS=Apis mellifera OX=7460 GN=Drep-2 PE=4 SV=1
A0A087ZWB0	213.39	18	12	12	113108	Uncharacterized protein OS=Apis mellifera OX=7460 GN=LOC413427 PE=4 SV=1
A0A088A1B6	208.79	18	6	6	47977	Adenosylhomocysteinase OS=Apis mellifera OX=7460 GN=LOC408368 PE=3 SV=1
A0A087ZZH1	205.35	18	14	14	141398	Uncharacterized protein OS=Apis mellifera OX=7460 PE=4 SV=1
A0A087ZSA8	203.33	18	8	8	88160	Uncharacterized protein OS=Apis mellifera OX=7460 GN=LOC410570 PE=4 SV=1
A0A088A9Z3	201.28	18	5	5	43203	Uncharacterized protein OS=Apis mellifera OX=7460 GN=LOC413299 PE=4 SV=1
Q3B715	198.83	18	7	7	48206	Troponin T isoform 2 OS=Apis mellifera OX=7460 GN=TpnT PE=4 SV=1
Q3B711	198.83	18	7	7	49144	Troponin T isoform 1 OS=Apis mellifera OX=7460 GN=TpnT PE=4 SV=1
A0A088ALR1	197.12	18	6	6	41620	Uncharacterized protein OS=Apis mellifera OX=7460 GN=726199 PE=4 SV=1
A0A087ZX31	187.72	18	4	4	13299	Uncharacterized protein OS=Apis mellifera OX=7460 GN=LOC551596 PE=4 SV=1
A0A088AM57	179.16	18	7	7	63803	Uncharacterized protein OS=Apis mellifera OX=7460 PE=4 SV=1
A0A088ADG2	174.47	18	6	6	55839	O-phosphoseryl-tRNA(Sec) selenium transferase OS=Apis mellifera OX=7460 GN=LOC552745 PE=3 SV=1
A0A088AEI7	173.81	18	6	6	53352	Uncharacterized protein OS=Apis mellifera OX=7460 PE=4 SV=1
A0A088AVQ8	172.33	18	6	6	56189	tRNA-splicing ligase RtcB homolog OS=Apis mellifera OX=7460 GN=LOC409653 PE=3 SV=1
A0A088ABT8	170.02	18	9	9	92849	Uncharacterized protein OS=Apis mellifera OX=7460 GN=LOC725093 PE=4 SV=1
A0A088A0L8	169.21	18	9	9	89335	Uncharacterized protein OS=Apis mellifera OX=7460 PE=4 SV=1
A0A087ZVW2	153.03	18	2	2	18658	Uncharacterized protein OS=Apis mellifera OX=7460 GN=LOC551126 PE=4 SV=1
A0A088AJ70	152.55	18	5	5	45482	Mitochondrial import inner membrane translocase subunit TIM50 OS=Apis mellifera OX=7460 GN=LOC408569 PE=3 SV=1
A0A088AH15	151.99	18	3	3	24224	Uncharacterized protein OS=Apis mellifera OX=7460 PE=4 SV=1
A0A087ZWD6	151.97	18	4	4	22908	Uncharacterized protein OS=Apis mellifera OX=7460 GN=102656587 PE=4 SV=1
A0A088AL31	150.64	18	8	5	84588	Uncharacterized protein OS=Apis mellifera OX=7460 PE=4 SV=1
A0A088A344	149.36	18	6	6	70393	Uncharacterized protein OS=Apis mellifera OX=7460 PE=4 SV=1
A0A088A1M4	148.09	18	6	6	72410	Transmembrane 9 superfamily member OS=Apis mellifera OX=7460 GN=LOC552723 PE=3 SV=1
A0A088ABI0	146.27	18	5	5	48516	Uncharacterized protein OS=Apis mellifera OX=7460 GN=LOC551682 PE=4 SV=1
A0A088AUL3	145.87	18	3	3	35907	Uncharacterized protein OS=Apis mellifera OX=7460 GN=Pvf1 PE=3 SV=1
A0A088A2C1	144.8	18	2	2	18480	Uncharacterized protein OS=Apis mellifera OX=7460 PE=4 SV=1
A0A088A0F7	139.32	18	2	2	24407	Uncharacterized protein OS=Apis mellifera OX=7460 GN=LOC552659 PE=4 SV=1
A0A088A7M1	138.32	18	4	1	22997	Uncharacterized protein OS=Apis mellifera OX=7460 GN=100577870 PE=4 SV=1
A0A088A8Z5	129.5	18	3	3	30667	Uncharacterized protein OS=Apis mellifera OX=7460 GN=LOC725744 PE=4 SV=1
A0A087ZQN7	122.49	18	6	5	57784	Tyrosine-protein kinase OS=Apis mellifera OX=7460 GN=LOC412588 PE=3 SV=1
A0A087ZMS7	118.02	18	3	2	24675	Uncharacterized protein OS=Apis mellifera OX=7460 GN=Rab39 PE=4 SV=1
A0A088AH78	117.51	18	5	5	45977	Uncharacterized protein OS=Apis mellifera OX=7460 GN=Vps36 PE=4 SV=1
A0A088A0K9	111.82	18	5	5	56894	Uncharacterized protein OS=Apis mellifera OX=7460 GN=100577140 PE=4 SV=1
A0A088AQM6	109.85	18	3	3	27410	Uncharacterized protein OS=Apis mellifera OX=7460 GN=LOC724118 PE=4 SV=1
A0A087ZWY9	108.67	18	4	4	37216	Uncharacterized protein OS=Apis mellifera OX=7460 PE=4 SV=1
A0A087ZNQ4	98.3	18	3	3	43627	Uncharacterized protein OS=Apis mellifera OX=7460 PE=4 SV=1
A0A088AT40	95.41	18	3	3	23798	Uncharacterized protein OS=Apis mellifera OX=7460 PE=4 SV=1
A0A087ZSF3	94.91	18	3	3	27032	Uncharacterized protein OS=Apis mellifera OX=7460 PE=4 SV=1
Q3B706	93.82	18	2	2	24365	Troponin I isoform 6b2 OS=Apis mellifera OX=7460 GN=TpnI PE=4 SV=1
A0A087ZZ11	92.48	18	1	1	9755	Uncharacterized protein OS=Apis mellifera OX=7460 GN=LOC552809 PE=4 SV=1
A0A087ZWE7	90.89	18	1	1	8223	Uncharacterized protein OS=Apis mellifera OX=7460 PE=4 SV=1
A0A088A8G8	90.36	18	5	5	55959	Uncharacterized protein OS=Apis mellifera OX=7460 PE=4 SV=1
A0A088A168	87.02	18	3	3	19713	Actin-related protein 2/3 complex subunit 4 OS=Apis mellifera OX=7460 GN=Arpc4 PE=3 SV=1
A0A088APZ4	84.1	18	2	2	20703	Density-regulated protein OS=Apis mellifera OX=7460 GN=LOC552539 PE=3 SV=1
A0A088A5S2	84.08	18	3	3	37854	Uncharacterized protein OS=Apis mellifera OX=7460 PE=4 SV=1
A0A088A2J7	83.17	18	2	2	25681	Protein YIPF OS=Apis mellifera OX=7460 GN=LOC413898 PE=3 SV=1
A0A087ZS41	80.57	18	2	2	20050	Uncharacterized protein OS=Apis mellifera OX=7460 GN=100577362 PE=4 SV=1
A0A087ZRP7	79.91	18	3	3	32032	Uncharacterized protein OS=Apis mellifera OX=7460 PE=4 SV=1
A0A088AUA2	79.59	18	1	1	16334	Uncharacterized protein OS=Apis mellifera OX=7460 PE=4 SV=1
A0A088A243	77.84	18	1	1	12046	Uncharacterized protein OS=Apis mellifera OX=7460 PE=4 SV=1
A0A088ANR4	77.51	18	3	3	41300	Uncharacterized protein OS=Apis mellifera OX=7460 GN=mRpL3 PE=4 SV=1
A0A088AMB7	75.96	18	1	1	21047	Uncharacterized protein OS=Apis mellifera OX=7460 PE=4 SV=1
A0A088AN62	73.65	18	1	1	7500	Uncharacterized protein OS=Apis mellifera OX=7460 GN=LOC724629 PE=3 SV=1
A0A088ADM7	73.65	18	1	1	7386	Uncharacterized protein OS=Apis mellifera OX=7460 GN=LOC724531 PE=3 SV=1
A0A088A3X3	72.13	18	3	3	28355	Uncharacterized protein OS=Apis mellifera OX=7460 PE=4 SV=1
A0A088AR49	66.21	18	2	2	21857	Uncharacterized protein OS=Apis mellifera OX=7460 PE=4 SV=1
A0A088AC82	62.57	18	1	1	9203	Uncharacterized protein OS=Apis mellifera OX=7460 PE=4 SV=1
A0A088AEN8	55.65	18	1	1	14488	Uncharacterized protein OS=Apis mellifera OX=7460 PE=4 SV=1
A0A088ADT0	49.94	18	2	2	27852	Uncharacterized protein OS=Apis mellifera OX=7460 PE=4 SV=1
A0A088ATW9	46.92	18	1	1	6941	Uncharacterized protein OS=Apis mellifera OX=7460 GN=100302106 PE=4 SV=1
A0A088AK93	29.07	18	1	1	17786	Uncharacterized protein OS=Apis mellifera OX=7460 GN=LOC726782 PE=4 SV=1
A0A088A8P5	27.58	18	1	1	8695	Uncharacterized protein OS=Apis mellifera OX=7460 PE=4 SV=1
A0A088A0C5	280.07	19	16	16	142338	Uncharacterized protein OS=Apis mellifera OX=7460 GN=LOC408841 PE=4 SV=1
A0A088A0K0	228.38	19	6	6	43895	Uncharacterized protein OS=Apis mellifera OX=7460 PE=4 SV=1
A0A088AT22	228.22	19	16	16	136761	Uncharacterized protein OS=Apis mellifera OX=7460 GN=LOC412282 PE=3 SV=1
A0A087ZVD3	227.11	19	10	10	104536	Calcium-transporting ATPase OS=Apis mellifera OX=7460 GN=LOC724440 PE=3 SV=1
A0A088AI17	225.23	19	3	3	17522	Uncharacterized protein OS=Apis mellifera OX=7460 PE=4 SV=1
A0A088A647	221.64	19	10	10	84011	Ribosomal protein S6 kinase OS=Apis mellifera OX=7460 GN=S6kII PE=3 SV=1
A0A088AF62	205.48	19	6	6	44925	Uncharacterized protein OS=Apis mellifera OX=7460 GN=LOC725661 PE=4 SV=1
A0A088AH65	201.75	19	4	4	26726	Uncharacterized protein OS=Apis mellifera OX=7460 PE=4 SV=1
A0A088ATG4	200.52	19	8	8	63925	Uncharacterized protein OS=Apis mellifera OX=7460 GN=LOC726178 PE=4 SV=1
Q3B714	198.83	19	7	7	47578	Troponin T isoform 3 OS=Apis mellifera OX=7460 GN=TpnT PE=4 SV=1
A0A088ALH6	194.69	19	8	8	70760	Uncharacterized protein OS=Apis mellifera OX=7460 GN=Fim PE=4 SV=1
A0A088AGA9	191.81	19	7	7	39812	Uncharacterized protein OS=Apis mellifera OX=7460 PE=4 SV=1
A0A088A9Z4	191.63	19	11	11	108992	Uncharacterized protein OS=Apis mellifera OX=7460 PE=3 SV=1
A0A088AD05	189.01	19	6	6	44067	Fatty acyl-CoA reductase OS=Apis mellifera OX=7460 PE=3 SV=1
A0A087ZQD0	183.23	19	11	11	96853	Uncharacterized protein OS=Apis mellifera OX=7460 PE=3 SV=1
A0A087ZQC4	178.77	19	8	8	63822	Uncharacterized protein OS=Apis mellifera OX=7460 GN=TyHyd PE=4 SV=1
A0A088A023	176.93	19	11	11	90195	Uncharacterized protein OS=Apis mellifera OX=7460 GN=LOC412232 PE=4 SV=1
A0A087ZNU2	170	19	4	4	22760	Uncharacterized protein OS=Apis mellifera OX=7460 GN=Ykt6 PE=3 SV=1
A0A087ZN16	166.88	19	6	6	58568	Uncharacterized protein OS=Apis mellifera OX=7460 GN=LOC408433 PE=4 SV=1
A0A088AM37	165.54	19	7	7	79432	Uncharacterized protein OS=Apis mellifera OX=7460 GN=LOC411591 PE=4 SV=1
A0A088A730	151.63	19	4	4	29831	Uncharacterized protein OS=Apis mellifera OX=7460 PE=4 SV=1
A0A088AJX2	132.14	19	8	8	55233	Uncharacterized protein OS=Apis mellifera OX=7460 GN=100577002 PE=3 SV=1
A0A088AC74	127.22	19	3	3	17673	Uncharacterized protein OS=Apis mellifera OX=7460 PE=3 SV=1
A0A087ZTP9	123.52	19	8	8	58618	Adenosylhomocysteinase OS=Apis mellifera OX=7460 GN=LOC551762 PE=3 SV=1
A0A088ACJ9	121.94	19	3	3	23571	Protein RER1 OS=Apis mellifera OX=7460 GN=LOC410094 PE=3 SV=1
A0A088A8C3	114.99	19	2	2	19511	ER membrane protein complex subunit 4 OS=Apis mellifera OX=7460 GN=LOC412349 PE=3 SV=1
A0A088A0K6	110.85	19	3	3	31700	Uncharacterized protein OS=Apis mellifera OX=7460 GN=LOC408590 PE=4 SV=1
A0A087ZRG5	110.69	19	2	2	11497	Uncharacterized protein OS=Apis mellifera OX=7460 GN=726937 PE=4 SV=1
A0A087ZRX6	104.89	19	3	3	34080	Uncharacterized protein OS=Apis mellifera OX=7460 PE=4 SV=1
Q3LBA7	99.91	19	1	1	13844	Chemosensory protein 1 OS=Apis mellifera OX=7460 GN=CSP1 PE=2 SV=1
A0A088AFP5	98.48	19	2	2	13436	Uncharacterized protein OS=Apis mellifera OX=7460 GN=RpS25 PE=4 SV=1
A0A088ALW7	84.28	19	2	2	26930	Putative lipoyltransferase 2 mitochondrial OS=Apis mellifera OX=7460 GN=LOC726239 PE=3 SV=1
A0A088APZ0	65.55	19	1	1	13647	Uncharacterized protein OS=Apis mellifera OX=7460 GN=LOC551654 PE=4 SV=1
A0A088A1V5	60.89	19	2	2	18156	Uncharacterized protein OS=Apis mellifera OX=7460 GN=TpnCI PE=4 SV=1
A0A088A6U5	57.82	19	2	2	11946	U6 snRNA-associated Sm-like protein LSm3 OS=Apis mellifera OX=7460 GN=LOC725401 PE=3 SV=1
A0A087ZP89	52.57	19	2	2	22403	Uncharacterized protein OS=Apis mellifera OX=7460 GN=LOC413619 PE=4 SV=1
A0A088AEU7	38.09	19	1	1	8631	Uncharacterized protein OS=Apis mellifera OX=7460 PE=4 SV=1
A0A087ZVI4	346.76	20	40	40	254515	Uncharacterized protein OS=Apis mellifera OX=7460 PE=4 SV=1
A0A0B5EIM5	280.07	20	16	16	138770	Voltage dependent Ca2+ channel Cav alpha2delta1 subunit OS=Apis mellifera OX=7460 GN=Cava2d1 PE=2 SV=1
A0A087ZMX9	257.57	20	11	11	98895	Uncharacterized protein OS=Apis mellifera OX=7460 PE=4 SV=1
A0A088AM65	254.97	20	12	12	110067	Uncharacterized protein OS=Apis mellifera OX=7460 GN=LOC409139 PE=4 SV=1
A0A088AQ05	248.49	20	5	5	56535	Uncharacterized protein OS=Apis mellifera OX=7460 PE=4 SV=1
A0A088AL93	246.22	20	6	6	61523	Uncharacterized protein OS=Apis mellifera OX=7460 PE=4 SV=1
A0A088ASV7	243.3	20	10	10	88749	Uncharacterized protein OS=Apis mellifera OX=7460 GN=arm PE=4 SV=1
A0A087ZYP1	238.93	20	14	14	92302	Vacuolar protein sorting-associated protein 35 OS=Apis mellifera OX=7460 GN=Vps35 PE=3 SV=1
A0A087ZQ49	233.48	20	8	8	52168	CAAX prenyl protease OS=Apis mellifera OX=7460 GN=LOC551466 PE=3 SV=1
A0A087ZRD4	225.5	20	13	13	119897	Uncharacterized protein OS=Apis mellifera OX=7460 PE=4 SV=1
A0A088AB73	224.9	20	10	10	83870	Uncharacterized protein OS=Apis mellifera OX=7460 PE=4 SV=1
A0A088AMH9	224.05	20	8	8	56687	Uncharacterized protein OS=Apis mellifera OX=7460 GN=LOC409276 PE=4 SV=1
A0A087ZSR6	222.13	20	9	9	70632	Carboxylic ester hydrolase OS=Apis mellifera OX=7460 GN=AChE-2 PE=2 SV=1
Q4LEZ2	222.13	20	9	9	70680	Carboxylic ester hydrolase OS=Apis mellifera OX=7460 GN=AChE PE=2 SV=1
A0A088A4K3	218.17	20	12	12	98814	Uncharacterized protein OS=Apis mellifera OX=7460 GN=LOC409485 PE=3 SV=1
A0A088AT93	213.94	20	11	10	69357	Transporter OS=Apis mellifera OX=7460 GN=Gat-a PE=3 SV=1
A0A088ACI9	204.84	20	8	8	67593	Lysine--tRNA ligase OS=Apis mellifera OX=7460 GN=Aats-lys PE=3 SV=1
A0A088AID2	187.23	20	6	6	44622	Innexin OS=Apis mellifera OX=7460 GN=inx3 PE=3 SV=1
A0A088A1V1	180.78	20	9	9	87745	Uncharacterized protein OS=Apis mellifera OX=7460 GN=410263 PE=3 SV=1
A0A088AFJ2	180.4	20	5	5	43977	Uncharacterized protein OS=Apis mellifera OX=7460 GN=Pros54 PE=4 SV=1
Q1MU16	172.96	20	11	11	110856	Uncharacterized protein OS=Apis mellifera OX=7460 GN=Ac3 PE=2 SV=1
A0A088ARE4	167.33	20	9	9	74161	SUMO-activating enzyme subunit OS=Apis mellifera OX=7460 GN=Uba2 PE=3 SV=1
A0A087ZWN5	162.33	20	4	4	29328	Uncharacterized protein OS=Apis mellifera OX=7460 GN=LOC413280 PE=4 SV=1
A0A088A266	160.66	20	6	6	30370	Uncharacterized protein OS=Apis mellifera OX=7460 GN=RpL7A PE=4 SV=1
A0A088AFT2	159.78	20	5	5	28896	40S ribosomal protein S6 OS=Apis mellifera OX=7460 GN=LOC725647 PE=3 SV=1
A0A088A7S0	153.4	20	2	2	18832	Uncharacterized protein OS=Apis mellifera OX=7460 GN=102655896 PE=4 SV=1
A0A088AF99	151.53	20	6	6	70443	Uncharacterized protein OS=Apis mellifera OX=7460 GN=LOC410616 PE=3 SV=1
A0A088AP58	150.44	20	3	3	21747	Uncharacterized protein OS=Apis mellifera OX=7460 GN=elm PE=4 SV=1
A0A088ARL2	141.34	20	3	3	28438	Uncharacterized protein OS=Apis mellifera OX=7460 GN=U2A PE=4 SV=1
A0A087ZSJ2	140.96	20	4	4	34213	Uncharacterized protein OS=Apis mellifera OX=7460 PE=4 SV=1
A0A088AS52	140.93	20	5	5	34183	Uncharacterized protein OS=Apis mellifera OX=7460 GN=LOC411255 PE=4 SV=1
A0A087ZTL5	139.12	20	3	3	20780	Receptor expression-enhancing protein OS=Apis mellifera OX=7460 GN=LOC551678 PE=3 SV=1
A0A087ZQI2	119.5	20	3	3	39041	Uncharacterized protein OS=Apis mellifera OX=7460 GN=727263 PE=4 SV=1
A0A088ATI4	114.52	20	3	3	24860	Eukaryotic translation initiation factor 3 subunit K OS=Apis mellifera OX=7460 GN=LOC551960 PE=3 SV=1
A0A088AJZ2	111.81	20	4	4	35757	Ubiquitin carboxyl-terminal hydrolase OS=Apis mellifera OX=7460 GN=Uch-L3 PE=3 SV=1
A0A088ARZ9	105.33	20	2	2	20335	Uncharacterized protein OS=Apis mellifera OX=7460 GN=Rap2l PE=4 SV=1
A0A088ASZ3	104.01	20	3	3	14231	Uncharacterized protein OS=Apis mellifera OX=7460 GN=RpL31 PE=4 SV=1
A0A088AHM6	102.52	20	4	4	30024	Uncharacterized protein OS=Apis mellifera OX=7460 GN=LOC726364 PE=4 SV=1
A0A087ZWB2	94.01	20	3	3	23631	Proteasome subunit beta OS=Apis mellifera OX=7460 GN=LOC409978 PE=3 SV=1
A0A088AM69	93.18	20	2	2	15195	Thioredoxin OS=Apis mellifera OX=7460 GN=Trx-1 PE=3 SV=1
A0A087ZY14	92.31	20	2	2	16373	Uncharacterized protein OS=Apis mellifera OX=7460 PE=4 SV=1
A0A088A6Z7	90.07	20	2	2	17740	Uncharacterized protein OS=Apis mellifera OX=7460 GN=LOC551755 PE=4 SV=1
A0A087ZT47	88.95	20	2	2	28250	Uncharacterized protein OS=Apis mellifera OX=7460 PE=4 SV=1
A0A087ZU05	82.21	20	3	3	31796	Uncharacterized protein OS=Apis mellifera OX=7460 PE=4 SV=1
A0A087ZT06	81.37	20	2	2	16154	Cytidine deaminase OS=Apis mellifera OX=7460 PE=3 SV=1
A0A088AEY9	79.62	20	3	3	15526	Uncharacterized protein OS=Apis mellifera OX=7460 GN=LOC552807 PE=4 SV=1
A0A088AQM1	78.23	20	3	3	20496	Uncharacterized protein OS=Apis mellifera OX=7460 GN=Rheb PE=4 SV=1
A0A088AHM1	74.44	20	2	2	15552	Uncharacterized protein OS=Apis mellifera OX=7460 GN=100576945 PE=4 SV=1
A0A088AQ20	68.9	20	2	2	15261	Uncharacterized protein OS=Apis mellifera OX=7460 PE=4 SV=1
P01501	66.82	20	1	1	7585	Melittin OS=Apis mellifera OX=7460 GN=MELT PE=1 SV=1
A0A088AF71	59.52	20	1	1	8083	Uncharacterized protein OS=Apis mellifera OX=7460 GN=LOC725202 PE=4 SV=1
A0A088AGJ1	56.07	20	2	2	9767	Uncharacterized protein OS=Apis mellifera OX=7460 GN=Atp5i PE=4 SV=1
A0A087ZTD7	48.72	20	1	1	6586	Uncharacterized protein OS=Apis mellifera OX=7460 GN=725147 PE=4 SV=1
A0A088ARZ3	44.28	20	1	1	23343	Syndecan OS=Apis mellifera OX=7460 PE=3 SV=1
A0A088A6A4	40.67	20	1	1	10325	Uncharacterized protein OS=Apis mellifera OX=7460 PE=3 SV=1
A0A088AUN0	39.23	20	1	1	13307	Uncharacterized protein OS=Apis mellifera OX=7460 PE=4 SV=1
A0A088A7X2	347.43	21	50	50	386966	Uncharacterized protein OS=Apis mellifera OX=7460 PE=4 SV=1
A0A087ZW55	301.28	21	9	9	38045	Uncharacterized protein OS=Apis mellifera OX=7460 PE=3 SV=1
A0A087ZTB5	243.71	21	9	9	57563	Uncharacterized protein OS=Apis mellifera OX=7460 PE=3 SV=1
A0A088AHG4	243.41	21	16	16	124520	Uncharacterized protein OS=Apis mellifera OX=7460 GN=LOC410201 PE=4 SV=1
A0A088AVH5	243.3	21	10	10	85684	Uncharacterized protein OS=Apis mellifera OX=7460 PE=4 SV=1
A0A088A929	239.63	21	10	10	76921	Uncharacterized protein OS=Apis mellifera OX=7460 PE=4 SV=1
A0A087ZPR9	238.85	21	5	5	37972	GMP reductase OS=Apis mellifera OX=7460 GN=LOC552316 PE=3 SV=1
A0A088AGI6	232.26	21	6	5	35220	Uncharacterized protein OS=Apis mellifera OX=7460 GN=LOC412163 PE=4 SV=1
A0A087ZV81	222.13	21	13	13	109549	Uncharacterized protein OS=Apis mellifera OX=7460 PE=4 SV=1
A0A088ANG2	221.79	21	10	10	76296	Uncharacterized protein OS=Apis mellifera OX=7460 PE=4 SV=1
A0A088AU58	220.61	21	9	9	95082	Uncharacterized protein OS=Apis mellifera OX=7460 PE=4 SV=1
A0A088ATI3	217.51	21	6	6	41257	Uncharacterized protein OS=Apis mellifera OX=7460 GN=LOC410080 PE=4 SV=1
A0A087ZZQ9	210.34	21	7	7	50873	3-hydroxy-3-methylglutaryl coenzyme A synthase OS=Apis mellifera OX=7460 GN=Hmgs PE=3 SV=1
A0A088A1P0	206.78	21	8	8	68248	Uncharacterized protein OS=Apis mellifera OX=7460 GN=vari PE=3 SV=1
A0A088A2K9	196.68	21	6	6	50860	Uncharacterized protein OS=Apis mellifera OX=7460 PE=4 SV=1
A0A088ARN2	193.16	21	8	8	51415	RuvB-like helicase OS=Apis mellifera OX=7460 GN=Reptin PE=3 SV=1
A0A088AJI1	191.95	21	7	7	58255	Uncharacterized protein OS=Apis mellifera OX=7460 GN=sn PE=4 SV=1
A0A088A825	188.84	21	4	4	23590	Histone H2B OS=Apis mellifera OX=7460 GN=LOC725238 PE=3 SV=1
A0A087ZY82	182.52	21	10	10	101379	Coatomer subunit beta' OS=Apis mellifera OX=7460 PE=3 SV=1
A0A088A7I2	179.16	21	7	7	60240	UDP-glucuronosyltransferase OS=Apis mellifera OX=7460 GN=LOC409203 PE=3 SV=1
Q5I4H5	178.77	21	8	8	58336	Tyrosine hydroxylase OS=Apis mellifera OX=7460 GN=TyHyd PE=2 SV=1
A0A088ADU2	176.08	21	9	9	55703	Uncharacterized protein OS=Apis mellifera OX=7460 GN=Fuca PE=3 SV=1
A0A088AL66	172.27	21	9	9	57691	Uncharacterized protein OS=Apis mellifera OX=7460 PE=4 SV=1
A0A088ALY8	167.5	21	5	5	49667	Uncharacterized protein OS=Apis mellifera OX=7460 PE=4 SV=1
A0A087ZQ92	166.94	21	5	5	43056	Uncharacterized protein OS=Apis mellifera OX=7460 GN=LOC409547 PE=4 SV=1
Q5BLY4	163.28	21	5	5	24819	Icarapin-like OS=Apis mellifera OX=7460 PE=2 SV=1
A0A087ZZ65	162.68	21	6	6	56485	Uncharacterized protein OS=Apis mellifera OX=7460 GN=LOC411204 PE=4 SV=1
A0A088A1R1	158.58	21	4	4	18926	Uncharacterized protein OS=Apis mellifera OX=7460 PE=4 SV=1
A0A088ACX5	158.09	21	2	2	17926	Uncharacterized protein OS=Apis mellifera OX=7460 PE=4 SV=1
A0A088ADK7	155.68	21	7	7	61095	Coronin OS=Apis mellifera OX=7460 GN=LOC409316 PE=3 SV=1
A0A088A3I7	155.23	21	7	7	49329	Uncharacterized protein OS=Apis mellifera OX=7460 GN=Vps4 PE=3 SV=1
A0A088ACQ9	153.05	21	4	4	32080	Uncharacterized protein OS=Apis mellifera OX=7460 GN=LOC551047 PE=4 SV=1
A0A088AAP3	146.32	21	3	3	26579	Uncharacterized protein OS=Apis mellifera OX=7460 PE=4 SV=1
A0A088A5F7	146.04	21	6	6	44319	Uncharacterized protein OS=Apis mellifera OX=7460 GN=LOC725740 PE=4 SV=1
A0A087ZTY8	136.21	21	3	3	39058	Uncharacterized protein OS=Apis mellifera OX=7460 GN=LOC551732 PE=4 SV=1
A0A088AHI6	135.55	21	4	4	32188	Uncharacterized protein OS=Apis mellifera OX=7460 PE=4 SV=1
A0A088AAD6	131.62	21	3	3	27290	Phosphatidylinositol-4 5-bisphosphate 4-phosphatase OS=Apis mellifera OX=7460 GN=LOC408301 PE=4 SV=1
A0A088AS49	130.58	21	3	3	24035	Uncharacterized protein OS=Apis mellifera OX=7460 GN=LOC411260 PE=4 SV=1
A0A088A2D4	125.74	21	5	5	30125	Innexin OS=Apis mellifera OX=7460 GN=inx PE=3 SV=1
A0A088A5S3	123.87	21	3	3	23790	Uncharacterized protein OS=Apis mellifera OX=7460 PE=4 SV=1
A0A087ZPI0	122.79	21	4	4	17509	Uncharacterized protein OS=Apis mellifera OX=7460 GN=RpL24 PE=4 SV=1
A0A088AAX0	122.34	21	4	4	20068	Uncharacterized protein OS=Apis mellifera OX=7460 GN=Manf PE=4 SV=1
H9KEI2	121.02	21	4	4	17342	Uncharacterized protein OS=Apis mellifera OX=7460 GN=RpS19a PE=4 SV=1
A0A088ASG4	118.57	21	6	6	55882	Molybdopterin molybdenumtransferase OS=Apis mellifera OX=7460 PE=3 SV=1
A0A088AM30	112.27	21	3	3	10958	Uncharacterized protein OS=Apis mellifera OX=7460 GN=ATPsyn-Cf6 PE=4 SV=1
A0A088AJA4	111.46	21	3	3	26052	Probable methylthioribulose-1-phosphate dehydratase OS=Apis mellifera OX=7460 GN=LOC552014 PE=3 SV=1
A0A088AD80	110.95	21	4	4	37221	Uncharacterized protein OS=Apis mellifera OX=7460 GN=LOC551427 PE=4 SV=1
A0A088AF31	96.61	21	4	4	24664	Uncharacterized protein OS=Apis mellifera OX=7460 GN=LOC409318 PE=4 SV=1
A0A087ZX17	95.87	21	3	3	25001	Uncharacterized protein OS=Apis mellifera OX=7460 PE=4 SV=1
A0A088ASR7	76.47	21	1	1	6812	Uncharacterized protein OS=Apis mellifera OX=7460 PE=4 SV=1
A0A087ZUP3	61.86	21	1	1	10148	Uncharacterized protein OS=Apis mellifera OX=7460 PE=4 SV=1
A0A088AJJ7	61.33	21	1	1	15934	Uncharacterized protein OS=Apis mellifera OX=7460 PE=4 SV=1
I7LRF0	60.89	21	2	2	16807	Troponin C type I OS=Apis mellifera OX=7460 GN=TpnCI PE=4 SV=1
A0A088A6P9	26.84	21	1	1	9237	Protein Wnt OS=Apis mellifera OX=7460 PE=3 SV=1
A0A087ZNC5	356.75	22	20	20	124472	Microtubule-associated protein OS=Apis mellifera OX=7460 PE=4 SV=1
A0A088AFA3	335	22	12	12	106859	Uncharacterized protein OS=Apis mellifera OX=7460 GN=LOC410613 PE=4 SV=1
A0A087ZZE9	308.83	22	19	19	119339	Uncharacterized protein OS=Apis mellifera OX=7460 PE=4 SV=1
A0A088AV13	300.68	22	19	19	171834	Uncharacterized protein OS=Apis mellifera OX=7460 PE=4 SV=1
A0A088A5N6	264.44	22	17	17	176698	Uncharacterized protein OS=Apis mellifera OX=7460 PE=4 SV=1
A0A088ATY3	263.1	22	15	15	124777	Uncharacterized protein OS=Apis mellifera OX=7460 GN=LOC409348 PE=4 SV=1
A0A088AIY7	262.35	22	8	8	51888	Uncharacterized protein OS=Apis mellifera OX=7460 GN=LOC409640 PE=4 SV=1
A0A088A822	262.02	22	12	12	85034	Delta-1-pyrroline-5-carboxylate synthase OS=Apis mellifera OX=7460 GN=LOC412948 PE=3 SV=1
A0A088AMM2	257.77	22	18	18	113676	Uncharacterized protein OS=Apis mellifera OX=7460 GN=opa1-like PE=3 SV=1
A0A088ADV3	253.71	22	7	7	36062	Succinate--CoA ligase [ADP/GDP-forming] subunit alpha mitochondrial OS=Apis mellifera OX=7460 GN=Scsalpha PE=3 SV=1
Q5XQT6	239.63	22	10	10	76350	Hyperpolarization-activated ion channel variant L OS=Apis mellifera OX=7460 PE=2 SV=1
A0A088A7X3	225.22	22	16	16	128845	Uncharacterized protein OS=Apis mellifera OX=7460 PE=4 SV=1
A0A088A5P5	220.37	22	13	13	85585	Uncharacterized protein OS=Apis mellifera OX=7460 GN=LOC410289 PE=4 SV=1
A0A087ZQJ6	205.25	22	5	5	21380	Uncharacterized protein OS=Apis mellifera OX=7460 GN=RpL17 PE=3 SV=1
A0A088ARG0	201.18	22	7	7	53799	Uncharacterized protein OS=Apis mellifera OX=7460 GN=LOC409548 PE=4 SV=1
A0A088AVE4	198.86	22	5	5	38467	Uncharacterized protein OS=Apis mellifera OX=7460 PE=4 SV=1
A0A088ART4	196.69	22	3	3	18664	Uncharacterized protein OS=Apis mellifera OX=7460 PE=4 SV=1
A0A088A5E4	192.56	22	5	5	56648	Uncharacterized protein OS=Apis mellifera OX=7460 GN=LOC409739 PE=4 SV=1
A0A088ANE8	189.24	22	8	8	56915	Uncharacterized protein OS=Apis mellifera OX=7460 PE=4 SV=1
A0A088AID6	186.94	22	6	6	45237	Uncharacterized protein OS=Apis mellifera OX=7460 GN=LOC408557 PE=3 SV=1
A0A088ALQ8	185.73	22	8	8	50736	Oxysterol-binding protein OS=Apis mellifera OX=7460 PE=3 SV=1
A0A088AK62	183.09	22	7	7	54906	Fibroblast growth factor OS=Apis mellifera OX=7460 PE=3 SV=1
A0A088A8A5	180.05	22	6	6	46921	Uncharacterized protein OS=Apis mellifera OX=7460 PE=4 SV=1
A0A088A873	178.25	22	11	11	60004	Uncharacterized protein OS=Apis mellifera OX=7460 PE=4 SV=1
A0A088ABL2	171.42	22	4	4	28113	Uncharacterized protein OS=Apis mellifera OX=7460 GN=RpL8 PE=3 SV=1
A0A087ZQM3	168.79	22	4	4	19795	Uncharacterized protein OS=Apis mellifera OX=7460 PE=4 SV=1
A0A088A0N4	159.24	22	4	4	35580	Uncharacterized protein OS=Apis mellifera OX=7460 GN=Mtch PE=3 SV=1
A0A087ZNK5	151.86	22	5	5	32519	Uncharacterized protein OS=Apis mellifera OX=7460 GN=100578522 PE=4 SV=1
A0A088ALL5	151.25	22	5	5	34193	Uncharacterized protein OS=Apis mellifera OX=7460 GN=LOC408696 PE=4 SV=1
A0A088A5R3	150.02	22	5	5	25034	Uncharacterized protein OS=Apis mellifera OX=7460 GN=Rab21 PE=4 SV=1
A0A087ZXE4	148.94	22	3	3	35435	Uncharacterized protein OS=Apis mellifera OX=7460 PE=3 SV=1
A0A087ZSQ8	146.63	22	4	4	35531	Uncharacterized protein OS=Apis mellifera OX=7460 GN=726713 PE=4 SV=1
A0A088AUY1	145.48	22	5	5	33487	Uncharacterized protein OS=Apis mellifera OX=7460 GN=LOC725626 PE=4 SV=1
[truncated: 1,087 more rows]

## Sheet: 3.3
Supplementary Data 3.3. Differentially expressed proteins (fold change≧1.5 and p<0.05) between brains of microbiota-free and conventionalized bees. The value of -10lgP is a conversion of P-value of the identified proteins. Group Profile (Ratio): The ratio of group mean protein intensity.
Accession	Gene name	Significance (-10lgP)	Coverage (%)	#Peptides	#Unique	MF			Mean Area	CV			Mean Area	Group Profile (Ratio)	Mass	Description
						Sample 1 Area	Sample 2 Area	Sample 3 Area		Sample 1 Area	Sample 2 Area	Sample 3 Area
A0A087ZR09	pix	17.57	2	1	1	1130000	1130000	1260000	1170000	2150000	1990000	1610000	1920000	1.00:1.64	68433	ATP-binding cassette sub-family E member 1
A0A088AJH6	LOC412299	13.28	4	1	1	881000	790000	1050000	907000	1210000	2010000	1500000	1570000	1.00:1.73	64905	muscarinic acetylcholine receptor DM1
A0A088AD43	U2af38	14.17	7	1	1	1960000	2110000	0	2040000	4980000	3450000	3180000	3870000	1.00:1.90	28269	splicing factor U2af 38 kDa subunit
A0A088AU21	Mrjp6	13.15	9	2	2	11000000	5170000	4710000	6970000	905000	102000	825000	777000	1.00:0.11	49879	major royal jelly protein 6
A0A088AF71	LOC725202	18.63	20	1	1	36000000	19200000	39300000	31500000	7120000	12100000	5640000	8290000	1.00:0.26	8083	chymotrypsin inhibitor-like
A0A088AJR6	LOC410149	14.42	3	1	1	6830000	2490000	5370000	4900000	1130000	2110000	837000	1360000	1.00:0.28	52947	carboxypeptidase Q
P17722	Def1	15.49	27	2	2	87400000	40800000	72000000	66800000	20700000	24700000	18400000	21300000	1.00:0.32	10717	defensin-1 preproprotein
A0A087ZYK5	LOC410376	14.47	7	1	1	8070000	8160000	3870000	6700000	3250000	1940000	2070000	2420000	1.00:0.36	22988	peptidyl-tRNA hydrolase ICT1, mitochondrial
A0A088A6V5	LOC107964206	14.32	3	1	1	1570000	1370000	2550000	1830000	828000	1050000	668000	847000	1.00:0.46	44444	zinc finger protein 717 isoform X1
A0A088AHE9	LOC726977	16.58	5	1	1	1620000	1590000	2330000	1850000	1120000	883000	987000	998000	1.00:0.54	34987	prostaglandin E synthase 2
A0A087ZUL8	RpS15	13.28	18	1	1	2900000	4490000	4300000	3900000	1630000	2690000	2280000	2200000	1.00:0.56	16954	40S ribosomal protein S15
A0A087ZV20	LOC408391	13.35	10	2	2	8890000	9920000	8700000	9170000	6540000	6120000	4390000	5680000	1.00:0.62	48546	AP-1 complex subunit mu-1
A0A088AQN0	LOC100578005	13.85	3	1	1	1620000	1320000	1080000	1340000	708000	844000	978000	843000	1.00:0.63	52168	nucleolar protein 56
A0A088AHA4	RpL30	18.27	42	4	4	80500000	74200000	82000000	79700000	61700000	53000000	48300000	54300000	1.00:0.67	12545	60S ribosomal protein L30

## Sheet: 3.4
Supplementary Data 3.4. Functional group and biological pathway enriched by unique proteins in brains of conventionalized bees. GO: gene ontology. GO Term: the identified protein enriched to associated functional GO terms using ClueGO software Cytoscape plug-in. GO levels: the levels attribute to GO terms acoording to the structure of GO tree. GO Groups: cluster of the similar functional term. Nr…
GO ID	Ontology Source	GOTerm	GOLevels	GOGroups	Nr. Genes	% Associated Genes	Term PValue	Term PValue Corrected with Bonferroni step down	Group PValue	Group PValue Corrected with Bonferroni step down	Associated Genes Found	All Associated Genes	OverViewTerm
[truncated: 10 more rows]
